# Supplementary material
Source: publisher figshare collection journal article supplement (https://rs.figshare.com/ndownloader/files/13877375)
Supplement: Supplementary file 1 [file 13877375]

## Sheet: HEADERS
Header	Details
Node ID	Node ID on the tree
No Taxa	Number of descendant taxa (tips) for that node/branch
Original BL	The original branch length of the time tree in Myr
No different from original	The number of times in the posterior sample in which the branch is different in length compared to the original BL
Pct time scaled	Percent of times branch is scaled in the posterior sample of trees
Mean Scalar	The mean value of the posterior sample of rate scalars
Mode Scalar	The modal value of the posterior distribution of rate scalars
Median Scalar	The median value of the posterior sample of rate scalars
SD Scalar	Standard deviation of the posterior sample of rate scalars
Mean SigV	The mean value of the posterior distribution of the Brownian variance
Mode SigV	The modal value of the posterior distribution of the Brownian variance
Median SigV	The median value of the posterior distribution of the Brownian variance
SD SigV	The standard deviation of the posterior distribution of the Brownian variance
Mean DeltaB	The mean value of the posterior sample of DeltaB (the expected variance occurring along a branch given background rate) (Baker et al., 2016. Biol J Linn Soc 118: 95-115)
Mode DeltaB	The modal value of the posterior sample of DeltaB (the expected variance occurring along a branch given background rate) (Baker et al., 2016. Biol J Linn Soc 118: 95-115)
Median DeltaB	The median value of the posterior sample of DeltaB (the expected variance occurring along a branch given background rate) (Baker et al., 2016. Biol J Linn Soc 118: 95-115)
SD DeltaB	The standard deviation of the posterior sample of DeltaB (the expected variance occurring along a branch given background rate) (Baker et al., 2016. Biol J Linn Soc 118: 95-115)
Mean DeltaV	The mean value of the posterior sample of DeltaV (the expected variance occurring along a branch as a consequence of rate variation) (Baker et al., 2016. Biol J Linn Soc 118: 95-115)
Mode DeltaV	The modal value of the posterior sample of DeltaV (the expected variance occurring along a branch as a consequence of rate variation) (Baker et al., 2016. Biol J Linn Soc 118: 95-115)
Median DeltaV	The median value of the posterior sample of DeltaV (the expected variance occurring along a branch as a consequence of rate variation) (Baker et al., 2016. Biol J Linn Soc 118: 95-115)
SD DeltaV	The standard deviation of the posterior sample of DeltaV (the expected variance occurring along a branch as a consequence of rate variation) (Baker et al., 2016. Biol J Linn Soc 118: 95-115)
Taxa List	List of descendant taxon names
PPS	Positive Phenotypic Selection: branch fulfills two criteria - 1) median rate scalar > 2; 2) Pct time scaled > 95

## Sheet: Summary
	Table S2. Branch-wise rates and significant shifts (positive phenotypic selection [PPS])
	Node ID	No Taxa	Taxa List	PPS_rep1	PPS_rep2	PPS_rep3	PPS in all three reps
	0	434	Accipiter_cooperii,Accipiter_striatus,Acinonyx_jubatus,Ailuropoda_melanoleuca,Ailurus_fulgens,Alligator_mississippiensis,Alligator_sinensis,Allosaurus_fragilis,Alouatta_guariba,Amadina_erythrocephala,Amadina_fasciata,Anolis_chloris,Anolis_cristatellus,Anolis_distichus,Anolis_equestris,Anolis_garmani,Anolis_gundlachi,Anolis_limifrons,Anolis_oxylophus,Anolis_pulchellus,Anolis_sheplani,Anolis_valenc…	0	0	0	0
	1	295	Acinonyx_jubatus,Ailuropoda_melanoleuca,Ailurus_fulgens,Alouatta_guariba,Aonyx_capensis,Aonyx_cinerea,Aotus_trivirgatus,Arctictis_binturong,Arctogalidia_trivirgata,Artibeus_jamaicensis,Artibeus_lituratus,Ateles_geoffroyi,Atelocynus_microtis,Australopithecus_afarensis,Australopithecus_africanus,Australopithecus_anamensis,Avahi_laniger,Bassaricyon_alleni,Bassaricyon_gabbii,Bassariscus_astutus,Bassa…	0	0	0	0
	2	286	Acinonyx_jubatus,Ailuropoda_melanoleuca,Ailurus_fulgens,Alouatta_guariba,Aonyx_capensis,Aonyx_cinerea,Aotus_trivirgatus,Arctictis_binturong,Arctogalidia_trivirgata,Artibeus_jamaicensis,Artibeus_lituratus,Ateles_geoffroyi,Atelocynus_microtis,Australopithecus_afarensis,Australopithecus_africanus,Australopithecus_anamensis,Avahi_laniger,Bassaricyon_alleni,Bassaricyon_gabbii,Bassariscus_astutus,Bassa…	0	0	0	0
	3	231	Acinonyx_jubatus,Ailuropoda_melanoleuca,Ailurus_fulgens,Aonyx_capensis,Aonyx_cinerea,Arctictis_binturong,Arctogalidia_trivirgata,Artibeus_jamaicensis,Artibeus_lituratus,Atelocynus_microtis,Bassaricyon_alleni,Bassaricyon_gabbii,Bassariscus_astutus,Bassariscus_sumichrasti,Bdeogale_crassicauda,Canis_adustus,Canis_aureus,Canis_latrans,Canis_lupus,Canis_mesomelas,Caracal_aurata,Caracal_caracal,Carolli…	0	0	0	0
	4	165	Acinonyx_jubatus,Ailuropoda_melanoleuca,Ailurus_fulgens,Aonyx_capensis,Aonyx_cinerea,Arctictis_binturong,Arctogalidia_trivirgata,Atelocynus_microtis,Bassaricyon_alleni,Bassaricyon_gabbii,Bassariscus_astutus,Bassariscus_sumichrasti,Bdeogale_crassicauda,Canis_adustus,Canis_aureus,Canis_latrans,Canis_lupus,Canis_mesomelas,Caracal_aurata,Caracal_caracal,Cerdocyon_thous,Chrysocyon_brachyurus,Civettict…	0	0	0	0
	5	163	Acinonyx_jubatus,Ailuropoda_melanoleuca,Ailurus_fulgens,Aonyx_capensis,Aonyx_cinerea,Arctictis_binturong,Arctogalidia_trivirgata,Atelocynus_microtis,Bassaricyon_alleni,Bassaricyon_gabbii,Bassariscus_astutus,Bassariscus_sumichrasti,Bdeogale_crassicauda,Canis_adustus,Canis_aureus,Canis_latrans,Canis_lupus,Canis_mesomelas,Caracal_aurata,Caracal_caracal,Cerdocyon_thous,Chrysocyon_brachyurus,Civettict…	0	0	0	0
	6	79	Ailuropoda_melanoleuca,Ailurus_fulgens,Aonyx_capensis,Aonyx_cinerea,Atelocynus_microtis,Bassaricyon_alleni,Bassaricyon_gabbii,Bassariscus_astutus,Bassariscus_sumichrasti,Canis_adustus,Canis_aureus,Canis_latrans,Canis_lupus,Canis_mesomelas,Cerdocyon_thous,Chrysocyon_brachyurus,Conepatus_semistriatus,Cuon_alpinus,Eira_barbara,Enhydra_lutris,Galictis_cuja,Gulo_gulo,Helarctos_malayanus,Hydrictis_macu…	0	0	0	0
	7	25	Atelocynus_microtis,Canis_adustus,Canis_aureus,Canis_latrans,Canis_lupus,Canis_mesomelas,Cerdocyon_thous,Chrysocyon_brachyurus,Cuon_alpinus,Lycalopex_culpaeus,Lycalopex_griseus,Lycalopex_gymnocercus,Lycalopex_vetulus,Lycaon_pictus,Nyctereutes_procyonoides,Otocyon_megalotis,Speothos_venaticus,Urocyon_cinereoargenteus,Vulpes_chama,Vulpes_ferrilata,Vulpes_lagopus,Vulpes_rueppellii,Vulpes_velox,Vulpe…	0	0	0	0
	8	24	Atelocynus_microtis,Canis_adustus,Canis_aureus,Canis_latrans,Canis_lupus,Canis_mesomelas,Cerdocyon_thous,Chrysocyon_brachyurus,Cuon_alpinus,Lycalopex_culpaeus,Lycalopex_griseus,Lycalopex_gymnocercus,Lycalopex_vetulus,Lycaon_pictus,Nyctereutes_procyonoides,Otocyon_megalotis,Speothos_venaticus,Vulpes_chama,Vulpes_ferrilata,Vulpes_lagopus,Vulpes_rueppellii,Vulpes_velox,Vulpes_vulpes,Vulpes_zerda	0	0	0	0
	9	16	Atelocynus_microtis,Canis_adustus,Canis_aureus,Canis_latrans,Canis_lupus,Canis_mesomelas,Cerdocyon_thous,Chrysocyon_brachyurus,Cuon_alpinus,Lycalopex_culpaeus,Lycalopex_griseus,Lycalopex_gymnocercus,Lycalopex_vetulus,Lycaon_pictus,Nyctereutes_procyonoides,Speothos_venaticus	0	0	0	0
	10	1	Nyctereutes_procyonoides	0	0	0	0
	11	15	Atelocynus_microtis,Canis_adustus,Canis_aureus,Canis_latrans,Canis_lupus,Canis_mesomelas,Cerdocyon_thous,Chrysocyon_brachyurus,Cuon_alpinus,Lycalopex_culpaeus,Lycalopex_griseus,Lycalopex_gymnocercus,Lycalopex_vetulus,Lycaon_pictus,Speothos_venaticus	0	0	0	0
	12	4	Chrysocyon_brachyurus,Cuon_alpinus,Lycaon_pictus,Speothos_venaticus	0	0	0	0
	13	2	Chrysocyon_brachyurus,Cuon_alpinus	0	0	0	0
	14	1	Chrysocyon_brachyurus	0	0	0	0
	15	1	Cuon_alpinus	0	0	0	0
	16	2	Lycaon_pictus,Speothos_venaticus	0	0	0	0
	17	1	Lycaon_pictus	0	0	0	0
	18	1	Speothos_venaticus	0	0	0	0
	19	11	Atelocynus_microtis,Canis_adustus,Canis_aureus,Canis_latrans,Canis_lupus,Canis_mesomelas,Cerdocyon_thous,Lycalopex_culpaeus,Lycalopex_griseus,Lycalopex_gymnocercus,Lycalopex_vetulus	0	0	0	0
	20	6	Atelocynus_microtis,Cerdocyon_thous,Lycalopex_culpaeus,Lycalopex_griseus,Lycalopex_gymnocercus,Lycalopex_vetulus	0	0	0	0
	21	5	Cerdocyon_thous,Lycalopex_culpaeus,Lycalopex_griseus,Lycalopex_gymnocercus,Lycalopex_vetulus	0	0	0	0
	22	4	Lycalopex_culpaeus,Lycalopex_griseus,Lycalopex_gymnocercus,Lycalopex_vetulus	0	0	0	0
	23	1	Lycalopex_vetulus	0	0	0	0
	24	3	Lycalopex_culpaeus,Lycalopex_griseus,Lycalopex_gymnocercus	0	0	0	0
	25	2	Lycalopex_culpaeus,Lycalopex_gymnocercus	0	0	0	0
	26	1	Lycalopex_culpaeus	0	0	0	0
	27	1	Lycalopex_gymnocercus	0	0	0	0
	28	1	Lycalopex_griseus	0	0	0	0
	29	1	Cerdocyon_thous	0	0	0	0
	30	1	Atelocynus_microtis	0	0	0	0
	31	5	Canis_adustus,Canis_aureus,Canis_latrans,Canis_lupus,Canis_mesomelas	0	0	0	0
	32	2	Canis_adustus,Canis_mesomelas	0	0	0	0
	33	1	Canis_adustus	0	0	0	0
	34	1	Canis_mesomelas	0	0	0	0
	35	3	Canis_aureus,Canis_latrans,Canis_lupus	0	0	0	0
	36	1	Canis_lupus	0	0	0	0
	37	2	Canis_aureus,Canis_latrans	0	0	0	0
	38	1	Canis_latrans	0	0	0	0
	39	1	Canis_aureus	0	0	0	0
	40	8	Otocyon_megalotis,Vulpes_chama,Vulpes_ferrilata,Vulpes_lagopus,Vulpes_rueppellii,Vulpes_velox,Vulpes_vulpes,Vulpes_zerda	0	0	0	0
	41	1	Otocyon_megalotis	0	0	0	0
	42	7	Vulpes_chama,Vulpes_ferrilata,Vulpes_lagopus,Vulpes_rueppellii,Vulpes_velox,Vulpes_vulpes,Vulpes_zerda	0	0	0	0
	43	1	Vulpes_ferrilata	0	0	0	0
	44	6	Vulpes_chama,Vulpes_lagopus,Vulpes_rueppellii,Vulpes_velox,Vulpes_vulpes,Vulpes_zerda	0	0	0	0
	45	5	Vulpes_lagopus,Vulpes_rueppellii,Vulpes_velox,Vulpes_vulpes,Vulpes_zerda	0	0	0	0
	46	4	Vulpes_lagopus,Vulpes_rueppellii,Vulpes_velox,Vulpes_vulpes	0	0	0	0
	47	2	Vulpes_rueppellii,Vulpes_vulpes	0	0	0	0
	48	1	Vulpes_vulpes	0	0	0	0
	49	1	Vulpes_rueppellii	0	0	0	0
	50	2	Vulpes_lagopus,Vulpes_velox	0	0	0	0
	51	1	Vulpes_lagopus	0	0	0	0
	52	1	Vulpes_velox	0	0	0	0
	53	1	Vulpes_zerda	0	0	0	0
	54	1	Vulpes_chama	0	0	0	0
	55	1	Urocyon_cinereoargenteus	0	0	0	0
	56	54	Ailuropoda_melanoleuca,Ailurus_fulgens,Aonyx_capensis,Aonyx_cinerea,Bassaricyon_alleni,Bassaricyon_gabbii,Bassariscus_astutus,Bassariscus_sumichrasti,Conepatus_semistriatus,Eira_barbara,Enhydra_lutris,Galictis_cuja,Gulo_gulo,Helarctos_malayanus,Hydrictis_maculicollis,Ictonyx_libyca,Ictonyx_striatus,Lontra_canadensis,Lontra_felina,Lontra_longicaudis,Lutra_lutra,Lutra_sumatrana,Lutrogale_perspicill…	0	0	0	0
	57	46	Ailurus_fulgens,Aonyx_capensis,Aonyx_cinerea,Bassaricyon_alleni,Bassaricyon_gabbii,Bassariscus_astutus,Bassariscus_sumichrasti,Conepatus_semistriatus,Eira_barbara,Enhydra_lutris,Galictis_cuja,Gulo_gulo,Hydrictis_maculicollis,Ictonyx_libyca,Ictonyx_striatus,Lontra_canadensis,Lontra_felina,Lontra_longicaudis,Lutra_lutra,Lutra_sumatrana,Lutrogale_perspicillata,Martes_americana,Martes_flavigula,Marte…	0	0	0	0
	58	42	Ailurus_fulgens,Aonyx_capensis,Aonyx_cinerea,Bassaricyon_alleni,Bassaricyon_gabbii,Bassariscus_astutus,Bassariscus_sumichrasti,Eira_barbara,Enhydra_lutris,Galictis_cuja,Gulo_gulo,Hydrictis_maculicollis,Ictonyx_libyca,Ictonyx_striatus,Lontra_canadensis,Lontra_felina,Lontra_longicaudis,Lutra_lutra,Lutra_sumatrana,Lutrogale_perspicillata,Martes_americana,Martes_flavigula,Martes_foina,Martes_martes,M…	0	0	0	0
	59	41	Aonyx_capensis,Aonyx_cinerea,Bassaricyon_alleni,Bassaricyon_gabbii,Bassariscus_astutus,Bassariscus_sumichrasti,Eira_barbara,Enhydra_lutris,Galictis_cuja,Gulo_gulo,Hydrictis_maculicollis,Ictonyx_libyca,Ictonyx_striatus,Lontra_canadensis,Lontra_felina,Lontra_longicaudis,Lutra_lutra,Lutra_sumatrana,Lutrogale_perspicillata,Martes_americana,Martes_flavigula,Martes_foina,Martes_martes,Martes_pennanti,M…	0	0	0	0
	60	9	Bassaricyon_alleni,Bassaricyon_gabbii,Bassariscus_astutus,Bassariscus_sumichrasti,Nasua_nasua,Nasuella_olivacea,Potos_flavus,Procyon_cancrivorus,Procyon_lotor	0	0	0	0
	61	1	Potos_flavus	0	0	0	0
	62	8	Bassaricyon_alleni,Bassaricyon_gabbii,Bassariscus_astutus,Bassariscus_sumichrasti,Nasua_nasua,Nasuella_olivacea,Procyon_cancrivorus,Procyon_lotor	0	0	0	0
	63	4	Bassariscus_astutus,Bassariscus_sumichrasti,Procyon_cancrivorus,Procyon_lotor	0	0	0	0
	64	2	Procyon_cancrivorus,Procyon_lotor	0	0	0	0
	65	1	Procyon_cancrivorus	0	0	0	0
	66	1	Procyon_lotor	0	0	0	0
	67	2	Bassariscus_astutus,Bassariscus_sumichrasti	0	0	0	0
	68	1	Bassariscus_sumichrasti	0	0	0	0
	69	1	Bassariscus_astutus	0	0	0	0
	70	4	Bassaricyon_alleni,Bassaricyon_gabbii,Nasua_nasua,Nasuella_olivacea	0	0	0	0
	71	2	Nasua_nasua,Nasuella_olivacea	0	0	0	0
	72	1	Nasua_nasua	0	0	0	0
	73	1	Nasuella_olivacea	0	0	0	0
	74	2	Bassaricyon_alleni,Bassaricyon_gabbii	0	0	0	0
	75	1	Bassaricyon_gabbii	0	0	0	0
	76	1	Bassaricyon_alleni	0	0	0	0
	77	32	Aonyx_capensis,Aonyx_cinerea,Eira_barbara,Enhydra_lutris,Galictis_cuja,Gulo_gulo,Hydrictis_maculicollis,Ictonyx_libyca,Ictonyx_striatus,Lontra_canadensis,Lontra_felina,Lontra_longicaudis,Lutra_lutra,Lutra_sumatrana,Lutrogale_perspicillata,Martes_americana,Martes_flavigula,Martes_foina,Martes_martes,Martes_pennanti,Meles_meles,Mellivora_capensis,Mustela_africana,Mustela_altaica,Mustela_erminea,Mus…	0	0	0	0
	78	31	Aonyx_capensis,Aonyx_cinerea,Eira_barbara,Enhydra_lutris,Galictis_cuja,Gulo_gulo,Hydrictis_maculicollis,Ictonyx_libyca,Ictonyx_striatus,Lontra_canadensis,Lontra_felina,Lontra_longicaudis,Lutra_lutra,Lutra_sumatrana,Lutrogale_perspicillata,Martes_americana,Martes_flavigula,Martes_foina,Martes_martes,Martes_pennanti,Meles_meles,Mellivora_capensis,Mustela_africana,Mustela_altaica,Mustela_erminea,Mus…	0	0	0	0
	79	30	Aonyx_capensis,Aonyx_cinerea,Eira_barbara,Enhydra_lutris,Galictis_cuja,Gulo_gulo,Hydrictis_maculicollis,Ictonyx_libyca,Ictonyx_striatus,Lontra_canadensis,Lontra_felina,Lontra_longicaudis,Lutra_lutra,Lutra_sumatrana,Lutrogale_perspicillata,Martes_americana,Martes_flavigula,Martes_foina,Martes_martes,Martes_pennanti,Meles_meles,Mustela_africana,Mustela_altaica,Mustela_erminea,Mustela_frenata,Mustel…	0	0	0	0
	80	29	Aonyx_capensis,Aonyx_cinerea,Eira_barbara,Enhydra_lutris,Galictis_cuja,Gulo_gulo,Hydrictis_maculicollis,Ictonyx_libyca,Ictonyx_striatus,Lontra_canadensis,Lontra_felina,Lontra_longicaudis,Lutra_lutra,Lutra_sumatrana,Lutrogale_perspicillata,Martes_americana,Martes_flavigula,Martes_foina,Martes_martes,Martes_pennanti,Mustela_africana,Mustela_altaica,Mustela_erminea,Mustela_frenata,Mustela_lutreola,M…	0	0	0	0
	81	7	Eira_barbara,Gulo_gulo,Martes_americana,Martes_flavigula,Martes_foina,Martes_martes,Martes_pennanti	0	0	0	0
	82	1	Eira_barbara	0	0	0	0
	83	6	Gulo_gulo,Martes_americana,Martes_flavigula,Martes_foina,Martes_martes,Martes_pennanti	0	0	0	0
	84	5	Martes_americana,Martes_flavigula,Martes_foina,Martes_martes,Martes_pennanti	0	0	0	0
	85	4	Martes_americana,Martes_flavigula,Martes_foina,Martes_martes	0	0	0	0
	86	1	Martes_flavigula	0	0	0	0
	87	3	Martes_americana,Martes_foina,Martes_martes	0	0	0	0
	88	2	Martes_americana,Martes_martes	0	0	0	0
	89	1	Martes_americana	0	0	0	0
	90	1	Martes_martes	0	0	0	0
	91	1	Martes_foina	0	0	0	0
	92	1	Martes_pennanti	0	0	0	0
	93	1	Gulo_gulo	0	0	0	0
	94	22	Aonyx_capensis,Aonyx_cinerea,Enhydra_lutris,Galictis_cuja,Hydrictis_maculicollis,Ictonyx_libyca,Ictonyx_striatus,Lontra_canadensis,Lontra_felina,Lontra_longicaudis,Lutra_lutra,Lutra_sumatrana,Lutrogale_perspicillata,Mustela_africana,Mustela_altaica,Mustela_erminea,Mustela_frenata,Mustela_lutreola,Mustela_nivalis,Mustela_putorius,Neovison_vison,Pteronura_brasiliensis	0	0	0	0
	95	14	Aonyx_capensis,Aonyx_cinerea,Enhydra_lutris,Galictis_cuja,Hydrictis_maculicollis,Ictonyx_libyca,Ictonyx_striatus,Lontra_canadensis,Lontra_felina,Lontra_longicaudis,Lutra_lutra,Lutra_sumatrana,Lutrogale_perspicillata,Pteronura_brasiliensis	0	0	0	0
	96	11	Aonyx_capensis,Aonyx_cinerea,Enhydra_lutris,Hydrictis_maculicollis,Lontra_canadensis,Lontra_felina,Lontra_longicaudis,Lutra_lutra,Lutra_sumatrana,Lutrogale_perspicillata,Pteronura_brasiliensis	0	0	0	0
	97	1	Pteronura_brasiliensis	0	0	0	0
	98	10	Aonyx_capensis,Aonyx_cinerea,Enhydra_lutris,Hydrictis_maculicollis,Lontra_canadensis,Lontra_felina,Lontra_longicaudis,Lutra_lutra,Lutra_sumatrana,Lutrogale_perspicillata	0	0	0	0
	99	7	Aonyx_capensis,Aonyx_cinerea,Enhydra_lutris,Hydrictis_maculicollis,Lutra_lutra,Lutra_sumatrana,Lutrogale_perspicillata	0	0	0	0
	100	6	Aonyx_capensis,Aonyx_cinerea,Hydrictis_maculicollis,Lutra_lutra,Lutra_sumatrana,Lutrogale_perspicillata	0	0	0	0
	101	5	Aonyx_capensis,Aonyx_cinerea,Lutra_lutra,Lutra_sumatrana,Lutrogale_perspicillata	0	0	0	0
	102	3	Aonyx_capensis,Aonyx_cinerea,Lutrogale_perspicillata	0	0	0	0
	103	2	Aonyx_capensis,Aonyx_cinerea	0	0	0	0
	104	1	Aonyx_cinerea	0	0	0	0
	105	1	Aonyx_capensis	0	0	0	0
	106	1	Lutrogale_perspicillata	0	0	0	0
	107	2	Lutra_lutra,Lutra_sumatrana	0	0	0	0
	108	1	Lutra_sumatrana	0	0	0	0
	109	1	Lutra_lutra	0	0	0	0
	110	1	Hydrictis_maculicollis	0	0	0	0
	111	1	Enhydra_lutris	0	0	0	0
	112	3	Lontra_canadensis,Lontra_felina,Lontra_longicaudis	0	0	0	0
	113	1	Lontra_canadensis	0	0	0	0
	114	2	Lontra_felina,Lontra_longicaudis	0	0	0	0
	115	1	Lontra_felina	0	0	0	0
	116	1	Lontra_longicaudis	0	0	0	0
	117	3	Galictis_cuja,Ictonyx_libyca,Ictonyx_striatus	0	0	0	0
	118	1	Galictis_cuja	0	0	0	0
	119	2	Ictonyx_libyca,Ictonyx_striatus	0	0	0	0
	120	1	Ictonyx_libyca	0	0	0	0
	121	1	Ictonyx_striatus	0	0	0	0
	122	8	Mustela_africana,Mustela_altaica,Mustela_erminea,Mustela_frenata,Mustela_lutreola,Mustela_nivalis,Mustela_putorius,Neovison_vison	0	0	0	0
	123	3	Mustela_africana,Mustela_frenata,Neovison_vison	0	0	0	0
	124	2	Mustela_africana,Mustela_frenata	0	0	0	0
	125	1	Mustela_africana	0	0	0	0
	126	1	Mustela_frenata	0	0	0	0
	127	1	Neovison_vison	0	0	0	0
	128	5	Mustela_altaica,Mustela_erminea,Mustela_lutreola,Mustela_nivalis,Mustela_putorius	0	0	0	0
	129	4	Mustela_altaica,Mustela_lutreola,Mustela_nivalis,Mustela_putorius	0	0	0	0
	130	2	Mustela_altaica,Mustela_nivalis	0	0	0	0
	131	1	Mustela_nivalis	0	0	0	0
	132	1	Mustela_altaica	0	0	0	0
	133	2	Mustela_lutreola,Mustela_putorius	0	0	0	0
	134	1	Mustela_putorius	0	0	0	0
	135	1	Mustela_lutreola	0	0	0	0
	136	1	Mustela_erminea	0	0	0	0
	137	1	Meles_meles	0	0	0	0
	138	1	Mellivora_capensis	0	0	0	0
	139	1	Taxidea_taxus	0	0	0	0
	140	1	Ailurus_fulgens	0	0	0	0
	141	4	Conepatus_semistriatus,Mephitis_macroura,Mephitis_mephitis,Mydaus_javanensis	0	0	0	0
	142	1	Mydaus_javanensis	0	0	0	0
	143	3	Conepatus_semistriatus,Mephitis_macroura,Mephitis_mephitis	0	0	0	0
	144	2	Mephitis_macroura,Mephitis_mephitis	0	0	0	0
	145	1	Mephitis_mephitis	0	0	0	0
	146	1	Mephitis_macroura	0	0	0	0
	147	1	Conepatus_semistriatus	0	0	0	0
	148	8	Ailuropoda_melanoleuca,Helarctos_malayanus,Melursus_ursinus,Tremarctos_ornatus,Ursus_americanus,Ursus_arctos,Ursus_maritimus,Ursus_thibetanus	0	0	0	0
	149	1	Ailuropoda_melanoleuca	0	0	0	0
	150	7	Helarctos_malayanus,Melursus_ursinus,Tremarctos_ornatus,Ursus_americanus,Ursus_arctos,Ursus_maritimus,Ursus_thibetanus	0	0	0	0
	151	6	Helarctos_malayanus,Melursus_ursinus,Ursus_americanus,Ursus_arctos,Ursus_maritimus,Ursus_thibetanus	0	0	0	0
	152	5	Helarctos_malayanus,Ursus_americanus,Ursus_arctos,Ursus_maritimus,Ursus_thibetanus	0	0	0	0
	153	3	Helarctos_malayanus,Ursus_americanus,Ursus_thibetanus	0	0	0	0
	154	2	Ursus_americanus,Ursus_thibetanus	0	0	0	0
	155	1	Ursus_thibetanus	0	0	0	0
	156	1	Ursus_americanus	0	0	0	0
	157	1	Helarctos_malayanus	0	0	0	0
	158	2	Ursus_arctos,Ursus_maritimus	0	0	0	0
	159	1	Ursus_arctos	0	0	0	0
	160	1	Ursus_maritimus	0	0	0	0
	161	1	Melursus_ursinus	0	0	0	0
	162	1	Tremarctos_ornatus	0	0	0	0
	163	84	Acinonyx_jubatus,Arctictis_binturong,Arctogalidia_trivirgata,Bdeogale_crassicauda,Caracal_aurata,Caracal_caracal,Civettictis_civetta,Crocuta_crocuta,Crossarchus_platycephalus,Cryptoprocta_ferox,Cynictis_penicillata,Cynogale_bennettii,Dinofelis_cristata,Eupleres_goudotii,FAM_62192,Felis_catus,Felis_chaus,Felis_margarita,Felis_nigripes,Felis_silvestris,Fossa_fossana,Galerella_pulverulenta,Galidia_e…	0	0	0	0
	164	1	Nandinia_binotata	0	0	0	0
	165	83	Acinonyx_jubatus,Arctictis_binturong,Arctogalidia_trivirgata,Bdeogale_crassicauda,Caracal_aurata,Caracal_caracal,Civettictis_civetta,Crocuta_crocuta,Crossarchus_platycephalus,Cryptoprocta_ferox,Cynictis_penicillata,Cynogale_bennettii,Dinofelis_cristata,Eupleres_goudotii,FAM_62192,Felis_catus,Felis_chaus,Felis_margarita,Felis_nigripes,Felis_silvestris,Fossa_fossana,Galerella_pulverulenta,Galidia_e…	0	0	0	0
	166	34	Arctictis_binturong,Arctogalidia_trivirgata,Bdeogale_crassicauda,Civettictis_civetta,Crocuta_crocuta,Crossarchus_platycephalus,Cryptoprocta_ferox,Cynictis_penicillata,Cynogale_bennettii,Eupleres_goudotii,Fossa_fossana,Galerella_pulverulenta,Galidia_elegans,Genetta_genetta,Genetta_tigrina,Herpestes_auropunctatus,Herpestes_edwardsii,Herpestes_fuscus,Herpestes_ichneumon,Hyaena_hyaena,Ichneumia_albic…	0	0	0	0
	167	20	Bdeogale_crassicauda,Crocuta_crocuta,Crossarchus_platycephalus,Cryptoprocta_ferox,Cynictis_penicillata,Eupleres_goudotii,Fossa_fossana,Galerella_pulverulenta,Galidia_elegans,Herpestes_auropunctatus,Herpestes_edwardsii,Herpestes_fuscus,Herpestes_ichneumon,Hyaena_hyaena,Ichneumia_albicauda,Mungos_mungo,Parahyaena_brunnea,Proteles_cristatus,Rhynchogale_melleri,Salanoia_concolor	0	0	0	0
	168	16	Bdeogale_crassicauda,Crossarchus_platycephalus,Cryptoprocta_ferox,Cynictis_penicillata,Eupleres_goudotii,Fossa_fossana,Galerella_pulverulenta,Galidia_elegans,Herpestes_auropunctatus,Herpestes_edwardsii,Herpestes_fuscus,Herpestes_ichneumon,Ichneumia_albicauda,Mungos_mungo,Rhynchogale_melleri,Salanoia_concolor	0	0	0	0
	169	11	Bdeogale_crassicauda,Crossarchus_platycephalus,Cynictis_penicillata,Galerella_pulverulenta,Herpestes_auropunctatus,Herpestes_edwardsii,Herpestes_fuscus,Herpestes_ichneumon,Ichneumia_albicauda,Mungos_mungo,Rhynchogale_melleri	0	0	0	0
	170	10	Bdeogale_crassicauda,Crossarchus_platycephalus,Cynictis_penicillata,Herpestes_auropunctatus,Herpestes_edwardsii,Herpestes_fuscus,Herpestes_ichneumon,Ichneumia_albicauda,Mungos_mungo,Rhynchogale_melleri	0	0	0	0
	171	2	Crossarchus_platycephalus,Mungos_mungo	0	0	0	0
	172	1	Mungos_mungo	0	0	0	0
	173	1	Crossarchus_platycephalus	0	0	0	0
	174	8	Bdeogale_crassicauda,Cynictis_penicillata,Herpestes_auropunctatus,Herpestes_edwardsii,Herpestes_fuscus,Herpestes_ichneumon,Ichneumia_albicauda,Rhynchogale_melleri	0	0	0	0
	175	6	Bdeogale_crassicauda,Cynictis_penicillata,Herpestes_auropunctatus,Herpestes_edwardsii,Herpestes_fuscus,Herpestes_ichneumon	0	0	0	0
	176	2	Bdeogale_crassicauda,Cynictis_penicillata	0	0	0	0
	177	1	Cynictis_penicillata	0	0	0	0
	178	1	Bdeogale_crassicauda	0	0	0	0
	179	4	Herpestes_auropunctatus,Herpestes_edwardsii,Herpestes_fuscus,Herpestes_ichneumon	0	0	0	0
	180	1	Herpestes_ichneumon	0	0	0	0
	181	3	Herpestes_auropunctatus,Herpestes_edwardsii,Herpestes_fuscus	0	0	0	0
	182	2	Herpestes_auropunctatus,Herpestes_edwardsii	0	0	0	0
	183	1	Herpestes_auropunctatus	0	0	0	0
	184	1	Herpestes_edwardsii	0	0	0	0
	185	1	Herpestes_fuscus	0	0	0	0
	186	2	Ichneumia_albicauda,Rhynchogale_melleri	0	0	0	0
	187	1	Ichneumia_albicauda	0	0	0	0
	188	1	Rhynchogale_melleri	0	0	0	0
	189	1	Galerella_pulverulenta	0	0	0	0
	190	5	Cryptoprocta_ferox,Eupleres_goudotii,Fossa_fossana,Galidia_elegans,Salanoia_concolor	0	0	0	0
	191	3	Cryptoprocta_ferox,Galidia_elegans,Salanoia_concolor	0	0	0	0
	192	1	Cryptoprocta_ferox	0	0	0	0
	193	2	Galidia_elegans,Salanoia_concolor	0	0	0	0
	194	1	Galidia_elegans	0	0	0	0
	195	1	Salanoia_concolor	0	0	0	0
	196	2	Eupleres_goudotii,Fossa_fossana	0	0	0	0
	197	1	Fossa_fossana	0	0	0	0
	198	1	Eupleres_goudotii	0	0	0	0
	199	4	Crocuta_crocuta,Hyaena_hyaena,Parahyaena_brunnea,Proteles_cristatus	0	0	0	0
	200	3	Crocuta_crocuta,Hyaena_hyaena,Parahyaena_brunnea	0	0	0	0
	201	1	Crocuta_crocuta	0	0	0	0
	202	2	Hyaena_hyaena,Parahyaena_brunnea	0	0	0	0
	203	1	Hyaena_hyaena	0	0	0	0
	204	1	Parahyaena_brunnea	0	0	0	0
	205	1	Proteles_cristatus	1	1	1	1	<-- branch-shift
	206	14	Arctictis_binturong,Arctogalidia_trivirgata,Civettictis_civetta,Cynogale_bennettii,Genetta_genetta,Genetta_tigrina,Macrogalidia_musschenbroekii,Paguma_larvata,Paradoxurus_hermaphroditus,Prionodon_linsang,Viverra_megaspila,Viverra_tangalunga,Viverra_zibetha,Viverricula_indica	0	0	0	0
	207	1	Prionodon_linsang	0	0	0	0
	208	13	Arctictis_binturong,Arctogalidia_trivirgata,Civettictis_civetta,Cynogale_bennettii,Genetta_genetta,Genetta_tigrina,Macrogalidia_musschenbroekii,Paguma_larvata,Paradoxurus_hermaphroditus,Viverra_megaspila,Viverra_tangalunga,Viverra_zibetha,Viverricula_indica	0	0	0	0
	209	6	Arctictis_binturong,Arctogalidia_trivirgata,Cynogale_bennettii,Macrogalidia_musschenbroekii,Paguma_larvata,Paradoxurus_hermaphroditus	0	0	0	0
	210	1	Cynogale_bennettii	0	0	0	0
	211	5	Arctictis_binturong,Arctogalidia_trivirgata,Macrogalidia_musschenbroekii,Paguma_larvata,Paradoxurus_hermaphroditus	0	0	0	0
	212	1	Arctogalidia_trivirgata	0	0	0	0
	213	4	Arctictis_binturong,Macrogalidia_musschenbroekii,Paguma_larvata,Paradoxurus_hermaphroditus	0	0	0	0
	214	3	Macrogalidia_musschenbroekii,Paguma_larvata,Paradoxurus_hermaphroditus	0	0	0	0
	215	2	Macrogalidia_musschenbroekii,Paradoxurus_hermaphroditus	0	0	0	0
	216	1	Paradoxurus_hermaphroditus	0	0	0	0
	217	1	Macrogalidia_musschenbroekii	0	0	0	0
	218	1	Paguma_larvata	0	0	0	0
	219	1	Arctictis_binturong	0	0	0	0
	220	7	Civettictis_civetta,Genetta_genetta,Genetta_tigrina,Viverra_megaspila,Viverra_tangalunga,Viverra_zibetha,Viverricula_indica	0	0	0	0
	221	2	Genetta_genetta,Genetta_tigrina	0	0	0	0
	222	1	Genetta_tigrina	0	0	0	0
	223	1	Genetta_genetta	0	0	0	0
	224	5	Civettictis_civetta,Viverra_megaspila,Viverra_tangalunga,Viverra_zibetha,Viverricula_indica	0	0	0	0
	225	4	Civettictis_civetta,Viverra_megaspila,Viverra_tangalunga,Viverra_zibetha	0	0	0	0
	226	3	Viverra_megaspila,Viverra_tangalunga,Viverra_zibetha	0	0	0	0
	227	1	Viverra_tangalunga	0	0	0	0
	228	2	Viverra_megaspila,Viverra_zibetha	0	0	0	0
	229	1	Viverra_zibetha	0	0	0	0
	230	1	Viverra_megaspila	0	0	0	0
	231	1	Civettictis_civetta	0	0	0	0
	232	1	Viverricula_indica	0	0	0	0
	233	49	Acinonyx_jubatus,Caracal_aurata,Caracal_caracal,Dinofelis_cristata,FAM_62192,Felis_catus,Felis_chaus,Felis_margarita,Felis_nigripes,Felis_silvestris,Homotherium_crusafonti,Homotherium_nestianus,Hyperailurictis_validus,Leopardus_colocolo,Leopardus_geoffroyi,Leopardus_guigna,Leopardus_pardalis,Leopardus_tigrinus,Leopardus_wiedii,Leptailurus_serval,Lynx_canadensis,Lynx_lynx,Lynx_pardinus,Lynx_rufus,…	0	0	0	0
	234	1	Proailurus_lemanensis	0	0	0	0
	235	48	Acinonyx_jubatus,Caracal_aurata,Caracal_caracal,Dinofelis_cristata,FAM_62192,Felis_catus,Felis_chaus,Felis_margarita,Felis_nigripes,Felis_silvestris,Homotherium_crusafonti,Homotherium_nestianus,Hyperailurictis_validus,Leopardus_colocolo,Leopardus_geoffroyi,Leopardus_guigna,Leopardus_pardalis,Leopardus_tigrinus,Leopardus_wiedii,Leptailurus_serval,Lynx_canadensis,Lynx_lynx,Lynx_pardinus,Lynx_rufus,…	0	0	0	0
	236	1	Hyperailurictis_validus	0	0	0	0
	237	47	Acinonyx_jubatus,Caracal_aurata,Caracal_caracal,Dinofelis_cristata,FAM_62192,Felis_catus,Felis_chaus,Felis_margarita,Felis_nigripes,Felis_silvestris,Homotherium_crusafonti,Homotherium_nestianus,Leopardus_colocolo,Leopardus_geoffroyi,Leopardus_guigna,Leopardus_pardalis,Leopardus_tigrinus,Leopardus_wiedii,Leptailurus_serval,Lynx_canadensis,Lynx_lynx,Lynx_pardinus,Lynx_rufus,Megantereon_falconeri,Me…	0	0	0	0
	238	7	Dinofelis_cristata,Homotherium_crusafonti,Homotherium_nestianus,Megantereon_falconeri,Metailurus_parvulus,Smilodon_fatalis,Xenosmilus_hodsonae	0	0	0	0
	239	1	Metailurus_parvulus	0	0	0	0
	240	6	Dinofelis_cristata,Homotherium_crusafonti,Homotherium_nestianus,Megantereon_falconeri,Smilodon_fatalis,Xenosmilus_hodsonae	0	0	0	0
	241	1	Dinofelis_cristata	0	0	0	0
	242	5	Homotherium_crusafonti,Homotherium_nestianus,Megantereon_falconeri,Smilodon_fatalis,Xenosmilus_hodsonae	0	0	0	0
	243	2	Megantereon_falconeri,Smilodon_fatalis	0	0	0	0
	244	1	Smilodon_fatalis	0	0	0	0
	245	1	Megantereon_falconeri	0	0	0	0
	246	3	Homotherium_crusafonti,Homotherium_nestianus,Xenosmilus_hodsonae	0	0	0	0
	247	1	Homotherium_nestianus	0	0	0	0
	248	2	Homotherium_crusafonti,Xenosmilus_hodsonae	0	0	0	0
	249	1	Xenosmilus_hodsonae	0	0	0	0
	250	1	Homotherium_crusafonti	0	0	0	0
	251	40	Acinonyx_jubatus,Caracal_aurata,Caracal_caracal,FAM_62192,Felis_catus,Felis_chaus,Felis_margarita,Felis_nigripes,Felis_silvestris,Leopardus_colocolo,Leopardus_geoffroyi,Leopardus_guigna,Leopardus_pardalis,Leopardus_tigrinus,Leopardus_wiedii,Leptailurus_serval,Lynx_canadensis,Lynx_lynx,Lynx_pardinus,Lynx_rufus,Miracinonyx_studeri,Neofelis_nebulosa,Otocolobus_manul,Panthera_atrox,Panthera_augusta,P…	0	0	0	0
	252	1	FAM_62192	0	0	0	0
	253	39	Acinonyx_jubatus,Caracal_aurata,Caracal_caracal,Felis_catus,Felis_chaus,Felis_margarita,Felis_nigripes,Felis_silvestris,Leopardus_colocolo,Leopardus_geoffroyi,Leopardus_guigna,Leopardus_pardalis,Leopardus_tigrinus,Leopardus_wiedii,Leptailurus_serval,Lynx_canadensis,Lynx_lynx,Lynx_pardinus,Lynx_rufus,Miracinonyx_studeri,Neofelis_nebulosa,Otocolobus_manul,Panthera_atrox,Panthera_augusta,Panthera_le…	0	0	0	0
	254	9	Neofelis_nebulosa,Panthera_atrox,Panthera_augusta,Panthera_leo,Panthera_onca,Panthera_pardus,Panthera_spelaea,Panthera_tigris,Panthera_uncia	0	0	0	0
	255	1	Neofelis_nebulosa	0	0	0	0
	256	8	Panthera_atrox,Panthera_augusta,Panthera_leo,Panthera_onca,Panthera_pardus,Panthera_spelaea,Panthera_tigris,Panthera_uncia	0	0	0	0
	257	2	Panthera_tigris,Panthera_uncia	0	0	0	0
	258	1	Panthera_tigris	0	0	0	0
	259	1	Panthera_uncia	0	0	0	0
	260	6	Panthera_atrox,Panthera_augusta,Panthera_leo,Panthera_onca,Panthera_pardus,Panthera_spelaea	0	0	0	0
	261	2	Panthera_augusta,Panthera_onca	1	1	0	0
	262	1	Panthera_augusta	1	1	0	0
	263	1	Panthera_onca	1	1	1	1	<-- branch-shift
	264	4	Panthera_atrox,Panthera_leo,Panthera_pardus,Panthera_spelaea	0	0	0	0
	265	1	Panthera_pardus	0	0	0	0
	266	3	Panthera_atrox,Panthera_leo,Panthera_spelaea	0	0	0	0
	267	1	Panthera_leo	0	0	0	0
	268	2	Panthera_atrox,Panthera_spelaea	0	0	0	0
	269	1	Panthera_spelaea	0	0	0	0
	270	1	Panthera_atrox	0	0	0	0
	271	30	Acinonyx_jubatus,Caracal_aurata,Caracal_caracal,Felis_catus,Felis_chaus,Felis_margarita,Felis_nigripes,Felis_silvestris,Leopardus_colocolo,Leopardus_geoffroyi,Leopardus_guigna,Leopardus_pardalis,Leopardus_tigrinus,Leopardus_wiedii,Leptailurus_serval,Lynx_canadensis,Lynx_lynx,Lynx_pardinus,Lynx_rufus,Miracinonyx_studeri,Otocolobus_manul,Pardofelis_badia,Pardofelis_marmorata,Pardofelis_temminckii,P…	0	0	0	0
	272	3	Pardofelis_badia,Pardofelis_marmorata,Pardofelis_temminckii	0	0	0	0
	273	1	Pardofelis_marmorata	0	0	0	0
	274	2	Pardofelis_badia,Pardofelis_temminckii	0	0	0	0
	275	1	Pardofelis_temminckii	0	0	0	0
	276	1	Pardofelis_badia	0	0	0	0
	277	27	Acinonyx_jubatus,Caracal_aurata,Caracal_caracal,Felis_catus,Felis_chaus,Felis_margarita,Felis_nigripes,Felis_silvestris,Leopardus_colocolo,Leopardus_geoffroyi,Leopardus_guigna,Leopardus_pardalis,Leopardus_tigrinus,Leopardus_wiedii,Leptailurus_serval,Lynx_canadensis,Lynx_lynx,Lynx_pardinus,Lynx_rufus,Miracinonyx_studeri,Otocolobus_manul,Prionailurus_bengalensis,Prionailurus_planiceps,Prionailurus_…	0	0	0	0
	278	3	Caracal_aurata,Caracal_caracal,Leptailurus_serval	0	0	0	0
	279	1	Leptailurus_serval	0	0	0	0
	280	2	Caracal_aurata,Caracal_caracal	0	0	0	0
	281	1	Caracal_aurata	0	0	0	0
	282	1	Caracal_caracal	0	0	0	0
	283	24	Acinonyx_jubatus,Felis_catus,Felis_chaus,Felis_margarita,Felis_nigripes,Felis_silvestris,Leopardus_colocolo,Leopardus_geoffroyi,Leopardus_guigna,Leopardus_pardalis,Leopardus_tigrinus,Leopardus_wiedii,Lynx_canadensis,Lynx_lynx,Lynx_pardinus,Lynx_rufus,Miracinonyx_studeri,Otocolobus_manul,Prionailurus_bengalensis,Prionailurus_planiceps,Prionailurus_rubiginosus,Prionailurus_viverrinus,Puma_concolor,…	0	0	0	0
	284	6	Leopardus_colocolo,Leopardus_geoffroyi,Leopardus_guigna,Leopardus_pardalis,Leopardus_tigrinus,Leopardus_wiedii	0	0	0	0
	285	2	Leopardus_pardalis,Leopardus_wiedii	0	0	0	0
	286	1	Leopardus_pardalis	0	0	0	0
	287	1	Leopardus_wiedii	0	0	0	0
	288	4	Leopardus_colocolo,Leopardus_geoffroyi,Leopardus_guigna,Leopardus_tigrinus	0	0	0	0
	289	1	Leopardus_colocolo	0	0	0	0
	290	3	Leopardus_geoffroyi,Leopardus_guigna,Leopardus_tigrinus	0	0	0	0
	291	1	Leopardus_tigrinus	0	0	0	0
	292	2	Leopardus_geoffroyi,Leopardus_guigna	0	0	0	0
	293	1	Leopardus_geoffroyi	0	0	0	0
	294	1	Leopardus_guigna	0	0	0	0
	295	18	Acinonyx_jubatus,Felis_catus,Felis_chaus,Felis_margarita,Felis_nigripes,Felis_silvestris,Lynx_canadensis,Lynx_lynx,Lynx_pardinus,Lynx_rufus,Miracinonyx_studeri,Otocolobus_manul,Prionailurus_bengalensis,Prionailurus_planiceps,Prionailurus_rubiginosus,Prionailurus_viverrinus,Puma_concolor,Puma_yagouaroundi	0	0	0	0
	296	4	Lynx_canadensis,Lynx_lynx,Lynx_pardinus,Lynx_rufus	0	0	0	0
	297	1	Lynx_rufus	0	0	0	0
	298	3	Lynx_canadensis,Lynx_lynx,Lynx_pardinus	0	0	0	0
	299	1	Lynx_canadensis	0	0	0	0
	300	2	Lynx_lynx,Lynx_pardinus	0	0	0	0
	301	1	Lynx_pardinus	0	0	0	0
	302	1	Lynx_lynx	0	0	0	0
	303	14	Acinonyx_jubatus,Felis_catus,Felis_chaus,Felis_margarita,Felis_nigripes,Felis_silvestris,Miracinonyx_studeri,Otocolobus_manul,Prionailurus_bengalensis,Prionailurus_planiceps,Prionailurus_rubiginosus,Prionailurus_viverrinus,Puma_concolor,Puma_yagouaroundi	0	0	0	0
	304	4	Acinonyx_jubatus,Miracinonyx_studeri,Puma_concolor,Puma_yagouaroundi	0	0	0	0
	305	1	Acinonyx_jubatus	0	0	0	0
	306	3	Miracinonyx_studeri,Puma_concolor,Puma_yagouaroundi	0	0	0	0
	307	1	Puma_yagouaroundi	0	0	0	0
	308	2	Miracinonyx_studeri,Puma_concolor	0	0	0	0
	309	1	Miracinonyx_studeri	0	0	0	0
	310	1	Puma_concolor	0	0	0	0
	311	10	Felis_catus,Felis_chaus,Felis_margarita,Felis_nigripes,Felis_silvestris,Otocolobus_manul,Prionailurus_bengalensis,Prionailurus_planiceps,Prionailurus_rubiginosus,Prionailurus_viverrinus	0	0	0	0
	312	5	Felis_catus,Felis_chaus,Felis_margarita,Felis_nigripes,Felis_silvestris	0	0	0	0
	313	1	Felis_chaus	0	0	0	0
	314	4	Felis_catus,Felis_margarita,Felis_nigripes,Felis_silvestris	0	0	0	0
	315	1	Felis_nigripes	0	0	0	0
	316	3	Felis_catus,Felis_margarita,Felis_silvestris	0	0	0	0
	317	1	Felis_margarita	0	0	0	0
	318	2	Felis_catus,Felis_silvestris	0	0	0	0
	319	1	Felis_catus	0	0	0	0
	320	1	Felis_silvestris	0	0	0	0
	321	5	Otocolobus_manul,Prionailurus_bengalensis,Prionailurus_planiceps,Prionailurus_rubiginosus,Prionailurus_viverrinus	0	0	0	0
	322	1	Otocolobus_manul	0	0	0	0
	323	4	Prionailurus_bengalensis,Prionailurus_planiceps,Prionailurus_rubiginosus,Prionailurus_viverrinus	0	0	0	0
	324	1	Prionailurus_rubiginosus	0	0	0	0
	325	3	Prionailurus_bengalensis,Prionailurus_planiceps,Prionailurus_viverrinus	0	0	0	0
	326	1	Prionailurus_planiceps	0	0	0	0
	327	2	Prionailurus_bengalensis,Prionailurus_viverrinus	0	0	0	0
	328	1	Prionailurus_bengalensis	0	0	0	0
	329	1	Prionailurus_viverrinus	0	0	0	0
	330	2	Sus_scrofa,Tayassu_pecari	0	0	0	0
	331	1	Tayassu_pecari	0	0	0	0
	332	1	Sus_scrofa	1	1	1	1	<-- branch-shift
	333	66	Artibeus_jamaicensis,Artibeus_lituratus,Carollia_castanea,Carollia_perspicillata,Centurio_senex,Chiroderma_villosum,Cynopterus_brachyotis,Desmodus_rotundus,Eidolon_helvum,Emballonura_monticola,Eptesicus_furinalis,Erophylla_sezekorni,Glossophaga_soricina,Hipposideros_bicolor,Hipposideros_cervinus,Hipposideros_diadema,Hipposideros_galeritus,Hipposideros_larvatus,Hipposideros_lylei,Hipposideros_ridl…	0	0	0	0
	334	19	Cynopterus_brachyotis,Eidolon_helvum,Hipposideros_bicolor,Hipposideros_cervinus,Hipposideros_diadema,Hipposideros_galeritus,Hipposideros_larvatus,Hipposideros_lylei,Hipposideros_ridleyi,Pteropus_poliocephalus,Pteropus_vampyrus,Rhinolophus_affinis,Rhinolophus_lepidus,Rhinolophus_luctus,Rhinolophus_robinsoni,Rhinolophus_sedulus,Rhinolophus_stheno,Rhinolophus_trifoliatus,Rousettus_aegyptiacus	0	0	0	0
	335	14	Hipposideros_bicolor,Hipposideros_cervinus,Hipposideros_diadema,Hipposideros_galeritus,Hipposideros_larvatus,Hipposideros_lylei,Hipposideros_ridleyi,Rhinolophus_affinis,Rhinolophus_lepidus,Rhinolophus_luctus,Rhinolophus_robinsoni,Rhinolophus_sedulus,Rhinolophus_stheno,Rhinolophus_trifoliatus	0	0	0	0
	336	7	Rhinolophus_affinis,Rhinolophus_lepidus,Rhinolophus_luctus,Rhinolophus_robinsoni,Rhinolophus_sedulus,Rhinolophus_stheno,Rhinolophus_trifoliatus	0	0	0	0
	337	6	Rhinolophus_affinis,Rhinolophus_lepidus,Rhinolophus_robinsoni,Rhinolophus_sedulus,Rhinolophus_stheno,Rhinolophus_trifoliatus	0	0	0	0
	338	5	Rhinolophus_affinis,Rhinolophus_lepidus,Rhinolophus_robinsoni,Rhinolophus_sedulus,Rhinolophus_stheno	0	0	0	0
	339	3	Rhinolophus_lepidus,Rhinolophus_robinsoni,Rhinolophus_sedulus	0	0	0	0
	340	2	Rhinolophus_robinsoni,Rhinolophus_sedulus	0	0	0	0
	341	1	Rhinolophus_robinsoni	0	0	0	0
	342	1	Rhinolophus_sedulus	0	0	0	0
	343	1	Rhinolophus_lepidus	0	0	0	0
	344	2	Rhinolophus_affinis,Rhinolophus_stheno	0	0	0	0
	345	1	Rhinolophus_stheno	0	0	0	0
	346	1	Rhinolophus_affinis	0	0	0	0
	347	1	Rhinolophus_trifoliatus	0	0	0	0
	348	1	Rhinolophus_luctus	0	0	0	0
	349	7	Hipposideros_bicolor,Hipposideros_cervinus,Hipposideros_diadema,Hipposideros_galeritus,Hipposideros_larvatus,Hipposideros_lylei,Hipposideros_ridleyi	0	0	0	0
	350	3	Hipposideros_cervinus,Hipposideros_galeritus,Hipposideros_ridleyi	0	0	0	0
	351	2	Hipposideros_cervinus,Hipposideros_galeritus	0	0	0	0
	352	1	Hipposideros_galeritus	0	0	0	0
	353	1	Hipposideros_cervinus	0	0	0	0
	354	1	Hipposideros_ridleyi	0	0	0	0
	355	4	Hipposideros_bicolor,Hipposideros_diadema,Hipposideros_larvatus,Hipposideros_lylei	0	0	0	0
	356	1	Hipposideros_diadema	0	0	0	0
	357	3	Hipposideros_bicolor,Hipposideros_larvatus,Hipposideros_lylei	0	0	0	0
	358	1	Hipposideros_bicolor	0	0	0	0
	359	2	Hipposideros_larvatus,Hipposideros_lylei	0	0	0	0
	360	1	Hipposideros_larvatus	0	0	0	0
	361	1	Hipposideros_lylei	0	0	0	0
	362	5	Cynopterus_brachyotis,Eidolon_helvum,Pteropus_poliocephalus,Pteropus_vampyrus,Rousettus_aegyptiacus	0	0	0	0
	363	1	Cynopterus_brachyotis	0	0	0	0
	364	4	Eidolon_helvum,Pteropus_poliocephalus,Pteropus_vampyrus,Rousettus_aegyptiacus	0	0	0	0
	365	2	Pteropus_poliocephalus,Pteropus_vampyrus	0	0	0	0
	366	1	Pteropus_vampyrus	0	0	0	0
	367	1	Pteropus_poliocephalus	0	0	0	0
	368	2	Eidolon_helvum,Rousettus_aegyptiacus	0	0	0	0
	369	1	Eidolon_helvum	0	0	0	0
	370	1	Rousettus_aegyptiacus	0	0	0	0
	371	47	Artibeus_jamaicensis,Artibeus_lituratus,Carollia_castanea,Carollia_perspicillata,Centurio_senex,Chiroderma_villosum,Desmodus_rotundus,Emballonura_monticola,Eptesicus_furinalis,Erophylla_sezekorni,Glossophaga_soricina,Kerivoula_intermedia,Kerivoula_papillosa,Kerivoula_pellucida,Lophostoma_brasiliense,Lophostoma_silvicolum,Micronycteris_brachyotis,Micronycteris_hirsuta,Micronycteris_microtis,Micron…	0	0	0	0
	372	3	Emballonura_monticola,Nycteris_tragata,Taphozous_melanopogon	0	0	0	0
	373	2	Emballonura_monticola,Taphozous_melanopogon	0	0	0	0
	374	1	Taphozous_melanopogon	0	0	0	0
	375	1	Emballonura_monticola	0	0	0	0
	376	1	Nycteris_tragata	0	0	0	0
	377	44	Artibeus_jamaicensis,Artibeus_lituratus,Carollia_castanea,Carollia_perspicillata,Centurio_senex,Chiroderma_villosum,Desmodus_rotundus,Eptesicus_furinalis,Erophylla_sezekorni,Glossophaga_soricina,Kerivoula_intermedia,Kerivoula_papillosa,Kerivoula_pellucida,Lophostoma_brasiliense,Lophostoma_silvicolum,Micronycteris_brachyotis,Micronycteris_hirsuta,Micronycteris_microtis,Micronycteris_minuta,Mimon_c…	0	0	0	0
	378	28	Artibeus_jamaicensis,Artibeus_lituratus,Carollia_castanea,Carollia_perspicillata,Centurio_senex,Chiroderma_villosum,Desmodus_rotundus,Erophylla_sezekorni,Glossophaga_soricina,Lophostoma_brasiliense,Lophostoma_silvicolum,Micronycteris_brachyotis,Micronycteris_hirsuta,Micronycteris_microtis,Micronycteris_minuta,Mimon_crenulatum,Monophyllus_redmani,Noctilio_albiventris,Noctilio_leporinus,Phyllostomu…	0	0	0	0
	379	2	Noctilio_albiventris,Noctilio_leporinus	0	0	0	0
	380	1	Noctilio_leporinus	0	0	0	0
	381	1	Noctilio_albiventris	0	0	0	0
	382	26	Artibeus_jamaicensis,Artibeus_lituratus,Carollia_castanea,Carollia_perspicillata,Centurio_senex,Chiroderma_villosum,Desmodus_rotundus,Erophylla_sezekorni,Glossophaga_soricina,Lophostoma_brasiliense,Lophostoma_silvicolum,Micronycteris_brachyotis,Micronycteris_hirsuta,Micronycteris_microtis,Micronycteris_minuta,Mimon_crenulatum,Monophyllus_redmani,Phyllostomus_discolor,Phyllostomus_elongatus,Phyllo…	0	0	0	0
	383	25	Artibeus_jamaicensis,Artibeus_lituratus,Carollia_castanea,Carollia_perspicillata,Centurio_senex,Chiroderma_villosum,Erophylla_sezekorni,Glossophaga_soricina,Lophostoma_brasiliense,Lophostoma_silvicolum,Micronycteris_brachyotis,Micronycteris_hirsuta,Micronycteris_microtis,Micronycteris_minuta,Mimon_crenulatum,Monophyllus_redmani,Phyllostomus_discolor,Phyllostomus_elongatus,Phyllostomus_hastatus,Pl…	0	0	0	0
	384	13	Artibeus_jamaicensis,Artibeus_lituratus,Carollia_castanea,Carollia_perspicillata,Centurio_senex,Chiroderma_villosum,Erophylla_sezekorni,Glossophaga_soricina,Monophyllus_redmani,Platyrrhinus_helleri,Platyrrhinus_lineatus,Sturnira_lilium,Uroderma_bilobatum	0	0	0	0
	385	10	Artibeus_jamaicensis,Artibeus_lituratus,Carollia_castanea,Carollia_perspicillata,Centurio_senex,Chiroderma_villosum,Platyrrhinus_helleri,Platyrrhinus_lineatus,Sturnira_lilium,Uroderma_bilobatum	0	0	0	0
	386	8	Artibeus_jamaicensis,Artibeus_lituratus,Centurio_senex,Chiroderma_villosum,Platyrrhinus_helleri,Platyrrhinus_lineatus,Sturnira_lilium,Uroderma_bilobatum	0	0	0	0
	387	1	Sturnira_lilium	0	0	0	0
	388	7	Artibeus_jamaicensis,Artibeus_lituratus,Centurio_senex,Chiroderma_villosum,Platyrrhinus_helleri,Platyrrhinus_lineatus,Uroderma_bilobatum	0	0	0	0
	389	3	Artibeus_jamaicensis,Artibeus_lituratus,Centurio_senex	0	0	0	0
	390	1	Centurio_senex	0	0	0	0
	391	2	Artibeus_jamaicensis,Artibeus_lituratus	0	0	0	0
	392	1	Artibeus_lituratus	0	0	0	0
	393	1	Artibeus_jamaicensis	0	0	0	0
	394	4	Chiroderma_villosum,Platyrrhinus_helleri,Platyrrhinus_lineatus,Uroderma_bilobatum	0	0	0	0
	395	3	Platyrrhinus_helleri,Platyrrhinus_lineatus,Uroderma_bilobatum	0	0	0	0
	396	2	Platyrrhinus_helleri,Platyrrhinus_lineatus	0	0	0	0
	397	1	Platyrrhinus_lineatus	0	0	0	0
	398	1	Platyrrhinus_helleri	0	0	0	0
	399	1	Uroderma_bilobatum	0	0	0	0
	400	1	Chiroderma_villosum	0	0	0	0
	401	2	Carollia_castanea,Carollia_perspicillata	0	0	0	0
	402	1	Carollia_perspicillata	0	0	0	0
	403	1	Carollia_castanea	0	0	0	0
	404	3	Erophylla_sezekorni,Glossophaga_soricina,Monophyllus_redmani	0	0	0	0
	405	2	Glossophaga_soricina,Monophyllus_redmani	0	0	0	0
	406	1	Glossophaga_soricina	0	0	0	0
	407	1	Monophyllus_redmani	0	0	0	0
	408	1	Erophylla_sezekorni	0	0	0	0
	409	12	Lophostoma_brasiliense,Lophostoma_silvicolum,Micronycteris_brachyotis,Micronycteris_hirsuta,Micronycteris_microtis,Micronycteris_minuta,Mimon_crenulatum,Phyllostomus_discolor,Phyllostomus_elongatus,Phyllostomus_hastatus,Tonatia_saurophila,Trachops_cirrhosus	0	0	0	0
	410	8	Lophostoma_brasiliense,Lophostoma_silvicolum,Mimon_crenulatum,Phyllostomus_discolor,Phyllostomus_elongatus,Phyllostomus_hastatus,Tonatia_saurophila,Trachops_cirrhosus	0	0	0	0
	411	7	Lophostoma_brasiliense,Lophostoma_silvicolum,Mimon_crenulatum,Phyllostomus_discolor,Phyllostomus_elongatus,Phyllostomus_hastatus,Tonatia_saurophila	0	0	0	0
	412	6	Lophostoma_brasiliense,Lophostoma_silvicolum,Mimon_crenulatum,Phyllostomus_discolor,Phyllostomus_elongatus,Phyllostomus_hastatus	0	0	0	0
	413	2	Lophostoma_brasiliense,Lophostoma_silvicolum	0	0	0	0
	414	1	Lophostoma_silvicolum	0	0	0	0
	415	1	Lophostoma_brasiliense	0	0	0	0
	416	4	Mimon_crenulatum,Phyllostomus_discolor,Phyllostomus_elongatus,Phyllostomus_hastatus	0	0	0	0
	417	3	Phyllostomus_discolor,Phyllostomus_elongatus,Phyllostomus_hastatus	0	0	0	0
	418	2	Phyllostomus_elongatus,Phyllostomus_hastatus	0	0	0	0
	419	1	Phyllostomus_hastatus	0	0	0	0
	420	1	Phyllostomus_elongatus	0	0	0	0
	421	1	Phyllostomus_discolor	0	0	0	0
	422	1	Mimon_crenulatum	0	0	0	0
	423	1	Tonatia_saurophila	0	0	0	0
	424	1	Trachops_cirrhosus	0	0	0	0
	425	4	Micronycteris_brachyotis,Micronycteris_hirsuta,Micronycteris_microtis,Micronycteris_minuta	0	0	0	0
	426	3	Micronycteris_hirsuta,Micronycteris_microtis,Micronycteris_minuta	0	0	0	0
	427	2	Micronycteris_hirsuta,Micronycteris_microtis	0	0	0	0
	428	1	Micronycteris_microtis	0	0	0	0
	429	1	Micronycteris_hirsuta	0	0	0	0
	430	1	Micronycteris_minuta	0	0	0	0
	431	1	Micronycteris_brachyotis	0	0	0	0
	432	1	Desmodus_rotundus	0	0	0	0
	433	16	Eptesicus_furinalis,Kerivoula_intermedia,Kerivoula_papillosa,Kerivoula_pellucida,Molossus_sinaloae,Mops_mops,Murina_aenea,Murina_cyclotis,Murina_suilla,Myotis_albescens,Myotis_ater,Myotis_nigricans,Myotis_ridleyi,Myotis_simus,Phoniscus_jagorii,Scotophilus_kuhlii	0	0	0	0
	434	14	Eptesicus_furinalis,Kerivoula_intermedia,Kerivoula_papillosa,Kerivoula_pellucida,Murina_aenea,Murina_cyclotis,Murina_suilla,Myotis_albescens,Myotis_ater,Myotis_nigricans,Myotis_ridleyi,Myotis_simus,Phoniscus_jagorii,Scotophilus_kuhlii	0	0	0	0
	435	1	Scotophilus_kuhlii	0	0	0	0
	436	13	Eptesicus_furinalis,Kerivoula_intermedia,Kerivoula_papillosa,Kerivoula_pellucida,Murina_aenea,Murina_cyclotis,Murina_suilla,Myotis_albescens,Myotis_ater,Myotis_nigricans,Myotis_ridleyi,Myotis_simus,Phoniscus_jagorii	0	0	0	0
	437	7	Kerivoula_intermedia,Kerivoula_papillosa,Kerivoula_pellucida,Murina_aenea,Murina_cyclotis,Murina_suilla,Phoniscus_jagorii	0	0	0	0
	438	4	Kerivoula_intermedia,Kerivoula_papillosa,Kerivoula_pellucida,Phoniscus_jagorii	0	0	0	0
	439	3	Kerivoula_intermedia,Kerivoula_papillosa,Kerivoula_pellucida	0	0	0	0
	440	1	Kerivoula_pellucida	0	0	0	0
	441	2	Kerivoula_intermedia,Kerivoula_papillosa	0	0	0	0
	442	1	Kerivoula_intermedia	0	1	0	0
	443	1	Kerivoula_papillosa	0	0	0	0
	444	1	Phoniscus_jagorii	0	0	0	0
	445	3	Murina_aenea,Murina_cyclotis,Murina_suilla	0	0	0	0
	446	2	Murina_aenea,Murina_cyclotis	0	0	0	0
	447	1	Murina_aenea	0	0	0	0
	448	1	Murina_cyclotis	0	0	0	0
	449	1	Murina_suilla	0	0	0	0
	450	6	Eptesicus_furinalis,Myotis_albescens,Myotis_ater,Myotis_nigricans,Myotis_ridleyi,Myotis_simus	0	0	0	0
	451	5	Myotis_albescens,Myotis_ater,Myotis_nigricans,Myotis_ridleyi,Myotis_simus	0	0	0	0
	452	2	Myotis_ater,Myotis_ridleyi	0	0	0	0
	453	1	Myotis_ater	0	0	0	0
	454	1	Myotis_ridleyi	0	0	0	0
	455	3	Myotis_albescens,Myotis_nigricans,Myotis_simus	0	0	0	0
	456	2	Myotis_albescens,Myotis_nigricans	0	0	0	0
	457	1	Myotis_nigricans	0	0	0	0
	458	1	Myotis_albescens	0	0	0	0
	459	1	Myotis_simus	0	0	0	0
	460	1	Eptesicus_furinalis	0	0	0	0
	461	2	Molossus_sinaloae,Mops_mops	0	0	0	0
	462	1	Molossus_sinaloae	0	0	0	0
	463	1	Mops_mops	0	0	0	0
	464	55	Alouatta_guariba,Aotus_trivirgatus,Ateles_geoffroyi,Australopithecus_afarensis,Australopithecus_africanus,Australopithecus_anamensis,Avahi_laniger,Callicebus_torquatus,Callimico_goeldii,Callithrix_argentata,Callithrix_jacchus,Cavia_porcellus,Cebus_olivaceus,Cheirogaleus_medius,Colobus_polykomos,Eulemur_coronatus,Eulemur_mongoz,Eulemur_rubriventer,Galago_moholi,Gorilla_gorilla,Hapalemur_griseus,Ho…	0	0	0	0
	465	4	Cavia_porcellus,Oryctolagus_cuniculus,Rattus_norvegicus,Sciurus_carolinensis	0	0	0	0
	466	3	Cavia_porcellus,Rattus_norvegicus,Sciurus_carolinensis	0	0	0	0
	467	1	Cavia_porcellus	0	0	0	0
	468	2	Rattus_norvegicus,Sciurus_carolinensis	0	0	0	0
	469	1	Rattus_norvegicus	0	0	0	0
	470	1	Sciurus_carolinensis	0	0	0	0
	471	1	Oryctolagus_cuniculus	0	0	0	0
	472	51	Alouatta_guariba,Aotus_trivirgatus,Ateles_geoffroyi,Australopithecus_afarensis,Australopithecus_africanus,Australopithecus_anamensis,Avahi_laniger,Callicebus_torquatus,Callimico_goeldii,Callithrix_argentata,Callithrix_jacchus,Cebus_olivaceus,Cheirogaleus_medius,Colobus_polykomos,Eulemur_coronatus,Eulemur_mongoz,Eulemur_rubriventer,Galago_moholi,Gorilla_gorilla,Hapalemur_griseus,Homo_erectus,Homo_…	0	0	0	0
	473	32	Alouatta_guariba,Aotus_trivirgatus,Ateles_geoffroyi,Australopithecus_afarensis,Australopithecus_africanus,Australopithecus_anamensis,Callicebus_torquatus,Callimico_goeldii,Callithrix_argentata,Callithrix_jacchus,Cebus_olivaceus,Colobus_polykomos,Gorilla_gorilla,Homo_erectus,Homo_ergaster,Homo_habilis,Homo_heidelbergensis,Homo_neanderthalensis,Homo_sapiens,Hylobates_lar,Lophocebus_albigena,Macaca_…	0	0	0	0
	474	1	Tarsius_syrichta	0	0	0	0
	475	31	Alouatta_guariba,Aotus_trivirgatus,Ateles_geoffroyi,Australopithecus_afarensis,Australopithecus_africanus,Australopithecus_anamensis,Callicebus_torquatus,Callimico_goeldii,Callithrix_argentata,Callithrix_jacchus,Cebus_olivaceus,Colobus_polykomos,Gorilla_gorilla,Homo_erectus,Homo_ergaster,Homo_habilis,Homo_heidelbergensis,Homo_neanderthalensis,Homo_sapiens,Hylobates_lar,Lophocebus_albigena,Macaca_…	0	1	0	0
	476	21	Australopithecus_afarensis,Australopithecus_africanus,Australopithecus_anamensis,Colobus_polykomos,Gorilla_gorilla,Homo_erectus,Homo_ergaster,Homo_habilis,Homo_heidelbergensis,Homo_neanderthalensis,Homo_sapiens,Hylobates_lar,Lophocebus_albigena,Macaca_fascicularis,Pan_paniscus,Pan_troglodytes,Paranthropus_boisei,Paranthropus_robustus,Piliocolobus_rufomitratus,Pongo_pygmaeus,Symphalangus_syndactyl…	1	1	1	1	<-- clade-shift; anthropoids
	477	17	Australopithecus_afarensis,Australopithecus_africanus,Australopithecus_anamensis,Gorilla_gorilla,Homo_erectus,Homo_ergaster,Homo_habilis,Homo_heidelbergensis,Homo_neanderthalensis,Homo_sapiens,Hylobates_lar,Pan_paniscus,Pan_troglodytes,Paranthropus_boisei,Paranthropus_robustus,Pongo_pygmaeus,Symphalangus_syndactylus	1	1	1	1
	478	15	Australopithecus_afarensis,Australopithecus_africanus,Australopithecus_anamensis,Gorilla_gorilla,Homo_erectus,Homo_ergaster,Homo_habilis,Homo_heidelbergensis,Homo_neanderthalensis,Homo_sapiens,Pan_paniscus,Pan_troglodytes,Paranthropus_boisei,Paranthropus_robustus,Pongo_pygmaeus	1	1	1	1
	479	1	Pongo_pygmaeus	1	1	1	1
	480	14	Australopithecus_afarensis,Australopithecus_africanus,Australopithecus_anamensis,Gorilla_gorilla,Homo_erectus,Homo_ergaster,Homo_habilis,Homo_heidelbergensis,Homo_neanderthalensis,Homo_sapiens,Pan_paniscus,Pan_troglodytes,Paranthropus_boisei,Paranthropus_robustus	1	1	1	1
	481	1	Gorilla_gorilla	1	1	1	1
	482	13	Australopithecus_afarensis,Australopithecus_africanus,Australopithecus_anamensis,Homo_erectus,Homo_ergaster,Homo_habilis,Homo_heidelbergensis,Homo_neanderthalensis,Homo_sapiens,Pan_paniscus,Pan_troglodytes,Paranthropus_boisei,Paranthropus_robustus	1	1	1	1
	483	2	Pan_paniscus,Pan_troglodytes	1	1	1	1
	484	1	Pan_troglodytes	1	1	1	1
	485	1	Pan_paniscus	1	1	1	1
	486	11	Australopithecus_afarensis,Australopithecus_africanus,Australopithecus_anamensis,Homo_erectus,Homo_ergaster,Homo_habilis,Homo_heidelbergensis,Homo_neanderthalensis,Homo_sapiens,Paranthropus_boisei,Paranthropus_robustus	1	1	1	1
	487	1	Australopithecus_anamensis	1	1	1	1
	488	10	Australopithecus_afarensis,Australopithecus_africanus,Homo_erectus,Homo_ergaster,Homo_habilis,Homo_heidelbergensis,Homo_neanderthalensis,Homo_sapiens,Paranthropus_boisei,Paranthropus_robustus	1	1	1	1	<-- clade-shift; homonins
	489	9	Australopithecus_africanus,Homo_erectus,Homo_ergaster,Homo_habilis,Homo_heidelbergensis,Homo_neanderthalensis,Homo_sapiens,Paranthropus_boisei,Paranthropus_robustus	1	1	1	1
	490	2	Paranthropus_boisei,Paranthropus_robustus	1	1	1	1
	491	1	Paranthropus_boisei	1	1	1	1
	492	1	Paranthropus_robustus	1	1	1	1
	493	7	Australopithecus_africanus,Homo_erectus,Homo_ergaster,Homo_habilis,Homo_heidelbergensis,Homo_neanderthalensis,Homo_sapiens	1	1	1	1
	494	1	Australopithecus_africanus	1	1	1	1
	495	6	Homo_erectus,Homo_ergaster,Homo_habilis,Homo_heidelbergensis,Homo_neanderthalensis,Homo_sapiens	1	1	1	1
	496	1	Homo_habilis	1	1	1	1
	497	5	Homo_erectus,Homo_ergaster,Homo_heidelbergensis,Homo_neanderthalensis,Homo_sapiens	1	1	1	1
	498	1	Homo_ergaster	1	1	1	1
	499	4	Homo_erectus,Homo_heidelbergensis,Homo_neanderthalensis,Homo_sapiens	1	1	1	1
	500	3	Homo_heidelbergensis,Homo_neanderthalensis,Homo_sapiens	1	1	1	1
	501	1	Homo_sapiens	1	1	1	1
	502	2	Homo_heidelbergensis,Homo_neanderthalensis	1	1	1	1
	503	1	Homo_heidelbergensis	1	1	1	1
	504	1	Homo_neanderthalensis	1	1	1	1
	505	1	Homo_erectus	1	1	1	1
	506	1	Australopithecus_afarensis	1	1	1	1
	507	2	Hylobates_lar,Symphalangus_syndactylus	1	1	1	1
	508	1	Hylobates_lar	1	1	1	1
	509	1	Symphalangus_syndactylus	1	1	1	1
	510	4	Colobus_polykomos,Lophocebus_albigena,Macaca_fascicularis,Piliocolobus_rufomitratus	1	1	1	1
	511	2	Colobus_polykomos,Piliocolobus_rufomitratus	1	1	1	1
	512	1	Piliocolobus_rufomitratus	1	1	1	1
	513	1	Colobus_polykomos	1	1	1	1
	514	2	Lophocebus_albigena,Macaca_fascicularis	1	1	1	1
	515	1	Lophocebus_albigena	1	1	1	1
	516	1	Macaca_fascicularis	1	1	1	1
	517	10	Alouatta_guariba,Aotus_trivirgatus,Ateles_geoffroyi,Callicebus_torquatus,Callimico_goeldii,Callithrix_argentata,Callithrix_jacchus,Cebus_olivaceus,Saguinus_fuscicollis,Saimiri_sciureus	1	1	1	1
	518	1	Callicebus_torquatus	1	1	1	1
	519	9	Alouatta_guariba,Aotus_trivirgatus,Ateles_geoffroyi,Callimico_goeldii,Callithrix_argentata,Callithrix_jacchus,Cebus_olivaceus,Saguinus_fuscicollis,Saimiri_sciureus	1	1	1	1
	520	7	Aotus_trivirgatus,Callimico_goeldii,Callithrix_argentata,Callithrix_jacchus,Cebus_olivaceus,Saguinus_fuscicollis,Saimiri_sciureus	1	1	1	1
	521	5	Aotus_trivirgatus,Callimico_goeldii,Callithrix_argentata,Callithrix_jacchus,Saguinus_fuscicollis	1	1	1	1
	522	4	Callimico_goeldii,Callithrix_argentata,Callithrix_jacchus,Saguinus_fuscicollis	1	1	1	1
	523	1	Saguinus_fuscicollis	1	1	1	1
	524	3	Callimico_goeldii,Callithrix_argentata,Callithrix_jacchus	1	1	1	1
	525	2	Callithrix_argentata,Callithrix_jacchus	1	1	1	1
	526	1	Callithrix_jacchus	1	1	1	1
	527	1	Callithrix_argentata	1	1	1	1
	528	1	Callimico_goeldii	1	1	1	1
	529	1	Aotus_trivirgatus	1	1	1	1
	530	2	Cebus_olivaceus,Saimiri_sciureus	1	1	1	1
	531	1	Cebus_olivaceus	1	1	1	1
	532	1	Saimiri_sciureus	1	1	1	1
	533	2	Alouatta_guariba,Ateles_geoffroyi	1	1	1	1
	534	1	Ateles_geoffroyi	1	1	1	1
	535	1	Alouatta_guariba	1	1	1	1
	536	19	Avahi_laniger,Cheirogaleus_medius,Eulemur_coronatus,Eulemur_mongoz,Eulemur_rubriventer,Galago_moholi,Hapalemur_griseus,Lemur_catta,Lepilemur_leucopus,Microcebus_murinus,Mirza_coquereli,Nycticebus_coucang,Nycticebus_pygmaeus,Otolemur_crassicaudatus,Perodicticus_potto,Propithecus_coquereli,Propithecus_diadema,Propithecus_tattersalli,Varecia_rubra	0	0	0	0
	537	14	Avahi_laniger,Cheirogaleus_medius,Eulemur_coronatus,Eulemur_mongoz,Eulemur_rubriventer,Hapalemur_griseus,Lemur_catta,Lepilemur_leucopus,Microcebus_murinus,Mirza_coquereli,Propithecus_coquereli,Propithecus_diadema,Propithecus_tattersalli,Varecia_rubra	0	0	0	0
	538	8	Avahi_laniger,Cheirogaleus_medius,Lepilemur_leucopus,Microcebus_murinus,Mirza_coquereli,Propithecus_coquereli,Propithecus_diadema,Propithecus_tattersalli	0	0	0	0
	539	4	Avahi_laniger,Propithecus_coquereli,Propithecus_diadema,Propithecus_tattersalli	0	0	0	0
	540	3	Propithecus_coquereli,Propithecus_diadema,Propithecus_tattersalli	0	0	0	0
	541	2	Propithecus_coquereli,Propithecus_tattersalli	0	0	0	0
	542	1	Propithecus_tattersalli	0	0	0	0
	543	1	Propithecus_coquereli	0	0	0	0
	544	1	Propithecus_diadema	0	0	0	0
	545	1	Avahi_laniger	0	0	0	0
	546	4	Cheirogaleus_medius,Lepilemur_leucopus,Microcebus_murinus,Mirza_coquereli	0	0	0	0
	547	1	Lepilemur_leucopus	0	0	0	0
	548	3	Cheirogaleus_medius,Microcebus_murinus,Mirza_coquereli	0	0	0	0
	549	2	Microcebus_murinus,Mirza_coquereli	0	0	0	0
	550	1	Mirza_coquereli	0	0	0	0
	551	1	Microcebus_murinus	1	1	0	0
	552	1	Cheirogaleus_medius	0	0	0	0
	553	6	Eulemur_coronatus,Eulemur_mongoz,Eulemur_rubriventer,Hapalemur_griseus,Lemur_catta,Varecia_rubra	0	0	0	0
	554	1	Varecia_rubra	0	0	0	0
	555	5	Eulemur_coronatus,Eulemur_mongoz,Eulemur_rubriventer,Hapalemur_griseus,Lemur_catta	0	0	0	0
	556	2	Hapalemur_griseus,Lemur_catta	0	0	0	0
	557	1	Lemur_catta	0	0	0	0
	558	1	Hapalemur_griseus	0	0	0	0
	559	3	Eulemur_coronatus,Eulemur_mongoz,Eulemur_rubriventer	0	0	0	0
	560	1	Eulemur_rubriventer	0	0	0	0
	561	2	Eulemur_coronatus,Eulemur_mongoz	0	0	0	0
	562	1	Eulemur_mongoz	0	0	0	0
	563	1	Eulemur_coronatus	0	0	0	0
	564	5	Galago_moholi,Nycticebus_coucang,Nycticebus_pygmaeus,Otolemur_crassicaudatus,Perodicticus_potto	0	0	0	0
	565	3	Nycticebus_coucang,Nycticebus_pygmaeus,Perodicticus_potto	0	0	0	0
	566	1	Perodicticus_potto	0	0	0	0
	567	2	Nycticebus_coucang,Nycticebus_pygmaeus	0	0	0	0
	568	1	Nycticebus_pygmaeus	0	0	0	0
	569	1	Nycticebus_coucang	0	0	0	0
	570	2	Galago_moholi,Otolemur_crassicaudatus	0	0	0	0
	571	1	Otolemur_crassicaudatus	0	0	0	0
	572	1	Galago_moholi	0	0	0	0
	573	9	Dasyurus_hallucatus,Dasyurus_maculatus,Dasyurus_viverrinus,Didelphis_virginiana,Didelphodon_vorax,Monodelphis_domestica,Nimbacinus_dicksoni,Sarcophilus_harrisii,Thylacinus_cynocephalus	0	0	0	0
	574	8	Dasyurus_hallucatus,Dasyurus_maculatus,Dasyurus_viverrinus,Didelphis_virginiana,Monodelphis_domestica,Nimbacinus_dicksoni,Sarcophilus_harrisii,Thylacinus_cynocephalus	0	0	0	0
	575	2	Didelphis_virginiana,Monodelphis_domestica	0	0	0	0
	576	1	Monodelphis_domestica	0	0	0	0
	577	1	Didelphis_virginiana	0	0	0	0
	578	6	Dasyurus_hallucatus,Dasyurus_maculatus,Dasyurus_viverrinus,Nimbacinus_dicksoni,Sarcophilus_harrisii,Thylacinus_cynocephalus	0	0	0	0
	579	4	Dasyurus_hallucatus,Dasyurus_maculatus,Dasyurus_viverrinus,Sarcophilus_harrisii	0	0	0	0
	580	3	Dasyurus_hallucatus,Dasyurus_maculatus,Dasyurus_viverrinus	0	0	0	0
	581	1	Dasyurus_hallucatus	0	0	0	0
	582	2	Dasyurus_maculatus,Dasyurus_viverrinus	0	0	0	0
	583	1	Dasyurus_viverrinus	0	0	0	0
	584	1	Dasyurus_maculatus	0	0	0	0
	585	1	Sarcophilus_harrisii	0	0	0	0
	586	2	Nimbacinus_dicksoni,Thylacinus_cynocephalus	0	0	0	0
	587	1	Thylacinus_cynocephalus	0	0	0	0
	588	1	Nimbacinus_dicksoni	0	0	0	0
	589	1	Didelphodon_vorax	0	0	0	0
	590	139	Accipiter_cooperii,Accipiter_striatus,Alligator_mississippiensis,Alligator_sinensis,Allosaurus_fragilis,Amadina_erythrocephala,Amadina_fasciata,Anolis_chloris,Anolis_cristatellus,Anolis_distichus,Anolis_equestris,Anolis_garmani,Anolis_gundlachi,Anolis_limifrons,Anolis_oxylophus,Anolis_pulchellus,Anolis_sheplani,Anolis_valencienni,Apalone_ferox,Archaeopteryx_lithographica,Batagur_borneoensis,Brant…	0	0	0	0
	591	115	Accipiter_cooperii,Accipiter_striatus,Alligator_mississippiensis,Alligator_sinensis,Allosaurus_fragilis,Amadina_erythrocephala,Amadina_fasciata,Apalone_ferox,Archaeopteryx_lithographica,Batagur_borneoensis,Branta_canadensis,Buteo_buteo,Cactospiza_pallida,Caiman_crocodilus,Caiman_latirostris,Caiman_yacare,Camarhynchus_parvulus,Camarhynchus_psittacula,Carduelis_chloris,Carduelis_flammea,Carduelis_s…	0	0	0	0
	592	100	Accipiter_cooperii,Accipiter_striatus,Alligator_mississippiensis,Alligator_sinensis,Allosaurus_fragilis,Amadina_erythrocephala,Amadina_fasciata,Archaeopteryx_lithographica,Branta_canadensis,Buteo_buteo,Cactospiza_pallida,Caiman_crocodilus,Caiman_latirostris,Caiman_yacare,Camarhynchus_parvulus,Camarhynchus_psittacula,Carduelis_chloris,Carduelis_flammea,Carduelis_sinica,Carduelis_spinus,Cariama_cri…	0	0	0	0
	593	99	Accipiter_cooperii,Accipiter_striatus,Alligator_mississippiensis,Alligator_sinensis,Allosaurus_fragilis,Amadina_erythrocephala,Amadina_fasciata,Archaeopteryx_lithographica,Branta_canadensis,Buteo_buteo,Cactospiza_pallida,Caiman_crocodilus,Caiman_latirostris,Caiman_yacare,Camarhynchus_parvulus,Camarhynchus_psittacula,Carduelis_chloris,Carduelis_flammea,Carduelis_sinica,Carduelis_spinus,Cariama_cri…	0	0	0	0
	594	26	Alligator_mississippiensis,Alligator_sinensis,Caiman_crocodilus,Caiman_latirostris,Caiman_yacare,Crocodylus_acutus,Crocodylus_intermedius,Crocodylus_johnsoni,Crocodylus_mindorensis,Crocodylus_moreletii,Crocodylus_niloticus,Crocodylus_novaeguineae,Crocodylus_palustris,Crocodylus_porosus,Crocodylus_rhombifer,Crocodylus_siamensis,Gavialis_gangeticus,Mecistops_cataphractus,Melanosuchus_niger,Ornithos…	0	0	0	0
	595	25	Alligator_mississippiensis,Alligator_sinensis,Caiman_crocodilus,Caiman_latirostris,Caiman_yacare,Crocodylus_acutus,Crocodylus_intermedius,Crocodylus_johnsoni,Crocodylus_mindorensis,Crocodylus_moreletii,Crocodylus_niloticus,Crocodylus_novaeguineae,Crocodylus_palustris,Crocodylus_porosus,Crocodylus_rhombifer,Crocodylus_siamensis,Gavialis_gangeticus,Mecistops_cataphractus,Melanosuchus_niger,Ornithos…	0	0	0	0
	596	23	Alligator_mississippiensis,Alligator_sinensis,Caiman_crocodilus,Caiman_latirostris,Caiman_yacare,Crocodylus_acutus,Crocodylus_intermedius,Crocodylus_johnsoni,Crocodylus_mindorensis,Crocodylus_moreletii,Crocodylus_niloticus,Crocodylus_novaeguineae,Crocodylus_palustris,Crocodylus_porosus,Crocodylus_rhombifer,Crocodylus_siamensis,Gavialis_gangeticus,Mecistops_cataphractus,Melanosuchus_niger,Osteolae…	0	0	0	0
	597	15	Crocodylus_acutus,Crocodylus_intermedius,Crocodylus_johnsoni,Crocodylus_mindorensis,Crocodylus_moreletii,Crocodylus_niloticus,Crocodylus_novaeguineae,Crocodylus_palustris,Crocodylus_porosus,Crocodylus_rhombifer,Crocodylus_siamensis,Gavialis_gangeticus,Mecistops_cataphractus,Osteolaemus_tetraspis,Tomistoma_schlegelii	0	0	0	0
	598	2	Gavialis_gangeticus,Tomistoma_schlegelii	0	0	0	0
	599	1	Tomistoma_schlegelii	0	0	0	0
	600	1	Gavialis_gangeticus	0	0	0	0
	601	13	Crocodylus_acutus,Crocodylus_intermedius,Crocodylus_johnsoni,Crocodylus_mindorensis,Crocodylus_moreletii,Crocodylus_niloticus,Crocodylus_novaeguineae,Crocodylus_palustris,Crocodylus_porosus,Crocodylus_rhombifer,Crocodylus_siamensis,Mecistops_cataphractus,Osteolaemus_tetraspis	0	0	0	0
	602	11	Crocodylus_acutus,Crocodylus_intermedius,Crocodylus_johnsoni,Crocodylus_mindorensis,Crocodylus_moreletii,Crocodylus_niloticus,Crocodylus_novaeguineae,Crocodylus_palustris,Crocodylus_porosus,Crocodylus_rhombifer,Crocodylus_siamensis	0	0	0	0
	603	8	Crocodylus_acutus,Crocodylus_intermedius,Crocodylus_moreletii,Crocodylus_niloticus,Crocodylus_palustris,Crocodylus_porosus,Crocodylus_rhombifer,Crocodylus_siamensis	0	0	0	0
	604	5	Crocodylus_acutus,Crocodylus_intermedius,Crocodylus_moreletii,Crocodylus_niloticus,Crocodylus_rhombifer	0	0	0	0
	605	4	Crocodylus_acutus,Crocodylus_intermedius,Crocodylus_moreletii,Crocodylus_rhombifer	0	0	0	0
	606	2	Crocodylus_moreletii,Crocodylus_rhombifer	0	0	0	0
	607	1	Crocodylus_moreletii	0	0	0	0
	608	1	Crocodylus_rhombifer	0	0	0	0
	609	2	Crocodylus_acutus,Crocodylus_intermedius	0	0	0	0
	610	1	Crocodylus_acutus	0	0	0	0
	611	1	Crocodylus_intermedius	0	0	0	0
	612	1	Crocodylus_niloticus	0	0	0	0
	613	3	Crocodylus_palustris,Crocodylus_porosus,Crocodylus_siamensis	0	0	0	0
	614	2	Crocodylus_palustris,Crocodylus_siamensis	0	0	0	0
	615	1	Crocodylus_siamensis	0	0	0	0
	616	1	Crocodylus_palustris	0	0	0	0
	617	1	Crocodylus_porosus	0	0	0	0
	618	3	Crocodylus_johnsoni,Crocodylus_mindorensis,Crocodylus_novaeguineae	0	0	0	0
	619	2	Crocodylus_mindorensis,Crocodylus_novaeguineae	0	0	0	0
	620	1	Crocodylus_novaeguineae	0	0	0	0
	621	1	Crocodylus_mindorensis	0	0	0	0
	622	1	Crocodylus_johnsoni	0	0	0	0
	623	2	Mecistops_cataphractus,Osteolaemus_tetraspis	0	0	0	0
	624	1	Osteolaemus_tetraspis	0	0	0	0
	625	1	Mecistops_cataphractus	0	0	0	0
	626	8	Alligator_mississippiensis,Alligator_sinensis,Caiman_crocodilus,Caiman_latirostris,Caiman_yacare,Melanosuchus_niger,Paleosuchus_palpebrosus,Paleosuchus_trigonatus	0	0	0	0
	627	6	Caiman_crocodilus,Caiman_latirostris,Caiman_yacare,Melanosuchus_niger,Paleosuchus_palpebrosus,Paleosuchus_trigonatus	0	0	0	0
	628	2	Paleosuchus_palpebrosus,Paleosuchus_trigonatus	0	0	0	0
	629	1	Paleosuchus_palpebrosus	0	0	0	0
	630	1	Paleosuchus_trigonatus	0	0	0	0
	631	4	Caiman_crocodilus,Caiman_latirostris,Caiman_yacare,Melanosuchus_niger	0	0	0	0
	632	3	Caiman_crocodilus,Caiman_latirostris,Caiman_yacare	0	0	0	0
	633	1	Caiman_latirostris	0	0	0	0
	634	2	Caiman_crocodilus,Caiman_yacare	0	0	0	0
	635	1	Caiman_crocodilus	0	0	0	0
	636	1	Caiman_yacare	0	0	0	0
	637	1	Melanosuchus_niger	0	0	0	0
	638	2	Alligator_mississippiensis,Alligator_sinensis	0	0	0	0
	639	1	Alligator_sinensis	0	0	0	0
	640	1	Alligator_mississippiensis	0	0	0	0
	641	2	Ornithosuchus_woodwardi,Riojasuchus_tenuisceps	0	0	0	0
	642	1	Ornithosuchus_woodwardi	0	0	0	0
	643	1	Riojasuchus_tenuisceps	0	0	0	0
	644	1	Parasuchus_hislopi	0	0	0	0
	645	73	Accipiter_cooperii,Accipiter_striatus,Allosaurus_fragilis,Amadina_erythrocephala,Amadina_fasciata,Archaeopteryx_lithographica,Branta_canadensis,Buteo_buteo,Cactospiza_pallida,Camarhynchus_parvulus,Camarhynchus_psittacula,Carduelis_chloris,Carduelis_flammea,Carduelis_sinica,Carduelis_spinus,Cariama_cristata,Carnotaurus_sastrei,Carpodacus_erythrinus,Certhidea_olivacea,Coelophysis_bauri,Coelophysis_…	0	0	0	0
	646	2	Lesothosaurus_diagnosticus,Stegosaurus_stenops	0	0	0	0
	647	1	Lesothosaurus_diagnosticus	0	0	0	0
	648	1	Stegosaurus_stenops	1	1	1	1	<-- branch-shift
	649	71	Accipiter_cooperii,Accipiter_striatus,Allosaurus_fragilis,Amadina_erythrocephala,Amadina_fasciata,Archaeopteryx_lithographica,Branta_canadensis,Buteo_buteo,Cactospiza_pallida,Camarhynchus_parvulus,Camarhynchus_psittacula,Carduelis_chloris,Carduelis_flammea,Carduelis_sinica,Carduelis_spinus,Cariama_cristata,Carnotaurus_sastrei,Carpodacus_erythrinus,Certhidea_olivacea,Coelophysis_bauri,Coelophysis_…	0	0	0	0
	650	1	Plateosaurus_engelhardti	1	1	1	1	<-- branch-shift
	651	70	Accipiter_cooperii,Accipiter_striatus,Allosaurus_fragilis,Amadina_erythrocephala,Amadina_fasciata,Archaeopteryx_lithographica,Branta_canadensis,Buteo_buteo,Cactospiza_pallida,Camarhynchus_parvulus,Camarhynchus_psittacula,Carduelis_chloris,Carduelis_flammea,Carduelis_sinica,Carduelis_spinus,Cariama_cristata,Carnotaurus_sastrei,Carpodacus_erythrinus,Certhidea_olivacea,Coelophysis_bauri,Coelophysis_…	0	0	0	0
	652	1	Herrerasaurus_ischigualastensis	0	0	0	0
	653	69	Accipiter_cooperii,Accipiter_striatus,Allosaurus_fragilis,Amadina_erythrocephala,Amadina_fasciata,Archaeopteryx_lithographica,Branta_canadensis,Buteo_buteo,Cactospiza_pallida,Camarhynchus_parvulus,Camarhynchus_psittacula,Carduelis_chloris,Carduelis_flammea,Carduelis_sinica,Carduelis_spinus,Cariama_cristata,Carnotaurus_sastrei,Carpodacus_erythrinus,Certhidea_olivacea,Coelophysis_bauri,Coelophysis_…	0	0	0	0
	654	2	Coelophysis_bauri,Coelophysis_rhodesiensis	0	0	0	0
	655	1	Coelophysis_bauri	0	0	0	0
	656	1	Coelophysis_rhodesiensis	0	0	0	0
	657	67	Accipiter_cooperii,Accipiter_striatus,Allosaurus_fragilis,Amadina_erythrocephala,Amadina_fasciata,Archaeopteryx_lithographica,Branta_canadensis,Buteo_buteo,Cactospiza_pallida,Camarhynchus_parvulus,Camarhynchus_psittacula,Carduelis_chloris,Carduelis_flammea,Carduelis_sinica,Carduelis_spinus,Cariama_cristata,Carnotaurus_sastrei,Carpodacus_erythrinus,Certhidea_olivacea,Daspletosaurus_torosus,Dromaeo…	0	0	0	0
	658	2	Carnotaurus_sastrei,Majungasaurus_crenatissimus	0	0	0	0
	659	1	Majungasaurus_crenatissimus	0	0	0	0
	660	1	Carnotaurus_sastrei	0	0	0	0
	661	65	Accipiter_cooperii,Accipiter_striatus,Allosaurus_fragilis,Amadina_erythrocephala,Amadina_fasciata,Archaeopteryx_lithographica,Branta_canadensis,Buteo_buteo,Cactospiza_pallida,Camarhynchus_parvulus,Camarhynchus_psittacula,Carduelis_chloris,Carduelis_flammea,Carduelis_sinica,Carduelis_spinus,Cariama_cristata,Carpodacus_erythrinus,Certhidea_olivacea,Daspletosaurus_torosus,Dromaeosaurus_albertensis,D…	0	0	0	0
	662	2	Allosaurus_fragilis,Sinraptor_dongi	0	0	0	0
	663	1	Sinraptor_dongi	0	0	0	0
	664	1	Allosaurus_fragilis	0	0	0	0
	665	63	Accipiter_cooperii,Accipiter_striatus,Amadina_erythrocephala,Amadina_fasciata,Archaeopteryx_lithographica,Branta_canadensis,Buteo_buteo,Cactospiza_pallida,Camarhynchus_parvulus,Camarhynchus_psittacula,Carduelis_chloris,Carduelis_flammea,Carduelis_sinica,Carduelis_spinus,Cariama_cristata,Carpodacus_erythrinus,Certhidea_olivacea,Daspletosaurus_torosus,Dromaeosaurus_albertensis,Dromaius_novaeholland…	0	0	0	0
	666	4	Daspletosaurus_torosus,Gorgosaurus_libratus,Tarbosaurus_bataar,Tyrannosaurus_rex	0	0	0	0
	667	1	Gorgosaurus_libratus	0	0	0	0
	668	3	Daspletosaurus_torosus,Tarbosaurus_bataar,Tyrannosaurus_rex	0	0	0	0
	669	1	Daspletosaurus_torosus	0	0	0	0
	670	2	Tarbosaurus_bataar,Tyrannosaurus_rex	0	0	0	0
	671	1	Tarbosaurus_bataar	0	0	0	0
	672	1	Tyrannosaurus_rex	0	0	0	0
	673	59	Accipiter_cooperii,Accipiter_striatus,Amadina_erythrocephala,Amadina_fasciata,Archaeopteryx_lithographica,Branta_canadensis,Buteo_buteo,Cactospiza_pallida,Camarhynchus_parvulus,Camarhynchus_psittacula,Carduelis_chloris,Carduelis_flammea,Carduelis_sinica,Carduelis_spinus,Cariama_cristata,Carpodacus_erythrinus,Certhidea_olivacea,Dromaeosaurus_albertensis,Dromaius_novaehollandiae,Eophona_migratoria,…	1	1	1	1	<-- clade-shift; Maniraptora
	674	1	Erlikosaurus_andrewsi	1	1	1	1
	675	58	Accipiter_cooperii,Accipiter_striatus,Amadina_erythrocephala,Amadina_fasciata,Archaeopteryx_lithographica,Branta_canadensis,Buteo_buteo,Cactospiza_pallida,Camarhynchus_parvulus,Camarhynchus_psittacula,Carduelis_chloris,Carduelis_flammea,Carduelis_sinica,Carduelis_spinus,Cariama_cristata,Carpodacus_erythrinus,Certhidea_olivacea,Dromaeosaurus_albertensis,Dromaius_novaehollandiae,Eophona_migratoria,…	1	1	1	1
	676	1	Dromaeosaurus_albertensis	1	1	1	1
	677	57	Accipiter_cooperii,Accipiter_striatus,Amadina_erythrocephala,Amadina_fasciata,Archaeopteryx_lithographica,Branta_canadensis,Buteo_buteo,Cactospiza_pallida,Camarhynchus_parvulus,Camarhynchus_psittacula,Carduelis_chloris,Carduelis_flammea,Carduelis_sinica,Carduelis_spinus,Cariama_cristata,Carpodacus_erythrinus,Certhidea_olivacea,Dromaius_novaehollandiae,Eophona_migratoria,Erythrura_gouldiae,Erythru…	1	1	1	1
	678	1	Archaeopteryx_lithographica	1	1	1	1
	679	56	Accipiter_cooperii,Accipiter_striatus,Amadina_erythrocephala,Amadina_fasciata,Branta_canadensis,Buteo_buteo,Cactospiza_pallida,Camarhynchus_parvulus,Camarhynchus_psittacula,Carduelis_chloris,Carduelis_flammea,Carduelis_sinica,Carduelis_spinus,Cariama_cristata,Carpodacus_erythrinus,Certhidea_olivacea,Dromaius_novaehollandiae,Eophona_migratoria,Erythrura_gouldiae,Erythrura_trichroa,Estrilda_troglod…	1	1	1	1
	680	53	Accipiter_cooperii,Accipiter_striatus,Amadina_erythrocephala,Amadina_fasciata,Branta_canadensis,Buteo_buteo,Cactospiza_pallida,Camarhynchus_parvulus,Camarhynchus_psittacula,Carduelis_chloris,Carduelis_flammea,Carduelis_sinica,Carduelis_spinus,Cariama_cristata,Carpodacus_erythrinus,Certhidea_olivacea,Eophona_migratoria,Erythrura_gouldiae,Erythrura_trichroa,Estrilda_troglodytes,Falco_columbarius,Fa…	1	1	1	1
	681	2	Branta_canadensis,Gallus_gallus	1	1	1	1
	682	1	Branta_canadensis	1	1	1	1
	683	1	Gallus_gallus	1	1	1	1
	684	51	Accipiter_cooperii,Accipiter_striatus,Amadina_erythrocephala,Amadina_fasciata,Buteo_buteo,Cactospiza_pallida,Camarhynchus_parvulus,Camarhynchus_psittacula,Carduelis_chloris,Carduelis_flammea,Carduelis_sinica,Carduelis_spinus,Cariama_cristata,Carpodacus_erythrinus,Certhidea_olivacea,Eophona_migratoria,Erythrura_gouldiae,Erythrura_trichroa,Estrilda_troglodytes,Falco_columbarius,Falco_mexicanus,Falc…	1	1	1	1
	685	11	Accipiter_cooperii,Accipiter_striatus,Buteo_buteo,Cariama_cristata,Falco_columbarius,Falco_mexicanus,Falco_peregrinus,Falco_sparverius,Geranoaetus_melanoleucus,Larus_fuscus,Myiopsitta_monachus	1	1	1	1
	686	10	Accipiter_cooperii,Accipiter_striatus,Buteo_buteo,Cariama_cristata,Falco_columbarius,Falco_mexicanus,Falco_peregrinus,Falco_sparverius,Geranoaetus_melanoleucus,Larus_fuscus	1	1	1	1
	687	2	Cariama_cristata,Larus_fuscus	1	1	1	1
	688	1	Larus_fuscus	1	1	1	1
	689	1	Cariama_cristata	1	1	1	1
	690	8	Accipiter_cooperii,Accipiter_striatus,Buteo_buteo,Falco_columbarius,Falco_mexicanus,Falco_peregrinus,Falco_sparverius,Geranoaetus_melanoleucus	1	1	1	1
	691	4	Falco_columbarius,Falco_mexicanus,Falco_peregrinus,Falco_sparverius	1	1	1	1
	692	3	Falco_columbarius,Falco_mexicanus,Falco_peregrinus	1	1	1	1
	693	2	Falco_mexicanus,Falco_peregrinus	1	1	1	1
	694	1	Falco_peregrinus	1	1	1	1
	695	1	Falco_mexicanus	1	1	1	1
	696	1	Falco_columbarius	1	1	1	1
	697	1	Falco_sparverius	1	1	1	1
	698	4	Accipiter_cooperii,Accipiter_striatus,Buteo_buteo,Geranoaetus_melanoleucus	1	1	1	1
	699	2	Buteo_buteo,Geranoaetus_melanoleucus	1	1	1	1
	700	1	Geranoaetus_melanoleucus	1	1	1	1
	701	1	Buteo_buteo	1	1	1	1
	702	2	Accipiter_cooperii,Accipiter_striatus	1	1	1	1
	703	1	Accipiter_striatus	1	1	1	1
	704	1	Accipiter_cooperii	1	1	1	1
	705	1	Myiopsitta_monachus	1	1	1	1
	706	40	Amadina_erythrocephala,Amadina_fasciata,Cactospiza_pallida,Camarhynchus_parvulus,Camarhynchus_psittacula,Carduelis_chloris,Carduelis_flammea,Carduelis_sinica,Carduelis_spinus,Carpodacus_erythrinus,Certhidea_olivacea,Eophona_migratoria,Erythrura_gouldiae,Erythrura_trichroa,Estrilda_troglodytes,Geospiza_fortis,Geospiza_fuliginosa,Geospiza_magnirostris,Geospiza_scandens,Hypargos_niveoguttatus,Lagono…	1	1	1	1	<-- branch-shift; branch subtending Passeroidea
	707	22	Cactospiza_pallida,Camarhynchus_parvulus,Camarhynchus_psittacula,Carduelis_chloris,Carduelis_flammea,Carduelis_sinica,Carduelis_spinus,Carpodacus_erythrinus,Certhidea_olivacea,Eophona_migratoria,Geospiza_fortis,Geospiza_fuliginosa,Geospiza_magnirostris,Geospiza_scandens,Mycerobas_affinis,Padda_oryzivora,Platyspiza_crassirostris,Pyrrhula_pyrrhula,Rhodospiza_obsoleta,Serinus_leucopygius,Serinus_moz…	1	1	1	1
	708	1	Padda_oryzivora	1	1	1	1
	709	21	Cactospiza_pallida,Camarhynchus_parvulus,Camarhynchus_psittacula,Carduelis_chloris,Carduelis_flammea,Carduelis_sinica,Carduelis_spinus,Carpodacus_erythrinus,Certhidea_olivacea,Eophona_migratoria,Geospiza_fortis,Geospiza_fuliginosa,Geospiza_magnirostris,Geospiza_scandens,Mycerobas_affinis,Platyspiza_crassirostris,Pyrrhula_pyrrhula,Rhodospiza_obsoleta,Serinus_leucopygius,Serinus_mozambicus,Serinus_…	1	1	1	1
	710	12	Carduelis_chloris,Carduelis_flammea,Carduelis_sinica,Carduelis_spinus,Carpodacus_erythrinus,Eophona_migratoria,Mycerobas_affinis,Pyrrhula_pyrrhula,Rhodospiza_obsoleta,Serinus_leucopygius,Serinus_mozambicus,Serinus_sulphuratus	1	1	1	1
	711	11	Carduelis_chloris,Carduelis_flammea,Carduelis_sinica,Carduelis_spinus,Carpodacus_erythrinus,Eophona_migratoria,Mycerobas_affinis,Pyrrhula_pyrrhula,Serinus_leucopygius,Serinus_mozambicus,Serinus_sulphuratus	1	1	1	1
	712	2	Eophona_migratoria,Mycerobas_affinis	1	1	1	1
	713	1	Eophona_migratoria	1	1	1	1
	714	1	Mycerobas_affinis	1	1	1	1
	715	9	Carduelis_chloris,Carduelis_flammea,Carduelis_sinica,Carduelis_spinus,Carpodacus_erythrinus,Pyrrhula_pyrrhula,Serinus_leucopygius,Serinus_mozambicus,Serinus_sulphuratus	1	1	1	1
	716	8	Carduelis_chloris,Carduelis_flammea,Carduelis_sinica,Carduelis_spinus,Carpodacus_erythrinus,Serinus_leucopygius,Serinus_mozambicus,Serinus_sulphuratus	1	1	1	1
	717	7	Carduelis_chloris,Carduelis_flammea,Carduelis_sinica,Carduelis_spinus,Serinus_leucopygius,Serinus_mozambicus,Serinus_sulphuratus	1	1	1	1
	718	5	Carduelis_flammea,Carduelis_spinus,Serinus_leucopygius,Serinus_mozambicus,Serinus_sulphuratus	1	1	1	1
	719	4	Carduelis_flammea,Serinus_leucopygius,Serinus_mozambicus,Serinus_sulphuratus	1	1	1	1
	720	1	Carduelis_flammea	1	1	1	1
	721	3	Serinus_leucopygius,Serinus_mozambicus,Serinus_sulphuratus	1	1	1	1
	722	2	Serinus_mozambicus,Serinus_sulphuratus	1	1	1	1
	723	1	Serinus_mozambicus	1	1	1	1
	724	1	Serinus_sulphuratus	1	1	1	1
	725	1	Serinus_leucopygius	1	1	1	1
	726	1	Carduelis_spinus	1	1	1	1
	727	2	Carduelis_chloris,Carduelis_sinica	1	1	1	1
	728	1	Carduelis_sinica	1	1	1	1
	729	1	Carduelis_chloris	1	1	1	1
	730	1	Carpodacus_erythrinus	1	1	1	1
	731	1	Pyrrhula_pyrrhula	1	1	1	1
	732	1	Rhodospiza_obsoleta	1	1	1	1
	733	9	Cactospiza_pallida,Camarhynchus_parvulus,Camarhynchus_psittacula,Certhidea_olivacea,Geospiza_fortis,Geospiza_fuliginosa,Geospiza_magnirostris,Geospiza_scandens,Platyspiza_crassirostris	1	1	1	1	<-- clade-shift; Darwin's finches
	734	2	Cactospiza_pallida,Platyspiza_crassirostris	1	1	1	1
	735	1	Cactospiza_pallida	1	1	1	1
	736	1	Platyspiza_crassirostris	1	1	1	1
	737	7	Camarhynchus_parvulus,Camarhynchus_psittacula,Certhidea_olivacea,Geospiza_fortis,Geospiza_fuliginosa,Geospiza_magnirostris,Geospiza_scandens	1	1	1	1
	738	3	Camarhynchus_parvulus,Camarhynchus_psittacula,Certhidea_olivacea	1	1	1	1
	739	2	Camarhynchus_parvulus,Camarhynchus_psittacula	1	1	1	1
	740	1	Camarhynchus_psittacula	1	1	1	1
	741	1	Camarhynchus_parvulus	1	1	1	1
	742	1	Certhidea_olivacea	1	1	1	1
	743	4	Geospiza_fortis,Geospiza_fuliginosa,Geospiza_magnirostris,Geospiza_scandens	1	1	1	1
	744	1	Geospiza_fortis	1	1	1	1
	745	3	Geospiza_fuliginosa,Geospiza_magnirostris,Geospiza_scandens	1	1	1	1
	746	2	Geospiza_magnirostris,Geospiza_scandens	1	1	1	1
	747	1	Geospiza_scandens	1	1	1	1
	748	1	Geospiza_magnirostris	1	1	1	1
	749	1	Geospiza_fuliginosa	1	1	1	1
	750	18	Amadina_erythrocephala,Amadina_fasciata,Erythrura_gouldiae,Erythrura_trichroa,Estrilda_troglodytes,Hypargos_niveoguttatus,Lagonosticta_senegala,Lonchura_fringilloides,Lonchura_pallida,Lonchura_punctulata,Neochmia_modesta,Neochmia_ruficauda,Poephila_acuticauda,Poephila_cincta,Pytilia_hypogrammica,Taeniopygia_bichenovii,Taeniopygia_guttata,Uraeginthus_bengalus	1	1	1	1
	751	9	Amadina_erythrocephala,Amadina_fasciata,Erythrura_gouldiae,Erythrura_trichroa,Estrilda_troglodytes,Hypargos_niveoguttatus,Lagonosticta_senegala,Pytilia_hypogrammica,Uraeginthus_bengalus	1	1	1	1
	752	7	Amadina_erythrocephala,Amadina_fasciata,Estrilda_troglodytes,Hypargos_niveoguttatus,Lagonosticta_senegala,Pytilia_hypogrammica,Uraeginthus_bengalus	1	1	1	1
	753	6	Amadina_erythrocephala,Amadina_fasciata,Hypargos_niveoguttatus,Lagonosticta_senegala,Pytilia_hypogrammica,Uraeginthus_bengalus	1	1	1	1
	754	4	Hypargos_niveoguttatus,Lagonosticta_senegala,Pytilia_hypogrammica,Uraeginthus_bengalus	1	1	1	1
	755	3	Hypargos_niveoguttatus,Lagonosticta_senegala,Pytilia_hypogrammica	1	1	1	1
	756	2	Lagonosticta_senegala,Pytilia_hypogrammica	1	1	1	1
	757	1	Lagonosticta_senegala	1	1	1	1
	758	1	Pytilia_hypogrammica	1	1	1	1
	759	1	Hypargos_niveoguttatus	1	1	1	1
	760	1	Uraeginthus_bengalus	1	1	1	1
	761	2	Amadina_erythrocephala,Amadina_fasciata	1	1	1	1
	762	1	Amadina_erythrocephala	1	1	1	1
	763	1	Amadina_fasciata	1	1	1	1
	764	1	Estrilda_troglodytes	1	1	1	1
	765	2	Erythrura_gouldiae,Erythrura_trichroa	1	1	1	1
	766	1	Erythrura_gouldiae	1	1	1	1
	767	1	Erythrura_trichroa	1	1	1	1
	768	9	Lonchura_fringilloides,Lonchura_pallida,Lonchura_punctulata,Neochmia_modesta,Neochmia_ruficauda,Poephila_acuticauda,Poephila_cincta,Taeniopygia_bichenovii,Taeniopygia_guttata	1	1	1	1
	769	7	Lonchura_fringilloides,Lonchura_pallida,Lonchura_punctulata,Poephila_acuticauda,Poephila_cincta,Taeniopygia_bichenovii,Taeniopygia_guttata	1	1	1	1
	770	3	Lonchura_fringilloides,Lonchura_pallida,Lonchura_punctulata	1	1	1	1
	771	1	Lonchura_fringilloides	1	1	1	1
	772	2	Lonchura_pallida,Lonchura_punctulata	1	1	1	1
	773	1	Lonchura_punctulata	1	1	1	1
	774	1	Lonchura_pallida	1	1	1	1
	775	4	Poephila_acuticauda,Poephila_cincta,Taeniopygia_bichenovii,Taeniopygia_guttata	1	1	1	1
	776	2	Poephila_acuticauda,Poephila_cincta	1	1	1	1
	777	1	Poephila_cincta	1	1	1	1
	778	1	Poephila_acuticauda	1	1	1	1
	779	2	Taeniopygia_bichenovii,Taeniopygia_guttata	1	1	1	1
	780	1	Taeniopygia_bichenovii	1	1	1	1
	781	1	Taeniopygia_guttata	1	1	1	1
	782	2	Neochmia_modesta,Neochmia_ruficauda	1	1	1	1
	783	1	Neochmia_ruficauda	1	1	1	1
	784	1	Neochmia_modesta	1	1	1	1
	785	3	Dromaius_novaehollandiae,Rhea_americana,Struthio_camelus	1	1	1	1
	786	2	Dromaius_novaehollandiae,Struthio_camelus	1	1	1	1
	787	1	Struthio_camelus	1	1	1	1
	788	1	Dromaius_novaehollandiae	1	1	1	1
	789	1	Rhea_americana	1	1	1	1
	790	1	Euparkeria_capensis	0	0	0	0
	791	15	Apalone_ferox,Batagur_borneoensis,Chelus_fimbriata,Chelydra_serpentina,Dogania_subplana,Macrochelys_temminckii,Mauremys_reevesii,Pelodiscus_sinensis,Pelomedusa_subrufa,Platysternon_megacephalum,Staurotypus_triporcatus,Sternotherus_odoratus,Terrapene_carolina,Testudo_horsfieldii,Trachemys_scripta	0	0	0	0
	792	13	Apalone_ferox,Batagur_borneoensis,Chelydra_serpentina,Dogania_subplana,Macrochelys_temminckii,Mauremys_reevesii,Pelodiscus_sinensis,Platysternon_megacephalum,Staurotypus_triporcatus,Sternotherus_odoratus,Terrapene_carolina,Testudo_horsfieldii,Trachemys_scripta	0	0	0	0
	793	10	Batagur_borneoensis,Chelydra_serpentina,Macrochelys_temminckii,Mauremys_reevesii,Platysternon_megacephalum,Staurotypus_triporcatus,Sternotherus_odoratus,Terrapene_carolina,Testudo_horsfieldii,Trachemys_scripta	0	0	0	0
	794	2	Staurotypus_triporcatus,Sternotherus_odoratus	0	0	0	0
	795	1	Staurotypus_triporcatus	0	0	0	0
	796	1	Sternotherus_odoratus	0	0	0	0
	797	8	Batagur_borneoensis,Chelydra_serpentina,Macrochelys_temminckii,Mauremys_reevesii,Platysternon_megacephalum,Terrapene_carolina,Testudo_horsfieldii,Trachemys_scripta	0	0	0	0
	798	6	Batagur_borneoensis,Mauremys_reevesii,Platysternon_megacephalum,Terrapene_carolina,Testudo_horsfieldii,Trachemys_scripta	0	0	0	0
	799	1	Platysternon_megacephalum	0	0	0	0
	800	5	Batagur_borneoensis,Mauremys_reevesii,Terrapene_carolina,Testudo_horsfieldii,Trachemys_scripta	0	0	0	0
	801	3	Batagur_borneoensis,Mauremys_reevesii,Testudo_horsfieldii	0	0	0	0
	802	1	Testudo_horsfieldii	0	0	0	0
	803	2	Batagur_borneoensis,Mauremys_reevesii	0	0	0	0
	804	1	Mauremys_reevesii	0	0	0	0
	805	1	Batagur_borneoensis	0	0	0	0
	806	2	Terrapene_carolina,Trachemys_scripta	0	0	0	0
	807	1	Terrapene_carolina	0	0	0	0
	808	1	Trachemys_scripta	0	0	0	0
	809	2	Chelydra_serpentina,Macrochelys_temminckii	0	0	0	0
	810	1	Chelydra_serpentina	0	0	0	0
	811	1	Macrochelys_temminckii	0	0	0	0
	812	3	Apalone_ferox,Dogania_subplana,Pelodiscus_sinensis	0	0	0	0
	813	1	Dogania_subplana	0	0	0	0
	814	2	Apalone_ferox,Pelodiscus_sinensis	0	0	0	0
	815	1	Apalone_ferox	0	0	0	0
	816	1	Pelodiscus_sinensis	0	0	0	0
	817	2	Chelus_fimbriata,Pelomedusa_subrufa	0	0	0	0
	818	1	Chelus_fimbriata	0	0	0	0
	819	1	Pelomedusa_subrufa	0	0	0	0
	820	24	Anolis_chloris,Anolis_cristatellus,Anolis_distichus,Anolis_equestris,Anolis_garmani,Anolis_gundlachi,Anolis_limifrons,Anolis_oxylophus,Anolis_pulchellus,Anolis_sheplani,Anolis_valencienni,Corucia_zebrata,Dactyloa_frenata,Gallotia_galloti,Laudakia_stellio,Norops_auratus,Norops_humilis,Saara_hardwickii,Sphenodon_punctatus,Tiliqua_scincoides,Tupinambis_merianae,Uromastyx_acanthinura,Xenosaurus_grand…	0	0	0	0
	821	23	Anolis_chloris,Anolis_cristatellus,Anolis_distichus,Anolis_equestris,Anolis_garmani,Anolis_gundlachi,Anolis_limifrons,Anolis_oxylophus,Anolis_pulchellus,Anolis_sheplani,Anolis_valencienni,Corucia_zebrata,Dactyloa_frenata,Gallotia_galloti,Laudakia_stellio,Norops_auratus,Norops_humilis,Saara_hardwickii,Tiliqua_scincoides,Tupinambis_merianae,Uromastyx_acanthinura,Xenosaurus_grandis,Xenosaurus_platyc…	0	0	0	0
	822	21	Anolis_chloris,Anolis_cristatellus,Anolis_distichus,Anolis_equestris,Anolis_garmani,Anolis_gundlachi,Anolis_limifrons,Anolis_oxylophus,Anolis_pulchellus,Anolis_sheplani,Anolis_valencienni,Dactyloa_frenata,Gallotia_galloti,Laudakia_stellio,Norops_auratus,Norops_humilis,Saara_hardwickii,Tupinambis_merianae,Uromastyx_acanthinura,Xenosaurus_grandis,Xenosaurus_platyceps	0	0	0	0
	823	2	Gallotia_galloti,Tupinambis_merianae	0	0	0	0
	824	1	Gallotia_galloti	0	0	0	0
	825	1	Tupinambis_merianae	0	0	0	0
	826	19	Anolis_chloris,Anolis_cristatellus,Anolis_distichus,Anolis_equestris,Anolis_garmani,Anolis_gundlachi,Anolis_limifrons,Anolis_oxylophus,Anolis_pulchellus,Anolis_sheplani,Anolis_valencienni,Dactyloa_frenata,Laudakia_stellio,Norops_auratus,Norops_humilis,Saara_hardwickii,Uromastyx_acanthinura,Xenosaurus_grandis,Xenosaurus_platyceps	0	0	0	0
	827	17	Anolis_chloris,Anolis_cristatellus,Anolis_distichus,Anolis_equestris,Anolis_garmani,Anolis_gundlachi,Anolis_limifrons,Anolis_oxylophus,Anolis_pulchellus,Anolis_sheplani,Anolis_valencienni,Dactyloa_frenata,Laudakia_stellio,Norops_auratus,Norops_humilis,Saara_hardwickii,Uromastyx_acanthinura	0	0	0	0
	828	3	Laudakia_stellio,Saara_hardwickii,Uromastyx_acanthinura	0	0	0	0
	829	2	Saara_hardwickii,Uromastyx_acanthinura	0	0	0	0
	830	1	Saara_hardwickii	0	0	0	0
	831	1	Uromastyx_acanthinura	0	0	0	0
	832	1	Laudakia_stellio	0	0	0	0
	833	14	Anolis_chloris,Anolis_cristatellus,Anolis_distichus,Anolis_equestris,Anolis_garmani,Anolis_gundlachi,Anolis_limifrons,Anolis_oxylophus,Anolis_pulchellus,Anolis_sheplani,Anolis_valencienni,Dactyloa_frenata,Norops_auratus,Norops_humilis	0	0	0	0
	834	12	Anolis_chloris,Anolis_cristatellus,Anolis_distichus,Anolis_equestris,Anolis_garmani,Anolis_gundlachi,Anolis_limifrons,Anolis_oxylophus,Anolis_pulchellus,Anolis_sheplani,Anolis_valencienni,Dactyloa_frenata	0	0	0	0
	835	11	Anolis_chloris,Anolis_cristatellus,Anolis_distichus,Anolis_equestris,Anolis_garmani,Anolis_gundlachi,Anolis_limifrons,Anolis_oxylophus,Anolis_pulchellus,Anolis_sheplani,Anolis_valencienni	0	0	0	0
	836	1	Anolis_chloris	0	0	0	0
	837	10	Anolis_cristatellus,Anolis_distichus,Anolis_equestris,Anolis_garmani,Anolis_gundlachi,Anolis_limifrons,Anolis_oxylophus,Anolis_pulchellus,Anolis_sheplani,Anolis_valencienni	0	0	0	0
	838	9	Anolis_cristatellus,Anolis_distichus,Anolis_garmani,Anolis_gundlachi,Anolis_limifrons,Anolis_oxylophus,Anolis_pulchellus,Anolis_sheplani,Anolis_valencienni	0	0	0	0
	839	8	Anolis_cristatellus,Anolis_distichus,Anolis_garmani,Anolis_gundlachi,Anolis_limifrons,Anolis_oxylophus,Anolis_pulchellus,Anolis_valencienni	0	0	0	0
	840	4	Anolis_cristatellus,Anolis_distichus,Anolis_gundlachi,Anolis_pulchellus	0	0	0	0
	841	3	Anolis_cristatellus,Anolis_gundlachi,Anolis_pulchellus	0	0	0	0
	842	2	Anolis_gundlachi,Anolis_pulchellus	0	0	0	0
	843	1	Anolis_gundlachi	0	0	0	0
	844	1	Anolis_pulchellus	0	0	0	0
	845	1	Anolis_cristatellus	0	0	0	0
	846	1	Anolis_distichus	0	0	0	0
	847	4	Anolis_garmani,Anolis_limifrons,Anolis_oxylophus,Anolis_valencienni	0	0	0	0
	848	2	Anolis_limifrons,Anolis_oxylophus	0	0	0	0
	849	1	Anolis_limifrons	0	0	0	0
	850	1	Anolis_oxylophus	0	0	0	0
	851	2	Anolis_garmani,Anolis_valencienni	0	0	0	0
	852	1	Anolis_garmani	0	0	0	0
	853	1	Anolis_valencienni	0	0	0	0
	854	1	Anolis_sheplani	0	0	0	0
	855	1	Anolis_equestris	0	0	0	0
	856	1	Dactyloa_frenata	0	0	0	0
	857	2	Norops_auratus,Norops_humilis	0	0	0	0
	858	1	Norops_humilis	0	0	0	0
	859	1	Norops_auratus	0	0	0	0
	860	2	Xenosaurus_grandis,Xenosaurus_platyceps	0	0	0	0
	861	1	Xenosaurus_platyceps	0	0	0	0
	862	1	Xenosaurus_grandis	0	0	0	0
	863	2	Corucia_zebrata,Tiliqua_scincoides	0	0	0	0
	864	1	Tiliqua_scincoides	0	0	0	0
	865	1	Corucia_zebrata	0	0	0	0
	866	1	Sphenodon_punctatus	0	0	0	0
						number of branches under PPS:	182

## Sheet: rep1
Node ID	No Taxa	Original BL	No different from original	Pct time scaled	Mean Scalar	Mode Scalar	Median Scalar	SD Scalar	Mean SigV	Mode SigV	Median SigV	SD SigV	Mean DeltaB	Mode DeltaB	Median DeltaB	SD DeltaB	Mean DeltaV	Mode DeltaV	Median DeltaV	SD DeltaV	Taxa List	PPS
0	434	0	0	0	0	0	0	0	0	0	0	0	0	0	0	0	0	0	0	0	Accipiter_cooperii,Accipiter_striatus,Acinonyx_jubatus,Ailuropoda_melanoleuca,Ailurus_fulgens,Alligator_mississippiensis,Alligator_sinensis,Allosaurus_fragilis,Alouatta_guariba,Amadina_erythrocephala,Amadina_fasciata,Anolis_chloris,Anolis_cristatellus,Anolis_distichus,Anolis_equestris,Anolis_garmani,Anolis_gundlachi,Anolis_limifrons,Anolis_oxylophus,Anolis_pulchellus,Anolis_sheplani,Anolis_valenc…	0
1	295	156.858	35	3.88889	1.13409	1.00873	1	1.13996	0.000755	0.000729	0.00074	0.000716	0.107965	0.114515	0.115369	0.04434	0.118409	0.114327	0.116075	0.112347	Acinonyx_jubatus,Ailuropoda_melanoleuca,Ailurus_fulgens,Alouatta_guariba,Aonyx_capensis,Aonyx_cinerea,Aotus_trivirgatus,Arctictis_binturong,Arctogalidia_trivirgata,Artibeus_jamaicensis,Artibeus_lituratus,Ateles_geoffroyi,Atelocynus_microtis,Australopithecus_afarensis,Australopithecus_africanus,Australopithecus_anamensis,Avahi_laniger,Bassaricyon_alleni,Bassaricyon_gabbii,Bassariscus_astutus,Bassa…	0
2	286	66.2136	92	10.2222	1.70349	1.02344	1	3.57222	0.000852	0.000727	0.000766	0.001186	0.045575	0.048339	0.0487	0.018717	0.056387	0.048109	0.05072	0.078498	Acinonyx_jubatus,Ailuropoda_melanoleuca,Ailurus_fulgens,Alouatta_guariba,Aonyx_capensis,Aonyx_cinerea,Aotus_trivirgatus,Arctictis_binturong,Arctogalidia_trivirgata,Artibeus_jamaicensis,Artibeus_lituratus,Ateles_geoffroyi,Atelocynus_microtis,Australopithecus_afarensis,Australopithecus_africanus,Australopithecus_anamensis,Avahi_laniger,Bassaricyon_alleni,Bassaricyon_gabbii,Bassariscus_astutus,Bassa…	0
3	231	15.5761	232	25.7778	3.11961	1.80304	1	6.57468	0.001123	0.000753	0.000828	0.001497	0.010721	0.011371	0.011456	0.004403	0.0175	0.01173	0.012897	0.023317	Acinonyx_jubatus,Ailuropoda_melanoleuca,Ailurus_fulgens,Aonyx_capensis,Aonyx_cinerea,Arctictis_binturong,Arctogalidia_trivirgata,Artibeus_jamaicensis,Artibeus_lituratus,Atelocynus_microtis,Bassaricyon_alleni,Bassaricyon_gabbii,Bassariscus_astutus,Bassariscus_sumichrasti,Bdeogale_crassicauda,Canis_adustus,Canis_aureus,Canis_latrans,Canis_lupus,Canis_mesomelas,Caracal_aurata,Caracal_caracal,Carolli…	0
4	165	3.4833	228	25.3333	3.55261	1.3183	1	11.8484	0.001157	0.000749	0.000827	0.002356	0.002398	0.002543	0.002562	0.000985	0.004031	0.00261	0.002881	0.008208	Acinonyx_jubatus,Ailuropoda_melanoleuca,Ailurus_fulgens,Aonyx_capensis,Aonyx_cinerea,Arctictis_binturong,Arctogalidia_trivirgata,Atelocynus_microtis,Bassaricyon_alleni,Bassaricyon_gabbii,Bassariscus_astutus,Bassariscus_sumichrasti,Bdeogale_crassicauda,Canis_adustus,Canis_aureus,Canis_latrans,Canis_lupus,Canis_mesomelas,Caracal_aurata,Caracal_caracal,Cerdocyon_thous,Chrysocyon_brachyurus,Civettict…	0
5	163	23.4323	237	26.3333	3.09273	0.99881	1	17.5189	0.00096	0.000757	0.000819	0.001221	0.016128	0.017107	0.017234	0.006624	0.022499	0.017729	0.019191	0.028608	Acinonyx_jubatus,Ailuropoda_melanoleuca,Ailurus_fulgens,Aonyx_capensis,Aonyx_cinerea,Arctictis_binturong,Arctogalidia_trivirgata,Atelocynus_microtis,Bassaricyon_alleni,Bassaricyon_gabbii,Bassariscus_astutus,Bassariscus_sumichrasti,Bdeogale_crassicauda,Canis_adustus,Canis_aureus,Canis_latrans,Canis_lupus,Canis_mesomelas,Caracal_aurata,Caracal_caracal,Cerdocyon_thous,Chrysocyon_brachyurus,Civettict…	0
6	79	9.20378	239	26.5556	2.78357	1.07176	1	6.80185	0.000976	0.000751	0.000813	0.001082	0.006335	0.006719	0.006769	0.002602	0.008983	0.006913	0.007483	0.009962	Ailuropoda_melanoleuca,Ailurus_fulgens,Aonyx_capensis,Aonyx_cinerea,Atelocynus_microtis,Bassaricyon_alleni,Bassaricyon_gabbii,Bassariscus_astutus,Bassariscus_sumichrasti,Canis_adustus,Canis_aureus,Canis_latrans,Canis_lupus,Canis_mesomelas,Cerdocyon_thous,Chrysocyon_brachyurus,Conepatus_semistriatus,Cuon_alpinus,Eira_barbara,Enhydra_lutris,Galictis_cuja,Gulo_gulo,Helarctos_malayanus,Hydrictis_macu…	0
7	25	33.1564	245	27.2222	3.1632	0.959243	1	12.7279	0.001014	0.00075	0.000814	0.001446	0.022821	0.024206	0.024387	0.009372	0.033635	0.024883	0.026989	0.047944	Atelocynus_microtis,Canis_adustus,Canis_aureus,Canis_latrans,Canis_lupus,Canis_mesomelas,Cerdocyon_thous,Chrysocyon_brachyurus,Cuon_alpinus,Lycalopex_culpaeus,Lycalopex_griseus,Lycalopex_gymnocercus,Lycalopex_vetulus,Lycaon_pictus,Nyctereutes_procyonoides,Otocyon_megalotis,Speothos_venaticus,Urocyon_cinereoargenteus,Vulpes_chama,Vulpes_ferrilata,Vulpes_lagopus,Vulpes_rueppellii,Vulpes_velox,Vulpe…	0
8	24	1e-05	253	28.1111	2.87623	0.985121	1	5.17921	0.001153	0.00076	0.000822	0.002078	0	0	0	0	0	0	0	0	Atelocynus_microtis,Canis_adustus,Canis_aureus,Canis_latrans,Canis_lupus,Canis_mesomelas,Cerdocyon_thous,Chrysocyon_brachyurus,Cuon_alpinus,Lycalopex_culpaeus,Lycalopex_griseus,Lycalopex_gymnocercus,Lycalopex_vetulus,Lycaon_pictus,Nyctereutes_procyonoides,Otocyon_megalotis,Speothos_venaticus,Vulpes_chama,Vulpes_ferrilata,Vulpes_lagopus,Vulpes_rueppellii,Vulpes_velox,Vulpes_vulpes,Vulpes_zerda	0
9	16	1e-05	275	30.5556	3.30727	0.986185	1	8.07558	0.001327	0.000748	0.000824	0.003033	0	0	0	0	0	0	0	0	Atelocynus_microtis,Canis_adustus,Canis_aureus,Canis_latrans,Canis_lupus,Canis_mesomelas,Cerdocyon_thous,Chrysocyon_brachyurus,Cuon_alpinus,Lycalopex_culpaeus,Lycalopex_griseus,Lycalopex_gymnocercus,Lycalopex_vetulus,Lycaon_pictus,Nyctereutes_procyonoides,Speothos_venaticus	0
10	1	12.6	243	27	2.79409	3.33877	1	8.63593	0.000954	0.000747	0.00081	0.001169	0.008673	0.009199	0.009267	0.003562	0.012018	0.009406	0.010205	0.014734	Nyctereutes_procyonoides	0
11	15	4.32467	264	29.3333	2.58882	0.973546	1	4.61311	0.000965	0.000755	0.000822	0.001042	0.002977	0.003157	0.003181	0.001222	0.004174	0.003267	0.003555	0.004505	Atelocynus_microtis,Canis_adustus,Canis_aureus,Canis_latrans,Canis_lupus,Canis_mesomelas,Cerdocyon_thous,Chrysocyon_brachyurus,Cuon_alpinus,Lycalopex_culpaeus,Lycalopex_griseus,Lycalopex_gymnocercus,Lycalopex_vetulus,Lycaon_pictus,Speothos_venaticus	0
12	4	1.48415	285	31.6667	3.54057	1.06086	1	13.1122	0.00124	0.000747	0.000825	0.00201	0.001022	0.001084	0.001092	0.00042	0.00184	0.001109	0.001224	0.002983	Chrysocyon_brachyurus,Cuon_alpinus,Lycaon_pictus,Speothos_venaticus	0
13	2	0.707206	289	32.1111	2.96611	0.947195	1	8.39982	0.001066	0.000755	0.000825	0.001328	0.000487	0.000516	0.00052	0.0002	0.000754	0.000534	0.000583	0.000939	Chrysocyon_brachyurus,Cuon_alpinus	0
14	1	6.08397	285	31.6667	2.69231	1.01522	1	4.94314	0.001023	0.00073	0.000819	0.002055	0.004188	0.004442	0.004475	0.00172	0.006225	0.004439	0.004986	0.0125	Chrysocyon_brachyurus	0
15	1	6.08397	281	31.2222	2.5289	0.995255	1	4.23891	0.000949	0.000748	0.000817	0.000975	0.004188	0.004442	0.004475	0.00172	0.005772	0.004551	0.004971	0.00593	Cuon_alpinus	0
16	2	1.33221	301	33.4444	2.8351	1.01366	1	4.69361	0.001131	0.000743	0.000825	0.001557	0.000917	0.000973	0.00098	0.000377	0.001507	0.00099	0.001099	0.002075	Lycaon_pictus,Speothos_venaticus	0
17	1	5.45897	285	31.6667	3.0815	0.932586	1	9.93536	0.00105	0.00075	0.000824	0.001287	0.003757	0.003985	0.004015	0.001543	0.00573	0.004094	0.004495	0.007023	Lycaon_pictus	0
18	1	5.45897	282	31.3333	2.70011	0.989149	1	4.74482	0.001015	0.000747	0.00082	0.001262	0.003757	0.003985	0.004015	0.001543	0.005539	0.004078	0.004477	0.006892	Speothos_venaticus	0
19	11	1.89435	300	33.3333	2.82229	0.944786	1	5.94305	0.001068	0.000736	0.000832	0.001302	0.001304	0.001383	0.001393	0.000535	0.002023	0.001394	0.001576	0.002466	Atelocynus_microtis,Canis_adustus,Canis_aureus,Canis_latrans,Canis_lupus,Canis_mesomelas,Cerdocyon_thous,Lycalopex_culpaeus,Lycalopex_griseus,Lycalopex_gymnocercus,Lycalopex_vetulus	0
20	6	2.07878	306	34	3.08799	1.08827	1	8.20122	0.00112	0.000741	0.000837	0.001528	0.001431	0.001518	0.001529	0.000588	0.002329	0.001541	0.001739	0.003176	Atelocynus_microtis,Cerdocyon_thous,Lycalopex_culpaeus,Lycalopex_griseus,Lycalopex_gymnocercus,Lycalopex_vetulus	0
21	5	0.264882	335	37.2222	3.83018	0.936749	1	21.7374	0.001545	0.000741	0.000857	0.009624	0.000182	0.000193	0.000195	7.5e-05	0.000409	0.000196	0.000227	0.002549	Cerdocyon_thous,Lycalopex_culpaeus,Lycalopex_griseus,Lycalopex_gymnocercus,Lycalopex_vetulus	0
22	4	1.228	330	36.6667	3.16208	1.0019	1	9.40219	0.001128	0.000751	0.000852	0.001183	0.000845	0.000897	0.000903	0.000347	0.001385	0.000923	0.001047	0.001453	Lycalopex_culpaeus,Lycalopex_griseus,Lycalopex_gymnocercus,Lycalopex_vetulus	0
23	1	2.80932	338	37.5556	3.46719	1.00344	1	8.94626	0.00125	0.000742	0.00086	0.001942	0.001934	0.002051	0.002066	0.000794	0.003512	0.002085	0.002416	0.005456	Lycalopex_vetulus	0
24	3	1.21914	376	41.7778	3.75591	1.00283	1	10.1554	0.001508	0.000812	0.00089	0.004319	0.000839	0.00089	0.000897	0.000345	0.001838	0.000991	0.001085	0.005266	Lycalopex_culpaeus,Lycalopex_griseus,Lycalopex_gymnocercus	0
25	2	0.162036	408	45.3333	8.07589	1.801	1	86.9153	0.002049	0.000826	0.000924	0.00693	0.000112	0.000118	0.000119	4.6e-05	0.000332	0.000134	0.00015	0.001123	Lycalopex_culpaeus,Lycalopex_gymnocercus	0
26	1	1.42815	415	46.1111	5.37388	1.15623	1	18.9278	0.001938	0.000775	0.000932	0.005434	0.000983	0.001043	0.00105	0.000404	0.002768	0.001107	0.001331	0.00776	Lycalopex_culpaeus	0
27	1	1.42815	391	43.4444	4.28333	0.978317	1	13.7114	0.00154	0.00075	0.000907	0.002798	0.000983	0.001043	0.00105	0.000404	0.002199	0.001071	0.001296	0.003996	Lycalopex_gymnocercus	0
28	1	1.59018	420	46.6667	4.7117	1.11924	1	14.5561	0.001743	0.000785	0.000937	0.002523	0.001095	0.001161	0.00117	0.00045	0.002772	0.001248	0.00149	0.004012	Lycalopex_griseus	0
29	1	4.03732	312	34.6667	2.66677	1.01224	1	4.37132	0.001016	0.000758	0.000846	0.000823	0.002779	0.002947	0.002969	0.001141	0.004102	0.00306	0.003414	0.003322	Cerdocyon_thous	0
30	1	4.3022	301	33.4444	2.89962	1.03101	1	5.85046	0.001063	0.000747	0.000837	0.001185	0.002961	0.003141	0.003164	0.001216	0.004575	0.003214	0.003603	0.0051	Atelocynus_microtis	0
31	5	1.2237	335	37.2222	3.15618	0.961037	1	6.19454	0.001213	0.000749	0.000855	0.001418	0.000842	0.000893	0.0009	0.000346	0.001484	0.000917	0.001046	0.001735	Canis_adustus,Canis_aureus,Canis_latrans,Canis_lupus,Canis_mesomelas	0
32	2	1.92801	348	38.6667	3.65817	1.05202	1	8.37832	0.001539	0.000773	0.00086	0.00406	0.001327	0.001408	0.001418	0.000545	0.002967	0.00149	0.001658	0.007828	Canis_adustus,Canis_mesomelas	0
33	1	3.22927	339	37.6667	3.15454	0.963017	1	6.33014	0.001232	0.000738	0.000851	0.001959	0.002223	0.002358	0.002375	0.000913	0.003977	0.002384	0.002748	0.006325	Canis_adustus	0
34	1	3.22927	351	39	4.00038	0.999769	1	12.1508	0.001555	0.00078	0.000868	0.003946	0.002223	0.002358	0.002375	0.000913	0.005022	0.00252	0.002803	0.012743	Canis_mesomelas	0
35	3	1.85728	406	45.1111	4.23747	0.993248	1	9.26054	0.001785	0.000735	0.000919	0.003504	0.001278	0.001356	0.001366	0.000525	0.003315	0.001366	0.001707	0.006508	Canis_aureus,Canis_latrans,Canis_lupus	0
36	1	3.3	659	73.2222	13.5421	1.69321	5.64504	42.2211	0.00537	0.001075	0.002974	0.007315	0.002271	0.002409	0.002427	0.000933	0.017722	0.003548	0.009814	0.024138	Canis_lupus	0
37	2	1.0768	425	47.2222	5.39255	1.04893	1	13.1761	0.002425	0.000782	0.000937	0.007213	0.000741	0.000786	0.000792	0.000304	0.002612	0.000842	0.001009	0.007767	Canis_aureus,Canis_latrans	0
38	1	2.2232	404	44.8889	5.37248	0.725159	1	32.8079	0.00182	0.000792	0.000913	0.004147	0.00153	0.001623	0.001635	0.000628	0.004046	0.001761	0.002029	0.009219	Canis_latrans	0
39	1	2.2232	413	45.8889	4.35862	1.07407	1	9.75248	0.001772	0.000734	0.000925	0.003408	0.00153	0.001623	0.001635	0.000628	0.00394	0.001632	0.002056	0.007577	Canis_aureus	0
40	8	1.5	254	28.2222	3.38503	0.957708	1	15.0379	0.00114	0.000736	0.000822	0.003009	0.001032	0.001095	0.001103	0.000424	0.00171	0.001104	0.001233	0.004513	Otocyon_megalotis,Vulpes_chama,Vulpes_ferrilata,Vulpes_lagopus,Vulpes_rueppellii,Vulpes_velox,Vulpes_vulpes,Vulpes_zerda	0
41	1	11.1	259	28.7778	3.09371	0.95707	1	7.02554	0.001109	0.000748	0.000825	0.001719	0.00764	0.008104	0.008164	0.003138	0.012307	0.008304	0.009157	0.019082	Otocyon_megalotis	0
42	7	1e-05	277	30.7778	2.96344	1.02443	1	6.62788	0.001147	0.000756	0.000825	0.001786	0	0	0	0	0	0	0	0	Vulpes_chama,Vulpes_ferrilata,Vulpes_lagopus,Vulpes_rueppellii,Vulpes_velox,Vulpes_vulpes,Vulpes_zerda	0
43	1	11.1	268	29.7778	2.69932	1.01247	1	4.65787	0.001066	0.00073	0.000825	0.001763	0.00764	0.008104	0.008164	0.003138	0.011833	0.008104	0.009157	0.019564	Vulpes_ferrilata	0
44	6	4.2827	273	30.3333	2.61319	0.987519	1	4.84632	0.000976	0.000752	0.00082	0.001136	0.002948	0.003127	0.00315	0.001211	0.004178	0.003222	0.003513	0.004864	Vulpes_chama,Vulpes_lagopus,Vulpes_rueppellii,Vulpes_velox,Vulpes_vulpes,Vulpes_zerda	0
45	5	1.47933	278	30.8889	2.69516	1.00062	1	4.51133	0.001064	0.000745	0.000824	0.001503	0.001018	0.00108	0.001088	0.000418	0.001574	0.001102	0.001219	0.002224	Vulpes_lagopus,Vulpes_rueppellii,Vulpes_velox,Vulpes_vulpes,Vulpes_zerda	0
46	4	0.733307	297	33	3.20228	1.08391	1	10.8288	0.001065	0.000753	0.000828	0.001179	0.000505	0.000535	0.000539	0.000207	0.000781	0.000552	0.000607	0.000864	Vulpes_lagopus,Vulpes_rueppellii,Vulpes_velox,Vulpes_vulpes	0
47	2	2.79817	310	34.4444	3.15159	1.09206	1	10.7628	0.00111	0.00076	0.000827	0.001589	0.001926	0.002043	0.002058	0.000791	0.003107	0.002128	0.002314	0.004446	Vulpes_rueppellii,Vulpes_vulpes	0
48	1	1.8065	324	36	3.66951	1.06642	1	11.6763	0.001401	0.000748	0.000838	0.00257	0.001243	0.001319	0.001329	0.000511	0.002531	0.001352	0.001514	0.004643	Vulpes_vulpes	0
49	1	1.8065	326	36.2222	3.87731	0.955411	1	13.6934	0.001426	0.000752	0.000843	0.002645	0.001243	0.001319	0.001329	0.000511	0.002576	0.001359	0.001523	0.004778	Vulpes_rueppellii	0
50	2	2.35467	304	33.7778	3.40114	0.947915	1	12.644	0.00118	0.000749	0.000825	0.002498	0.001621	0.001719	0.001732	0.000666	0.002779	0.001763	0.001943	0.005882	Vulpes_lagopus,Vulpes_velox	0
51	1	2.25	298	33.1111	3.22348	0.829353	1	13.7614	0.001067	0.000746	0.000824	0.001511	0.001549	0.001643	0.001655	0.000636	0.0024	0.001679	0.001854	0.003399	Vulpes_lagopus	0
52	1	2.25	295	32.7778	3.06617	0.942937	1	8.1403	0.001085	0.000732	0.000824	0.00182	0.001549	0.001643	0.001655	0.000636	0.00244	0.001648	0.001853	0.004095	Vulpes_velox	0
53	1	5.33798	279	31	2.78657	0.992476	1	6.49838	0.001012	0.000743	0.000825	0.001123	0.003674	0.003897	0.003926	0.001509	0.005403	0.003968	0.004404	0.005994	Vulpes_zerda	0
54	1	6.8173	271	30.1111	2.72458	1.0295	1	5.00951	0.001031	0.000739	0.000825	0.001175	0.004692	0.004977	0.005014	0.001927	0.007027	0.005039	0.005624	0.008012	Vulpes_chama	0
55	1	12.6	236	26.2222	2.92888	1.21169	1	11.7857	0.000949	0.000737	0.000812	0.001069	0.008673	0.009199	0.009267	0.003562	0.011956	0.009281	0.010236	0.013467	Urocyon_cinereoargenteus	0
56	54	5.46868	249	27.6667	2.87125	1.05921	1	7.99629	0.000989	0.000756	0.000824	0.00097	0.003764	0.003992	0.004022	0.001546	0.005411	0.004135	0.004503	0.005304	Ailuropoda_melanoleuca,Ailurus_fulgens,Aonyx_capensis,Aonyx_cinerea,Bassaricyon_alleni,Bassaricyon_gabbii,Bassariscus_astutus,Bassariscus_sumichrasti,Conepatus_semistriatus,Eira_barbara,Enhydra_lutris,Galictis_cuja,Gulo_gulo,Helarctos_malayanus,Hydrictis_maculicollis,Ictonyx_libyca,Ictonyx_striatus,Lontra_canadensis,Lontra_felina,Lontra_longicaudis,Lutra_lutra,Lutra_sumatrana,Lutrogale_perspicill…	0
57	46	5.35148	251	27.8889	2.61735	1.01706	1	5.32356	0.000949	0.000757	0.000821	0.000945	0.003683	0.003907	0.003936	0.001513	0.005077	0.004052	0.004396	0.005059	Ailurus_fulgens,Aonyx_capensis,Aonyx_cinerea,Bassaricyon_alleni,Bassaricyon_gabbii,Bassariscus_astutus,Bassariscus_sumichrasti,Conepatus_semistriatus,Eira_barbara,Enhydra_lutris,Galictis_cuja,Gulo_gulo,Hydrictis_maculicollis,Ictonyx_libyca,Ictonyx_striatus,Lontra_canadensis,Lontra_felina,Lontra_longicaudis,Lutra_lutra,Lutra_sumatrana,Lutrogale_perspicillata,Martes_americana,Martes_flavigula,Marte…	0
58	42	0.871556	271	30.1111	2.9535	0.96646	1	6.61424	0.001194	0.000753	0.000822	0.002291	0.0006	0.000636	0.000641	0.000246	0.001041	0.000656	0.000716	0.001997	Ailurus_fulgens,Aonyx_capensis,Aonyx_cinerea,Bassaricyon_alleni,Bassaricyon_gabbii,Bassariscus_astutus,Bassariscus_sumichrasti,Eira_barbara,Enhydra_lutris,Galictis_cuja,Gulo_gulo,Hydrictis_maculicollis,Ictonyx_libyca,Ictonyx_striatus,Lontra_canadensis,Lontra_felina,Lontra_longicaudis,Lutra_lutra,Lutra_sumatrana,Lutrogale_perspicillata,Martes_americana,Martes_flavigula,Martes_foina,Martes_martes,M…	0
59	41	4.6932	254	28.2222	2.54946	1.01184	1	4.40632	0.000949	0.000752	0.000819	0.000772	0.00323	0.003426	0.003452	0.001327	0.004453	0.003527	0.003844	0.003623	Aonyx_capensis,Aonyx_cinerea,Bassaricyon_alleni,Bassaricyon_gabbii,Bassariscus_astutus,Bassariscus_sumichrasti,Eira_barbara,Enhydra_lutris,Galictis_cuja,Gulo_gulo,Hydrictis_maculicollis,Ictonyx_libyca,Ictonyx_striatus,Lontra_canadensis,Lontra_felina,Lontra_longicaudis,Lutra_lutra,Lutra_sumatrana,Lutrogale_perspicillata,Martes_americana,Martes_flavigula,Martes_foina,Martes_martes,Martes_pennanti,M…	0
60	9	6.6645	259	28.7778	2.64273	1.00377	1	5.35768	0.000996	0.000741	0.000819	0.001736	0.004587	0.004865	0.004902	0.001884	0.00664	0.004939	0.005458	0.01157	Bassaricyon_alleni,Bassaricyon_gabbii,Bassariscus_astutus,Bassariscus_sumichrasti,Nasua_nasua,Nasuella_olivacea,Potos_flavus,Procyon_cancrivorus,Procyon_lotor	0
61	1	22.707	256	28.4444	2.45239	1.00512	1	4.15552	0.000907	0.000763	0.000817	0.000813	0.015629	0.016577	0.016701	0.006419	0.020593	0.017335	0.018544	0.018455	Potos_flavus	0
62	8	3.16073	268	29.7778	2.88288	1.01412	1	7.28624	0.001017	0.000758	0.000822	0.001272	0.002176	0.002308	0.002325	0.000893	0.003213	0.002396	0.002598	0.004022	Bassaricyon_alleni,Bassaricyon_gabbii,Bassariscus_astutus,Bassariscus_sumichrasti,Nasua_nasua,Nasuella_olivacea,Procyon_cancrivorus,Procyon_lotor	0
63	4	4.65376	294	32.6667	2.89407	1.03386	1	5.49711	0.001141	0.000754	0.000829	0.001706	0.003203	0.003397	0.003423	0.001315	0.005311	0.003511	0.003858	0.007938	Bassariscus_astutus,Bassariscus_sumichrasti,Procyon_cancrivorus,Procyon_lotor	0
64	2	11.4869	304	33.7778	2.99761	0.969839	1	6.38778	0.001103	0.000763	0.000832	0.001197	0.007906	0.008386	0.008449	0.003247	0.012665	0.008767	0.009557	0.013748	Procyon_cancrivorus,Procyon_lotor	0
65	1	3.40564	314	34.8889	3.2065	0.99162	1	6.57444	0.001275	0.000776	0.000842	0.002055	0.002344	0.002486	0.002505	0.000963	0.004341	0.002643	0.002869	0.006998	Procyon_cancrivorus	0
66	1	3.40564	335	37.2222	3.69471	0.957222	1	8.26353	0.001447	0.00076	0.000851	0.002372	0.002344	0.002486	0.002505	0.000963	0.00493	0.002588	0.002898	0.008077	Procyon_lotor	0
67	2	7.5927	300	33.3333	2.94836	1.05611	1	6.35956	0.001058	0.000758	0.000832	0.001087	0.005226	0.005543	0.005584	0.002146	0.008033	0.005756	0.006317	0.008252	Bassariscus_astutus,Bassariscus_sumichrasti	0
68	1	7.29982	306	34	3.30648	1.00957	1	10.2965	0.001133	0.000769	0.000832	0.001689	0.005024	0.005329	0.005369	0.002063	0.008273	0.005615	0.006073	0.01233	Bassariscus_sumichrasti	0
69	1	7.29982	295	32.7778	2.86363	1.05494	1	6.13303	0.001058	0.000759	0.000827	0.00116	0.005024	0.005329	0.005369	0.002063	0.007725	0.005538	0.006037	0.008468	Bassariscus_astutus	0
70	4	4.64628	292	32.4444	2.82254	1.0129	1	6.36911	0.001112	0.000804	0.000825	0.003174	0.003198	0.003392	0.003417	0.001313	0.005169	0.003736	0.003833	0.014746	Bassaricyon_alleni,Bassaricyon_gabbii,Nasua_nasua,Nasuella_olivacea	0
71	2	5.7	315	35	3.32596	0.934449	1	8.14992	0.001264	0.000769	0.000832	0.00187	0.003923	0.004161	0.004192	0.001611	0.007204	0.004385	0.004742	0.010661	Nasua_nasua,Nasuella_olivacea	0
72	1	9.2	290	32.2222	2.60082	1.00368	1	4.54894	0.000966	0.000759	0.000825	0.000767	0.006332	0.006716	0.006767	0.002601	0.008888	0.00698	0.00759	0.007053	Nasua_nasua	0
73	1	9.2	306	34	3.03048	0.994708	1	5.83846	0.001217	0.000774	0.000831	0.002118	0.006332	0.006716	0.006767	0.002601	0.011193	0.00712	0.007645	0.01949	Nasuella_olivacea	0
74	2	6.35743	319	35.4444	2.99937	1.00191	1	5.43192	0.00123	0.00077	0.000835	0.001883	0.004376	0.004641	0.004676	0.001797	0.007822	0.004893	0.005308	0.011972	Bassaricyon_alleni,Bassaricyon_gabbii	0
75	1	8.54257	310	34.4444	2.95267	0.97831	1	5.3702	0.00121	0.000739	0.000831	0.002218	0.00588	0.006237	0.006283	0.002415	0.010334	0.006314	0.007099	0.01895	Bassaricyon_gabbii	0
76	1	8.54257	296	32.8889	2.64128	1.00403	1	4.43556	0.001028	0.000751	0.000827	0.001113	0.00588	0.006237	0.006283	0.002415	0.008781	0.006412	0.007065	0.009508	Bassaricyon_alleni	0
77	32	6.97152	259	28.7778	2.55648	0.993156	1	4.73643	0.000961	0.000743	0.000811	0.00116	0.004798	0.00509	0.005128	0.001971	0.006703	0.005181	0.005654	0.008086	Aonyx_capensis,Aonyx_cinerea,Eira_barbara,Enhydra_lutris,Galictis_cuja,Gulo_gulo,Hydrictis_maculicollis,Ictonyx_libyca,Ictonyx_striatus,Lontra_canadensis,Lontra_felina,Lontra_longicaudis,Lutra_lutra,Lutra_sumatrana,Lutrogale_perspicillata,Martes_americana,Martes_flavigula,Martes_foina,Martes_martes,Martes_pennanti,Meles_meles,Mellivora_capensis,Mustela_africana,Mustela_altaica,Mustela_erminea,Mus…	0
78	31	1e-05	271	30.1111	3.20536	1.10952	1	12.2506	0.001096	0.000746	0.000822	0.001785	0	0	0	0	0	0	0	0	Aonyx_capensis,Aonyx_cinerea,Eira_barbara,Enhydra_lutris,Galictis_cuja,Gulo_gulo,Hydrictis_maculicollis,Ictonyx_libyca,Ictonyx_striatus,Lontra_canadensis,Lontra_felina,Lontra_longicaudis,Lutra_lutra,Lutra_sumatrana,Lutrogale_perspicillata,Martes_americana,Martes_flavigula,Martes_foina,Martes_martes,Martes_pennanti,Meles_meles,Mellivora_capensis,Mustela_africana,Mustela_altaica,Mustela_erminea,Mus…	0
79	30	2	275	30.5556	3.12237	0.935772	1	13.1787	0.001051	0.000759	0.000814	0.001615	0.001377	0.00146	0.001471	0.000565	0.002102	0.001519	0.001628	0.00323	Aonyx_capensis,Aonyx_cinerea,Eira_barbara,Enhydra_lutris,Galictis_cuja,Gulo_gulo,Hydrictis_maculicollis,Ictonyx_libyca,Ictonyx_striatus,Lontra_canadensis,Lontra_felina,Lontra_longicaudis,Lutra_lutra,Lutra_sumatrana,Lutrogale_perspicillata,Martes_americana,Martes_flavigula,Martes_foina,Martes_martes,Martes_pennanti,Meles_meles,Mustela_africana,Mustela_altaica,Mustela_erminea,Mustela_frenata,Mustel…	0
80	29	1e-05	281	31.2222	3.22935	0.952547	1	9.87466	0.001196	0.000737	0.00082	0.002294	0	0	0	0	0	0	0	0	Aonyx_capensis,Aonyx_cinerea,Eira_barbara,Enhydra_lutris,Galictis_cuja,Gulo_gulo,Hydrictis_maculicollis,Ictonyx_libyca,Ictonyx_striatus,Lontra_canadensis,Lontra_felina,Lontra_longicaudis,Lutra_lutra,Lutra_sumatrana,Lutrogale_perspicillata,Martes_americana,Martes_flavigula,Martes_foina,Martes_martes,Martes_pennanti,Mustela_africana,Mustela_altaica,Mustela_erminea,Mustela_frenata,Mustela_lutreola,M…	0
81	7	9.63525	287	31.8889	2.3939	0.98146	1	3.96809	0.000904	0.000754	0.000811	0.00066	0.006632	0.007034	0.007087	0.002724	0.008709	0.007267	0.007819	0.006357	Eira_barbara,Gulo_gulo,Martes_americana,Martes_flavigula,Martes_foina,Martes_martes,Martes_pennanti	0
82	1	10.7648	281	31.2222	2.6702	0.979067	1	5.2011	0.000988	0.000749	0.000813	0.001235	0.007409	0.007859	0.007917	0.003043	0.010631	0.008059	0.008752	0.013291	Eira_barbara	0
83	6	0.38495	295	32.7778	3.0427	1.08193	1	10.2987	0.001043	0.00075	0.000817	0.001426	0.000265	0.000281	0.000283	0.000109	0.000402	0.000289	0.000314	0.000549	Gulo_gulo,Martes_americana,Martes_flavigula,Martes_foina,Martes_martes,Martes_pennanti	0
84	5	1.5398	309	34.3333	2.81509	0.921681	1	8.9718	0.001015	0.000748	0.000817	0.001315	0.00106	0.001124	0.001133	0.000435	0.001563	0.001151	0.001258	0.002025	Martes_americana,Martes_flavigula,Martes_foina,Martes_martes,Martes_pennanti	0
85	4	1e-05	317	35.2222	3.38655	1.13397	1	14.398	0.001161	0.000745	0.000819	0.002399	0	0	0	0	0	0	0	0	Martes_americana,Martes_flavigula,Martes_foina,Martes_martes	0
86	1	8.84	300	33.3333	2.39715	0.999673	1	4.02928	0.000899	0.000749	0.000806	0.000899	0.006085	0.006454	0.006502	0.002499	0.00795	0.006618	0.007129	0.007944	Martes_flavigula	0
87	3	4.68591	331	36.7778	3.0057	0.910509	1	9.84492	0.001058	0.000748	0.000813	0.001699	0.003225	0.003421	0.003446	0.001325	0.004959	0.003504	0.003809	0.007959	Martes_americana,Martes_foina,Martes_martes	0
88	2	0.422679	346	38.4444	3.18978	1.07255	1	10.6126	0.001292	0.000762	0.000818	0.003389	0.000291	0.000309	0.000311	0.000119	0.000546	0.000322	0.000346	0.001433	Martes_americana,Martes_martes	0
89	1	3.73141	329	36.5556	2.70727	1.00288	1	5.33891	0.001046	0.000742	0.000817	0.001491	0.002568	0.002724	0.002744	0.001055	0.003902	0.002768	0.003047	0.005562	Martes_americana	0
90	1	3.73141	340	37.7778	2.85651	1.00152	1	5.66507	0.001111	0.000757	0.000819	0.001693	0.002568	0.002724	0.002744	0.001055	0.004146	0.002823	0.003056	0.006318	Martes_martes	0
91	1	4.15409	327	36.3333	2.61723	0.972259	1	5.19427	0.000984	0.000751	0.000807	0.00106	0.002859	0.003033	0.003055	0.001174	0.004088	0.003122	0.003353	0.004403	Martes_foina	0
92	1	8.84	307	34.1111	2.46774	0.996462	1	4.16213	0.000952	0.000752	0.000808	0.001113	0.006085	0.006454	0.006502	0.002499	0.008416	0.006644	0.007147	0.009841	Martes_pennanti	0
93	1	10.3798	292	32.4444	2.43356	0.997154	1	4.02101	0.000931	0.000751	0.000811	0.000874	0.007144	0.007578	0.007634	0.002934	0.009668	0.00779	0.008418	0.009076	Gulo_gulo	0
94	22	1e-05	287	31.8889	3.23672	1.13315	1	12.9975	0.001161	0.000742	0.000819	0.002632	0	0	0	0	0	0	0	0	Aonyx_capensis,Aonyx_cinerea,Enhydra_lutris,Galictis_cuja,Hydrictis_maculicollis,Ictonyx_libyca,Ictonyx_striatus,Lontra_canadensis,Lontra_felina,Lontra_longicaudis,Lutra_lutra,Lutra_sumatrana,Lutrogale_perspicillata,Mustela_africana,Mustela_altaica,Mustela_erminea,Mustela_frenata,Mustela_lutreola,Mustela_nivalis,Mustela_putorius,Neovison_vison,Pteronura_brasiliensis	0
95	14	6.4	290	32.2222	2.59129	1.01817	1	4.454	0.001007	0.000758	0.000819	0.001307	0.004405	0.004672	0.004707	0.001809	0.006445	0.00485	0.005242	0.008367	Aonyx_capensis,Aonyx_cinerea,Enhydra_lutris,Galictis_cuja,Hydrictis_maculicollis,Ictonyx_libyca,Ictonyx_striatus,Lontra_canadensis,Lontra_felina,Lontra_longicaudis,Lutra_lutra,Lutra_sumatrana,Lutrogale_perspicillata,Pteronura_brasiliensis	0
96	11	4.4647	296	32.8889	2.90756	0.975763	1	7.80676	0.00103	0.000736	0.00082	0.0015	0.003073	0.003259	0.003284	0.001262	0.004598	0.003288	0.003662	0.006696	Aonyx_capensis,Aonyx_cinerea,Enhydra_lutris,Hydrictis_maculicollis,Lontra_canadensis,Lontra_felina,Lontra_longicaudis,Lutra_lutra,Lutra_sumatrana,Lutrogale_perspicillata,Pteronura_brasiliensis	0
97	1	9.5353	293	32.5556	2.86117	0.994366	1	7.61963	0.000999	0.000758	0.000821	0.001154	0.006563	0.006961	0.007013	0.002695	0.009528	0.007229	0.007825	0.011006	Pteronura_brasiliensis	0
98	10	1.0653	298	33.1111	3.1162	1.0239	1	9.97077	0.001105	0.000752	0.000824	0.001879	0.000733	0.000778	0.000784	0.000301	0.001177	0.000801	0.000877	0.002001	Aonyx_capensis,Aonyx_cinerea,Enhydra_lutris,Hydrictis_maculicollis,Lontra_canadensis,Lontra_felina,Lontra_longicaudis,Lutra_lutra,Lutra_sumatrana,Lutrogale_perspicillata	0
99	7	1e-05	313	34.7778	3.31789	1.04016	1	11.0787	0.001159	0.000744	0.000824	0.002217	0	0	0	0	0	0	0	0	Aonyx_capensis,Aonyx_cinerea,Enhydra_lutris,Hydrictis_maculicollis,Lutra_lutra,Lutra_sumatrana,Lutrogale_perspicillata	0
100	6	3.03449	313	34.7778	2.83618	1.04153	1	7.98258	0.000996	0.000753	0.000819	0.001241	0.002089	0.002215	0.002232	0.000858	0.003022	0.002286	0.002487	0.003764	Aonyx_capensis,Aonyx_cinerea,Hydrictis_maculicollis,Lutra_lutra,Lutra_sumatrana,Lutrogale_perspicillata	0
101	5	0.037812	325	36.1111	5.7571	2.5742	1	88.7638	0.001267	0.000797	0.000822	0.004767	2.6e-05	2.8e-05	2.8e-05	1.1e-05	4.8e-05	3e-05	3.1e-05	0.00018	Aonyx_capensis,Aonyx_cinerea,Lutra_lutra,Lutra_sumatrana,Lutrogale_perspicillata	0
102	3	1.18724	355	39.4444	3.28853	0.99685	1	7.10587	0.001319	0.000744	0.000832	0.002439	0.000817	0.000867	0.000873	0.000336	0.001567	0.000884	0.000988	0.002896	Aonyx_capensis,Aonyx_cinerea,Lutrogale_perspicillata	0
103	2	0.877613	354	39.3333	3.45057	0.935354	1	11.5051	0.001248	0.000764	0.000828	0.003009	0.000604	0.000641	0.000645	0.000248	0.001096	0.000671	0.000727	0.002641	Aonyx_capensis,Aonyx_cinerea	0
104	1	3.33284	350	38.8889	2.80556	0.976223	1	5.80126	0.001044	0.000749	0.000825	0.001041	0.002294	0.002433	0.002451	0.000942	0.003479	0.002495	0.00275	0.003468	Aonyx_cinerea	0
105	1	3.33284	352	39.1111	2.85647	0.971786	1	6.10241	0.001086	0.000764	0.000827	0.001435	0.002294	0.002433	0.002451	0.000942	0.00362	0.002545	0.002756	0.004781	Aonyx_capensis	0
106	1	4.21045	355	39.4444	3.06516	0.99607	1	6.09237	0.001203	0.000745	0.000831	0.001751	0.002898	0.003074	0.003097	0.00119	0.005067	0.003137	0.003499	0.007373	Lutrogale_perspicillata	0
107	2	2.26554	337	37.4444	2.71548	1.02049	1	5.64279	0.000986	0.000751	0.000819	0.000977	0.001559	0.001654	0.001666	0.00064	0.002235	0.001702	0.001857	0.002212	Lutra_lutra,Lutra_sumatrana	0
108	1	3.13216	339	37.6667	2.69332	0.990013	1	5.58608	0.000982	0.000757	0.000822	0.001084	0.002156	0.002287	0.002304	0.000885	0.003077	0.002372	0.002575	0.003395	Lutra_sumatrana	0
109	1	3.13216	333	37	2.96724	0.911555	1	8.78811	0.001004	0.000742	0.00082	0.001097	0.002156	0.002287	0.002304	0.000885	0.003144	0.002323	0.002569	0.003437	Lutra_lutra	0
110	1	5.43551	314	34.8889	2.84824	0.990043	1	6.28844	0.001026	0.000755	0.000824	0.001202	0.003741	0.003968	0.003998	0.001536	0.005577	0.004102	0.004479	0.006534	Hydrictis_maculicollis	0
111	1	8.47	333	37	3.38249	1.00851	1	7.56321	0.001343	0.000768	0.000832	0.002526	0.00583	0.006184	0.00623	0.002394	0.011378	0.006502	0.007051	0.021394	Enhydra_lutris	0
112	3	3.76853	308	34.2222	2.66343	0.989162	1	5.45982	0.00098	0.000746	0.00082	0.00088	0.002594	0.002751	0.002772	0.001065	0.003692	0.002811	0.003091	0.003317	Lontra_canadensis,Lontra_felina,Lontra_longicaudis	0
113	1	4.70147	308	34.2222	2.55294	1.00952	1	4.68691	0.000967	0.000735	0.000813	0.001441	0.003236	0.003432	0.003458	0.001329	0.004549	0.003456	0.003822	0.006775	Lontra_canadensis	0
114	2	2.33605	327	36.3333	2.74687	1.02023	1	5.51689	0.001031	0.000743	0.000825	0.001188	0.001608	0.001705	0.001718	0.00066	0.002408	0.001736	0.001927	0.002775	Lontra_felina,Lontra_longicaudis	0
115	1	2.36542	333	37	2.94408	1.02751	1	7.08289	0.001115	0.000741	0.000831	0.001555	0.001628	0.001727	0.00174	0.000669	0.002638	0.001753	0.001964	0.003678	Lontra_felina	0
116	1	2.36542	335	37.2222	2.80764	1.0026	1	5.31762	0.001075	0.000743	0.000827	0.001121	0.001628	0.001727	0.00174	0.000669	0.002544	0.001757	0.001956	0.002651	Lontra_longicaudis	0
117	3	1e-05	304	33.7778	3.11212	1.12221	1	12.7216	0.001079	0.000776	0.000827	0.001508	0	0	0	0	0	0	0	0	Galictis_cuja,Ictonyx_libyca,Ictonyx_striatus	0
118	1	14	301	33.4444	2.72302	1.02415	1	4.97408	0.001023	0.00075	0.000825	0.001123	0.009636	0.010221	0.010297	0.003957	0.01432	0.010496	0.01155	0.015719	Galictis_cuja	0
119	2	7.30687	328	36.4444	3.34767	0.997947	1	8.93632	0.001329	0.000743	0.000834	0.002454	0.005029	0.005334	0.005374	0.002065	0.009712	0.005428	0.006094	0.017935	Ictonyx_libyca,Ictonyx_striatus	0
120	1	6.69313	351	39	3.86658	1.04108	1	10.0337	0.001505	0.000762	0.000849	0.002658	0.004607	0.004886	0.004923	0.001892	0.010071	0.005101	0.005682	0.017788	Ictonyx_libyca	0
121	1	6.69313	318	35.3333	3.19042	1.01902	1	9.36637	0.001161	0.000759	0.000832	0.001819	0.004607	0.004886	0.004923	0.001892	0.00777	0.005079	0.005569	0.012175	Ictonyx_striatus	0
122	8	12.085	293	32.5556	2.58011	1.00934	1	4.71057	0.00095	0.000743	0.00082	0.000781	0.008318	0.008823	0.008889	0.003416	0.011484	0.008981	0.009912	0.00944	Mustela_africana,Mustela_altaica,Mustela_erminea,Mustela_frenata,Mustela_lutreola,Mustela_nivalis,Mustela_putorius,Neovison_vison	0
123	3	1.82762	370	41.1111	5.00518	1.11909	1	16.724	0.001905	0.000751	0.000863	0.00358	0.001258	0.001334	0.001344	0.000517	0.003481	0.001373	0.001577	0.006542	Mustela_africana,Mustela_frenata,Neovison_vison	0
124	2	0.920686	360	40	6.99067	0.611544	1	51.9914	0.001881	0.000722	0.000855	0.005949	0.000634	0.000672	0.000677	0.00026	0.001732	0.000665	0.000787	0.005478	Mustela_africana,Mustela_frenata	0
125	1	5.56667	325	36.1111	3.4171	0.951296	1	9.86527	0.001261	0.000739	0.000832	0.002597	0.003832	0.004064	0.004094	0.001574	0.007017	0.004116	0.004634	0.014455	Mustela_africana	0
126	1	5.56667	324	36	3.40175	1.01603	1	10.2139	0.001243	0.000748	0.000831	0.002716	0.003832	0.004064	0.004094	0.001574	0.006919	0.004165	0.004623	0.015117	Mustela_frenata	0
127	1	6.48735	305	33.8889	3.0248	0.853226	1	12.6377	0.001028	0.000732	0.000823	0.001643	0.004465	0.004736	0.004771	0.001834	0.006672	0.004746	0.005339	0.010656	Neovison_vison	0
128	5	2.69878	363	40.3333	5.34246	0.94463	1	17.2221	0.001889	0.000759	0.000873	0.003466	0.001858	0.00197	0.001985	0.000763	0.005098	0.002049	0.002355	0.009353	Mustela_altaica,Mustela_erminea,Mustela_lutreola,Mustela_nivalis,Mustela_putorius	0
129	4	0.644139	335	37.2222	2.81778	1.01255	1	4.91806	0.001111	0.000755	0.000837	0.001315	0.000443	0.00047	0.000474	0.000182	0.000716	0.000486	0.000539	0.000847	Mustela_altaica,Mustela_lutreola,Mustela_nivalis,Mustela_putorius	0
130	2	0.8132	360	40	3.45322	0.951348	1	7.39821	0.00138	0.000755	0.000849	0.002062	0.00056	0.000594	0.000598	0.00023	0.001123	0.000614	0.00069	0.001677	Mustela_altaica,Mustela_nivalis	0
131	1	4.15886	335	37.2222	2.85897	1.01652	1	5.13509	0.001085	0.000757	0.000837	0.001072	0.002863	0.003036	0.003059	0.001176	0.004514	0.003147	0.003481	0.00446	Mustela_nivalis	0
132	1	4.15886	349	38.7778	3.08001	1.01781	1	5.82996	0.001186	0.000768	0.000849	0.001503	0.002863	0.003036	0.003059	0.001176	0.004933	0.003195	0.003531	0.006252	Mustela_altaica	0
133	2	3.11206	354	39.3333	3.50637	0.958026	1	11.1573	0.001268	0.000743	0.000848	0.001929	0.002142	0.002272	0.002289	0.00088	0.003946	0.002313	0.00264	0.006002	Mustela_lutreola,Mustela_putorius	0
134	1	1.86	356	39.5556	3.52048	0.931299	1	11.2987	0.001258	0.000751	0.000849	0.001792	0.00128	0.001358	0.001368	0.000526	0.00234	0.001396	0.001579	0.003333	Mustela_putorius	0
135	1	1.86	354	39.3333	4.92123	1.39333	1	36.9015	0.001442	0.000755	0.000849	0.003541	0.00128	0.001358	0.001368	0.000526	0.002682	0.001404	0.001579	0.006586	Mustela_lutreola	0
136	1	5.6162	303	33.6667	2.95639	0.953596	1	9.63491	0.001017	0.00075	0.000825	0.00112	0.003866	0.0041	0.004131	0.001588	0.005711	0.00421	0.004636	0.006291	Mustela_erminea	0
137	1	20.4	262	29.1111	2.49043	1.00193	1	4.74157	0.000907	0.000761	0.00081	0.000908	0.014041	0.014893	0.015004	0.005767	0.01851	0.015533	0.016522	0.018526	Meles_meles	0
138	1	22.4	256	28.4444	2.36615	0.996731	1	3.94341	0.000868	0.000746	0.000808	0.00035	0.015418	0.016353	0.016475	0.006332	0.019452	0.016713	0.01811	0.007833	Mellivora_capensis	0
139	1	22.4	269	29.8889	2.81828	1.08653	1	8.93053	0.000981	0.000739	0.000813	0.000973	0.015418	0.016353	0.016475	0.006332	0.021981	0.016562	0.018211	0.021796	Taxidea_taxus	0
140	1	34.0647	249	27.6667	2.50399	1.02299	1	4.41175	0.000924	0.000745	0.000817	0.000656	0.023447	0.024869	0.025055	0.009629	0.031467	0.025383	0.027834	0.022358	Ailurus_fulgens	0
141	4	15.4853	303	33.6667	4.06248	0.914426	1	15.4955	0.001333	0.000752	0.000841	0.002301	0.010658	0.011305	0.011389	0.004377	0.020642	0.011648	0.013018	0.035625	Conepatus_semistriatus,Mephitis_macroura,Mephitis_mephitis,Mydaus_javanensis	0
142	1	19.451	308	34.2222	3.72347	0.919429	1	9.67242	0.001381	0.000764	0.000849	0.002804	0.013388	0.0142	0.014306	0.005498	0.02686	0.014857	0.016514	0.054538	Mydaus_javanensis	0
143	3	8.08906	298	33.1111	3.29375	0.987784	1	9.82157	0.001125	0.000759	0.000842	0.001493	0.005568	0.005905	0.00595	0.002287	0.009103	0.006136	0.006815	0.012079	Conepatus_semistriatus,Mephitis_macroura,Mephitis_mephitis	0
144	2	8.19024	318	35.3333	3.65989	1.14828	1	14.8645	0.00134	0.000741	0.000849	0.003379	0.005637	0.005979	0.006024	0.002315	0.010975	0.006069	0.006954	0.027676	Mephitis_macroura,Mephitis_mephitis	0
145	1	3.17171	339	37.6667	4.19549	0.898417	1	13.3754	0.001472	0.000767	0.000873	0.002266	0.002183	0.002316	0.002333	0.000897	0.004667	0.002432	0.002767	0.007188	Mephitis_mephitis	0
146	1	3.17171	331	36.7778	3.36056	0.985286	1	6.94455	0.001311	0.000758	0.000854	0.002166	0.002183	0.002316	0.002333	0.000897	0.004158	0.002404	0.002708	0.00687	Mephitis_macroura	0
147	1	11.3619	308	34.2222	3.17645	1.02874	1	7.15974	0.001142	0.000747	0.000842	0.001469	0.00782	0.008295	0.008357	0.003212	0.012979	0.008485	0.009572	0.016686	Conepatus_semistriatus	0
148	8	15.819	315	35	3.16527	1.03133	1	6.4932	0.001194	0.000753	0.000853	0.001668	0.010888	0.011549	0.011635	0.004472	0.01889	0.011908	0.013499	0.026391	Ailuropoda_melanoleuca,Helarctos_malayanus,Melursus_ursinus,Tremarctos_ornatus,Ursus_americanus,Ursus_arctos,Ursus_maritimus,Ursus_thibetanus	0
149	1	24.4687	315	35	3.40515	0.949572	1	8.57931	0.001292	0.000768	0.000857	0.001863	0.016842	0.017863	0.017997	0.006917	0.031612	0.0188	0.02097	0.045583	Ailuropoda_melanoleuca	0
150	7	8.9522	392	43.5556	4.55248	0.952292	1	11.7265	0.001853	0.000746	0.000924	0.005316	0.006162	0.006536	0.006584	0.002531	0.016587	0.006679	0.008276	0.047589	Helarctos_malayanus,Melursus_ursinus,Tremarctos_ornatus,Ursus_americanus,Ursus_arctos,Ursus_maritimus,Ursus_thibetanus	0
151	6	8.79506	496	55.1111	5.05004	1.1028	1.66381	9.50186	0.002089	0.000885	0.001068	0.002501	0.006054	0.006421	0.006469	0.002486	0.018376	0.007781	0.009392	0.022	Helarctos_malayanus,Melursus_ursinus,Ursus_americanus,Ursus_arctos,Ursus_maritimus,Ursus_thibetanus	0
152	5	0.476805	585	65	8.78187	1.23323	3.09551	20.9772	0.003594	0.000972	0.001325	0.007156	0.000328	0.000348	0.000351	0.000135	0.001714	0.000463	0.000632	0.003412	Helarctos_malayanus,Ursus_americanus,Ursus_arctos,Ursus_maritimus,Ursus_thibetanus	0
153	3	0.095484	597	66.3333	8.96527	1.22334	3.22497	21.946	0.003635	0.000957	0.001481	0.008885	6.6e-05	7e-05	7e-05	2.7e-05	0.000347	9.1e-05	0.000141	0.000848	Helarctos_malayanus,Ursus_americanus,Ursus_thibetanus	0
154	2	0.903146	603	67	10.496	1.8772	3.29112	48.6643	0.004822	0.001319	0.001541	0.032292	0.000622	0.000659	0.000664	0.000255	0.004355	0.001192	0.001392	0.029165	Ursus_americanus,Ursus_thibetanus	0
155	1	5.24604	604	67.1111	9.6914	0.900851	3.17599	47.673	0.004314	0.001422	0.001485	0.031112	0.003611	0.00383	0.003858	0.001483	0.022631	0.007462	0.00779	0.163212	Ursus_thibetanus	0
156	1	5.24604	601	66.7778	10.8658	1.05153	3.23288	64.8018	0.004573	0.000568	0.001471	0.031897	0.003611	0.00383	0.003858	0.001483	0.023988	0.00298	0.007719	0.167333	Ursus_americanus	0
157	1	6.14919	681	75.6667	14.0302	1.58437	4.80276	73.1822	0.005664	0.001166	0.002674	0.022532	0.004232	0.004489	0.004523	0.001738	0.034829	0.007171	0.016443	0.138553	Helarctos_malayanus	0
158	2	5.07618	586	65.1111	7.80875	1.17675	2.99843	24.0682	0.003227	0.001071	0.001293	0.011018	0.003494	0.003706	0.003734	0.001435	0.016382	0.005436	0.006563	0.055931	Ursus_arctos,Ursus_maritimus	0
159	1	1.16849	593	65.8889	8.17183	1.15472	3.13043	26.9909	0.003339	0.000964	0.001354	0.008991	0.000804	0.000853	0.000859	0.00033	0.003901	0.001126	0.001583	0.010505	Ursus_arctos	0
160	1	1.16849	588	65.3333	7.96772	1.35982	3.0905	22.4071	0.003159	0.000976	0.001314	0.005661	0.000804	0.000853	0.000859	0.00033	0.003691	0.00114	0.001535	0.006614	Ursus_maritimus	0
161	1	6.72148	556	61.7778	9.01475	1.26576	2.79954	32.4876	0.00354	0.001034	0.001223	0.010495	0.004626	0.004907	0.004944	0.0019	0.023794	0.006947	0.008218	0.070542	Melursus_ursinus	0
162	1	15.5165	387	43	4.02506	1.0432	1	8.9447	0.001547	0.000787	0.000918	0.001743	0.01068	0.011328	0.011412	0.004386	0.024007	0.012205	0.014247	0.02705	Tremarctos_ornatus	0
163	84	8.04343	249	27.6667	2.69841	1.00572	1	5.04091	0.001039	0.000735	0.000824	0.001523	0.005536	0.005872	0.005916	0.002274	0.008355	0.005915	0.006624	0.012254	Acinonyx_jubatus,Arctictis_binturong,Arctogalidia_trivirgata,Bdeogale_crassicauda,Caracal_aurata,Caracal_caracal,Civettictis_civetta,Crocuta_crocuta,Crossarchus_platycephalus,Cryptoprocta_ferox,Cynictis_penicillata,Cynogale_bennettii,Dinofelis_cristata,Eupleres_goudotii,FAM_62192,Felis_catus,Felis_chaus,Felis_margarita,Felis_nigripes,Felis_silvestris,Fossa_fossana,Galerella_pulverulenta,Galidia_e…	0
164	1	46.9168	244	27.1111	2.56304	0.984161	1	4.34969	0.000963	0.000735	0.000816	0.001145	0.032293	0.034252	0.034507	0.013262	0.045193	0.034481	0.038289	0.053716	Nandinia_binotata	0
165	83	6.21678	250	27.7778	2.78281	1.01615	1	5.04057	0.001087	0.000721	0.000824	0.002007	0.004279	0.004539	0.004572	0.001757	0.00676	0.004485	0.005123	0.012475	Acinonyx_jubatus,Arctictis_binturong,Arctogalidia_trivirgata,Bdeogale_crassicauda,Caracal_aurata,Caracal_caracal,Civettictis_civetta,Crocuta_crocuta,Crossarchus_platycephalus,Cryptoprocta_ferox,Cynictis_penicillata,Cynogale_bennettii,Dinofelis_cristata,Eupleres_goudotii,FAM_62192,Felis_catus,Felis_chaus,Felis_margarita,Felis_nigripes,Felis_silvestris,Fossa_fossana,Galerella_pulverulenta,Galidia_e…	0
166	34	1e-05	282	31.3333	3.43763	1.07006	1	16.6254	0.001235	0.000726	0.000825	0.00224	0	0	0	0	0	0	0	0	Arctictis_binturong,Arctogalidia_trivirgata,Bdeogale_crassicauda,Civettictis_civetta,Crocuta_crocuta,Crossarchus_platycephalus,Cryptoprocta_ferox,Cynictis_penicillata,Cynogale_bennettii,Eupleres_goudotii,Fossa_fossana,Galerella_pulverulenta,Galidia_elegans,Genetta_genetta,Genetta_tigrina,Herpestes_auropunctatus,Herpestes_edwardsii,Herpestes_fuscus,Herpestes_ichneumon,Hyaena_hyaena,Ichneumia_albic…	0
167	20	7.79351	261	29	2.68743	1.00892	1	5.89613	0.00099	0.000727	0.000821	0.001391	0.005364	0.00569	0.005732	0.002203	0.007712	0.005666	0.006395	0.010838	Bdeogale_crassicauda,Crocuta_crocuta,Crossarchus_platycephalus,Cryptoprocta_ferox,Cynictis_penicillata,Eupleres_goudotii,Fossa_fossana,Galerella_pulverulenta,Galidia_elegans,Herpestes_auropunctatus,Herpestes_edwardsii,Herpestes_fuscus,Herpestes_ichneumon,Hyaena_hyaena,Ichneumia_albicauda,Mungos_mungo,Parahyaena_brunnea,Proteles_cristatus,Rhynchogale_melleri,Salanoia_concolor	0
168	16	6.26137	274	30.4444	3.03363	1.13081	1	10.8392	0.00116	0.000749	0.000824	0.002428	0.00431	0.004571	0.004605	0.00177	0.00726	0.004691	0.005159	0.0152	Bdeogale_crassicauda,Crossarchus_platycephalus,Cryptoprocta_ferox,Cynictis_penicillata,Eupleres_goudotii,Fossa_fossana,Galerella_pulverulenta,Galidia_elegans,Herpestes_auropunctatus,Herpestes_edwardsii,Herpestes_fuscus,Herpestes_ichneumon,Ichneumia_albicauda,Mungos_mungo,Rhynchogale_melleri,Salanoia_concolor	0
169	11	6.81178	272	30.2222	2.93944	0.928256	1	9.26353	0.001035	0.00075	0.000822	0.001275	0.004689	0.004973	0.00501	0.001926	0.00705	0.005106	0.005603	0.008686	Bdeogale_crassicauda,Crossarchus_platycephalus,Cynictis_penicillata,Galerella_pulverulenta,Herpestes_auropunctatus,Herpestes_edwardsii,Herpestes_fuscus,Herpestes_ichneumon,Ichneumia_albicauda,Mungos_mungo,Rhynchogale_melleri	0
170	10	3.61639	279	31	2.98471	1.03167	1	10.817	0.001036	0.000756	0.000821	0.00135	0.002489	0.00264	0.00266	0.001022	0.003746	0.002735	0.002967	0.004883	Bdeogale_crassicauda,Crossarchus_platycephalus,Cynictis_penicillata,Herpestes_auropunctatus,Herpestes_edwardsii,Herpestes_fuscus,Herpestes_ichneumon,Ichneumia_albicauda,Mungos_mungo,Rhynchogale_melleri	0
171	2	3.45194	298	33.1111	2.82358	0.957923	1	5.75462	0.001061	0.000743	0.000825	0.001246	0.002376	0.00252	0.002539	0.000976	0.003663	0.002564	0.002848	0.004303	Crossarchus_platycephalus,Mungos_mungo	0
172	1	12.765	299	33.2222	3.03747	0.943153	1	7.9749	0.001077	0.000736	0.000825	0.001198	0.008786	0.009319	0.009389	0.003608	0.013744	0.00939	0.010531	0.015295	Mungos_mungo	0
173	1	12.765	281	31.2222	2.88594	1.04009	1	7.99284	0.000944	0.000743	0.000819	0.000735	0.008786	0.009319	0.009389	0.003608	0.012045	0.009483	0.010455	0.00938	Crossarchus_platycephalus	0
174	8	0.816945	283	31.4444	3.29229	1.10595	1	19.6873	0.001079	0.000746	0.000813	0.002061	0.000562	0.000596	0.000601	0.000231	0.000881	0.000609	0.000664	0.001684	Bdeogale_crassicauda,Cynictis_penicillata,Herpestes_auropunctatus,Herpestes_edwardsii,Herpestes_fuscus,Herpestes_ichneumon,Ichneumia_albicauda,Rhynchogale_melleri	0
175	6	1e-05	299	33.2222	3.0437	0.976783	1	7.66506	0.001113	0.000753	0.000819	0.00178	0	0	0	0	0	0	0	0	Bdeogale_crassicauda,Cynictis_penicillata,Herpestes_auropunctatus,Herpestes_edwardsii,Herpestes_fuscus,Herpestes_ichneumon	0
176	2	2.1	302	33.5556	2.9337	0.971022	1	6.71256	0.001135	0.000772	0.000817	0.002646	0.001445	0.001533	0.001545	0.000594	0.002384	0.00162	0.001717	0.005556	Bdeogale_crassicauda,Cynictis_penicillata	0
177	1	13.3	302	33.5556	2.65384	0.978463	1	5.25951	0.000975	0.00074	0.000812	0.000925	0.009154	0.00971	0.009782	0.00376	0.012963	0.009837	0.010805	0.012302	Cynictis_penicillata	0
178	1	13.3	298	33.1111	2.61106	1.00134	1	4.851	0.000961	0.000742	0.000814	0.000813	0.009154	0.00971	0.009782	0.00376	0.012782	0.009872	0.010826	0.010814	Bdeogale_crassicauda	0
179	4	1e-05	296	32.8889	3.65685	1.00304	1	12.0091	0.001206	0.000734	0.000817	0.002625	0	0	0	0	0	0	0	0	Herpestes_auropunctatus,Herpestes_edwardsii,Herpestes_fuscus,Herpestes_ichneumon	0
180	1	15.4	309	34.3333	2.88505	0.988516	1	6.93785	0.001065	0.000746	0.000822	0.001488	0.0106	0.011243	0.011327	0.004353	0.016399	0.011495	0.012667	0.022919	Herpestes_ichneumon	0
181	3	6.65333	312	34.6667	2.7714	1.01278	1	6.184	0.001019	0.000742	0.000812	0.001249	0.004579	0.004857	0.004894	0.001881	0.006778	0.004938	0.005401	0.008313	Herpestes_auropunctatus,Herpestes_edwardsii,Herpestes_fuscus	0
182	2	4.34667	320	35.5556	2.87033	0.966857	1	6.15882	0.001101	0.000757	0.000819	0.001878	0.002992	0.003173	0.003197	0.001229	0.004785	0.003292	0.003562	0.008164	Herpestes_auropunctatus,Herpestes_edwardsii	0
183	1	4.4	326	36.2222	3.04948	1.03681	1	6.95369	0.001155	0.000741	0.000825	0.001752	0.003029	0.003212	0.003236	0.001244	0.005082	0.003261	0.00363	0.00771	Herpestes_auropunctatus	0
184	1	4.4	328	36.4444	2.84896	1.0177	1	5.7007	0.001098	0.000738	0.000825	0.001306	0.003029	0.003212	0.003236	0.001244	0.004832	0.003249	0.00363	0.005747	Herpestes_edwardsii	0
185	1	8.74667	305	33.8889	2.75351	1.00906	1	5.86496	0.000989	0.000737	0.000812	0.00093	0.00602	0.006386	0.006433	0.002472	0.00865	0.006448	0.007106	0.008137	Herpestes_fuscus	0
186	2	2.0125	301	33.4444	2.90146	1.04155	1	6.08607	0.001092	0.000731	0.000824	0.00154	0.001385	0.001469	0.00148	0.000569	0.002198	0.001472	0.001658	0.003099	Ichneumia_albicauda,Rhynchogale_melleri	0
187	1	13.3875	291	32.3333	2.63982	1.02066	1	6.64547	0.000956	0.000737	0.000816	0.000909	0.009215	0.009774	0.009847	0.003784	0.012797	0.009864	0.010924	0.012175	Ichneumia_albicauda	0
188	1	13.3875	278	30.8889	2.52859	0.949766	1	5.21405	0.000928	0.000735	0.000811	0.000742	0.009215	0.009774	0.009847	0.003784	0.012426	0.009839	0.010864	0.009927	Rhynchogale_melleri	0
189	1	19.8333	267	29.6667	2.61328	0.979866	1	4.93392	0.000956	0.000731	0.000819	0.000814	0.013651	0.014479	0.014587	0.005606	0.018961	0.014506	0.016243	0.016148	Galerella_pulverulenta	0
190	5	3.04512	300	33.3333	4.22638	0.906337	1	21.3881	0.001283	0.00075	0.000831	0.004251	0.002096	0.002223	0.00224	0.000861	0.003906	0.002283	0.002529	0.012944	Cryptoprocta_ferox,Eupleres_goudotii,Fossa_fossana,Galidia_elegans,Salanoia_concolor	0
191	3	1e-05	321	35.6667	4.32317	1.11156	1	19.9637	0.00149	0.000761	0.000836	0.003831	0	0	0	0	0	0	0	0	Cryptoprocta_ferox,Galidia_elegans,Salanoia_concolor	0
192	1	23.6	298	33.1111	3.10246	1.07025	1	8.43142	0.001078	0.000749	0.000827	0.001307	0.016244	0.017229	0.017358	0.006671	0.025433	0.017685	0.019517	0.030837	Cryptoprocta_ferox	0
193	2	11.1233	318	35.3333	3.79116	0.972068	1	13.0746	0.001295	0.000763	0.000831	0.003097	0.007656	0.008121	0.008181	0.003144	0.014406	0.008482	0.009244	0.034448	Galidia_elegans,Salanoia_concolor	0
194	1	12.4767	313	34.7778	3.85398	1.06698	1	14.7593	0.001295	0.000764	0.000832	0.003099	0.008588	0.009109	0.009177	0.003527	0.016159	0.00953	0.010381	0.038671	Galidia_elegans	0
195	1	12.4767	317	35.2222	3.63629	1.02079	1	12.6581	0.001257	0.000763	0.000828	0.002933	0.008588	0.009109	0.009177	0.003527	0.015683	0.00952	0.010324	0.036592	Salanoia_concolor	0
196	2	13.55	443	49.2222	8.82889	0.972341	1	42.4179	0.003007	0.000901	0.000965	0.007119	0.009326	0.009892	0.009966	0.00383	0.04074	0.012207	0.013069	0.096458	Eupleres_goudotii,Fossa_fossana	0
197	1	10.05	469	52.1111	10.0373	1.48225	1.04724	54.9842	0.003245	0.000812	0.000993	0.006876	0.006917	0.007337	0.007392	0.002841	0.032615	0.008163	0.00998	0.069099	Fossa_fossana	0
198	1	10.05	724	80.4444	19.8147	1.79224	8.64868	69.5572	0.007364	0.00144	0.005359	0.007674	0.006917	0.007337	0.007392	0.002841	0.07401	0.014468	0.053858	0.077122	Eupleres_goudotii	0
199	4	23.9765	342	38	4.54528	1.07768	1	14.9261	0.001691	0.000733	0.000858	0.00303	0.016503	0.017504	0.017635	0.006777	0.040549	0.017573	0.020584	0.072658	Crocuta_crocuta,Hyaena_hyaena,Parahyaena_brunnea,Proteles_cristatus	0
200	3	1e-05	367	40.7778	5.5244	1.03625	1	18.4882	0.002058	0.000756	0.000876	0.004858	0	0	0	0	0	0	0	0	Crocuta_crocuta,Hyaena_hyaena,Parahyaena_brunnea	0
201	1	8.93	360	40	4.61795	1.07708	1	15.1241	0.001745	0.000742	0.000871	0.003575	0.006146	0.006519	0.006568	0.002524	0.015586	0.006627	0.007778	0.031925	Crocuta_crocuta	0
202	2	2.5875	376	41.7778	5.19608	1.1059	1	16.2437	0.002033	0.000769	0.000873	0.004007	0.001781	0.001889	0.001903	0.000731	0.005259	0.001991	0.002258	0.010369	Hyaena_hyaena,Parahyaena_brunnea	0
203	1	6.3425	369	41	4.86085	1.03957	1	15.4861	0.001905	0.000775	0.000864	0.004422	0.004366	0.00463	0.004665	0.001793	0.012083	0.004912	0.00548	0.028047	Hyaena_hyaena	0
204	1	6.3425	369	41	4.61231	1.01237	1	14.8915	0.001736	0.000739	0.000864	0.002863	0.004366	0.00463	0.004665	0.001793	0.01101	0.004687	0.00548	0.018162	Parahyaena_brunnea	0
205	1	8.93	879	97.6667	39.4504	12.6484	15.2958	235.648	0.013174	0.007697	0.010616	0.018435	0.006146	0.006519	0.006568	0.002524	0.117644	0.068731	0.094805	0.164626	Proteles_cristatus	1
206	14	0.701622	268	29.7778	3.05276	1.10458	1	11.6573	0.001098	0.00074	0.000821	0.001681	0.000483	0.000512	0.000516	0.000198	0.000771	0.000519	0.000576	0.001179	Arctictis_binturong,Arctogalidia_trivirgata,Civettictis_civetta,Cynogale_bennettii,Genetta_genetta,Genetta_tigrina,Macrogalidia_musschenbroekii,Paguma_larvata,Paradoxurus_hermaphroditus,Prionodon_linsang,Viverra_megaspila,Viverra_tangalunga,Viverra_zibetha,Viverricula_indica	0
207	1	39.9984	253	28.1111	2.54451	1.02476	1	5.52557	0.000899	0.000735	0.000808	0.000569	0.027531	0.029201	0.029419	0.011306	0.035953	0.029418	0.032327	0.022758	Prionodon_linsang	0
208	13	13.1541	259	28.7778	2.42131	0.999985	1	4.01375	0.000892	0.000737	0.000809	0.000535	0.009054	0.009603	0.009675	0.003718	0.01173	0.00969	0.010638	0.007037	Arctictis_binturong,Arctogalidia_trivirgata,Civettictis_civetta,Cynogale_bennettii,Genetta_genetta,Genetta_tigrina,Macrogalidia_musschenbroekii,Paguma_larvata,Paradoxurus_hermaphroditus,Viverra_megaspila,Viverra_tangalunga,Viverra_zibetha,Viverricula_indica	0
209	6	3.93679	284	31.5556	2.86986	1.06492	1	7.09328	0.001011	0.000737	0.000817	0.001142	0.00271	0.002874	0.002896	0.001113	0.00398	0.002901	0.003217	0.004495	Arctictis_binturong,Arctogalidia_trivirgata,Cynogale_bennettii,Macrogalidia_musschenbroekii,Paguma_larvata,Paradoxurus_hermaphroditus	0
210	1	22.9075	264	29.3333	2.36503	0.998437	1	3.79105	0.000877	0.000738	0.000808	0.000406	0.015767	0.016724	0.016848	0.006475	0.020087	0.016914	0.018498	0.009297	Cynogale_bennettii	0
211	5	3.04083	299	33.2222	2.8785	1.00762	1	6.47604	0.001082	0.00074	0.000825	0.001574	0.002093	0.00222	0.002237	0.00086	0.003289	0.002249	0.002509	0.004785	Arctictis_binturong,Arctogalidia_trivirgata,Macrogalidia_musschenbroekii,Paguma_larvata,Paradoxurus_hermaphroditus	0
212	1	19.8667	283	31.4444	2.72166	1.05882	1	6.54782	0.000961	0.000735	0.000819	0.0009	0.013674	0.014504	0.014612	0.005616	0.019101	0.014596	0.016271	0.017883	Arctogalidia_trivirgata	0
213	4	6.23333	305	33.8889	2.78303	1.02462	1	5.30499	0.00113	0.000764	0.000825	0.002433	0.00429	0.004551	0.004585	0.001762	0.007044	0.004762	0.005142	0.015165	Arctictis_binturong,Macrogalidia_musschenbroekii,Paguma_larvata,Paradoxurus_hermaphroditus	0
214	3	3.14083	321	35.6667	3.60025	0.832908	1	13.7958	0.001291	0.000777	0.000837	0.002834	0.002162	0.002293	0.00231	0.000888	0.004053	0.00244	0.002627	0.008901	Macrogalidia_musschenbroekii,Paguma_larvata,Paradoxurus_hermaphroditus	0
215	2	1.6925	356	39.5556	4.01099	1.02269	1	13.9879	0.001387	0.00076	0.00087	0.00211	0.001165	0.001236	0.001245	0.000478	0.002348	0.001286	0.001472	0.003571	Macrogalidia_musschenbroekii,Paradoxurus_hermaphroditus	0
216	1	8.8	383	42.5556	4.90774	1.11605	1	18.0389	0.00168	0.000776	0.000895	0.002579	0.006057	0.006424	0.006472	0.002488	0.014788	0.006827	0.007878	0.022695	Paradoxurus_hermaphroditus	0
217	1	8.8	367	40.7778	5.55978	1.20557	1	25.2217	0.001669	0.000761	0.000884	0.002702	0.006057	0.006424	0.006472	0.002488	0.014687	0.006699	0.007776	0.023778	Macrogalidia_musschenbroekii	0
218	1	10.4925	318	35.3333	3.63332	0.959816	1	15.3072	0.001249	0.000763	0.000837	0.002404	0.007222	0.00766	0.007717	0.002966	0.013101	0.008009	0.008777	0.025224	Paguma_larvata	0
219	1	13.6333	293	32.5556	2.74956	0.991478	1	5.18267	0.001019	0.000741	0.000825	0.00129	0.009384	0.009953	0.010027	0.003854	0.013889	0.010107	0.011247	0.017585	Arctictis_binturong	0
220	7	2.93629	287	31.8889	2.73944	1.04333	1	5.98071	0.001098	0.000741	0.000819	0.002029	0.002021	0.002144	0.00216	0.00083	0.003225	0.002175	0.002406	0.005957	Civettictis_civetta,Genetta_genetta,Genetta_tigrina,Viverra_megaspila,Viverra_tangalunga,Viverra_zibetha,Viverricula_indica	0
221	2	17.908	297	33	2.73639	0.948943	1	5.48015	0.001033	0.000751	0.000824	0.001148	0.012326	0.013074	0.013171	0.005062	0.018498	0.013449	0.014747	0.020567	Genetta_genetta,Genetta_tigrina	0
222	1	6	325	36.1111	3.22094	0.974116	1	6.63737	0.001316	0.00076	0.000834	0.002011	0.00413	0.00438	0.004413	0.001696	0.007899	0.004562	0.005004	0.012064	Genetta_tigrina	0
223	1	6	317	35.2222	3.52756	0.930278	1	9.5128	0.001357	0.000733	0.000834	0.002445	0.00413	0.00438	0.004413	0.001696	0.008144	0.004398	0.005004	0.014669	Genetta_genetta	0
224	5	9.418	288	32	2.55765	0.987056	1	4.07896	0.001023	0.000733	0.000812	0.001249	0.006482	0.006876	0.006927	0.002662	0.009633	0.006901	0.007651	0.011763	Civettictis_civetta,Viverra_megaspila,Viverra_tangalunga,Viverra_zibetha,Viverricula_indica	0
225	4	2.13667	289	32.1111	2.89194	1.03668	1	7.54852	0.001073	0.000753	0.000813	0.001836	0.001471	0.00156	0.001572	0.000604	0.002292	0.001609	0.001737	0.003923	Civettictis_civetta,Viverra_megaspila,Viverra_tangalunga,Viverra_zibetha	0
226	3	7.48667	291	32.3333	3.72694	1.00322	1	21.8646	0.000997	0.000741	0.000813	0.001194	0.005153	0.005466	0.005506	0.002116	0.007465	0.005548	0.006086	0.008943	Viverra_megaspila,Viverra_tangalunga,Viverra_zibetha	0
227	1	4.86667	299	33.2222	2.65713	1.00842	1	5.20931	0.000955	0.000736	0.000813	0.000895	0.00335	0.003553	0.003579	0.001376	0.004649	0.003581	0.003957	0.004355	Viverra_tangalunga	0
228	2	0.98	301	33.4444	3.09015	0.990779	1	9.04964	0.001078	0.000741	0.000822	0.001467	0.000675	0.000715	0.000721	0.000277	0.001057	0.000726	0.000806	0.001438	Viverra_megaspila,Viverra_zibetha	0
229	1	3.88667	298	33.1111	2.74791	0.983478	1	5.2021	0.001012	0.000751	0.000813	0.001251	0.002675	0.002837	0.002859	0.001099	0.003934	0.00292	0.00316	0.004862	Viverra_zibetha	0
230	1	3.88667	295	32.7778	2.74103	1.02744	1	5.42834	0.000969	0.000748	0.000814	0.000905	0.002675	0.002837	0.002859	0.001099	0.003765	0.002907	0.003164	0.003519	Viverra_megaspila	0
231	1	12.3533	287	31.8889	2.65362	0.986223	1	5.27973	0.000979	0.000735	0.000811	0.001072	0.008503	0.009019	0.009086	0.003492	0.012097	0.009081	0.010019	0.013247	Civettictis_civetta	0
232	1	14.49	272	30.2222	2.4933	1.0133	1	4.1299	0.000966	0.000738	0.000809	0.00127	0.009973	0.010578	0.010657	0.004096	0.013998	0.0107	0.011728	0.018406	Viverricula_indica	0
233	49	7.7	327	36.3333	3.13279	0.928346	1	8.52113	0.001121	0.000769	0.000857	0.00152	0.0053	0.005621	0.005663	0.002177	0.008629	0.005922	0.006595	0.011707	Acinonyx_jubatus,Caracal_aurata,Caracal_caracal,Dinofelis_cristata,FAM_62192,Felis_catus,Felis_chaus,Felis_margarita,Felis_nigripes,Felis_silvestris,Homotherium_crusafonti,Homotherium_nestianus,Hyperailurictis_validus,Leopardus_colocolo,Leopardus_geoffroyi,Leopardus_guigna,Leopardus_pardalis,Leopardus_tigrinus,Leopardus_wiedii,Leptailurus_serval,Lynx_canadensis,Lynx_lynx,Lynx_pardinus,Lynx_rufus,…	0
234	1	11.6	318	35.3333	2.74625	0.990784	1	4.71429	0.001037	0.000761	0.000857	0.000913	0.007984	0.008469	0.008532	0.003279	0.012028	0.008823	0.009935	0.010589	Proailurus_lemanensis	0
235	48	8	444	49.3333	3.84132	1.10631	1	13.7795	0.001337	0.0008	0.000984	0.001946	0.005506	0.00584	0.005884	0.002261	0.010694	0.006401	0.007872	0.015568	Acinonyx_jubatus,Caracal_aurata,Caracal_caracal,Dinofelis_cristata,FAM_62192,Felis_catus,Felis_chaus,Felis_margarita,Felis_nigripes,Felis_silvestris,Homotherium_crusafonti,Homotherium_nestianus,Hyperailurictis_validus,Leopardus_colocolo,Leopardus_geoffroyi,Leopardus_guigna,Leopardus_pardalis,Leopardus_tigrinus,Leopardus_wiedii,Leptailurus_serval,Lynx_canadensis,Lynx_lynx,Lynx_pardinus,Lynx_rufus,…	0
236	1	8	450	50	3.90234	0.845381	1	17.8465	0.001401	0.000806	0.001012	0.001755	0.005506	0.00584	0.005884	0.002261	0.011211	0.006444	0.008098	0.01404	Hyperailurictis_validus	0
237	47	10	622	69.1111	4.25002	1.08652	2.31548	6.69951	0.001786	0.000942	0.001427	0.00233	0.006883	0.007301	0.007355	0.002827	0.017859	0.009415	0.014273	0.023298	Acinonyx_jubatus,Caracal_aurata,Caracal_caracal,Dinofelis_cristata,FAM_62192,Felis_catus,Felis_chaus,Felis_margarita,Felis_nigripes,Felis_silvestris,Homotherium_crusafonti,Homotherium_nestianus,Leopardus_colocolo,Leopardus_geoffroyi,Leopardus_guigna,Leopardus_pardalis,Leopardus_tigrinus,Leopardus_wiedii,Leptailurus_serval,Lynx_canadensis,Lynx_lynx,Lynx_pardinus,Lynx_rufus,Megantereon_falconeri,Me…	0
238	7	2	770	85.5556	16.8491	2.32779	3.40082	51.6687	0.006525	0.001671	0.002019	0.010677	0.001377	0.00146	0.001471	0.000565	0.01305	0.003342	0.004038	0.021353	Dinofelis_cristata,Homotherium_crusafonti,Homotherium_nestianus,Megantereon_falconeri,Metailurus_parvulus,Smilodon_fatalis,Xenosmilus_hodsonae	0
239	1	5.984	658	73.1111	5.54809	1.06721	2.45207	14.8569	0.002151	0.000963	0.001581	0.003399	0.004119	0.004369	0.004401	0.001692	0.012872	0.005761	0.009461	0.020339	Metailurus_parvulus	0
240	6	1.917	654	72.6667	4.54769	1.08919	2.41142	10.2769	0.001777	0.000993	0.001536	0.001652	0.001319	0.0014	0.00141	0.000542	0.003407	0.001904	0.002944	0.003167	Dinofelis_cristata,Homotherium_crusafonti,Homotherium_nestianus,Megantereon_falconeri,Smilodon_fatalis,Xenosmilus_hodsonae	0
241	1	7.538	654	72.6667	4.37317	1.06263	2.40685	8.49516	0.001728	0.000991	0.001534	0.001466	0.005188	0.005503	0.005544	0.002131	0.013028	0.007468	0.011566	0.011054	Dinofelis_cristata	0
242	5	1.917	667	74.1111	5.07419	1.08872	2.45207	11.1004	0.00209	0.000975	0.001578	0.003998	0.001319	0.0014	0.00141	0.000542	0.004006	0.001869	0.003026	0.007664	Homotherium_crusafonti,Homotherium_nestianus,Megantereon_falconeri,Smilodon_fatalis,Xenosmilus_hodsonae	0
243	2	1.917	669	74.3333	4.71574	1.05573	2.48521	10.3436	0.001912	0.000996	0.001583	0.001913	0.001319	0.0014	0.00141	0.000542	0.003664	0.001909	0.003034	0.003667	Megantereon_falconeri,Smilodon_fatalis	0
244	1	6.343	672	74.6667	5.43869	1.11393	2.50253	21.7668	0.002555	0.000842	0.001588	0.014617	0.004366	0.004631	0.004665	0.001793	0.016207	0.005339	0.010075	0.092716	Smilodon_fatalis	0
245	1	3.683	668	74.2222	4.69279	1.1615	2.48521	10.4216	0.001896	0.001005	0.001576	0.001974	0.002535	0.002689	0.002709	0.001041	0.006985	0.0037	0.005803	0.007271	Megantereon_falconeri	0
246	3	3.978	672	74.6667	5.12748	1.04352	2.46625	13.4623	0.002101	0.000942	0.001578	0.004429	0.002738	0.002904	0.002926	0.001124	0.00836	0.003746	0.006279	0.017619	Homotherium_crusafonti,Homotherium_nestianus,Xenosmilus_hodsonae	0
247	1	2.294	672	74.6667	4.81914	1.02998	2.45207	11.2644	0.001963	0.000983	0.001574	0.002642	0.001579	0.001675	0.001687	0.000648	0.004504	0.002255	0.003611	0.006061	Homotherium_nestianus	0
248	2	0.144	683	75.8889	6.13686	1.00151	2.53533	24.1198	0.002345	0.00099	0.001645	0.005017	9.9e-05	0.000105	0.000106	4.1e-05	0.000338	0.000143	0.000237	0.000722	Homotherium_crusafonti,Xenosmilus_hodsonae	0
249	1	3.994	691	76.7778	6.15217	1.08573	2.56073	18.538	0.002342	0.001028	0.001667	0.003959	0.002749	0.002916	0.002938	0.001129	0.009353	0.004106	0.006657	0.015812	Xenosmilus_hodsonae	0
250	1	1.694	677	75.2222	5.13243	1.2146	2.50722	11.4668	0.00201	0.001008	0.001623	0.002136	0.001166	0.001237	0.001246	0.000479	0.003404	0.001707	0.002749	0.003618	Homotherium_crusafonti	0
251	40	2.74	662	73.5556	6.23444	1.40498	2.50191	20.6063	0.00246	0.000965	0.001611	0.00482	0.001886	0.002	0.002015	0.000775	0.006741	0.002643	0.004415	0.013206	Acinonyx_jubatus,Caracal_aurata,Caracal_caracal,FAM_62192,Felis_catus,Felis_chaus,Felis_margarita,Felis_nigripes,Felis_silvestris,Leopardus_colocolo,Leopardus_geoffroyi,Leopardus_guigna,Leopardus_pardalis,Leopardus_tigrinus,Leopardus_wiedii,Leptailurus_serval,Lynx_canadensis,Lynx_lynx,Lynx_pardinus,Lynx_rufus,Miracinonyx_studeri,Neofelis_nebulosa,Otocolobus_manul,Panthera_atrox,Panthera_augusta,P…	0
252	1	6.31	644	71.5556	4.348	1.09629	2.36908	9.38769	0.00168	0.000985	0.001519	0.001638	0.004343	0.004607	0.004641	0.001784	0.010603	0.006215	0.009582	0.010334	FAM_62192	0
253	39	0.74	707	78.5556	4.84951	2.38711	2.51743	9.8229	0.001998	0.001062	0.001659	0.00289	0.000509	0.00054	0.000544	0.000209	0.001479	0.000786	0.001228	0.002139	Acinonyx_jubatus,Caracal_aurata,Caracal_caracal,Felis_catus,Felis_chaus,Felis_margarita,Felis_nigripes,Felis_silvestris,Leopardus_colocolo,Leopardus_geoffroyi,Leopardus_guigna,Leopardus_pardalis,Leopardus_tigrinus,Leopardus_wiedii,Leptailurus_serval,Lynx_canadensis,Lynx_lynx,Lynx_pardinus,Lynx_rufus,Miracinonyx_studeri,Neofelis_nebulosa,Otocolobus_manul,Panthera_atrox,Panthera_augusta,Panthera_le…	0
254	9	0.74	766	85.1111	9.25928	2.45881	2.83135	33.8969	0.003504	0.001758	0.001826	0.008085	0.000509	0.00054	0.000544	0.000209	0.002593	0.001301	0.001352	0.005983	Neofelis_nebulosa,Panthera_atrox,Panthera_augusta,Panthera_leo,Panthera_onca,Panthera_pardus,Panthera_spelaea,Panthera_tigris,Panthera_uncia	0
255	1	10.78	759	84.3333	6.27923	2.74358	2.74455	22.4812	0.002279	0.001819	0.001787	0.003353	0.00742	0.00787	0.007929	0.003047	0.02457	0.019606	0.019262	0.036143	Neofelis_nebulosa	0
256	8	1.2075	806	89.5556	7.97492	2.66707	3.15827	21.1991	0.003136	0.001882	0.001993	0.00539	0.000831	0.000882	0.000888	0.000341	0.003786	0.002273	0.002406	0.006508	Panthera_atrox,Panthera_augusta,Panthera_leo,Panthera_onca,Panthera_pardus,Panthera_spelaea,Panthera_tigris,Panthera_uncia	0
257	2	1.2075	821	91.2222	8.99797	2.50223	3.24914	20.8217	0.003689	0.001802	0.002055	0.005709	0.000831	0.000882	0.000888	0.000341	0.004454	0.002176	0.002482	0.006893	Panthera_tigris,Panthera_uncia	0
258	1	8.365	841	93.4444	10.3565	2.82861	3.43148	33.9971	0.004086	0.001822	0.002155	0.006782	0.005758	0.006107	0.006152	0.002365	0.034183	0.015239	0.018025	0.056727	Panthera_tigris	0
259	1	8.365	816	90.6667	7.51349	2.61228	3.19296	16.3758	0.003084	0.001814	0.002016	0.004271	0.005758	0.006107	0.006152	0.002365	0.025802	0.015175	0.016865	0.035729	Panthera_uncia	0
260	6	1.99083	826	91.7778	9.20924	2.44833	3.32607	28.8978	0.00354	0.001816	0.002092	0.006022	0.00137	0.001453	0.001464	0.000563	0.007047	0.003616	0.004165	0.011989	Panthera_atrox,Panthera_augusta,Panthera_leo,Panthera_onca,Panthera_pardus,Panthera_spelaea	0
261	2	4.48767	858	95.3333	15.8194	3.40791	4.2017	58.6797	0.005849	0.001886	0.002476	0.011009	0.003089	0.003276	0.003301	0.001269	0.026247	0.008464	0.011109	0.049404	Panthera_augusta,Panthera_onca	1
262	1	2.039	859	95.4444	15.3495	3.19882	4.00037	47.1444	0.006189	0.002179	0.002404	0.020608	0.001403	0.001489	0.0015	0.000576	0.01262	0.004444	0.004902	0.04202	Panthera_augusta	1
263	1	3.094	895	99.4444	27.2242	3.8752	8.77753	73.4471	0.010319	0.002594	0.00539	0.014203	0.00213	0.002259	0.002276	0.000875	0.031927	0.008026	0.016678	0.043943	Panthera_onca	1
264	4	1.99083	829	92.1111	8.49417	2.71363	3.36747	18.8595	0.003454	0.001836	0.002108	0.004393	0.00137	0.001453	0.001464	0.000563	0.006876	0.003655	0.004197	0.008745	Panthera_atrox,Panthera_leo,Panthera_pardus,Panthera_spelaea	0
265	1	5.59083	829	92.1111	8.07143	2.55637	3.30403	19.1548	0.003138	0.001825	0.002092	0.003852	0.003848	0.004082	0.004112	0.00158	0.017545	0.010206	0.011697	0.021535	Panthera_pardus	0
266	3	2.32817	837	93	10.223	2.85927	3.51446	33.7164	0.004	0.001813	0.002214	0.006477	0.001602	0.0017	0.001712	0.000658	0.009312	0.004221	0.005155	0.015079	Panthera_atrox,Panthera_leo,Panthera_spelaea	0
267	1	3.26267	831	92.3333	8.58699	2.8403	3.34825	31.8786	0.003179	0.001879	0.002102	0.003863	0.002246	0.002382	0.0024	0.000922	0.010373	0.006132	0.00686	0.012605	Panthera_leo	0
268	2	0.337333	840	93.3333	10.8771	2.88388	3.46902	35.847	0.004211	0.001876	0.002192	0.007815	0.000232	0.000246	0.000248	9.5e-05	0.001421	0.000633	0.000739	0.002636	Panthera_atrox,Panthera_spelaea	0
269	1	1.62533	837	93	9.80037	2.29873	3.39418	34.6673	0.003629	0.001851	0.002142	0.005939	0.001119	0.001187	0.001195	0.000459	0.005898	0.003009	0.003481	0.009652	Panthera_spelaea	0
270	1	1.62933	840	93.3333	13.797	1.79896	3.48775	133.934	0.004191	0.001934	0.002177	0.013297	0.001121	0.001189	0.001198	0.000461	0.006828	0.003151	0.003548	0.021665	Panthera_atrox	0
271	30	1.415	720	80	5.99186	2.74576	2.53232	31.4986	0.002151	0.001108	0.001656	0.003936	0.000974	0.001033	0.001041	0.0004	0.003043	0.001568	0.002343	0.00557	Acinonyx_jubatus,Caracal_aurata,Caracal_caracal,Felis_catus,Felis_chaus,Felis_margarita,Felis_nigripes,Felis_silvestris,Leopardus_colocolo,Leopardus_geoffroyi,Leopardus_guigna,Leopardus_pardalis,Leopardus_tigrinus,Leopardus_wiedii,Leptailurus_serval,Lynx_canadensis,Lynx_lynx,Lynx_pardinus,Lynx_rufus,Miracinonyx_studeri,Otocolobus_manul,Pardofelis_badia,Pardofelis_marmorata,Pardofelis_temminckii,P…	0
272	3	0.675	720	80	4.87504	2.42855	2.53308	7.99303	0.002119	0.001805	0.00166	0.003407	0.000465	0.000493	0.000496	0.000191	0.00143	0.001218	0.00112	0.0023	Pardofelis_badia,Pardofelis_marmorata,Pardofelis_temminckii	0
273	1	9.43	723	80.3333	4.34375	2.44223	2.50338	6.64264	0.001802	0.001797	0.001651	0.00187	0.006491	0.006884	0.006936	0.002666	0.016993	0.016948	0.015571	0.017637	Pardofelis_marmorata	0
274	2	4.7125	731	81.2222	4.84626	2.43079	2.56905	9.0818	0.001991	0.001769	0.001674	0.002277	0.003244	0.00344	0.003466	0.001332	0.009383	0.008335	0.007891	0.010731	Pardofelis_badia,Pardofelis_temminckii	0
275	1	4.7175	725	80.5556	5.02903	2.26806	2.52341	16.7947	0.001908	0.001763	0.001649	0.002612	0.003247	0.003444	0.00347	0.001334	0.009	0.008316	0.00778	0.012322	Pardofelis_temminckii	0
276	1	4.7175	728	80.8889	4.3614	2.43828	2.53021	6.49935	0.001794	0.001781	0.001656	0.001519	0.003247	0.003444	0.00347	0.001334	0.008462	0.0084	0.00781	0.007166	Pardofelis_badia	0
277	27	1.135	730	81.1111	4.24	2.42996	2.51743	6.12318	0.001731	0.001788	0.001659	0.001223	0.000781	0.000829	0.000835	0.000321	0.001965	0.00203	0.001883	0.001388	Acinonyx_jubatus,Caracal_aurata,Caracal_caracal,Felis_catus,Felis_chaus,Felis_margarita,Felis_nigripes,Felis_silvestris,Leopardus_colocolo,Leopardus_geoffroyi,Leopardus_guigna,Leopardus_pardalis,Leopardus_tigrinus,Leopardus_wiedii,Leptailurus_serval,Lynx_canadensis,Lynx_lynx,Lynx_pardinus,Lynx_rufus,Miracinonyx_studeri,Otocolobus_manul,Prionailurus_bengalensis,Prionailurus_planiceps,Prionailurus_…	0
278	3	0.46	738	82	5.5744	2.4144	2.57292	14.6672	0.002388	0.001778	0.001687	0.004586	0.000317	0.000336	0.000338	0.00013	0.001098	0.000818	0.000776	0.00211	Caracal_aurata,Caracal_caracal,Leptailurus_serval	0
279	1	8.51	734	81.5556	4.58329	2.44346	2.51722	8.27389	0.00186	0.001765	0.001657	0.001843	0.005857	0.006213	0.006259	0.002406	0.015828	0.015016	0.014097	0.015683	Leptailurus_serval	0
280	2	2.355	740	82.2222	5.12283	2.34516	2.53198	11.9428	0.002016	0.001784	0.001672	0.002669	0.001621	0.001719	0.001732	0.000666	0.004748	0.004201	0.003938	0.006285	Caracal_aurata,Caracal_caracal	0
281	1	6.155	735	81.6667	4.72824	2.37111	2.51722	9.33023	0.001843	0.00179	0.00166	0.00164	0.004236	0.004493	0.004527	0.00174	0.011344	0.011019	0.010216	0.010095	Caracal_aurata	0
282	1	6.155	744	82.6667	4.79214	2.44739	2.54739	8.95777	0.002015	0.001818	0.001676	0.003021	0.004236	0.004493	0.004527	0.00174	0.012404	0.01119	0.010313	0.018594	Caracal_caracal	0
283	24	0.69	754	83.7778	5.11607	2.34606	2.56905	11.9414	0.00207	0.001777	0.001684	0.003392	0.000475	0.000504	0.000507	0.000195	0.001429	0.001226	0.001162	0.00234	Acinonyx_jubatus,Felis_catus,Felis_chaus,Felis_margarita,Felis_nigripes,Felis_silvestris,Leopardus_colocolo,Leopardus_geoffroyi,Leopardus_guigna,Leopardus_pardalis,Leopardus_tigrinus,Leopardus_wiedii,Lynx_canadensis,Lynx_lynx,Lynx_pardinus,Lynx_rufus,Miracinonyx_studeri,Otocolobus_manul,Prionailurus_bengalensis,Prionailurus_planiceps,Prionailurus_rubiginosus,Prionailurus_viverrinus,Puma_concolor,…	0
284	6	0.23	777	86.3333	5.7172	2.51686	2.62392	13.2188	0.002385	0.001777	0.00175	0.00513	0.000158	0.000168	0.000169	6.5e-05	0.000549	0.000409	0.000402	0.00118	Leopardus_colocolo,Leopardus_geoffroyi,Leopardus_guigna,Leopardus_pardalis,Leopardus_tigrinus,Leopardus_wiedii	0
285	2	3.962	789	87.6667	5.78777	2.42146	2.72336	12.211	0.002414	0.001805	0.001781	0.003605	0.002727	0.002892	0.002914	0.00112	0.009565	0.007153	0.007056	0.014284	Leopardus_pardalis,Leopardus_wiedii	0
286	1	4.088	799	88.7778	8.15501	2.60949	2.81939	21.1548	0.003156	0.001767	0.001849	0.005111	0.002814	0.002984	0.003007	0.001156	0.012901	0.007225	0.007557	0.020893	Leopardus_pardalis	0
287	1	4.088	796	88.4444	6.36794	2.36886	2.74646	14.5974	0.002586	0.001771	0.001788	0.003861	0.002814	0.002984	0.003007	0.001156	0.010571	0.00724	0.00731	0.015785	Leopardus_wiedii	0
288	4	2.25833	781	86.7778	5.73778	2.50584	2.67263	15.3329	0.00218	0.001793	0.001762	0.00256	0.001554	0.001649	0.001661	0.000638	0.004922	0.004049	0.003979	0.005782	Leopardus_colocolo,Leopardus_geoffroyi,Leopardus_guigna,Leopardus_tigrinus	0
289	1	5.79167	786	87.3333	5.9567	2.51883	2.72336	13.6994	0.002336	0.001824	0.001783	0.003205	0.003986	0.004228	0.00426	0.001637	0.01353	0.010566	0.010324	0.018561	Leopardus_colocolo	0
290	3	4.94	794	88.2222	6.50394	2.38246	2.75239	23.214	0.002557	0.001781	0.001791	0.004423	0.0034	0.003606	0.003633	0.001396	0.012629	0.008798	0.008849	0.02185	Leopardus_geoffroyi,Leopardus_guigna,Leopardus_tigrinus	0
291	1	0.851667	820	91.1111	9.09358	2.77523	2.99775	37.073	0.003921	0.001558	0.001914	0.016387	0.000586	0.000622	0.000626	0.000241	0.003339	0.001327	0.00163	0.013956	Leopardus_tigrinus	0
292	2	0.423333	809	89.8889	7.79208	2.36435	2.91794	22.0465	0.003102	0.001769	0.001881	0.004597	0.000291	0.000309	0.000311	0.00012	0.001313	0.000749	0.000796	0.001946	Leopardus_geoffroyi,Leopardus_guigna	0
293	1	0.428333	805	89.4444	6.14116	2.5359	2.78555	13.3455	0.002507	0.001784	0.00182	0.003388	0.000295	0.000313	0.000315	0.000121	0.001074	0.000764	0.00078	0.001451	Leopardus_geoffroyi	0
294	1	0.428333	806	89.5556	6.9978	2.39239	2.85466	16.299	0.002895	0.001828	0.001852	0.005111	0.000295	0.000313	0.000315	0.000121	0.00124	0.000783	0.000793	0.002189	Leopardus_guigna	0
295	18	0.68	766	85.1111	5.639	2.46805	2.57675	14.1859	0.002257	0.001814	0.001704	0.003965	0.000468	0.000496	0.0005	0.000192	0.001535	0.001234	0.001159	0.002696	Acinonyx_jubatus,Felis_catus,Felis_chaus,Felis_margarita,Felis_nigripes,Felis_silvestris,Lynx_canadensis,Lynx_lynx,Lynx_pardinus,Lynx_rufus,Miracinonyx_studeri,Otocolobus_manul,Prionailurus_bengalensis,Prionailurus_planiceps,Prionailurus_rubiginosus,Prionailurus_viverrinus,Puma_concolor,Puma_yagouaroundi	0
296	4	0.45	764	84.8889	4.83975	2.37443	2.575	8.78297	0.002012	0.001767	0.00169	0.002685	0.00031	0.000329	0.000331	0.000127	0.000905	0.000795	0.00076	0.001208	Lynx_canadensis,Lynx_lynx,Lynx_pardinus,Lynx_rufus	0
297	1	7.15	762	84.6667	4.75722	2.40507	2.576	7.56037	0.002024	0.001773	0.001689	0.00254	0.004921	0.00522	0.005259	0.002021	0.014471	0.012676	0.012074	0.018163	Lynx_rufus	0
298	3	1.31667	773	85.8889	5.76114	2.51586	2.59361	16.9383	0.002144	0.001763	0.001731	0.003441	0.000906	0.000961	0.000968	0.000372	0.002823	0.002322	0.002279	0.004531	Lynx_canadensis,Lynx_lynx,Lynx_pardinus	0
299	1	5.83333	764	84.8889	5.28153	2.41419	2.56557	11.7348	0.001953	0.001779	0.00169	0.00193	0.004015	0.004259	0.00429	0.001649	0.011391	0.010379	0.009857	0.011259	Lynx_canadensis	0
300	2	1.31667	771	85.6667	5.48586	2.30343	2.58543	14.5296	0.002117	0.001791	0.001707	0.002999	0.000906	0.000961	0.000968	0.000372	0.002787	0.002359	0.002248	0.003949	Lynx_lynx,Lynx_pardinus	0
301	1	4.51667	770	85.5556	5.76848	2.34634	2.57292	14.5263	0.00223	0.001729	0.001704	0.00469	0.003109	0.003297	0.003322	0.001277	0.010072	0.007811	0.007697	0.021182	Lynx_pardinus	0
302	1	4.51667	774	86	5.31245	2.49769	2.59361	10.4692	0.002109	0.001765	0.001731	0.002663	0.003109	0.003297	0.003322	0.001277	0.009526	0.007971	0.007817	0.012026	Lynx_lynx	0
303	14	0.675	768	85.3333	5.367	2.49641	2.5492	19.5006	0.002007	0.001802	0.001683	0.003014	0.000465	0.000493	0.000496	0.000191	0.001355	0.001216	0.001136	0.002034	Acinonyx_jubatus,Felis_catus,Felis_chaus,Felis_margarita,Felis_nigripes,Felis_silvestris,Miracinonyx_studeri,Otocolobus_manul,Prionailurus_bengalensis,Prionailurus_planiceps,Prionailurus_rubiginosus,Prionailurus_viverrinus,Puma_concolor,Puma_yagouaroundi	0
304	4	0.225	771	85.6667	8.31812	2.39353	2.61673	40.8235	0.002922	0.001764	0.001743	0.006296	0.000155	0.000164	0.000165	6.4e-05	0.000657	0.000397	0.000392	0.001417	Acinonyx_jubatus,Miracinonyx_studeri,Puma_concolor,Puma_yagouaroundi	0
305	1	6.7	772	85.7778	7.5096	1.71902	2.57985	74.3942	0.002163	0.001748	0.001705	0.00352	0.004612	0.004891	0.004928	0.001894	0.014494	0.011711	0.011422	0.023582	Acinonyx_jubatus	0
306	3	0.6	778	86.4444	5.153	2.37344	2.59123	8.88003	0.002195	0.001788	0.001724	0.003215	0.000413	0.000438	0.000441	0.00017	0.001317	0.001073	0.001035	0.001929	Miracinonyx_studeri,Puma_concolor,Puma_yagouaroundi	0
307	1	6.1	783	87	5.83233	2.25816	2.66854	14.5938	0.002456	0.001778	0.00175	0.004493	0.004199	0.004453	0.004487	0.001724	0.014981	0.010843	0.010677	0.027406	Puma_yagouaroundi	0
308	2	0.6	777	86.3333	5.27936	2.38077	2.60999	10.1483	0.002204	0.001769	0.001728	0.00296	0.000413	0.000438	0.000441	0.00017	0.001322	0.001061	0.001037	0.001776	Miracinonyx_studeri,Puma_concolor	0
309	1	3.044	774	86	4.64107	2.41437	2.56241	7.70413	0.00186	0.001782	0.001699	0.001519	0.002095	0.002222	0.002239	0.00086	0.005662	0.005425	0.005173	0.004623	Miracinonyx_studeri	0
310	1	5.5	774	86	4.91357	2.35645	2.575	9.25398	0.001991	0.001795	0.001704	0.002481	0.003786	0.004015	0.004045	0.001555	0.010948	0.009874	0.009372	0.013645	Puma_concolor	0
311	10	0.485	765	85	6.3145	2.51815	2.56241	30.0915	0.002207	0.001815	0.001703	0.003943	0.000334	0.000354	0.000357	0.000137	0.001071	0.00088	0.000826	0.001912	Felis_catus,Felis_chaus,Felis_margarita,Felis_nigripes,Felis_silvestris,Otocolobus_manul,Prionailurus_bengalensis,Prionailurus_planiceps,Prionailurus_rubiginosus,Prionailurus_viverrinus	0
312	5	0.26	768	85.3333	5.43156	2.42168	2.57675	11.0675	0.00227	0.001742	0.001701	0.003755	0.000179	0.00019	0.000191	7.3e-05	0.00059	0.000453	0.000442	0.000976	Felis_catus,Felis_chaus,Felis_margarita,Felis_nigripes,Felis_silvestris	0
313	1	6.18	772	85.7778	4.59518	2.36104	2.57031	7.13619	0.001917	0.001754	0.001687	0.00182	0.004254	0.004512	0.004545	0.001747	0.011848	0.01084	0.010426	0.011248	Felis_chaus	0
314	4	0.645	773	85.8889	6.30706	2.62972	2.57779	26.2577	0.002502	0.001657	0.001703	0.012173	0.000444	0.000471	0.000474	0.000182	0.001614	0.001069	0.001098	0.007851	Felis_catus,Felis_margarita,Felis_nigripes,Felis_silvestris	0
315	1	5.535	772	85.7778	4.51834	2.38866	2.56535	6.95342	0.001847	0.001776	0.001685	0.001412	0.00381	0.004041	0.004071	0.001565	0.010225	0.00983	0.009329	0.007814	Felis_nigripes	0
316	3	0.645	777	86.3333	5.81369	2.35738	2.59829	17.4105	0.002324	0.001744	0.001722	0.004021	0.000444	0.000471	0.000474	0.000182	0.001499	0.001125	0.001111	0.002594	Felis_catus,Felis_margarita,Felis_silvestris	0
317	1	4.89	789	87.6667	6.83207	2.33642	2.66351	32.699	0.002354	0.001759	0.001752	0.003279	0.003366	0.00357	0.003597	0.001382	0.011513	0.008602	0.008569	0.016034	Felis_margarita	0
318	2	0.645	786	87.3333	6.13652	2.53881	2.65114	19.1261	0.002415	0.001753	0.00174	0.003549	0.000444	0.000471	0.000474	0.000182	0.001558	0.00113	0.001123	0.002289	Felis_catus,Felis_silvestris	0
319	1	4.245	781	86.7778	6.13894	2.58996	2.62897	24.9285	0.002235	0.001791	0.001734	0.003415	0.002922	0.003099	0.003122	0.0012	0.009488	0.007604	0.00736	0.014498	Felis_catus	0
320	1	4.245	779	86.5556	5.10619	2.43736	2.57779	10.6242	0.00204	0.001756	0.001707	0.002377	0.002922	0.003099	0.003122	0.0012	0.008658	0.007454	0.007248	0.01009	Felis_silvestris	0
321	5	0.26	769	85.4444	6.37544	2.30952	2.55355	28.2016	0.002372	0.001759	0.001683	0.00498	0.000179	0.00019	0.000191	7.3e-05	0.000617	0.000457	0.000438	0.001295	Otocolobus_manul,Prionailurus_bengalensis,Prionailurus_planiceps,Prionailurus_rubiginosus,Prionailurus_viverrinus	0
322	1	6.18	768	85.3333	4.324	2.44771	2.51743	6.77975	0.001744	0.001791	0.00167	0.001359	0.004254	0.004512	0.004545	0.001747	0.010776	0.011065	0.010324	0.008396	Otocolobus_manul	0
323	4	0.898	766	85.1111	5.34018	2.41655	2.5492	14.3327	0.002003	0.001791	0.001678	0.002777	0.000618	0.000656	0.00066	0.000254	0.001799	0.001608	0.001507	0.002494	Prionailurus_bengalensis,Prionailurus_planiceps,Prionailurus_rubiginosus,Prionailurus_viverrinus	0
324	1	5.282	765	85	4.99127	2.3349	2.53644	10.931	0.0019	0.001795	0.001676	0.001883	0.003636	0.003856	0.003885	0.001493	0.010036	0.009482	0.00885	0.009947	Prionailurus_rubiginosus	0
325	3	0.898	773	85.8889	5.21931	2.47957	2.56241	12.4502	0.002049	0.00174	0.001678	0.003268	0.000618	0.000656	0.00066	0.000254	0.00184	0.001562	0.001507	0.002935	Prionailurus_bengalensis,Prionailurus_planiceps,Prionailurus_viverrinus	0
326	1	4.384	771	85.6667	4.71273	2.39557	2.55355	7.41082	0.001999	0.001798	0.001683	0.002642	0.003017	0.003201	0.003224	0.001239	0.008765	0.007882	0.007378	0.011583	Prionailurus_planiceps	0
327	2	0.898	774	86	5.02591	2.44493	2.56241	9.80388	0.002033	0.001767	0.001685	0.002692	0.000618	0.000656	0.00066	0.000254	0.001826	0.001587	0.001514	0.002417	Prionailurus_bengalensis,Prionailurus_viverrinus	0
328	1	3.486	774	86	5.42832	2.5391	2.56557	14.9062	0.0021	0.001766	0.001684	0.003582	0.002399	0.002545	0.002564	0.000985	0.007322	0.006155	0.005872	0.012485	Prionailurus_bengalensis	0
329	1	3.486	773	85.8889	5.46882	2.52097	2.54619	22.1367	0.001934	0.001765	0.001678	0.002078	0.002399	0.002545	0.002564	0.000985	0.006742	0.006152	0.005851	0.007242	Prionailurus_viverrinus	0
330	2	38.3684	463	51.4444	11.1079	1.04241	1.25552	34.4145	0.00419	0.000915	0.001067	0.006679	0.026409	0.028011	0.02822	0.010846	0.160782	0.035103	0.040932	0.256275	Sus_scrofa,Tayassu_pecari	0
331	1	40.0242	473	52.5556	11.6876	1.0594	1.98339	34.6613	0.004629	0.000884	0.001091	0.00851	0.027548	0.02922	0.029438	0.011314	0.185292	0.035385	0.043674	0.34062	Tayassu_pecari	0
332	1	40.0242	871	96.7778	31.2094	10.5938	14.6147	65.8841	0.011968	0.007625	0.009615	0.008776	0.027548	0.02922	0.029438	0.011314	0.479001	0.305164	0.384815	0.351233	Sus_scrofa	1
333	66	19.2528	538	59.7778	11.7144	1.3415	2.4159	35.576	0.004745	0.000991	0.001256	0.008	0.013252	0.014056	0.01416	0.005442	0.091357	0.019073	0.024187	0.154013	Artibeus_jamaicensis,Artibeus_lituratus,Carollia_castanea,Carollia_perspicillata,Centurio_senex,Chiroderma_villosum,Cynopterus_brachyotis,Desmodus_rotundus,Eidolon_helvum,Emballonura_monticola,Eptesicus_furinalis,Erophylla_sezekorni,Glossophaga_soricina,Hipposideros_bicolor,Hipposideros_cervinus,Hipposideros_diadema,Hipposideros_galeritus,Hipposideros_larvatus,Hipposideros_lylei,Hipposideros_ridl…	0
334	19	4.08788	373	41.4444	3.45038	0.977042	1	6.59676	0.001351	0.000774	0.000938	0.002348	0.002814	0.002984	0.003007	0.001156	0.005521	0.003163	0.003834	0.009598	Cynopterus_brachyotis,Eidolon_helvum,Hipposideros_bicolor,Hipposideros_cervinus,Hipposideros_diadema,Hipposideros_galeritus,Hipposideros_larvatus,Hipposideros_lylei,Hipposideros_ridleyi,Pteropus_poliocephalus,Pteropus_vampyrus,Rhinolophus_affinis,Rhinolophus_lepidus,Rhinolophus_luctus,Rhinolophus_robinsoni,Rhinolophus_sedulus,Rhinolophus_stheno,Rhinolophus_trifoliatus,Rousettus_aegyptiacus	0
335	14	16.8941	383	42.5556	4.00196	0.941076	1	10.3057	0.001393	0.0008	0.000938	0.002069	0.011628	0.012334	0.012426	0.004775	0.023532	0.013513	0.015855	0.034948	Hipposideros_bicolor,Hipposideros_cervinus,Hipposideros_diadema,Hipposideros_galeritus,Hipposideros_larvatus,Hipposideros_lylei,Hipposideros_ridleyi,Rhinolophus_affinis,Rhinolophus_lepidus,Rhinolophus_luctus,Rhinolophus_robinsoni,Rhinolophus_sedulus,Rhinolophus_stheno,Rhinolophus_trifoliatus	0
336	7	11.341	385	42.7778	3.53272	1.09159	1	10.9899	0.001217	0.000793	0.000931	0.001424	0.007806	0.00828	0.008341	0.003206	0.013803	0.008998	0.010558	0.016154	Rhinolophus_affinis,Rhinolophus_lepidus,Rhinolophus_luctus,Rhinolophus_robinsoni,Rhinolophus_sedulus,Rhinolophus_stheno,Rhinolophus_trifoliatus	0
337	6	1e-05	393	43.6667	4.34893	0.838655	1	20.3584	0.00145	0.000784	0.000932	0.002785	0	0	0	0	0	0	0	0	Rhinolophus_affinis,Rhinolophus_lepidus,Rhinolophus_robinsoni,Rhinolophus_sedulus,Rhinolophus_stheno,Rhinolophus_trifoliatus	0
338	5	4.62626	402	44.6667	4.76532	0.919875	1	17.8029	0.001541	0.00078	0.000932	0.003268	0.003184	0.003377	0.003403	0.001308	0.007128	0.003606	0.004312	0.01512	Rhinolophus_affinis,Rhinolophus_lepidus,Rhinolophus_robinsoni,Rhinolophus_sedulus,Rhinolophus_stheno	0
339	3	4.06963	416	46.2222	3.9427	1.10133	1	11.2939	0.001349	0.000792	0.000932	0.001704	0.002801	0.002971	0.002993	0.00115	0.005491	0.003222	0.003793	0.006936	Rhinolophus_lepidus,Rhinolophus_robinsoni,Rhinolophus_sedulus	0
340	2	3.60411	426	47.3333	4.55834	1.00575	1	14.4691	0.001547	0.00079	0.000942	0.002858	0.002481	0.002631	0.002651	0.001019	0.005577	0.002847	0.003397	0.010302	Rhinolophus_robinsoni,Rhinolophus_sedulus	0
341	1	18	416	46.2222	3.61884	1.00817	1	8.51154	0.001326	0.000809	0.000933	0.001824	0.012389	0.013141	0.013239	0.005088	0.023875	0.014565	0.016794	0.032836	Rhinolophus_robinsoni	0
342	1	18	418	46.4444	3.5773	1.00245	1	8.66291	0.001268	0.000801	0.000937	0.001399	0.012389	0.013141	0.013239	0.005088	0.022816	0.01442	0.016866	0.025183	Rhinolophus_sedulus	0
343	1	21.6041	410	45.5556	3.51592	0.941395	1	7.54726	0.00131	0.000795	0.000932	0.001861	0.01487	0.015772	0.01589	0.006107	0.028312	0.01718	0.020131	0.040197	Rhinolophus_lepidus	0
344	2	16.1237	404	44.8889	3.15777	0.985558	1	5.29428	0.001207	0.000795	0.000924	0.001327	0.011098	0.011771	0.011859	0.004558	0.019457	0.012824	0.01489	0.021393	Rhinolophus_affinis,Rhinolophus_stheno	0
345	1	9.55	392	43.5556	3.1308	0.986611	1	5.49663	0.001196	0.000804	0.000919	0.001858	0.006573	0.006972	0.007024	0.0027	0.011421	0.007682	0.008776	0.017748	Rhinolophus_stheno	0
346	1	9.55	404	44.8889	3.29517	1.0199	1	5.58087	0.001315	0.000787	0.000927	0.002085	0.006573	0.006972	0.007024	0.0027	0.012563	0.007519	0.008848	0.019915	Rhinolophus_affinis	0
347	1	30.3	383	42.5556	3.44287	0.924929	1	11.5988	0.001164	0.000798	0.000929	0.000975	0.020855	0.022121	0.022286	0.008565	0.035275	0.024166	0.028134	0.029555	Rhinolophus_trifoliatus	0
348	1	30.3	396	44	3.49892	1.03297	1	6.09178	0.001346	0.000794	0.000952	0.00164	0.020855	0.022121	0.022286	0.008565	0.040791	0.024046	0.028858	0.049682	Rhinolophus_luctus	0
349	7	9.441	385	42.7778	3.34776	1.02069	1	6.13178	0.001238	0.000805	0.000935	0.001485	0.006498	0.006892	0.006944	0.002669	0.011687	0.007602	0.008827	0.01402	Hipposideros_bicolor,Hipposideros_cervinus,Hipposideros_diadema,Hipposideros_galeritus,Hipposideros_larvatus,Hipposideros_lylei,Hipposideros_ridleyi	0
350	3	0.2	414	46	5.13417	1.04468	1	17.4099	0.001777	0.000792	0.000967	0.003284	0.000138	0.000146	0.000147	5.7e-05	0.000355	0.000158	0.000193	0.000657	Hipposideros_cervinus,Hipposideros_galeritus,Hipposideros_ridleyi	0
351	2	1e-05	450	50	4.99335	1.02277	1	11.6501	0.002036	0.000821	0.001026	0.004218	0	0	0	0	0	0	0	0	Hipposideros_cervinus,Hipposideros_galeritus	0
352	1	32	482	53.5556	5.73175	1.08221	1.64601	14.9288	0.002238	0.000841	0.001091	0.004148	0.022025	0.023362	0.023536	0.009046	0.07161	0.026917	0.034927	0.132748	Hipposideros_galeritus	0
353	1	32	441	49	4.38963	1.02753	1	10.512	0.00162	0.000806	0.000993	0.002227	0.022025	0.023362	0.023536	0.009046	0.051827	0.025779	0.031776	0.07128	Hipposideros_cervinus	0
354	1	32	399	44.3333	3.68735	1.0141	1	9.04733	0.001293	0.000794	0.00095	0.00137	0.022025	0.023362	0.023536	0.009046	0.041361	0.02541	0.030413	0.04383	Hipposideros_ridleyi	0
355	4	1e-05	400	44.4444	4.40661	0.987102	1	12.9787	0.001586	0.00081	0.000945	0.0032	0	0	0	0	0	0	0	0	Hipposideros_bicolor,Hipposideros_diadema,Hipposideros_larvatus,Hipposideros_lylei	0
356	1	32.2	390	43.3333	3.24668	0.959907	1	5.85263	0.001203	0.000793	0.000939	0.00101	0.022163	0.023508	0.023683	0.009102	0.038733	0.025522	0.030222	0.032511	Hipposideros_diadema	0
357	3	1e-05	416	46.2222	4.27836	1.05243	1	17.9955	0.001514	0.000775	0.000955	0.002807	0	0	0	0	0	0	0	0	Hipposideros_bicolor,Hipposideros_larvatus,Hipposideros_lylei	0
358	1	32.2	402	44.6667	3.36739	0.97888	1	7.02002	0.001232	0.000792	0.000934	0.001405	0.022163	0.023508	0.023683	0.009102	0.039673	0.025486	0.030075	0.045235	Hipposideros_bicolor	0
359	2	10.15	427	47.4444	3.85291	1.04388	1	9.54967	0.001508	0.00079	0.000956	0.003206	0.006986	0.00741	0.007465	0.002869	0.015306	0.008017	0.009708	0.032539	Hipposideros_larvatus,Hipposideros_lylei	0
360	1	22.05	422	46.8889	3.77914	0.913548	1	11.6076	0.001373	0.000796	0.000949	0.002012	0.015177	0.016098	0.016218	0.006233	0.030282	0.01755	0.020925	0.044366	Hipposideros_larvatus	0
361	1	22.05	408	45.3333	3.2209	0.977892	1	5.8244	0.001183	0.000787	0.000937	0.000881	0.015177	0.016098	0.016218	0.006233	0.026089	0.017354	0.020661	0.019423	Hipposideros_lylei	0
362	5	33.0851	439	48.7778	4.92272	0.886168	1	19.105	0.001811	0.000832	0.001024	0.003996	0.022772	0.024154	0.024334	0.009352	0.059922	0.027543	0.033887	0.132209	Cynopterus_brachyotis,Eidolon_helvum,Pteropus_poliocephalus,Pteropus_vampyrus,Rousettus_aegyptiacus	0
363	1	25.45	439	48.7778	5.32124	1.08022	1	23.7464	0.001783	0.000828	0.001024	0.002837	0.017517	0.01858	0.018718	0.007194	0.045384	0.021072	0.026048	0.072206	Cynopterus_brachyotis	0
364	4	1.05	622	69.1111	12.7658	1.58283	3.11876	42.9974	0.00502	0.001098	0.00159	0.016415	0.000723	0.000767	0.000772	0.000297	0.005271	0.001153	0.00167	0.017236	Eidolon_helvum,Pteropus_poliocephalus,Pteropus_vampyrus,Rousettus_aegyptiacus	0
365	2	12.3	670	74.4444	14.8406	2.18961	4.35323	53.0585	0.005623	0.001291	0.002027	0.010841	0.008466	0.00898	0.009047	0.003477	0.069165	0.015881	0.024933	0.133343	Pteropus_poliocephalus,Pteropus_vampyrus	0
366	1	12.1	619	68.7778	16.0605	1.45147	3.11876	179.341	0.004319	0.001221	0.001582	0.011246	0.008328	0.008834	0.0089	0.00342	0.052254	0.014775	0.019148	0.136078	Pteropus_vampyrus	0
367	1	12.1	625	69.4444	11.4862	1.32238	3.09793	38.7497	0.004187	0.001222	0.001601	0.009341	0.008328	0.008834	0.0089	0.00342	0.050665	0.01479	0.019367	0.113025	Pteropus_poliocephalus	0
368	2	8.86667	634	70.4444	14.0441	1.12089	3.27202	87.3323	0.004484	0.001219	0.001622	0.012951	0.006103	0.006473	0.006521	0.002506	0.039754	0.010808	0.014384	0.114829	Eidolon_helvum,Rousettus_aegyptiacus	0
369	1	15.5333	671	74.5556	14.6124	1.50351	4.13144	64.4604	0.005137	0.001212	0.001919	0.010618	0.010692	0.01134	0.011425	0.004391	0.07979	0.018833	0.029804	0.164928	Eidolon_helvum	0
370	1	15.5333	666	74	11.0582	1.8441	3.93632	32.249	0.004337	0.001267	0.001886	0.005736	0.010692	0.01134	0.011425	0.004391	0.067373	0.019681	0.0293	0.089093	Rousettus_aegyptiacus	0
371	47	7.29602	473	52.5556	4.44057	1.04929	1.45959	13.529	0.001611	0.00082	0.001091	0.002522	0.005022	0.005326	0.005366	0.002062	0.011752	0.005981	0.007963	0.018402	Artibeus_jamaicensis,Artibeus_lituratus,Carollia_castanea,Carollia_perspicillata,Centurio_senex,Chiroderma_villosum,Desmodus_rotundus,Emballonura_monticola,Eptesicus_furinalis,Erophylla_sezekorni,Glossophaga_soricina,Kerivoula_intermedia,Kerivoula_papillosa,Kerivoula_pellucida,Lophostoma_brasiliense,Lophostoma_silvicolum,Micronycteris_brachyotis,Micronycteris_hirsuta,Micronycteris_microtis,Micron…	0
372	3	1.27166	484	53.7778	4.37246	0.99957	1.57805	13.8031	0.001562	0.000847	0.001093	0.002256	0.000875	0.000928	0.000935	0.000359	0.001987	0.001077	0.001389	0.002869	Emballonura_monticola,Nycteris_tragata,Taphozous_melanopogon	0
373	2	8.52956	493	54.7778	4.37065	1.07907	1.66944	16.127	0.00148	0.000837	0.001122	0.001612	0.005871	0.006227	0.006273	0.002411	0.012628	0.007142	0.00957	0.013752	Emballonura_monticola,Taphozous_melanopogon	0
374	1	45.5257	483	53.6667	3.87732	1.14102	1.47144	11.6702	0.001409	0.000844	0.001088	0.001618	0.031335	0.033236	0.033484	0.012869	0.064156	0.038426	0.049512	0.07365	Taphozous_melanopogon	0
375	1	45.5257	487	54.1111	4.50496	1.00321	1.62317	15.2411	0.001559	0.000829	0.001115	0.001988	0.031335	0.033236	0.033484	0.012869	0.070958	0.037731	0.050758	0.090527	Emballonura_monticola	0
376	1	54.0553	475	52.7778	3.81379	0.955053	1.44362	8.13376	0.001421	0.000821	0.001085	0.001805	0.037206	0.039463	0.039758	0.01528	0.076827	0.044368	0.058664	0.097564	Nycteris_tragata	0
377	44	2.67082	600	66.6667	4.83782	0.885997	2.30008	16.7454	0.001737	0.000915	0.001406	0.002121	0.001838	0.00195	0.001964	0.000755	0.004639	0.002444	0.003755	0.005665	Artibeus_jamaicensis,Artibeus_lituratus,Carollia_castanea,Carollia_perspicillata,Centurio_senex,Chiroderma_villosum,Desmodus_rotundus,Eptesicus_furinalis,Erophylla_sezekorni,Glossophaga_soricina,Kerivoula_intermedia,Kerivoula_papillosa,Kerivoula_pellucida,Lophostoma_brasiliense,Lophostoma_silvicolum,Micronycteris_brachyotis,Micronycteris_hirsuta,Micronycteris_microtis,Micronycteris_minuta,Mimon_c…	0
378	28	9.28974	626	69.5556	4.56129	1.08691	2.33322	8.01803	0.001874	0.000914	0.001447	0.002814	0.006394	0.006782	0.006833	0.002626	0.017414	0.008491	0.01344	0.026141	Artibeus_jamaicensis,Artibeus_lituratus,Carollia_castanea,Carollia_perspicillata,Centurio_senex,Chiroderma_villosum,Desmodus_rotundus,Erophylla_sezekorni,Glossophaga_soricina,Lophostoma_brasiliense,Lophostoma_silvicolum,Micronycteris_brachyotis,Micronycteris_hirsuta,Micronycteris_microtis,Micronycteris_minuta,Mimon_crenulatum,Monophyllus_redmani,Noctilio_albiventris,Noctilio_leporinus,Phyllostomu…	0
379	2	40.5988	620	68.8889	4.5455	1.02868	2.32016	11.421	0.001662	0.000918	0.001447	0.001936	0.027944	0.029639	0.02986	0.011476	0.067459	0.037266	0.058739	0.07861	Noctilio_albiventris,Noctilio_leporinus	0
380	1	2.76755	622	69.1111	5.40006	1.32385	2.32308	30.0479	0.001816	0.000922	0.001436	0.002814	0.001905	0.00202	0.002036	0.000782	0.005026	0.002551	0.003973	0.007788	Noctilio_leporinus	0
381	1	2.76755	625	69.4444	4.71099	0.921083	2.32308	13.7442	0.001741	0.000909	0.001436	0.0025	0.001905	0.00202	0.002036	0.000782	0.004818	0.002516	0.003973	0.006918	Noctilio_albiventris	0
382	26	14.3664	661	73.4444	4.47939	1.13412	2.42832	8.58874	0.001787	0.000975	0.001544	0.001942	0.009888	0.010488	0.010566	0.004061	0.02567	0.014013	0.022187	0.027894	Artibeus_jamaicensis,Artibeus_lituratus,Carollia_castanea,Carollia_perspicillata,Centurio_senex,Chiroderma_villosum,Desmodus_rotundus,Erophylla_sezekorni,Glossophaga_soricina,Lophostoma_brasiliense,Lophostoma_silvicolum,Micronycteris_brachyotis,Micronycteris_hirsuta,Micronycteris_microtis,Micronycteris_minuta,Mimon_crenulatum,Monophyllus_redmani,Phyllostomus_discolor,Phyllostomus_elongatus,Phyllo…	0
383	25	1e-05	732	81.3333	6.67072	2.68972	2.62215	29.8856	0.002341	0.001678	0.001675	0.005301	0	0	0	0	0	0	0	0	Artibeus_jamaicensis,Artibeus_lituratus,Carollia_castanea,Carollia_perspicillata,Centurio_senex,Chiroderma_villosum,Erophylla_sezekorni,Glossophaga_soricina,Lophostoma_brasiliense,Lophostoma_silvicolum,Micronycteris_brachyotis,Micronycteris_hirsuta,Micronycteris_microtis,Micronycteris_minuta,Mimon_crenulatum,Monophyllus_redmani,Phyllostomus_discolor,Phyllostomus_elongatus,Phyllostomus_hastatus,Pl…	0
384	13	5.93766	755	83.8889	6.36223	2.43031	2.70309	20.0968	0.002385	0.001692	0.001761	0.003894	0.004087	0.004335	0.004367	0.001678	0.01416	0.010048	0.010458	0.023121	Artibeus_jamaicensis,Artibeus_lituratus,Carollia_castanea,Carollia_perspicillata,Centurio_senex,Chiroderma_villosum,Erophylla_sezekorni,Glossophaga_soricina,Monophyllus_redmani,Platyrrhinus_helleri,Platyrrhinus_lineatus,Sturnira_lilium,Uroderma_bilobatum	0
385	10	1.92977	760	84.4444	7.60084	2.8841	2.72453	34.8913	0.002616	0.001792	0.001785	0.004732	0.001328	0.001409	0.001419	0.000545	0.005048	0.003458	0.003444	0.009133	Artibeus_jamaicensis,Artibeus_lituratus,Carollia_castanea,Carollia_perspicillata,Centurio_senex,Chiroderma_villosum,Platyrrhinus_helleri,Platyrrhinus_lineatus,Sturnira_lilium,Uroderma_bilobatum	0
386	8	4.06923	769	85.4444	5.72453	2.48289	2.73058	13.4628	0.002282	0.001742	0.001811	0.003128	0.002801	0.002971	0.002993	0.00115	0.009285	0.007091	0.007368	0.012728	Artibeus_jamaicensis,Artibeus_lituratus,Centurio_senex,Chiroderma_villosum,Platyrrhinus_helleri,Platyrrhinus_lineatus,Sturnira_lilium,Uroderma_bilobatum	0
387	1	17.0633	766	85.1111	5.30844	2.48644	2.71225	11.7758	0.002141	0.001792	0.001776	0.002999	0.011745	0.012457	0.01255	0.004823	0.036526	0.030569	0.030307	0.051166	Sturnira_lilium	0
388	7	3.43793	786	87.3333	6.45281	2.46652	2.84014	18.4689	0.00247	0.001809	0.00188	0.003252	0.002366	0.00251	0.002529	0.000972	0.00849	0.00622	0.006465	0.011181	Artibeus_jamaicensis,Artibeus_lituratus,Centurio_senex,Chiroderma_villosum,Platyrrhinus_helleri,Platyrrhinus_lineatus,Uroderma_bilobatum	0
389	3	1.78161	802	89.1111	9.49075	2.02252	2.9988	44.4605	0.003224	0.001819	0.001986	0.005598	0.001226	0.001301	0.00131	0.000504	0.005745	0.003242	0.003538	0.009974	Artibeus_jamaicensis,Artibeus_lituratus,Centurio_senex	0
390	1	11.8438	850	94.4444	16.4975	2.25967	3.68489	71.7982	0.00554	0.001923	0.002311	0.010483	0.008152	0.008647	0.008711	0.003348	0.065615	0.022771	0.027371	0.124154	Centurio_senex	0
391	2	9.08713	805	89.4444	8.45496	2.42332	2.97137	30.0249	0.003262	0.001724	0.001964	0.012473	0.006255	0.006634	0.006684	0.002569	0.029639	0.015668	0.017851	0.113341	Artibeus_jamaicensis,Artibeus_lituratus	0
392	1	2.75667	807	89.6667	7.2642	2.68137	2.96992	21.7029	0.002787	0.001796	0.001951	0.003755	0.001897	0.002013	0.002028	0.000779	0.007682	0.004952	0.005379	0.010352	Artibeus_lituratus	0
393	1	2.75667	806	89.5556	7.41867	2.65899	2.99251	21.8144	0.002916	0.001831	0.001966	0.004289	0.001897	0.002013	0.002028	0.000779	0.008037	0.005047	0.005419	0.011823	Artibeus_jamaicensis	0
394	4	2.1254	810	90	8.85224	2.40548	3.04931	41.8468	0.003432	0.001865	0.001981	0.005667	0.001463	0.001552	0.001563	0.000601	0.007294	0.003963	0.00421	0.012045	Chiroderma_villosum,Platyrrhinus_helleri,Platyrrhinus_lineatus,Uroderma_bilobatum	0
395	3	1.59226	812	90.2222	8.36578	2.59835	3.07606	23.1577	0.003458	0.001862	0.001997	0.005807	0.001096	0.001162	0.001171	0.00045	0.005507	0.002966	0.00318	0.009246	Platyrrhinus_helleri,Platyrrhinus_lineatus,Uroderma_bilobatum	0
396	2	1.75774	824	91.5556	13.1018	2.91294	3.30594	51.092	0.005562	0.001695	0.002106	0.0179	0.00121	0.001283	0.001293	0.000497	0.009777	0.00298	0.003702	0.031464	Platyrrhinus_helleri,Platyrrhinus_lineatus	0
397	1	8.15	817	90.7778	9.53942	2.2525	3.05226	37.1456	0.003391	0.001864	0.002001	0.007242	0.00561	0.00595	0.005994	0.002304	0.027635	0.01519	0.01631	0.059019	Platyrrhinus_lineatus	0
398	1	8.15	812	90.2222	8.06406	2.73056	3.02377	28.0002	0.003033	0.00189	0.001991	0.00461	0.00561	0.00595	0.005994	0.002304	0.024715	0.015406	0.016227	0.037572	Platyrrhinus_helleri	0
399	1	9.90774	803	89.2222	6.65682	2.50772	2.94932	14.4272	0.002701	0.001925	0.001961	0.003467	0.006819	0.007233	0.007287	0.002801	0.026758	0.019071	0.019429	0.03435	Uroderma_bilobatum	0
400	1	11.5	794	88.2222	6.4844	2.77787	2.87395	29.3796	0.002343	0.001869	0.001905	0.002152	0.007915	0.008396	0.008458	0.003251	0.02695	0.021498	0.021905	0.02475	Chiroderma_villosum	0
401	2	16.0326	760	84.4444	5.08646	2.60856	2.69524	10.9539	0.002052	0.001759	0.001735	0.002328	0.011035	0.011705	0.011792	0.004532	0.032906	0.028196	0.02782	0.037325	Carollia_castanea,Carollia_perspicillata	0
402	1	5.1	763	84.7778	5.48762	2.4904	2.70056	17.7013	0.002141	0.001753	0.001759	0.002863	0.00351	0.003723	0.003751	0.001442	0.01092	0.008942	0.008972	0.014601	Carollia_perspicillata	0
403	1	5.1	763	84.7778	5.31823	2.55798	2.70309	13.053	0.002137	0.001771	0.001763	0.002661	0.00351	0.003723	0.003751	0.001442	0.010899	0.009034	0.008994	0.01357	Carollia_castanea	0
404	3	3.79086	833	92.5556	15.8863	3.02345	3.34937	62.4071	0.00525	0.001864	0.002136	0.008189	0.002609	0.002768	0.002788	0.001072	0.019903	0.007065	0.008097	0.031043	Erophylla_sezekorni,Glossophaga_soricina,Monophyllus_redmani	0
405	2	4.25077	807	89.6667	15.5986	1.27012	3.07981	101.988	0.004056	0.001773	0.002005	0.007171	0.002926	0.003103	0.003126	0.001202	0.017241	0.007536	0.008522	0.030481	Glossophaga_soricina,Monophyllus_redmani	0
406	1	15.0207	797	88.5556	14.2969	2.6196	2.95311	145.407	0.003591	0.001721	0.001947	0.00898	0.010339	0.010966	0.011048	0.004246	0.053936	0.025851	0.02925	0.13488	Glossophaga_soricina	0
407	1	15.0207	818	90.8889	12.6416	2.73004	3.22899	43.5168	0.00432	0.001845	0.002098	0.006787	0.010339	0.010966	0.011048	0.004246	0.064894	0.027715	0.031508	0.101948	Monophyllus_redmani	0
408	1	19.2715	795	88.3333	8.85748	2.39137	2.87588	38.3893	0.002709	0.001774	0.001906	0.003225	0.013264	0.014069	0.014174	0.005448	0.052208	0.03418	0.036736	0.062144	Erophylla_sezekorni	0
409	12	1e-05	742	82.4444	6.08585	2.27242	2.63745	19.2943	0.002343	0.001661	0.001693	0.004007	0	0	0	0	0	0	0	0	Lophostoma_brasiliense,Lophostoma_silvicolum,Micronycteris_brachyotis,Micronycteris_hirsuta,Micronycteris_microtis,Micronycteris_minuta,Mimon_crenulatum,Phyllostomus_discolor,Phyllostomus_elongatus,Phyllostomus_hastatus,Tonatia_saurophila,Trachops_cirrhosus	0
410	8	7.6385	751	83.4444	5.80157	2.58854	2.69524	14.6818	0.002526	0.001701	0.001712	0.005173	0.005258	0.005577	0.005618	0.002159	0.019295	0.012994	0.013074	0.039512	Lophostoma_brasiliense,Lophostoma_silvicolum,Mimon_crenulatum,Phyllostomus_discolor,Phyllostomus_elongatus,Phyllostomus_hastatus,Tonatia_saurophila,Trachops_cirrhosus	0
411	7	3.45225	755	83.8889	6.80317	2.1389	2.70309	34.032	0.002597	0.001638	0.00173	0.004945	0.002376	0.00252	0.002539	0.000976	0.008967	0.005653	0.005973	0.017071	Lophostoma_brasiliense,Lophostoma_silvicolum,Mimon_crenulatum,Phyllostomus_discolor,Phyllostomus_elongatus,Phyllostomus_hastatus,Tonatia_saurophila	0
412	6	0.675253	752	83.5556	5.71784	2.51011	2.6612	21.0271	0.002159	0.001646	0.001704	0.002682	0.000465	0.000493	0.000497	0.000191	0.001458	0.001112	0.001151	0.001811	Lophostoma_brasiliense,Lophostoma_silvicolum,Mimon_crenulatum,Phyllostomus_discolor,Phyllostomus_elongatus,Phyllostomus_hastatus	0
413	2	8.384	758	84.2222	5.43607	2.46263	2.67871	10.7679	0.002262	0.001631	0.001714	0.002988	0.005771	0.006121	0.006166	0.00237	0.018964	0.013671	0.014372	0.025055	Lophostoma_brasiliense,Lophostoma_silvicolum	0
414	1	8.85	753	83.6667	5.76585	2.42853	2.67491	13.5912	0.002322	0.00164	0.001707	0.003647	0.006091	0.006461	0.006509	0.002502	0.020549	0.014514	0.015108	0.032277	Lophostoma_silvicolum	0
415	1	8.85	753	83.6667	4.96627	2.4581	2.63982	7.82059	0.002074	0.001617	0.001675	0.002392	0.006091	0.006461	0.006509	0.002502	0.018353	0.014311	0.014825	0.021166	Lophostoma_brasiliense	0
416	4	2.634	752	83.5556	5.61605	2.5013	2.6612	22.2856	0.002089	0.001629	0.001697	0.002426	0.001813	0.001923	0.001937	0.000745	0.005503	0.004292	0.004471	0.006391	Mimon_crenulatum,Phyllostomus_discolor,Phyllostomus_elongatus,Phyllostomus_hastatus	0
417	3	1e-05	755	83.8889	9.35154	1.99597	2.70056	101.771	0.002973	0.001689	0.001725	0.010007	0	0	0	0	0	0	0	0	Phyllostomus_discolor,Phyllostomus_elongatus,Phyllostomus_hastatus	0
418	2	8.9	759	84.3333	5.81995	2.46256	2.69912	15.5073	0.002315	0.001637	0.001731	0.003162	0.006126	0.006497	0.006546	0.002516	0.020604	0.014568	0.015404	0.028138	Phyllostomus_elongatus,Phyllostomus_hastatus	0
419	1	5.7	764	84.8889	7.04696	2.40162	2.72323	30.6653	0.002474	0.001636	0.001749	0.00363	0.003923	0.004161	0.004192	0.001611	0.014103	0.009326	0.009968	0.020688	Phyllostomus_hastatus	0
420	1	5.7	766	85.1111	7.95041	2.5774	2.73552	26.4764	0.002821	0.001639	0.00179	0.004752	0.003923	0.004161	0.004192	0.001611	0.016081	0.009341	0.010203	0.027087	Phyllostomus_elongatus	0
421	1	14.6	755	83.8889	5.55131	2.38213	2.6612	13.9498	0.002154	0.001609	0.0017	0.003023	0.010049	0.010659	0.010738	0.004127	0.031448	0.023493	0.024825	0.044142	Phyllostomus_discolor	0
422	1	14.6	755	83.8889	5.15378	2.4555	2.63767	13.2135	0.001987	0.001636	0.001686	0.001917	0.010049	0.010659	0.010738	0.004127	0.029004	0.023881	0.024613	0.027991	Mimon_crenulatum	0
423	1	17.9093	743	82.5556	4.58874	2.49476	2.61399	7.40467	0.001853	0.001657	0.001668	0.002124	0.012327	0.013075	0.013172	0.005062	0.033184	0.029673	0.02987	0.038043	Tonatia_saurophila	0
424	1	21.3615	741	82.3333	4.91167	2.55535	2.61535	11.5082	0.001961	0.001683	0.001672	0.002427	0.014703	0.015595	0.015711	0.006038	0.04188	0.035945	0.035723	0.051846	Trachops_cirrhosus	0
425	4	5.92585	759	84.3333	7.39542	2.40696	2.73309	27.6601	0.002862	0.001668	0.001783	0.005232	0.004079	0.004326	0.004358	0.001675	0.016961	0.009886	0.010568	0.031002	Micronycteris_brachyotis,Micronycteris_hirsuta,Micronycteris_microtis,Micronycteris_minuta	0
426	3	10.6756	773	85.8889	5.9042	2.55774	2.75258	12.5989	0.002458	0.001677	0.001812	0.003349	0.007348	0.007794	0.007852	0.003018	0.026237	0.017904	0.019349	0.035757	Micronycteris_hirsuta,Micronycteris_microtis,Micronycteris_minuta	0
427	2	2.89039	806	89.5556	10.0704	2.43518	3.20482	23.8532	0.004275	0.001766	0.002021	0.006827	0.001989	0.00211	0.002126	0.000817	0.012357	0.005104	0.005843	0.019734	Micronycteris_hirsuta,Micronycteris_microtis	0
428	1	9.50813	784	87.1111	7.32953	2.52738	2.86062	19.7455	0.002779	0.001673	0.001883	0.00367	0.006544	0.006941	0.006993	0.002688	0.026425	0.01591	0.017907	0.034899	Micronycteris_microtis	0
429	1	9.50813	782	86.8889	8.97527	3.00526	2.89073	48.1541	0.002971	0.001719	0.001887	0.004228	0.006544	0.006941	0.006993	0.002688	0.028252	0.016343	0.017943	0.040201	Micronycteris_hirsuta	0
430	1	12.3985	804	89.3333	8.70311	2.37069	3.04931	22.8519	0.003805	0.001805	0.001957	0.009444	0.008534	0.009052	0.009119	0.003505	0.047179	0.022381	0.02427	0.117094	Micronycteris_minuta	0
431	1	23.0741	754	83.7778	5.26322	2.62519	2.69836	12.0852	0.002059	0.001679	0.001729	0.001892	0.015882	0.016845	0.016971	0.006522	0.047521	0.03874	0.039897	0.043659	Micronycteris_brachyotis	0
432	1	29	667	74.1111	4.65723	1.12434	2.4449	8.16857	0.001932	0.001	0.001568	0.003321	0.019961	0.021172	0.02133	0.008197	0.056018	0.029006	0.045462	0.096306	Desmodus_rotundus	0
433	16	7.15612	625	69.4444	4.2234	1.10691	2.37253	6.88865	0.001694	0.000943	0.001447	0.001538	0.004926	0.005224	0.005263	0.002023	0.012124	0.006747	0.010354	0.011005	Eptesicus_furinalis,Kerivoula_intermedia,Kerivoula_papillosa,Kerivoula_pellucida,Molossus_sinaloae,Mops_mops,Murina_aenea,Murina_cyclotis,Murina_suilla,Myotis_albescens,Myotis_ater,Myotis_nigricans,Myotis_ridleyi,Myotis_simus,Phoniscus_jagorii,Scotophilus_kuhlii	0
434	14	17.5123	653	72.5556	4.78611	0.998821	2.44214	11.8757	0.001802	0.00096	0.001549	0.001909	0.012054	0.012785	0.01288	0.00495	0.031553	0.016814	0.027135	0.033437	Eptesicus_furinalis,Kerivoula_intermedia,Kerivoula_papillosa,Kerivoula_pellucida,Murina_aenea,Murina_cyclotis,Murina_suilla,Myotis_albescens,Myotis_ater,Myotis_nigricans,Myotis_ridleyi,Myotis_simus,Phoniscus_jagorii,Scotophilus_kuhlii	0
435	1	27.9877	646	71.7778	5.56087	1.07623	2.41414	29.1668	0.001834	0.000974	0.001532	0.002438	0.019264	0.020432	0.020585	0.007911	0.05134	0.027261	0.042871	0.068235	Scotophilus_kuhlii	0
436	13	1.62908	710	78.8889	6.28594	2.5917	2.6959	15.0142	0.002694	0.001112	0.001709	0.00644	0.001121	0.001189	0.001198	0.00046	0.004388	0.001811	0.002785	0.010491	Eptesicus_furinalis,Kerivoula_intermedia,Kerivoula_papillosa,Kerivoula_pellucida,Murina_aenea,Murina_cyclotis,Murina_suilla,Myotis_albescens,Myotis_ater,Myotis_nigricans,Myotis_ridleyi,Myotis_simus,Phoniscus_jagorii	0
437	7	5.38198	769	85.4444	6.70348	2.48772	3.00652	14.9289	0.00278	0.001805	0.001908	0.004133	0.003704	0.003929	0.003958	0.001521	0.014959	0.009717	0.01027	0.022243	Kerivoula_intermedia,Kerivoula_papillosa,Kerivoula_pellucida,Murina_aenea,Murina_cyclotis,Murina_suilla,Phoniscus_jagorii	0
438	4	6.47664	777	86.3333	7.14663	2.45888	3.14862	15.8085	0.002911	0.001776	0.001949	0.003628	0.004458	0.004728	0.004764	0.001831	0.018853	0.011501	0.012626	0.023495	Kerivoula_intermedia,Kerivoula_papillosa,Kerivoula_pellucida,Phoniscus_jagorii	0
439	3	1e-05	808	89.7778	10.6282	2.40739	3.41806	28.9452	0.004499	0.00183	0.002117	0.011522	0	0	0	0	0	0	0	0	Kerivoula_intermedia,Kerivoula_papillosa,Kerivoula_pellucida	0
440	1	14.5	805	89.4444	8.93102	2.45154	3.36156	19.3345	0.003747	0.001798	0.002082	0.006408	0.00998	0.010586	0.010665	0.004099	0.05433	0.026078	0.030185	0.092921	Kerivoula_pellucida	0
441	2	3.38267	829	92.1111	12.1404	2.5226	3.80527	35.1725	0.005048	0.001821	0.002242	0.011197	0.002328	0.00247	0.002488	0.000956	0.017076	0.006159	0.007585	0.037874	Kerivoula_intermedia,Kerivoula_papillosa	0
442	1	11.1173	842	93.5556	16.1993	2.51914	4.25504	56.8345	0.006326	0.001845	0.002436	0.012981	0.007652	0.008116	0.008177	0.003143	0.070329	0.020511	0.027087	0.144319	Kerivoula_intermedia	0
443	1	11.1173	830	92.2222	11.4177	2.80751	3.87915	23.9572	0.005002	0.001806	0.002273	0.009432	0.007652	0.008116	0.008177	0.003143	0.055611	0.020081	0.025269	0.104858	Kerivoula_papillosa	0
444	1	14.5	779	86.5556	7.10727	2.58675	3.09295	16.0476	0.002858	0.001804	0.00194	0.003796	0.00998	0.010586	0.010665	0.004099	0.041447	0.026158	0.02813	0.055041	Phoniscus_jagorii	0
445	3	11.1798	814	90.4444	13.6557	2.76115	3.71932	42.6812	0.005003	0.001778	0.002211	0.008911	0.007695	0.008162	0.008223	0.00316	0.055932	0.019874	0.024714	0.099625	Murina_aenea,Murina_cyclotis,Murina_suilla	0
446	2	3.69684	783	87	11.5253	2.70408	3.24513	51.8257	0.003995	0.001798	0.002031	0.007738	0.002545	0.002699	0.002719	0.001045	0.014769	0.006645	0.007507	0.028605	Murina_aenea,Murina_cyclotis	0
447	1	6.1	767	85.2222	9.74376	2.5678	3.03345	38.9716	0.003325	0.001777	0.001929	0.007474	0.004199	0.004453	0.004487	0.001724	0.020282	0.010842	0.011767	0.045592	Murina_aenea	0
448	1	6.1	766	85.1111	8.18006	2.66069	3.01768	30.1475	0.00296	0.001843	0.00192	0.004821	0.004199	0.004453	0.004487	0.001724	0.018053	0.011244	0.011714	0.029409	Murina_cyclotis	0
449	1	9.79684	767	85.2222	6.52349	2.4478	2.94894	13.7789	0.002567	0.001791	0.001901	0.002755	0.006743	0.007152	0.007206	0.002769	0.02515	0.017549	0.01862	0.026988	Murina_suilla	0
450	6	1.35862	710	78.8889	5.72765	2.44747	2.68928	13.3616	0.002188	0.001056	0.001706	0.002728	0.000935	0.000992	0.000999	0.000384	0.002973	0.001435	0.002318	0.003706	Eptesicus_furinalis,Myotis_albescens,Myotis_ater,Myotis_nigricans,Myotis_ridleyi,Myotis_simus	0
451	5	11.5306	720	80	8.88534	2.42011	2.72844	102.512	0.002438	0.001091	0.001733	0.004379	0.007936	0.008418	0.008481	0.003259	0.028115	0.012575	0.01998	0.05049	Myotis_albescens,Myotis_ater,Myotis_nigricans,Myotis_ridleyi,Myotis_simus	0
452	2	5.46944	717	79.6667	6.88724	2.53934	2.72989	26.1445	0.002452	0.001048	0.001735	0.0039	0.003765	0.003993	0.004023	0.001546	0.013409	0.005735	0.009491	0.021332	Myotis_ater,Myotis_ridleyi	0
453	1	8	718	79.7778	6.35317	2.52602	2.71225	24.2413	0.002309	0.001047	0.001732	0.003958	0.005506	0.00584	0.005884	0.002261	0.018475	0.008375	0.013852	0.031661	Myotis_ater	0
454	1	8	718	79.7778	7.94498	2.88229	2.72989	46.766	0.002379	0.001074	0.001741	0.003615	0.005506	0.00584	0.005884	0.002261	0.019032	0.008593	0.01393	0.02892	Myotis_ridleyi	0
455	3	5.88779	724	80.4444	6.33307	2.48574	2.70924	19.3276	0.00227	0.001069	0.001732	0.003086	0.004053	0.004298	0.00433	0.001664	0.013367	0.006297	0.010195	0.018167	Myotis_albescens,Myotis_nigricans,Myotis_simus	0
456	2	2.18945	729	81	5.60366	2.44062	2.71225	11.449	0.002268	0.001057	0.001735	0.002807	0.001507	0.001598	0.00161	0.000619	0.004965	0.002315	0.003799	0.006145	Myotis_albescens,Myotis_nigricans	0
457	1	5.39219	732	81.3333	5.69914	2.44743	2.728	12.0047	0.002241	0.001821	0.001763	0.00228	0.003711	0.003937	0.003966	0.001524	0.012084	0.009819	0.009508	0.012292	Myotis_nigricans	0
458	1	5.39219	732	81.3333	5.91574	2.40347	2.728	15.2412	0.00228	0.00111	0.001753	0.002682	0.003711	0.003937	0.003966	0.001524	0.012294	0.005987	0.009451	0.014463	Myotis_albescens	0
459	1	7.58164	722	80.2222	5.30915	2.47562	2.69524	11.4136	0.002057	0.001054	0.001722	0.001976	0.005218	0.005535	0.005576	0.002143	0.015596	0.007992	0.013058	0.014985	Myotis_simus	0
460	1	25	712	79.1111	5.76484	2.52795	2.69524	13.7401	0.002428	0.00115	0.001714	0.006396	0.017207	0.018251	0.018388	0.007067	0.060712	0.028739	0.042856	0.159892	Eptesicus_furinalis	0
461	2	22.3667	629	69.8889	4.24256	1.1202	2.37568	6.92353	0.001662	0.00094	0.001461	0.001301	0.015395	0.016329	0.016451	0.006322	0.037165	0.021032	0.032689	0.029108	Molossus_sinaloae,Mops_mops	0
462	1	23.1333	634	70.4444	5.49853	0.903337	2.40375	20.371	0.001995	0.000967	0.001508	0.00355	0.015923	0.016889	0.017015	0.006539	0.046159	0.02237	0.034894	0.082117	Molossus_sinaloae	0
463	1	23.1333	626	69.5556	4.7657	1.08258	2.37253	13.0115	0.001766	0.000955	0.001465	0.002324	0.015923	0.016889	0.017015	0.006539	0.040861	0.022082	0.033898	0.053756	Mops_mops	0
464	55	6.55638	146	16.2222	2.51551	1.06665	1	9.74015	0.001211	0.00074	0.00078	0.002578	0.004513	0.004787	0.004822	0.001853	0.007941	0.004851	0.005114	0.016903	Alouatta_guariba,Aotus_trivirgatus,Ateles_geoffroyi,Australopithecus_afarensis,Australopithecus_africanus,Australopithecus_anamensis,Avahi_laniger,Callicebus_torquatus,Callimico_goeldii,Callithrix_argentata,Callithrix_jacchus,Cavia_porcellus,Cebus_olivaceus,Cheirogaleus_medius,Colobus_polykomos,Eulemur_coronatus,Eulemur_mongoz,Eulemur_rubriventer,Galago_moholi,Gorilla_gorilla,Hapalemur_griseus,Ho…	0
465	4	6.36138	147	16.3333	2.00244	1.02539	1	5.63366	0.001002	0.000738	0.000769	0.001668	0.004379	0.004644	0.004679	0.001798	0.006375	0.004692	0.004892	0.010612	Cavia_porcellus,Oryctolagus_cuniculus,Rattus_norvegicus,Sciurus_carolinensis	0
466	3	7.33602	180	20	2.06004	0.980162	1	4.83185	0.001056	0.000754	0.000772	0.001686	0.005049	0.005356	0.005396	0.002074	0.007744	0.005529	0.005663	0.012367	Cavia_porcellus,Rattus_norvegicus,Sciurus_carolinensis	0
467	1	77.1981	153	17	1.78828	1.02631	1	4.0598	0.000883	0.000718	0.000762	0.00162	0.053135	0.056359	0.056779	0.021822	0.068129	0.055418	0.058864	0.125033	Cavia_porcellus	0
468	2	3.18601	183	20.3333	1.95398	1.02534	1	4.11687	0.000997	0.000739	0.000769	0.001739	0.002193	0.002326	0.002343	0.000901	0.003178	0.002355	0.002448	0.00554	Rattus_norvegicus,Sciurus_carolinensis	0
469	1	74.0121	159	17.6667	1.76551	1.01256	1	3.54006	0.000892	0.000727	0.000764	0.001221	0.050942	0.054033	0.054436	0.020921	0.065986	0.053832	0.056545	0.090392	Rattus_norvegicus	0
470	1	74.0121	158	17.5556	1.76945	0.99285	1	3.83275	0.000864	0.000734	0.000763	0.001007	0.050942	0.054033	0.054436	0.020921	0.06394	0.054344	0.056471	0.074539	Sciurus_carolinensis	0
471	1	84.5341	132	14.6667	1.67312	0.995382	1	3.33715	0.000829	0.000743	0.000767	0.000876	0.058185	0.061714	0.062175	0.023895	0.070101	0.062778	0.064838	0.07403	Oryctolagus_cuniculus	0
472	51	15.0236	375	41.6667	5.55462	0.962564	1	15.1172	0.002026	0.000807	0.000955	0.003473	0.010341	0.010968	0.01105	0.004247	0.030441	0.012121	0.014352	0.052183	Alouatta_guariba,Aotus_trivirgatus,Ateles_geoffroyi,Australopithecus_afarensis,Australopithecus_africanus,Australopithecus_anamensis,Avahi_laniger,Callicebus_torquatus,Callimico_goeldii,Callithrix_argentata,Callithrix_jacchus,Cebus_olivaceus,Cheirogaleus_medius,Colobus_polykomos,Eulemur_coronatus,Eulemur_mongoz,Eulemur_rubriventer,Galago_moholi,Gorilla_gorilla,Hapalemur_griseus,Homo_erectus,Homo_…	0
473	32	8.23506	472	52.4444	6.04088	1.14044	1.79501	13.2211	0.002319	0.000852	0.001125	0.002773	0.005668	0.006012	0.006057	0.002328	0.019096	0.007014	0.00926	0.022839	Alouatta_guariba,Aotus_trivirgatus,Ateles_geoffroyi,Australopithecus_afarensis,Australopithecus_africanus,Australopithecus_anamensis,Callicebus_torquatus,Callimico_goeldii,Callithrix_argentata,Callithrix_jacchus,Cebus_olivaceus,Colobus_polykomos,Gorilla_gorilla,Homo_erectus,Homo_ergaster,Homo_habilis,Homo_heidelbergensis,Homo_neanderthalensis,Homo_sapiens,Hylobates_lar,Lophocebus_albigena,Macaca_…	0
474	1	67.6368	459	51	5.5854	1.12331	1.06438	11.8599	0.002111	0.000831	0.001074	0.002106	0.046554	0.049378	0.049747	0.019119	0.142814	0.056205	0.072608	0.142476	Tarsius_syrichta	0
475	31	24.5773	851	94.5556	12.8735	5.47792	6.51527	24.4854	0.005333	0.004268	0.004405	0.006268	0.016916	0.017943	0.018077	0.006947	0.131074	0.104896	0.108263	0.154043	Alouatta_guariba,Aotus_trivirgatus,Ateles_geoffroyi,Australopithecus_afarensis,Australopithecus_africanus,Australopithecus_anamensis,Callicebus_torquatus,Callimico_goeldii,Callithrix_argentata,Callithrix_jacchus,Cebus_olivaceus,Colobus_polykomos,Gorilla_gorilla,Homo_erectus,Homo_ergaster,Homo_habilis,Homo_heidelbergensis,Homo_neanderthalensis,Homo_sapiens,Hylobates_lar,Lophocebus_albigena,Macaca_…	0
476	21	13.9332	883	98.1111	14.3666	5.4747	6.97376	25.7461	0.006245	0.004382	0.004663	0.009034	0.00959	0.010172	0.010248	0.003939	0.087007	0.061052	0.064974	0.125879	Australopithecus_afarensis,Australopithecus_africanus,Australopithecus_anamensis,Colobus_polykomos,Gorilla_gorilla,Homo_erectus,Homo_ergaster,Homo_habilis,Homo_heidelbergensis,Homo_neanderthalensis,Homo_sapiens,Hylobates_lar,Lophocebus_albigena,Macaca_fascicularis,Pan_paniscus,Pan_troglodytes,Paranthropus_boisei,Paranthropus_robustus,Piliocolobus_rufomitratus,Pongo_pygmaeus,Symphalangus_syndactyl…	1
477	17	9.21771	888	98.6667	16.8914	5.32724	7.00712	39.4336	0.008215	0.004402	0.004775	0.027161	0.006345	0.006729	0.00678	0.002606	0.075726	0.04058	0.044017	0.250361	Australopithecus_afarensis,Australopithecus_africanus,Australopithecus_anamensis,Gorilla_gorilla,Homo_erectus,Homo_ergaster,Homo_habilis,Homo_heidelbergensis,Homo_neanderthalensis,Homo_sapiens,Hylobates_lar,Pan_paniscus,Pan_troglodytes,Paranthropus_boisei,Paranthropus_robustus,Pongo_pygmaeus,Symphalangus_syndactylus	1
478	15	4.12726	890	98.8889	14.8168	5.45226	7.07821	28.0098	0.006365	0.004423	0.004752	0.007709	0.002841	0.003013	0.003036	0.001167	0.026269	0.018253	0.019611	0.031818	Australopithecus_afarensis,Australopithecus_africanus,Australopithecus_anamensis,Gorilla_gorilla,Homo_erectus,Homo_ergaster,Homo_habilis,Homo_heidelbergensis,Homo_neanderthalensis,Homo_sapiens,Pan_paniscus,Pan_troglodytes,Paranthropus_boisei,Paranthropus_robustus,Pongo_pygmaeus	1
479	1	15.7814	890	98.8889	14.0226	5.32989	6.94303	27.5956	0.005963	0.00435	0.004653	0.007662	0.010862	0.011521	0.011607	0.004461	0.094107	0.068657	0.073436	0.120923	Pongo_pygmaeus	1
480	14	6.87645	889	98.7778	15.9402	4.86027	7.02172	49.6723	0.006608	0.004333	0.004697	0.007813	0.004733	0.00502	0.005058	0.001944	0.045438	0.029795	0.032298	0.053727	Australopithecus_afarensis,Australopithecus_africanus,Australopithecus_anamensis,Gorilla_gorilla,Homo_erectus,Homo_ergaster,Homo_habilis,Homo_heidelbergensis,Homo_neanderthalensis,Homo_sapiens,Pan_paniscus,Pan_troglodytes,Paranthropus_boisei,Paranthropus_robustus	1
481	1	8.90496	888	98.6667	14.4128	5.36351	6.97376	25.5947	0.006174	0.004421	0.004662	0.006979	0.006129	0.006501	0.00655	0.002517	0.054977	0.039366	0.041514	0.062149	Gorilla_gorilla	1
482	13	0.219876	890	98.8889	22.0491	5.44369	7.41921	65.3075	0.008463	0.004406	0.004964	0.017463	0.000151	0.000161	0.000162	6.2e-05	0.001861	0.000969	0.001092	0.00384	Australopithecus_afarensis,Australopithecus_africanus,Australopithecus_anamensis,Homo_erectus,Homo_ergaster,Homo_habilis,Homo_heidelbergensis,Homo_neanderthalensis,Homo_sapiens,Pan_paniscus,Pan_troglodytes,Paranthropus_boisei,Paranthropus_robustus	1
483	2	5.84831	889	98.7778	22.0211	5.84692	7.4706	67.8118	0.007941	0.004348	0.004954	0.009832	0.004025	0.00427	0.004301	0.001653	0.046443	0.025429	0.02897	0.057501	Pan_paniscus,Pan_troglodytes	1
484	1	2.83678	889	98.7778	21.4404	5.40852	7.33663	64.1194	0.007987	0.004479	0.004892	0.013474	0.001953	0.002071	0.002086	0.000802	0.022656	0.012706	0.013877	0.038222	Pan_troglodytes	1
485	1	2.83678	889	98.7778	23.1266	5.9397	7.46128	65.3972	0.009676	0.004544	0.00492	0.025019	0.001953	0.002071	0.002086	0.000802	0.027449	0.01289	0.013957	0.070972	Pan_paniscus	1
486	11	2.25373	893	99.2222	52.7916	3.4388	10.008	523.199	0.014279	0.004416	0.006177	0.024712	0.001551	0.001645	0.001658	0.000637	0.032181	0.009953	0.013921	0.055695	Australopithecus_afarensis,Australopithecus_africanus,Australopithecus_anamensis,Homo_erectus,Homo_ergaster,Homo_habilis,Homo_heidelbergensis,Homo_neanderthalensis,Homo_sapiens,Paranthropus_boisei,Paranthropus_robustus	1
487	1	1.68571	894	99.3333	39.8775	6.15516	11.0698	110.332	0.015906	0.004692	0.006326	0.031152	0.00116	0.001231	0.00124	0.000477	0.026813	0.007909	0.010664	0.052513	Australopithecus_anamensis	1
488	10	0.897825	900	100	73.5348	13.8971	35.6196	154.683	0.028018	0.007054	0.024246	0.030093	0.000618	0.000655	0.00066	0.000254	0.025155	0.006333	0.021769	0.027018	Australopithecus_afarensis,Australopithecus_africanus,Homo_erectus,Homo_ergaster,Homo_habilis,Homo_heidelbergensis,Homo_neanderthalensis,Homo_sapiens,Paranthropus_boisei,Paranthropus_robustus	1
489	9	0.659627	900	100	97.7434	34.2185	43.3961	196.816	0.036607	0.028219	0.030351	0.044527	0.000454	0.000482	0.000485	0.000186	0.024147	0.018614	0.02002	0.029371	Australopithecus_africanus,Homo_erectus,Homo_ergaster,Homo_habilis,Homo_heidelbergensis,Homo_neanderthalensis,Homo_sapiens,Paranthropus_boisei,Paranthropus_robustus	1
490	2	1.88727	900	100	134.021	33.7533	45.6813	463.775	0.050051	0.027906	0.031564	0.15603	0.001299	0.001378	0.001388	0.000533	0.094459	0.052667	0.05957	0.29447	Paranthropus_boisei,Paranthropus_robustus	1
491	1	0.366459	900	100	123.66	36.0917	51.0019	224.19	0.051806	0.027976	0.034196	0.069812	0.000252	0.000268	0.00027	0.000104	0.018985	0.010252	0.012532	0.025583	Paranthropus_boisei	1
492	1	0.696273	900	100	117.012	33.0783	47.1955	255.144	0.046612	0.027273	0.032132	0.080728	0.000479	0.000508	0.000512	0.000197	0.032455	0.01899	0.022373	0.056209	Paranthropus_robustus	1
493	7	0.49472	900	100	102.808	35.907	45.3087	190.636	0.040462	0.028055	0.031211	0.04801	0.000341	0.000361	0.000364	0.00014	0.020017	0.013879	0.015441	0.023751	Australopithecus_africanus,Homo_erectus,Homo_ergaster,Homo_habilis,Homo_heidelbergensis,Homo_neanderthalensis,Homo_sapiens	1
494	1	0.934471	900	100	102.37	33.6167	45.0511	231.321	0.037815	0.027976	0.030974	0.044948	0.000643	0.000682	0.000687	0.000264	0.035337	0.026143	0.028945	0.042003	Australopithecus_africanus	1
495	6	0.476397	900	100	174.173	46.7709	51.8536	797.264	0.060109	0.0282	0.034335	0.10125	0.000328	0.000348	0.00035	0.000135	0.028636	0.013434	0.016357	0.048235	Homo_erectus,Homo_ergaster,Homo_habilis,Homo_heidelbergensis,Homo_neanderthalensis,Homo_sapiens	1
496	1	1.24596	900	100	98.6547	35.0031	46.7618	183.766	0.038189	0.028619	0.031735	0.053601	0.000858	0.00091	0.000916	0.000352	0.047582	0.035658	0.039541	0.066785	Homo_habilis	1
497	5	1.08106	900	100	113.853	34.1964	47.8496	242.885	0.043928	0.029169	0.032682	0.059473	0.000744	0.000789	0.000795	0.000306	0.047489	0.031533	0.035331	0.064293	Homo_erectus,Homo_ergaster,Homo_heidelbergensis,Homo_neanderthalensis,Homo_sapiens	1
498	1	0.531366	900	100	127.892	37.8224	48.4416	409.821	0.045652	0.028904	0.033006	0.061774	0.000366	0.000388	0.000391	0.00015	0.024258	0.015358	0.017538	0.032825	Homo_ergaster	1
499	4	0.421428	900	100	109.109	36.605	47.5714	204.97	0.043396	0.028238	0.032371	0.059869	0.00029	0.000308	0.00031	0.000119	0.018288	0.0119	0.013642	0.02523	Homo_erectus,Homo_heidelbergensis,Homo_neanderthalensis,Homo_sapiens	1
500	3	0.787888	900	100	106.278	35.2257	46.9388	211.296	0.040921	0.028967	0.032069	0.05657	0.000542	0.000575	0.000579	0.000223	0.032241	0.022823	0.025267	0.044571	Homo_heidelbergensis,Homo_neanderthalensis,Homo_sapiens	1
501	1	1.61242	900	100	103.846	34.5357	46.8029	202.235	0.038947	0.028549	0.031789	0.035741	0.00111	0.001177	0.001186	0.000456	0.062798	0.046033	0.051257	0.05763	Homo_sapiens	1
502	2	0.549689	900	100	118.466	35.3689	48.3968	223.241	0.050155	0.029154	0.032628	0.088263	0.000378	0.000401	0.000404	0.000155	0.02757	0.016026	0.017935	0.048517	Homo_heidelbergensis,Homo_neanderthalensis	1
503	1	0.384782	900	100	117.899	34.4666	47.0599	333.108	0.043108	0.028261	0.032069	0.060192	0.000265	0.000281	0.000283	0.000109	0.016587	0.010874	0.01234	0.023161	Homo_heidelbergensis	1
504	1	0.916148	900	100	106.863	35.7039	47.0599	216.119	0.041691	0.028956	0.032069	0.050248	0.000631	0.000669	0.000674	0.000259	0.038195	0.026528	0.02938	0.046034	Homo_neanderthalensis	1
505	1	0.586335	900	100	105.156	34.7574	46.7618	201.875	0.039134	0.028146	0.031789	0.035085	0.000404	0.000428	0.000431	0.000166	0.022945	0.016503	0.018639	0.020571	Homo_erectus	1
506	1	1.24596	900	100	84.0491	13.7163	35.4749	221.229	0.030864	0.007299	0.024375	0.049539	0.000858	0.00091	0.000916	0.000352	0.038455	0.009094	0.030371	0.061724	Australopithecus_afarensis	1
507	2	12.1348	888	98.6667	14.4086	5.51689	6.97727	25.7781	0.006622	0.004508	0.004679	0.013461	0.008352	0.008859	0.008925	0.00343	0.080355	0.054699	0.056783	0.163351	Hylobates_lar,Symphalangus_syndactylus	1
508	1	7.77389	890	98.8889	15.3565	5.59372	6.97727	30.2157	0.006573	0.004364	0.004755	0.011883	0.005351	0.005675	0.005718	0.002197	0.051096	0.033924	0.036967	0.092376	Hylobates_lar	1
509	1	7.77389	889	98.7778	16.3916	5.53141	7.00656	56.4235	0.006524	0.004348	0.00474	0.009112	0.005351	0.005675	0.005718	0.002197	0.050713	0.033802	0.036847	0.070833	Symphalangus_syndactylus	1
510	4	12.0724	896	99.5556	20.6035	6.30373	7.6585	60.431	0.008821	0.004543	0.005218	0.019311	0.008309	0.008814	0.008879	0.003413	0.106486	0.054849	0.062991	0.233134	Colobus_polykomos,Lophocebus_albigena,Macaca_fascicularis,Piliocolobus_rufomitratus	1
511	2	7.66273	899	99.8889	56.8162	8.60836	12.8412	173.118	0.022523	0.006156	0.007564	0.087039	0.005274	0.005594	0.005636	0.002166	0.17259	0.047173	0.057962	0.666957	Colobus_polykomos,Piliocolobus_rufomitratus	1
512	1	9.39122	896	99.5556	24.1398	6.47328	8.20682	68.8898	0.011005	0.004296	0.005416	0.039712	0.006464	0.006856	0.006907	0.002655	0.103346	0.040347	0.050865	0.372942	Piliocolobus_rufomitratus	1
513	1	9.39122	896	99.5556	24.7203	6.62765	8.25363	64.7915	0.010539	0.004632	0.005467	0.017221	0.006464	0.006856	0.006907	0.002655	0.098974	0.043497	0.051339	0.161727	Colobus_polykomos	1
514	2	6.49852	898	99.7778	35.8285	6.50183	9.95922	100.176	0.015358	0.005014	0.006167	0.026778	0.004473	0.004744	0.00478	0.001837	0.099806	0.032586	0.040075	0.174019	Lophocebus_albigena,Macaca_fascicularis	1
515	1	10.5554	897	99.6667	28.4045	5.21407	8.20682	147.054	0.01103	0.005079	0.005431	0.038596	0.007265	0.007706	0.007764	0.002984	0.116427	0.053608	0.05733	0.407398	Lophocebus_albigena	1
516	1	10.5554	897	99.6667	26.7562	5.96824	8.40485	72.7338	0.011201	0.004597	0.005618	0.017761	0.007265	0.007706	0.007764	0.002984	0.118228	0.048524	0.059297	0.187479	Macaca_fascicularis	1
517	10	21.7462	886	98.4444	22.6881	5.75396	7.5218	56.7534	0.009316	0.004355	0.005052	0.015867	0.014968	0.015876	0.015994	0.006147	0.202582	0.0947	0.109865	0.345051	Alouatta_guariba,Aotus_trivirgatus,Ateles_geoffroyi,Callicebus_torquatus,Callimico_goeldii,Callithrix_argentata,Callithrix_jacchus,Cebus_olivaceus,Saguinus_fuscicollis,Saimiri_sciureus	1
518	1	21.3133	894	99.3333	16.1145	5.72333	7.07916	32.2976	0.006804	0.004306	0.004835	0.010476	0.01467	0.01556	0.015676	0.006025	0.14502	0.091778	0.10306	0.223268	Callicebus_torquatus	1
519	9	1.13835	881	97.8889	18.5302	6.20961	6.7645	103.327	0.006908	0.004261	0.00451	0.014597	0.000784	0.000831	0.000837	0.000322	0.007864	0.004851	0.005134	0.016617	Alouatta_guariba,Aotus_trivirgatus,Ateles_geoffroyi,Callimico_goeldii,Callithrix_argentata,Callithrix_jacchus,Cebus_olivaceus,Saguinus_fuscicollis,Saimiri_sciureus	1
520	7	1.09433	880	97.7778	17.6449	4.69037	6.79474	68.0552	0.006697	0.004279	0.004571	0.01159	0.000753	0.000799	0.000805	0.000309	0.007329	0.004683	0.005002	0.012683	Aotus_trivirgatus,Callimico_goeldii,Callithrix_argentata,Callithrix_jacchus,Cebus_olivaceus,Saguinus_fuscicollis,Saimiri_sciureus	1
521	5	1.53857	880	97.7778	14.4342	5.28618	6.58408	28.95	0.006028	0.004171	0.004428	0.011095	0.001059	0.001123	0.001132	0.000435	0.009275	0.006418	0.006812	0.01707	Aotus_trivirgatus,Callimico_goeldii,Callithrix_argentata,Callithrix_jacchus,Saguinus_fuscicollis	1
522	4	4.50019	880	97.7778	13.3254	5.08393	6.58408	32.0741	0.005279	0.004196	0.004411	0.004821	0.003097	0.003285	0.00331	0.001272	0.023756	0.018881	0.01985	0.021694	Callimico_goeldii,Callithrix_argentata,Callithrix_jacchus,Saguinus_fuscicollis	1
523	1	13.0419	880	97.7778	14.0671	5.11974	6.48477	42.291	0.005251	0.004271	0.004394	0.005633	0.008977	0.009521	0.009592	0.003687	0.068479	0.055704	0.057305	0.073459	Saguinus_fuscicollis	1
524	3	2.67958	881	97.8889	17.3903	5.56666	6.52779	78.4452	0.006495	0.004201	0.004384	0.015234	0.001844	0.001956	0.001971	0.000757	0.017403	0.011257	0.011748	0.04082	Callimico_goeldii,Callithrix_argentata,Callithrix_jacchus	1
525	2	5.53638	883	98.1111	14.4668	4.935	6.50987	36.4228	0.005593	0.004254	0.004394	0.006502	0.003811	0.004042	0.004072	0.001565	0.030967	0.023553	0.024327	0.035995	Callithrix_argentata,Callithrix_jacchus	1
526	1	4.82596	883	98.1111	14.0621	4.99423	6.4439	34.9444	0.00549	0.004195	0.00434	0.006726	0.003322	0.003523	0.003549	0.001364	0.026495	0.020245	0.020947	0.032461	Callithrix_jacchus	1
527	1	4.82596	884	98.2222	15.6213	4.94396	6.4817	45.3212	0.005923	0.004159	0.004379	0.00935	0.003322	0.003523	0.003549	0.001364	0.028586	0.020072	0.021134	0.045121	Callithrix_argentata	1
528	1	10.3623	882	98	14.0864	5.11373	6.47643	35.006	0.00542	0.004239	0.004394	0.006304	0.007132	0.007565	0.007622	0.002929	0.056164	0.043924	0.045532	0.065325	Callimico_goeldii	1
529	1	17.5421	881	97.8889	13.1821	5.376	6.64525	23.693	0.005519	0.004289	0.004456	0.007109	0.012074	0.012807	0.012902	0.004959	0.096818	0.075243	0.078167	0.124711	Aotus_trivirgatus	1
530	2	2.33241	886	98.4444	20.1887	6.21267	7.10959	73.9644	0.007477	0.004402	0.004878	0.011493	0.001605	0.001703	0.001715	0.000659	0.01744	0.010267	0.011377	0.026807	Cebus_olivaceus,Saimiri_sciureus	1
531	1	16.7483	886	98.4444	18.1331	5.74702	7.12126	45.1993	0.006967	0.004395	0.004856	0.009156	0.011528	0.012227	0.012318	0.004734	0.116687	0.073605	0.081336	0.153341	Cebus_olivaceus	1
532	1	16.7483	899	99.8889	24.3918	5.66325	7.98609	57.0091	0.010081	0.00443	0.005341	0.01531	0.011528	0.012227	0.012318	0.004734	0.168847	0.074199	0.089457	0.256414	Saimiri_sciureus	1
533	2	5.09006	882	98	15.035	5.49253	6.66857	35.4709	0.006122	0.004268	0.004492	0.012271	0.003503	0.003716	0.003744	0.001439	0.031162	0.021726	0.022866	0.06246	Alouatta_guariba,Ateles_geoffroyi	1
534	1	15.0849	880	97.7778	15.1101	5.53103	6.66702	40.3437	0.00588	0.004343	0.004495	0.007782	0.010383	0.011013	0.011095	0.004264	0.088694	0.065521	0.067811	0.117396	Ateles_geoffroyi	1
535	1	15.0849	880	97.7778	13.5446	5.4356	6.57574	26.4369	0.005404	0.0043	0.004492	0.005526	0.010383	0.011013	0.011095	0.004264	0.08152	0.064858	0.067761	0.083359	Alouatta_guariba	1
536	19	15.0719	396	44	6.26766	0.977536	1	32.0879	0.00183	0.000851	0.000978	0.003258	0.010374	0.011003	0.011085	0.00426	0.027579	0.012832	0.01474	0.049098	Avahi_laniger,Cheirogaleus_medius,Eulemur_coronatus,Eulemur_mongoz,Eulemur_rubriventer,Galago_moholi,Hapalemur_griseus,Lemur_catta,Lepilemur_leucopus,Microcebus_murinus,Mirza_coquereli,Nycticebus_coucang,Nycticebus_pygmaeus,Otolemur_crassicaudatus,Perodicticus_potto,Propithecus_coquereli,Propithecus_diadema,Propithecus_tattersalli,Varecia_rubra	0
537	14	23.5	407	45.2222	5.2645	1.03888	1	14.8216	0.001693	0.000828	0.001004	0.002179	0.016175	0.017156	0.017284	0.006643	0.039784	0.019464	0.023606	0.051212	Avahi_laniger,Cheirogaleus_medius,Eulemur_coronatus,Eulemur_mongoz,Eulemur_rubriventer,Hapalemur_griseus,Lemur_catta,Lepilemur_leucopus,Microcebus_murinus,Mirza_coquereli,Propithecus_coquereli,Propithecus_diadema,Propithecus_tattersalli,Varecia_rubra	0
538	8	1e-05	461	51.2222	7.3697	1.37427	1.17897	39.8402	0.002384	0.00089	0.001099	0.007079	0	0	0	0	0	0	0	0	Avahi_laniger,Cheirogaleus_medius,Lepilemur_leucopus,Microcebus_murinus,Mirza_coquereli,Propithecus_coquereli,Propithecus_diadema,Propithecus_tattersalli	0
539	4	11.9551	485	53.8889	6.4742	1.00961	1.85071	27.1106	0.002103	0.000859	0.001157	0.003447	0.008229	0.008728	0.008793	0.003379	0.025136	0.010268	0.01383	0.041204	Avahi_laniger,Propithecus_coquereli,Propithecus_diadema,Propithecus_tattersalli	0
540	3	15.3449	528	58.6667	6.83406	1.24303	2.41718	19.875	0.002449	0.000925	0.001417	0.004023	0.010562	0.011203	0.011286	0.004338	0.037576	0.014188	0.021743	0.061726	Propithecus_coquereli,Propithecus_diadema,Propithecus_tattersalli	0
541	2	5.44677	587	65.2222	8.33297	1.35498	3.27007	21.4221	0.00352	0.000918	0.001937	0.009503	0.003749	0.003976	0.004006	0.00154	0.019171	0.004998	0.010551	0.051762	Propithecus_coquereli,Propithecus_tattersalli	0
542	1	4.55323	683	75.8889	11.6578	2.02236	4.8358	31.3491	0.004797	0.001171	0.002683	0.00722	0.003134	0.003324	0.003349	0.001287	0.021843	0.005331	0.012216	0.032874	Propithecus_tattersalli	0
543	1	4.55323	613	68.1111	10.5253	1.52861	3.70954	43.8267	0.00384	0.001052	0.002146	0.007361	0.003134	0.003324	0.003349	0.001287	0.017485	0.00479	0.009771	0.033516	Propithecus_coquereli	0
544	1	10	529	58.7778	6.68708	1.166	2.37537	19.6313	0.00231	0.000908	0.001393	0.003896	0.006883	0.007301	0.007355	0.002827	0.023104	0.009083	0.013933	0.038956	Propithecus_diadema	0
545	1	25.3449	474	52.6667	5.52332	1.12883	1.46611	11.732	0.001931	0.000876	0.001133	0.002036	0.017445	0.018503	0.018641	0.007164	0.048931	0.022193	0.028716	0.051605	Avahi_laniger	0
546	4	1e-05	504	56	6.80817	1.13218	2.1233	17.7795	0.00268	0.000859	0.001239	0.007147	0	0	0	0	0	0	0	0	Cheirogaleus_medius,Lepilemur_leucopus,Microcebus_murinus,Mirza_coquereli	0
547	1	37.3	493	54.7778	5.59124	1.02569	1.92753	10.6368	0.00209	0.000889	0.001174	0.002317	0.025673	0.027231	0.027434	0.010544	0.077957	0.033143	0.043809	0.086408	Lepilemur_leucopus	0
548	3	10.0093	609	67.6667	8.88403	1.40095	3.63448	20.9626	0.003517	0.000979	0.00213	0.005033	0.006889	0.007307	0.007362	0.002829	0.035199	0.009797	0.021323	0.05038	Cheirogaleus_medius,Microcebus_murinus,Mirza_coquereli	0
549	2	8.35394	704	78.2222	12.3886	2.272	5.41209	30.4771	0.005508	0.001574	0.002944	0.016286	0.00575	0.006099	0.006144	0.002361	0.046015	0.01315	0.024597	0.136053	Microcebus_murinus,Mirza_coquereli	0
550	1	18.9368	707	78.5556	14.5914	2.48126	5.53978	42.2022	0.00623	0.00142	0.003023	0.012292	0.013034	0.013825	0.013928	0.005353	0.117985	0.026882	0.057252	0.232776	Mirza_coquereli	0
551	1	18.9368	874	97.1111	20.9976	5.33813	9.61635	42.625	0.009518	0.003291	0.005681	0.015227	0.013034	0.013825	0.013928	0.005353	0.180233	0.062328	0.107572	0.288342	Microcebus_murinus	1
552	1	27.2907	608	67.5556	9.13606	1.26728	3.60044	21.4835	0.003611	0.000998	0.00213	0.005404	0.018784	0.019924	0.020072	0.007714	0.098534	0.027248	0.058138	0.147477	Cheirogaleus_medius	0
553	6	10.5107	424	47.1111	4.66654	1.01874	1	9.04237	0.001634	0.000834	0.001026	0.001516	0.007234	0.007673	0.007731	0.002971	0.017172	0.008763	0.010784	0.015933	Eulemur_coronatus,Eulemur_mongoz,Eulemur_rubriventer,Hapalemur_griseus,Lemur_catta,Varecia_rubra	0
554	1	26.7893	432	48	5.27357	1.13068	1	12.6147	0.001807	0.000847	0.001035	0.002574	0.018439	0.019558	0.019704	0.007573	0.048405	0.022678	0.027727	0.068965	Varecia_rubra	0
555	5	6.11567	444	49.3333	5.01268	1.07971	1	11.7166	0.001728	0.000857	0.00104	0.002106	0.004209	0.004465	0.004498	0.001729	0.010567	0.005242	0.006358	0.012877	Eulemur_coronatus,Eulemur_mongoz,Eulemur_rubriventer,Hapalemur_griseus,Lemur_catta	0
556	2	7.27367	484	53.7778	5.31443	1.09298	1.56451	10.7766	0.002134	0.000904	0.001129	0.005176	0.005006	0.00531	0.00535	0.002056	0.015524	0.006576	0.008209	0.037647	Hapalemur_griseus,Lemur_catta	0
557	1	13.4	506	56.2222	7.2126	0.940543	1.97163	34.0507	0.00251	0.00087	0.001195	0.005766	0.009223	0.009783	0.009856	0.003788	0.033635	0.011661	0.016018	0.07727	Lemur_catta	0
558	1	13.4	517	57.4444	6.07849	1.12747	2.18516	11.5409	0.002543	0.000859	0.001268	0.004986	0.009223	0.009783	0.009856	0.003788	0.034073	0.011509	0.016993	0.066806	Hapalemur_griseus	0
559	3	11.5834	441	49	4.72525	1.03982	1	9.09108	0.00166	0.000837	0.001035	0.001648	0.007973	0.008456	0.00852	0.003274	0.01923	0.009694	0.011989	0.01909	Eulemur_coronatus,Eulemur_mongoz,Eulemur_rubriventer	0
560	1	9.09028	443	49.2222	4.98985	0.967475	1	11.3193	0.001865	0.000903	0.001034	0.005658	0.006257	0.006636	0.006686	0.00257	0.016952	0.008205	0.009396	0.051434	Eulemur_rubriventer	0
561	2	1.75717	459	51	5.08292	1.04657	1	10.1169	0.001862	0.000849	0.001052	0.002515	0.001209	0.001283	0.001292	0.000497	0.003273	0.001492	0.001849	0.004419	Eulemur_coronatus,Eulemur_mongoz	0
562	1	7.3331	458	50.8889	4.80747	1.02328	1	9.06734	0.001733	0.000852	0.00105	0.001716	0.005047	0.005354	0.005393	0.002073	0.012707	0.006245	0.007698	0.012582	Eulemur_mongoz	0
563	1	7.3331	459	51	5.10458	0.978377	1	11.5884	0.001879	0.000862	0.001044	0.003846	0.005047	0.005354	0.005393	0.002073	0.013776	0.006322	0.007659	0.028201	Eulemur_coronatus	0
564	5	24.4987	387	43	4.34513	1.05619	1	8.54408	0.001486	0.000817	0.000958	0.001155	0.016862	0.017885	0.018019	0.006925	0.036409	0.020015	0.02347	0.028287	Galago_moholi,Nycticebus_coucang,Nycticebus_pygmaeus,Otolemur_crassicaudatus,Perodicticus_potto	0
565	3	0.229789	404	44.8889	5.87697	1.19246	1	17.9379	0.002092	0.000803	0.000978	0.004866	0.000158	0.000168	0.000169	6.5e-05	0.000481	0.000184	0.000225	0.001118	Nycticebus_coucang,Nycticebus_pygmaeus,Perodicticus_potto	0
566	1	36.0715	418	46.4444	5.09899	1.11477	1	18.507	0.001687	0.000847	0.000994	0.002178	0.024828	0.026334	0.026531	0.010196	0.060854	0.030553	0.035873	0.078577	Perodicticus_potto	0
567	2	24.4192	411	45.6667	4.46863	0.977851	1	8.74325	0.001595	0.00082	0.000966	0.001926	0.016808	0.017827	0.01796	0.006903	0.038944	0.020022	0.023601	0.047024	Nycticebus_coucang,Nycticebus_pygmaeus	0
568	1	11.6523	410	45.5556	4.59873	0.950168	1	9.10917	0.001644	0.000823	0.000966	0.002075	0.00802	0.008507	0.00857	0.003294	0.019158	0.009594	0.011262	0.024183	Nycticebus_pygmaeus	0
569	1	11.6523	415	46.1111	4.61556	0.943087	1	9.11054	0.001648	0.00083	0.000971	0.002055	0.00802	0.008507	0.00857	0.003294	0.019207	0.009671	0.011313	0.023942	Nycticebus_coucang	0
570	2	14.0013	404	44.8889	5.19868	1.11091	1	14.2943	0.001757	0.00084	0.000978	0.002433	0.009637	0.010222	0.010298	0.003958	0.0246	0.011757	0.013693	0.034061	Galago_moholi,Otolemur_crassicaudatus	0
571	1	22.3	427	47.4444	5.10533	1.00585	1	10.6808	0.001895	0.00083	0.001027	0.002698	0.015349	0.01628	0.016402	0.006304	0.042252	0.018512	0.022902	0.060161	Otolemur_crassicaudatus	0
572	1	22.3	400	44.4444	5.00611	1.07207	1	11.2671	0.001755	0.000816	0.000975	0.002452	0.015349	0.01628	0.016402	0.006304	0.039147	0.018207	0.021743	0.054686	Galago_moholi	0
573	9	58.3654	60	6.66667	1.19284	0.986269	1	2.0255	0.000784	0.000747	0.00074	0.001216	0.040173	0.04261	0.042928	0.016498	0.045763	0.043593	0.04319	0.070946	Dasyurus_hallucatus,Dasyurus_maculatus,Dasyurus_viverrinus,Didelphis_virginiana,Didelphodon_vorax,Monodelphis_domestica,Nimbacinus_dicksoni,Sarcophilus_harrisii,Thylacinus_cynocephalus	0
574	8	21.0937	81	9	1.33906	0.992605	1	3.1242	0.000821	0.000727	0.000739	0.001134	0.014519	0.0154	0.015514	0.005963	0.017313	0.01533	0.015578	0.023913	Dasyurus_hallucatus,Dasyurus_maculatus,Dasyurus_viverrinus,Didelphis_virginiana,Monodelphis_domestica,Nimbacinus_dicksoni,Sarcophilus_harrisii,Thylacinus_cynocephalus	0
575	2	42.0063	86	9.55556	1.19083	0.996156	1	1.40824	0.000787	0.000732	0.000731	0.000987	0.028913	0.030667	0.030896	0.011874	0.03306	0.03075	0.030686	0.041472	Didelphis_virginiana,Monodelphis_domestica	0
576	1	42.2	78	8.66667	1.20174	0.996492	1	1.65883	0.000786	0.000743	0.000737	0.001144	0.029046	0.030808	0.031038	0.011929	0.033172	0.031351	0.031101	0.048268	Monodelphis_domestica	0
577	1	42.2	73	8.11111	1.12971	1.00507	1	1.15077	0.000736	0.000729	0.00073	0.000673	0.029046	0.030808	0.031038	0.011929	0.031049	0.030753	0.030806	0.0284	Didelphis_virginiana	0
578	6	47.9063	108	12	1.39527	0.983769	1	2.19695	0.000751	0.000731	0.000736	0.000675	0.032974	0.034974	0.035235	0.013542	0.035992	0.035034	0.035235	0.032354	Dasyurus_hallucatus,Dasyurus_maculatus,Dasyurus_viverrinus,Nimbacinus_dicksoni,Sarcophilus_harrisii,Thylacinus_cynocephalus	0
579	4	31.5	123	13.6667	1.39962	1.00223	1	1.90072	0.000771	0.000733	0.000733	0.000772	0.021681	0.022997	0.023168	0.008904	0.024302	0.023089	0.023105	0.024326	Dasyurus_hallucatus,Dasyurus_maculatus,Dasyurus_viverrinus,Sarcophilus_harrisii	0
580	3	0.1	162	18	1.79055	0.964595	1	3.39005	0.00095	0.000728	0.000746	0.0019	6.9e-05	7.3e-05	7.4e-05	2.8e-05	9.5e-05	7.3e-05	7.5e-05	0.00019	Dasyurus_hallucatus,Dasyurus_maculatus,Dasyurus_viverrinus	0
581	1	4.7	144	16	1.77426	0.965951	1	4.50005	0.000884	0.000737	0.000742	0.001832	0.003235	0.003431	0.003457	0.001329	0.004153	0.003462	0.003487	0.008611	Dasyurus_hallucatus	0
582	2	0.2	175	19.4444	2.12589	0.981214	1	5.29712	0.001189	0.000702	0.000747	0.003304	0.000138	0.000146	0.000147	5.7e-05	0.000238	0.00014	0.000149	0.000661	Dasyurus_maculatus,Dasyurus_viverrinus	0
583	1	4.5	159	17.6667	1.8709	0.967646	1	4.82372	0.00096	0.000728	0.00074	0.002253	0.003097	0.003285	0.00331	0.001272	0.004318	0.003277	0.00333	0.010137	Dasyurus_viverrinus	0
584	1	4.5	165	18.3333	1.85871	1.04198	1	4.54382	0.000945	0.00073	0.000744	0.00188	0.003097	0.003285	0.00331	0.001272	0.004251	0.003286	0.003348	0.008459	Dasyurus_maculatus	0
585	1	4.8	126	14	1.48007	0.999277	1	2.18006	0.000791	0.000729	0.00074	0.000832	0.003304	0.003504	0.00353	0.001357	0.003799	0.003498	0.003552	0.003992	Sarcophilus_harrisii	0
586	2	15.97	140	15.5556	1.70041	0.963283	1	3.29796	0.000934	0.000722	0.000741	0.001673	0.010992	0.011659	0.011746	0.004514	0.014918	0.011537	0.011834	0.026724	Nimbacinus_dicksoni,Thylacinus_cynocephalus	0
587	1	20.33	160	17.7778	2.0063	0.969617	1	4.24257	0.00095	0.000728	0.000747	0.001817	0.013993	0.014842	0.014953	0.005747	0.019311	0.014802	0.015187	0.036931	Thylacinus_cynocephalus	0
588	1	4.362	154	17.1111	1.99458	0.969672	1	4.31018	0.001041	0.000739	0.000746	0.002196	0.003002	0.003184	0.003208	0.001233	0.004539	0.003222	0.003254	0.00958	Nimbacinus_dicksoni	0
589	1	39.3	53	5.88889	1.08982	1.00828	1	0.906697	0.00072	0.000732	0.000734	0.0005	0.02705	0.028691	0.028905	0.011109	0.028302	0.028767	0.028866	0.019654	Didelphodon_vorax	0
590	139	42.7472	121	13.4444	1.91404	0.999465	1	3.13625	0.000812	0.000726	0.000763	0.000599	0.029423	0.031208	0.031441	0.012083	0.034725	0.031037	0.032616	0.025598	Accipiter_cooperii,Accipiter_striatus,Alligator_mississippiensis,Alligator_sinensis,Allosaurus_fragilis,Amadina_erythrocephala,Amadina_fasciata,Anolis_chloris,Anolis_cristatellus,Anolis_distichus,Anolis_equestris,Anolis_garmani,Anolis_gundlachi,Anolis_limifrons,Anolis_oxylophus,Anolis_pulchellus,Anolis_sheplani,Anolis_valencienni,Apalone_ferox,Archaeopteryx_lithographica,Batagur_borneoensis,Brant…	0
591	115	25.1851	246	27.3333	2.91833	0.948892	1	7.10102	0.001092	0.000741	0.000824	0.001321	0.017335	0.018386	0.018524	0.007119	0.027514	0.01865	0.020765	0.03326	Accipiter_cooperii,Accipiter_striatus,Alligator_mississippiensis,Alligator_sinensis,Allosaurus_fragilis,Amadina_erythrocephala,Amadina_fasciata,Apalone_ferox,Archaeopteryx_lithographica,Batagur_borneoensis,Branta_canadensis,Buteo_buteo,Cactospiza_pallida,Caiman_crocodilus,Caiman_latirostris,Caiman_yacare,Camarhynchus_parvulus,Camarhynchus_psittacula,Carduelis_chloris,Carduelis_flammea,Carduelis_s…	0
592	100	1.39157	307	34.1111	3.85729	1.02852	1	8.63684	0.001536	0.000743	0.000849	0.002588	0.000958	0.001016	0.001024	0.000393	0.002137	0.001034	0.001182	0.003602	Accipiter_cooperii,Accipiter_striatus,Alligator_mississippiensis,Alligator_sinensis,Allosaurus_fragilis,Amadina_erythrocephala,Amadina_fasciata,Archaeopteryx_lithographica,Branta_canadensis,Buteo_buteo,Cactospiza_pallida,Caiman_crocodilus,Caiman_latirostris,Caiman_yacare,Camarhynchus_parvulus,Camarhynchus_psittacula,Carduelis_chloris,Carduelis_flammea,Carduelis_sinica,Carduelis_spinus,Cariama_cri…	0
593	99	12.8631	619	68.7778	16.8966	1.71766	5.77897	44.2593	0.006743	0.001354	0.002814	0.009407	0.008854	0.009391	0.009461	0.003636	0.086733	0.017416	0.036202	0.121004	Accipiter_cooperii,Accipiter_striatus,Alligator_mississippiensis,Alligator_sinensis,Allosaurus_fragilis,Amadina_erythrocephala,Amadina_fasciata,Archaeopteryx_lithographica,Branta_canadensis,Buteo_buteo,Cactospiza_pallida,Caiman_crocodilus,Caiman_latirostris,Caiman_yacare,Camarhynchus_parvulus,Camarhynchus_psittacula,Carduelis_chloris,Carduelis_flammea,Carduelis_sinica,Carduelis_spinus,Cariama_cri…	0
594	26	1.33686	365	40.5556	4.31213	0.951721	1	9.48967	0.001762	0.000803	0.000882	0.003476	0.00092	0.000976	0.000983	0.000378	0.002356	0.001073	0.001179	0.004647	Alligator_mississippiensis,Alligator_sinensis,Caiman_crocodilus,Caiman_latirostris,Caiman_yacare,Crocodylus_acutus,Crocodylus_intermedius,Crocodylus_johnsoni,Crocodylus_mindorensis,Crocodylus_moreletii,Crocodylus_niloticus,Crocodylus_novaeguineae,Crocodylus_palustris,Crocodylus_porosus,Crocodylus_rhombifer,Crocodylus_siamensis,Gavialis_gangeticus,Mecistops_cataphractus,Melanosuchus_niger,Ornithos…	0
595	25	0.1	384	42.6667	4.68163	0.819208	1	16.1131	0.001778	0.000773	0.000876	0.002939	6.9e-05	7.3e-05	7.4e-05	2.8e-05	0.000178	7.7e-05	8.8e-05	0.000294	Alligator_mississippiensis,Alligator_sinensis,Caiman_crocodilus,Caiman_latirostris,Caiman_yacare,Crocodylus_acutus,Crocodylus_intermedius,Crocodylus_johnsoni,Crocodylus_mindorensis,Crocodylus_moreletii,Crocodylus_niloticus,Crocodylus_novaeguineae,Crocodylus_palustris,Crocodylus_porosus,Crocodylus_rhombifer,Crocodylus_siamensis,Gavialis_gangeticus,Mecistops_cataphractus,Melanosuchus_niger,Ornithos…	0
596	23	143.531	374	41.5556	2.27237	1.01584	1	3.77202	0.000916	0.00074	0.000767	0.001077	0.098792	0.104785	0.105567	0.040572	0.131419	0.106165	0.110088	0.154652	Alligator_mississippiensis,Alligator_sinensis,Caiman_crocodilus,Caiman_latirostris,Caiman_yacare,Crocodylus_acutus,Crocodylus_intermedius,Crocodylus_johnsoni,Crocodylus_mindorensis,Crocodylus_moreletii,Crocodylus_niloticus,Crocodylus_novaeguineae,Crocodylus_palustris,Crocodylus_porosus,Crocodylus_rhombifer,Crocodylus_siamensis,Gavialis_gangeticus,Mecistops_cataphractus,Melanosuchus_niger,Osteolae…	0
597	15	50.6694	376	41.7778	2.59508	0.938298	1	8.46631	0.000944	0.000717	0.000767	0.001461	0.034876	0.036991	0.037267	0.014323	0.047856	0.036343	0.038863	0.074032	Crocodylus_acutus,Crocodylus_intermedius,Crocodylus_johnsoni,Crocodylus_mindorensis,Crocodylus_moreletii,Crocodylus_niloticus,Crocodylus_novaeguineae,Crocodylus_palustris,Crocodylus_porosus,Crocodylus_rhombifer,Crocodylus_siamensis,Gavialis_gangeticus,Mecistops_cataphractus,Osteolaemus_tetraspis,Tomistoma_schlegelii	0
598	2	23.4527	400	44.4444	3.3508	0.89806	1	19.1403	0.001174	0.000727	0.000781	0.002517	0.016142	0.017122	0.017249	0.006629	0.027539	0.017039	0.018306	0.059021	Gavialis_gangeticus,Tomistoma_schlegelii	0
599	1	19.2469	386	42.8889	2.513	0.952455	1	5.13296	0.00103	0.000728	0.000775	0.001678	0.013248	0.014051	0.014156	0.005441	0.019821	0.014004	0.014926	0.032303	Tomistoma_schlegelii	0
600	1	19.2469	400	44.4444	2.91913	1.08428	1	11.6199	0.001136	0.000724	0.000782	0.001654	0.013248	0.014051	0.014156	0.005441	0.021871	0.013931	0.015041	0.031834	Gavialis_gangeticus	0
601	13	17.6475	387	43	2.67265	0.956934	1	6.28169	0.001038	0.000742	0.000775	0.00155	0.012147	0.012884	0.01298	0.004988	0.018313	0.013095	0.013686	0.027355	Crocodylus_acutus,Crocodylus_intermedius,Crocodylus_johnsoni,Crocodylus_mindorensis,Crocodylus_moreletii,Crocodylus_niloticus,Crocodylus_novaeguineae,Crocodylus_palustris,Crocodylus_porosus,Crocodylus_rhombifer,Crocodylus_siamensis,Mecistops_cataphractus,Osteolaemus_tetraspis	0
602	11	12.1521	392	43.5556	2.20496	0.988387	1	3.52933	0.000912	0.000736	0.000767	0.001357	0.008364	0.008872	0.008938	0.003435	0.011079	0.00895	0.009321	0.016485	Crocodylus_acutus,Crocodylus_intermedius,Crocodylus_johnsoni,Crocodylus_mindorensis,Crocodylus_moreletii,Crocodylus_niloticus,Crocodylus_novaeguineae,Crocodylus_palustris,Crocodylus_porosus,Crocodylus_rhombifer,Crocodylus_siamensis	0
603	8	1e-05	401	44.5556	2.77146	0.951367	1	7.10901	0.001077	0.000749	0.000769	0.001846	0	0	0	0	0	0	0	0	Crocodylus_acutus,Crocodylus_intermedius,Crocodylus_moreletii,Crocodylus_niloticus,Crocodylus_palustris,Crocodylus_porosus,Crocodylus_rhombifer,Crocodylus_siamensis	0
604	5	6.0807	401	44.5556	2.51099	0.98325	1	6.10676	0.000921	0.000741	0.000774	0.000996	0.004185	0.004439	0.004472	0.001719	0.005599	0.004506	0.004705	0.006053	Crocodylus_acutus,Crocodylus_intermedius,Crocodylus_moreletii,Crocodylus_niloticus,Crocodylus_rhombifer	0
605	4	2.74364	418	46.4444	2.80512	1.02837	1	6.16372	0.00109	0.000739	0.000795	0.001544	0.001888	0.002003	0.002018	0.000776	0.002991	0.002026	0.002181	0.004236	Crocodylus_acutus,Crocodylus_intermedius,Crocodylus_moreletii,Crocodylus_rhombifer	0
606	2	0.65866	434	48.2222	2.79696	1.01965	1	5.74981	0.001153	0.000737	0.000797	0.001795	0.000453	0.000481	0.000484	0.000186	0.00076	0.000485	0.000525	0.001182	Crocodylus_moreletii,Crocodylus_rhombifer	0
607	1	3.417	436	48.4444	2.84327	1.01216	1	5.95678	0.001147	0.000741	0.000797	0.001676	0.002352	0.002495	0.002513	0.000966	0.003918	0.002532	0.002723	0.005727	Crocodylus_moreletii	0
608	1	3.417	429	47.6667	2.80423	1.0436	1	6.4166	0.0011	0.000739	0.000794	0.001481	0.002352	0.002495	0.002513	0.000966	0.003759	0.002525	0.002713	0.005059	Crocodylus_rhombifer	0
609	2	2.28676	440	48.8889	3.07227	1.01746	1	9.14546	0.001195	0.000759	0.000808	0.001756	0.001574	0.001669	0.001682	0.000646	0.002732	0.001735	0.001848	0.004016	Crocodylus_acutus,Crocodylus_intermedius	0
610	1	1.7889	459	51	4.01747	0.987379	1	13.1242	0.001454	0.000764	0.00083	0.002303	0.001231	0.001306	0.001316	0.000506	0.0026	0.001367	0.001484	0.00412	Crocodylus_acutus	0
611	1	1.7889	459	51	3.98578	0.860129	1	13.555	0.001511	0.000753	0.000824	0.00264	0.001231	0.001306	0.001316	0.000506	0.002703	0.001346	0.001475	0.004723	Crocodylus_intermedius	0
612	1	6.8193	404	44.8889	2.41084	0.994259	1	4.35879	0.000949	0.000737	0.000774	0.001013	0.004694	0.004978	0.005016	0.001928	0.006473	0.005023	0.00528	0.00691	Crocodylus_niloticus	0
613	3	4.0754	404	44.8889	2.70116	0.973209	1	10.3758	0.001004	0.00072	0.000774	0.001441	0.002805	0.002975	0.002997	0.001152	0.004092	0.002935	0.003154	0.005872	Crocodylus_palustris,Crocodylus_porosus,Crocodylus_siamensis	0
614	2	2.8766	417	46.3333	2.69724	1.02389	1	10.813	0.000972	0.000741	0.000767	0.001458	0.00198	0.0021	0.002116	0.000813	0.002796	0.002131	0.002208	0.004195	Crocodylus_palustris,Crocodylus_siamensis	0
615	1	5.948	410	45.5556	2.69127	1.03252	1	11.1961	0.000916	0.000741	0.000769	0.001042	0.004094	0.004342	0.004375	0.001681	0.005446	0.004405	0.004573	0.006199	Crocodylus_siamensis	0
616	1	5.948	411	45.6667	2.65982	1.02752	1	10.9729	0.0009	0.00074	0.000768	0.000879	0.004094	0.004342	0.004375	0.001681	0.005353	0.004401	0.004569	0.005228	Crocodylus_palustris	0
617	1	8.8246	399	44.3333	2.22358	0.978656	1	4.40986	0.000835	0.000735	0.000765	0.000516	0.006074	0.006442	0.00649	0.002494	0.007371	0.006486	0.00675	0.004556	Crocodylus_porosus	0
618	3	2.8409	408	45.3333	2.37033	1.01959	1	4.18314	0.000968	0.000726	0.000769	0.001266	0.001955	0.002074	0.002089	0.000803	0.002751	0.002062	0.002185	0.003597	Crocodylus_johnsoni,Crocodylus_mindorensis,Crocodylus_novaeguineae	0
619	2	5.5312	408	45.3333	2.3468	0.963474	1	4.64793	0.000948	0.00073	0.000765	0.001277	0.003807	0.004038	0.004068	0.001564	0.005243	0.004039	0.004234	0.007061	Crocodylus_mindorensis,Crocodylus_novaeguineae	0
620	1	4.5279	403	44.7778	2.57888	1.01012	1	6.07772	0.00104	0.000749	0.000768	0.002279	0.003117	0.003306	0.00333	0.00128	0.004708	0.00339	0.003478	0.010317	Crocodylus_novaeguineae	0
621	1	4.5279	402	44.6667	2.38949	1.01835	1	4.82258	0.000953	0.00072	0.000769	0.001631	0.003117	0.003306	0.00333	0.00128	0.004314	0.003258	0.003482	0.007387	Crocodylus_mindorensis	0
622	1	10.0591	397	44.1111	2.242	0.987258	1	3.70185	0.00089	0.000732	0.000767	0.000919	0.006924	0.007344	0.007398	0.002843	0.008952	0.007361	0.007715	0.009249	Crocodylus_johnsoni	0
623	2	7.3464	415	46.1111	2.95264	0.910995	1	8.37699	0.001167	0.000729	0.000796	0.001796	0.005057	0.005363	0.005403	0.002077	0.008574	0.005359	0.005847	0.013194	Mecistops_cataphractus,Osteolaemus_tetraspis	0
624	1	17.7057	437	48.5556	4.23774	1.11484	1	13.7558	0.001582	0.000752	0.000834	0.0024	0.012187	0.012926	0.013023	0.005005	0.028011	0.013321	0.014767	0.042492	Osteolaemus_tetraspis	0
625	1	17.7057	420	46.6667	3.42911	1.01796	1	11.3468	0.001351	0.000763	0.000809	0.002835	0.012187	0.012926	0.013023	0.005005	0.023918	0.013515	0.014323	0.050199	Mecistops_cataphractus	0
626	8	29.2577	412	45.7778	2.18734	0.992872	1	3.54673	0.000909	0.00073	0.00075	0.001236	0.020138	0.02136	0.021519	0.00827	0.026604	0.021363	0.021932	0.036165	Alligator_mississippiensis,Alligator_sinensis,Caiman_crocodilus,Caiman_latirostris,Caiman_yacare,Melanosuchus_niger,Paleosuchus_palpebrosus,Paleosuchus_trigonatus	0
627	6	31.4254	424	47.1111	2.09665	0.990881	1	3.4627	0.000854	0.000739	0.000744	0.001072	0.02163	0.022942	0.023113	0.008883	0.026846	0.023234	0.02338	0.0337	Caiman_crocodilus,Caiman_latirostris,Caiman_yacare,Melanosuchus_niger,Paleosuchus_palpebrosus,Paleosuchus_trigonatus	0
628	2	19.4222	426	47.3333	2.28355	0.98106	1	4.24823	0.000919	0.000723	0.00075	0.001442	0.013368	0.014179	0.014285	0.00549	0.017858	0.014038	0.014567	0.028003	Paleosuchus_palpebrosus,Paleosuchus_trigonatus	0
629	1	13.2637	429	47.6667	2.22515	0.972765	1	4.11051	0.000915	0.000723	0.000746	0.001455	0.009129	0.009683	0.009755	0.003749	0.012133	0.009594	0.009898	0.019304	Paleosuchus_palpebrosus	0
630	1	13.2637	427	47.4444	2.18607	0.973151	1	4.05904	0.000894	0.000739	0.000746	0.001515	0.009129	0.009683	0.009755	0.003749	0.011863	0.009801	0.009895	0.020095	Paleosuchus_trigonatus	0
631	4	20.2577	434	48.2222	2.23735	1.00848	1	4.14402	0.000907	0.000736	0.000744	0.001245	0.013943	0.014789	0.0149	0.005726	0.018369	0.014913	0.015072	0.025225	Caiman_crocodilus,Caiman_latirostris,Caiman_yacare,Melanosuchus_niger	0
632	3	4.0929	441	49	2.98515	1.09868	1	12.6628	0.001047	0.000738	0.00075	0.00259	0.002817	0.002988	0.00301	0.001157	0.004284	0.00302	0.00307	0.010602	Caiman_crocodilus,Caiman_latirostris,Caiman_yacare	0
633	1	8.3354	436	48.4444	2.67557	0.552926	1	11.4782	0.000975	0.000727	0.000744	0.00196	0.005737	0.006085	0.006131	0.002356	0.008131	0.006059	0.006202	0.016341	Caiman_latirostris	0
634	2	5.052	441	49	2.86542	1.09868	1	12.1244	0.00099	0.000723	0.000748	0.001975	0.003477	0.003688	0.003716	0.001428	0.005003	0.003651	0.003778	0.009977	Caiman_crocodilus,Caiman_yacare	0
635	1	3.2834	452	50.2222	2.88408	1.05883	1	11.9638	0.001039	0.000724	0.000751	0.002058	0.00226	0.002397	0.002415	0.000928	0.003411	0.002376	0.002467	0.006758	Caiman_crocodilus	0
636	1	3.2834	453	50.3333	2.94939	1.05427	1	12.2184	0.001044	0.000727	0.00075	0.002139	0.00226	0.002397	0.002415	0.000928	0.003428	0.002387	0.002461	0.007022	Caiman_yacare	0
637	1	12.4283	432	48	2.47644	1.06993	1	8.92851	0.000869	0.000725	0.000743	0.00108	0.008554	0.009073	0.009141	0.003513	0.010799	0.009006	0.009234	0.013429	Melanosuchus_niger	0
638	2	11.0927	419	46.5556	3.14267	0.351249	1	17.2801	0.001044	0.000726	0.000754	0.002302	0.007635	0.008098	0.008159	0.003136	0.011582	0.008058	0.00836	0.025537	Alligator_mississippiensis,Alligator_sinensis	0
639	1	53.0186	410	45.5556	2.1522	1.00714	1	3.8017	0.000847	0.000735	0.000751	0.001013	0.036493	0.038706	0.038995	0.014987	0.044914	0.038991	0.03979	0.053719	Alligator_sinensis	0
640	1	53.0186	409	45.4444	2.13469	1.01191	1	3.67261	0.000827	0.000736	0.000748	0.000708	0.036493	0.038706	0.038995	0.014987	0.043845	0.039031	0.039645	0.037544	Alligator_mississippiensis	0
641	2	19.5	548	60.8889	11.2911	1.54492	3.24953	41.9518	0.003644	0.000902	0.001608	0.006801	0.013422	0.014236	0.014342	0.005512	0.071052	0.017583	0.031357	0.132619	Ornithosuchus_woodwardi,Riojasuchus_tenuisceps	0
642	1	8.9	666	74	15.6316	2.26912	5.64434	45.6887	0.005895	0.001206	0.00325	0.008941	0.006126	0.006497	0.006546	0.002516	0.052465	0.010736	0.028921	0.079578	Ornithosuchus_woodwardi	0
643	1	19.5	662	73.5556	14.9033	1.53772	5.31226	45.8087	0.005202	0.001128	0.003126	0.007467	0.013422	0.014236	0.014342	0.005512	0.101447	0.02199	0.060965	0.145609	Riojasuchus_tenuisceps	0
644	1	15.5	382	42.4444	4.33809	1.0549	1	8.5406	0.001782	0.000785	0.000895	0.002797	0.010669	0.011316	0.0114	0.004381	0.027626	0.012169	0.013865	0.043352	Parasuchus_hislopi	0
645	73	1.33686	527	58.5556	5.97874	1.13291	2.82617	12.9634	0.002572	0.000817	0.001265	0.0049	0.00092	0.000976	0.000983	0.000378	0.003438	0.001092	0.001692	0.006551	Accipiter_cooperii,Accipiter_striatus,Allosaurus_fragilis,Amadina_erythrocephala,Amadina_fasciata,Archaeopteryx_lithographica,Branta_canadensis,Buteo_buteo,Cactospiza_pallida,Camarhynchus_parvulus,Camarhynchus_psittacula,Carduelis_chloris,Carduelis_flammea,Carduelis_sinica,Carduelis_spinus,Cariama_cristata,Carnotaurus_sastrei,Carpodacus_erythrinus,Certhidea_olivacea,Coelophysis_bauri,Coelophysis_…	0
646	2	23.8	637	70.7778	13.4837	1.72102	4.30223	51.2285	0.005135	0.000944	0.002526	0.008561	0.016381	0.017375	0.017505	0.006728	0.122206	0.02246	0.060123	0.203742	Lesothosaurus_diagnosticus,Stegosaurus_stenops	0
647	1	22.4	638	70.8889	12.8468	1.73896	4.26983	47.1184	0.005178	0.000961	0.002534	0.009866	0.015418	0.016353	0.016475	0.006332	0.115995	0.021516	0.056756	0.220993	Lesothosaurus_diagnosticus	0
648	1	68.2	892	99.1111	34.1968	6.59269	13.6897	85.0461	0.01273	0.003925	0.008749	0.014392	0.046942	0.04979	0.050161	0.019278	0.8682	0.26767	0.596679	0.981528	Stegosaurus_stenops	1
649	71	2e-06	570	63.3333	5.51759	1.05293	3.11039	9.43697	0.002393	0.000842	0.001821	0.003436	0	0	0	0	0	0	0	0	Accipiter_cooperii,Accipiter_striatus,Allosaurus_fragilis,Amadina_erythrocephala,Amadina_fasciata,Archaeopteryx_lithographica,Branta_canadensis,Buteo_buteo,Cactospiza_pallida,Camarhynchus_parvulus,Camarhynchus_psittacula,Carduelis_chloris,Carduelis_flammea,Carduelis_sinica,Carduelis_spinus,Cariama_cristata,Carnotaurus_sastrei,Carpodacus_erythrinus,Certhidea_olivacea,Coelophysis_bauri,Coelophysis_…	0
650	1	35.7	900	100	80.2446	23.2218	34.8577	158.122	0.031002	0.018188	0.024529	0.025376	0.024572	0.026063	0.026257	0.010091	1.10676	0.649312	0.875681	0.905915	Plateosaurus_engelhardti	1
651	70	2e-06	583	64.7778	6.58258	0.992197	3.11093	15.0352	0.002994	0.000873	0.001914	0.008767	0	0	0	0	0	0	0	0	Accipiter_cooperii,Accipiter_striatus,Allosaurus_fragilis,Amadina_erythrocephala,Amadina_fasciata,Archaeopteryx_lithographica,Branta_canadensis,Buteo_buteo,Cactospiza_pallida,Camarhynchus_parvulus,Camarhynchus_psittacula,Carduelis_chloris,Carduelis_flammea,Carduelis_sinica,Carduelis_spinus,Cariama_cristata,Carnotaurus_sastrei,Carpodacus_erythrinus,Certhidea_olivacea,Coelophysis_bauri,Coelophysis_…	0
652	1	8.6	585	65	7.13492	0.953207	3.15012	27.0943	0.002789	0.000869	0.001929	0.005138	0.005919	0.006278	0.006325	0.002431	0.023986	0.007476	0.016592	0.044185	Herrerasaurus_ischigualastensis	0
653	69	4.3	607	67.4444	6.3858	1.17461	3.12734	18.2732	0.002494	0.0008	0.002046	0.003785	0.00296	0.003139	0.003163	0.001215	0.010723	0.003442	0.008798	0.016276	Accipiter_cooperii,Accipiter_striatus,Allosaurus_fragilis,Amadina_erythrocephala,Amadina_fasciata,Archaeopteryx_lithographica,Branta_canadensis,Buteo_buteo,Cactospiza_pallida,Camarhynchus_parvulus,Camarhynchus_psittacula,Carduelis_chloris,Carduelis_flammea,Carduelis_sinica,Carduelis_spinus,Cariama_cristata,Carnotaurus_sastrei,Carpodacus_erythrinus,Certhidea_olivacea,Coelophysis_bauri,Coelophysis_…	0
654	2	2.15	611	67.8889	6.07542	1.0967	3.15648	11.8002	0.002733	0.00079	0.002041	0.006211	0.00148	0.00157	0.001581	0.000608	0.005875	0.0017	0.004389	0.013354	Coelophysis_bauri,Coelophysis_rhodesiensis	0
655	1	29.25	607	67.4444	5.88679	1.23164	3.12066	19.7927	0.002409	0.000874	0.001942	0.004127	0.020133	0.021354	0.021513	0.008268	0.070463	0.025561	0.056795	0.120729	Coelophysis_bauri	0
656	1	39.75	602	66.8889	5.34766	1.03891	3.09387	9.42286	0.002253	0.000822	0.001933	0.003381	0.02736	0.02902	0.029236	0.011236	0.089569	0.032684	0.076848	0.134382	Coelophysis_rhodesiensis	0
657	67	17.85	638	70.8889	6.96198	1.38097	3.29097	34.903	0.00248	0.000837	0.002157	0.003625	0.012286	0.013031	0.013129	0.005046	0.04427	0.014942	0.038499	0.064705	Accipiter_cooperii,Accipiter_striatus,Allosaurus_fragilis,Amadina_erythrocephala,Amadina_fasciata,Archaeopteryx_lithographica,Branta_canadensis,Buteo_buteo,Cactospiza_pallida,Camarhynchus_parvulus,Camarhynchus_psittacula,Carduelis_chloris,Carduelis_flammea,Carduelis_sinica,Carduelis_spinus,Cariama_cristata,Carnotaurus_sastrei,Carpodacus_erythrinus,Certhidea_olivacea,Daspletosaurus_torosus,Dromaeo…	0
658	2	77.55	648	72	5.77507	1.17805	3.29097	11.7118	0.002371	0.00084	0.00215	0.002932	0.053377	0.056616	0.057038	0.021921	0.183885	0.065164	0.166725	0.227362	Carnotaurus_sastrei,Majungasaurus_crenatissimus	0
659	1	71.3	645	71.6667	6.23831	1.17971	3.28668	16.3866	0.002499	0.000797	0.002127	0.004031	0.049076	0.052053	0.052441	0.020155	0.178203	0.056813	0.151662	0.287404	Majungasaurus_crenatissimus	0
660	1	65.2	646	71.7778	6.0912	1.0763	3.26508	13.7519	0.002439	0.000864	0.002121	0.003723	0.044877	0.047599	0.047955	0.01843	0.159043	0.056301	0.138258	0.242772	Carnotaurus_sastrei	0
661	65	24.43	671	74.5556	5.88728	1.20239	3.34679	9.70974	0.002399	0.000841	0.002288	0.002554	0.016815	0.017835	0.017968	0.006906	0.058615	0.020541	0.055903	0.062383	Accipiter_cooperii,Accipiter_striatus,Allosaurus_fragilis,Amadina_erythrocephala,Amadina_fasciata,Archaeopteryx_lithographica,Branta_canadensis,Buteo_buteo,Cactospiza_pallida,Camarhynchus_parvulus,Camarhynchus_psittacula,Carduelis_chloris,Carduelis_flammea,Carduelis_sinica,Carduelis_spinus,Cariama_cristata,Carpodacus_erythrinus,Certhidea_olivacea,Daspletosaurus_torosus,Dromaeosaurus_albertensis,D…	0
662	2	4.08	676	75.1111	7.09218	1.22168	3.39137	16.6991	0.002924	0.000855	0.002302	0.004747	0.002808	0.002979	0.003001	0.001153	0.01193	0.00349	0.009392	0.019367	Allosaurus_fragilis,Sinraptor_dongi	0
663	1	29.04	670	74.4444	6.09692	1.17002	3.33473	12.1317	0.002466	0.000828	0.002247	0.00367	0.019988	0.021201	0.021359	0.008209	0.071617	0.024043	0.065254	0.106589	Sinraptor_dongi	0
664	1	41.34	669	74.3333	5.73529	1.19417	3.34568	9.15829	0.002399	0.000826	0.002247	0.002571	0.028454	0.03018	0.030406	0.011686	0.099161	0.034143	0.092893	0.106271	Allosaurus_fragilis	0
665	63	17.77	766	85.1111	10.5993	3.73	3.69645	41.5569	0.004088	0.00248	0.002585	0.00927	0.012231	0.012973	0.01307	0.005023	0.072639	0.044076	0.045941	0.164732	Accipiter_cooperii,Accipiter_striatus,Amadina_erythrocephala,Amadina_fasciata,Archaeopteryx_lithographica,Branta_canadensis,Buteo_buteo,Cactospiza_pallida,Camarhynchus_parvulus,Camarhynchus_psittacula,Carduelis_chloris,Carduelis_flammea,Carduelis_sinica,Carduelis_spinus,Cariama_cristata,Carpodacus_erythrinus,Certhidea_olivacea,Daspletosaurus_torosus,Dromaeosaurus_albertensis,Dromaius_novaeholland…	0
666	4	65.3278	764	84.8889	8.08237	3.71746	3.62318	25.2949	0.002922	0.002546	0.002557	0.004207	0.044965	0.047693	0.048049	0.018466	0.190855	0.16635	0.167017	0.274854	Daspletosaurus_torosus,Gorgosaurus_libratus,Tarbosaurus_bataar,Tyrannosaurus_rex	0
667	1	35.2222	766	85.1111	7.21246	3.35365	3.6194	16.6938	0.002716	0.002555	0.002547	0.002709	0.024243	0.025714	0.025906	0.009956	0.095658	0.090001	0.0897	0.09543	Gorgosaurus_libratus	0
668	3	14.2333	766	85.1111	8.77635	3.72786	3.6714	44.4419	0.003047	0.002574	0.002573	0.004713	0.009797	0.010391	0.010469	0.004023	0.043368	0.036638	0.036617	0.067081	Daspletosaurus_torosus,Tarbosaurus_bataar,Tyrannosaurus_rex	0
669	1	20.9889	766	85.1111	7.44304	3.53149	3.66545	15.1204	0.002882	0.002559	0.002579	0.003019	0.014447	0.015323	0.015437	0.005933	0.060498	0.053715	0.054141	0.063356	Daspletosaurus_torosus	0
670	2	4.74444	774	86	9.31848	3.69148	3.76828	30.8363	0.003713	0.002612	0.002623	0.007483	0.003266	0.003464	0.00349	0.001341	0.017614	0.012391	0.012443	0.0355	Tarbosaurus_bataar,Tyrannosaurus_rex	0
671	1	22.3444	773	85.8889	7.10442	3.26605	3.62801	14.0962	0.002804	0.002551	0.002566	0.002556	0.01538	0.016313	0.016434	0.006316	0.062643	0.057011	0.05734	0.057118	Tarbosaurus_bataar	0
672	1	22.3444	770	85.5556	7.11631	3.5318	3.66545	14.0958	0.00281	0.002574	0.002573	0.002533	0.01538	0.016313	0.016434	0.006316	0.062798	0.057505	0.057484	0.056607	Tyrannosaurus_rex	0
673	59	2.9	879	97.6667	19.4289	3.71114	4.28278	97.041	0.007038	0.002563	0.00293	0.016533	0.001996	0.002117	0.002133	0.00082	0.020411	0.007433	0.008498	0.047946	Accipiter_cooperii,Accipiter_striatus,Amadina_erythrocephala,Amadina_fasciata,Archaeopteryx_lithographica,Branta_canadensis,Buteo_buteo,Cactospiza_pallida,Camarhynchus_parvulus,Camarhynchus_psittacula,Carduelis_chloris,Carduelis_flammea,Carduelis_sinica,Carduelis_spinus,Cariama_cristata,Carpodacus_erythrinus,Certhidea_olivacea,Dromaeosaurus_albertensis,Dromaius_novaehollandiae,Eophona_migratoria,…	1
674	1	79.95	891	99	10.087	3.49049	4.24829	22.3991	0.004036	0.002567	0.002925	0.005037	0.055029	0.058368	0.058803	0.0226	0.322685	0.205253	0.233855	0.402704	Erlikosaurus_andrewsi	1
675	58	1.81	888	98.6667	11.69	3.94108	4.11474	44.3329	0.004232	0.002574	0.002845	0.007289	0.001246	0.001321	0.001331	0.000512	0.007659	0.004659	0.005149	0.013193	Accipiter_cooperii,Accipiter_striatus,Amadina_erythrocephala,Amadina_fasciata,Archaeopteryx_lithographica,Branta_canadensis,Buteo_buteo,Cactospiza_pallida,Camarhynchus_parvulus,Camarhynchus_psittacula,Carduelis_chloris,Carduelis_flammea,Carduelis_sinica,Carduelis_spinus,Cariama_cristata,Carpodacus_erythrinus,Certhidea_olivacea,Dromaeosaurus_albertensis,Dromaius_novaehollandiae,Eophona_migratoria,…	1
676	1	95.84	888	98.6667	9.75082	3.36763	4.14435	20.0453	0.00375	0.002614	0.002864	0.004378	0.065966	0.069968	0.07049	0.027091	0.359439	0.250503	0.274509	0.419611	Dromaeosaurus_albertensis	1
677	57	7.92	896	99.5556	28.4549	2.96563	4.52654	151.004	0.009771	0.002694	0.003068	0.019526	0.005451	0.005782	0.005825	0.002239	0.077385	0.02134	0.024299	0.154643	Accipiter_cooperii,Accipiter_striatus,Amadina_erythrocephala,Amadina_fasciata,Archaeopteryx_lithographica,Branta_canadensis,Buteo_buteo,Cactospiza_pallida,Camarhynchus_parvulus,Camarhynchus_psittacula,Carduelis_chloris,Carduelis_flammea,Carduelis_sinica,Carduelis_spinus,Cariama_cristata,Carpodacus_erythrinus,Certhidea_olivacea,Dromaius_novaehollandiae,Eophona_migratoria,Erythrura_gouldiae,Erythru…	1
678	1	12.32	892	99.1111	14.733	3.46256	4.30137	40.0119	0.00651	0.002555	0.00296	0.013305	0.00848	0.008994	0.009061	0.003483	0.080203	0.031472	0.036464	0.163917	Archaeopteryx_lithographica	1
679	56	42.5567	894	99.3333	9.15122	3.7281	3.97829	28.3322	0.003364	0.00262	0.002804	0.004335	0.029292	0.031069	0.0313	0.01203	0.143174	0.111486	0.119336	0.184469	Accipiter_cooperii,Accipiter_striatus,Amadina_erythrocephala,Amadina_fasciata,Branta_canadensis,Buteo_buteo,Cactospiza_pallida,Camarhynchus_parvulus,Camarhynchus_psittacula,Carduelis_chloris,Carduelis_flammea,Carduelis_sinica,Carduelis_spinus,Cariama_cristata,Carpodacus_erythrinus,Certhidea_olivacea,Dromaius_novaehollandiae,Eophona_migratoria,Erythrura_gouldiae,Erythrura_trichroa,Estrilda_troglod…	1
680	53	15.1869	896	99.5556	9.69207	3.37797	4.03063	21.3885	0.003883	0.002594	0.002822	0.006371	0.010453	0.011087	0.01117	0.004293	0.058972	0.039401	0.042855	0.096756	Accipiter_cooperii,Accipiter_striatus,Amadina_erythrocephala,Amadina_fasciata,Branta_canadensis,Buteo_buteo,Cactospiza_pallida,Camarhynchus_parvulus,Camarhynchus_psittacula,Carduelis_chloris,Carduelis_flammea,Carduelis_sinica,Carduelis_spinus,Cariama_cristata,Carpodacus_erythrinus,Certhidea_olivacea,Eophona_migratoria,Erythrura_gouldiae,Erythrura_trichroa,Estrilda_troglodytes,Falco_columbarius,Fa…	1
681	2	18.5764	894	99.3333	8.60872	3.29865	3.95517	20.1931	0.003306	0.002625	0.002778	0.003874	0.012786	0.013562	0.013663	0.005251	0.061416	0.048761	0.051606	0.071973	Branta_canadensis,Gallus_gallus	1
682	1	83.7	894	99.3333	8.30204	3.34642	3.93949	17.5817	0.003259	0.00265	0.002768	0.004812	0.05761	0.061105	0.061561	0.02366	0.272752	0.221801	0.23165	0.402786	Branta_canadensis	1
683	1	83.7	894	99.3333	8.40236	3.46989	3.9257	19.8641	0.003178	0.002579	0.002767	0.005006	0.05761	0.061105	0.061561	0.02366	0.266027	0.215874	0.231619	0.419041	Gallus_gallus	1
684	51	14.4764	895	99.4444	11.5674	3.02963	3.99956	53.4077	0.003922	0.002618	0.002803	0.006303	0.009964	0.010569	0.010647	0.004092	0.056777	0.037902	0.04057	0.091247	Accipiter_cooperii,Accipiter_striatus,Amadina_erythrocephala,Amadina_fasciata,Buteo_buteo,Cactospiza_pallida,Camarhynchus_parvulus,Camarhynchus_psittacula,Carduelis_chloris,Carduelis_flammea,Carduelis_sinica,Carduelis_spinus,Cariama_cristata,Carpodacus_erythrinus,Certhidea_olivacea,Eophona_migratoria,Erythrura_gouldiae,Erythrura_trichroa,Estrilda_troglodytes,Falco_columbarius,Falco_mexicanus,Falc…	1
685	11	1e-05	895	99.4444	8.94512	3.44924	3.9593	16.7969	0.003642	0.002603	0.002778	0.006491	0	0	0	0	0	0	0	0	Accipiter_cooperii,Accipiter_striatus,Buteo_buteo,Cariama_cristata,Falco_columbarius,Falco_mexicanus,Falco_peregrinus,Falco_sparverius,Geranoaetus_melanoleucus,Larus_fuscus,Myiopsitta_monachus	1
686	10	1e-05	894	99.3333	8.49311	3.27995	3.90149	16.1001	0.003424	0.00257	0.002755	0.006232	0	0	0	0	0	0	0	0	Accipiter_cooperii,Accipiter_striatus,Buteo_buteo,Cariama_cristata,Falco_columbarius,Falco_mexicanus,Falco_peregrinus,Falco_sparverius,Geranoaetus_melanoleucus,Larus_fuscus	1
687	2	2.50001	894	99.3333	9.19699	3.48007	3.97852	17.5875	0.003773	0.002578	0.002773	0.006574	0.001721	0.001825	0.001839	0.000707	0.009433	0.006446	0.006934	0.016434	Cariama_cristata,Larus_fuscus	1
688	1	85.3	894	99.3333	7.88345	3.4167	3.90149	13.1519	0.003054	0.002581	0.002754	0.002662	0.058712	0.062273	0.062738	0.024112	0.260503	0.220165	0.234909	0.227073	Larus_fuscus	1
689	1	85.3	894	99.3333	8.07292	3.3263	3.84957	15.4164	0.002958	0.002593	0.002743	0.001676	0.058712	0.062273	0.062738	0.024112	0.252306	0.22115	0.233975	0.142946	Cariama_cristata	1
690	8	8.73854	895	99.4444	9.8802	3.04858	3.88299	34.0555	0.00358	0.002569	0.002756	0.007596	0.006015	0.00638	0.006427	0.00247	0.031284	0.022448	0.024083	0.06638	Accipiter_cooperii,Accipiter_striatus,Buteo_buteo,Falco_columbarius,Falco_mexicanus,Falco_peregrinus,Falco_sparverius,Geranoaetus_melanoleucus	1
691	4	68.496	894	99.3333	7.8527	3.41374	3.83255	13.815	0.003107	0.002613	0.002739	0.004536	0.047146	0.050006	0.050379	0.019362	0.212845	0.179001	0.187591	0.31073	Falco_columbarius,Falco_mexicanus,Falco_peregrinus,Falco_sparverius	1
692	3	2.87464	896	99.5556	8.32632	3.41318	3.93605	14.0799	0.003362	0.00259	0.002758	0.004418	0.001979	0.002099	0.002114	0.000813	0.009665	0.007445	0.007929	0.0127	Falco_columbarius,Falco_mexicanus,Falco_peregrinus	1
693	2	1.76813	895	99.4444	8.68217	3.45877	3.93949	15.9537	0.003541	0.002569	0.002767	0.006175	0.001217	0.001291	0.0013	0.0005	0.006262	0.004542	0.004892	0.010917	Falco_mexicanus,Falco_peregrinus	1
694	1	5.92266	895	99.4444	8.51801	3.27254	3.89087	17.3235	0.00343	0.002633	0.002753	0.008471	0.004077	0.004324	0.004356	0.001674	0.020312	0.015597	0.016303	0.05017	Falco_peregrinus	1
695	1	5.92266	895	99.4444	8.81699	3.33026	3.96579	15.4994	0.003615	0.002561	0.002775	0.005412	0.004077	0.004324	0.004356	0.001674	0.021412	0.015168	0.016437	0.032054	Falco_mexicanus	1
696	1	7.69079	895	99.4444	8.24803	3.31181	3.88551	14.9212	0.003218	0.002569	0.002758	0.003705	0.005294	0.005615	0.005657	0.002174	0.024749	0.019757	0.021212	0.028498	Falco_columbarius	1
697	1	10.5654	894	99.3333	8.15016	3.43133	3.81538	16.4907	0.003124	0.00263	0.002738	0.003299	0.007272	0.007713	0.007771	0.002987	0.033002	0.027782	0.028929	0.034856	Falco_sparverius	1
698	4	54.7615	894	99.3333	8.17894	3.40145	3.97387	13.467	0.003241	0.002583	0.002777	0.003075	0.037692	0.039979	0.040277	0.01548	0.177457	0.141446	0.15208	0.168396	Accipiter_cooperii,Accipiter_striatus,Buteo_buteo,Geranoaetus_melanoleucus	1
699	2	14.0356	894	99.3333	10.4938	3.53639	4.09493	30.9368	0.004124	0.002546	0.00283	0.006648	0.009661	0.010247	0.010323	0.003967	0.057881	0.035738	0.039727	0.093303	Buteo_buteo,Geranoaetus_melanoleucus	1
700	1	10.2644	895	99.4444	10.0909	3.39636	4.09493	20.1453	0.004012	0.002573	0.002834	0.005289	0.007065	0.007494	0.007549	0.002901	0.041179	0.026414	0.02909	0.054289	Geranoaetus_melanoleucus	1
701	1	10.2644	895	99.4444	9.62369	3.48012	4.00878	25.3941	0.003533	0.002627	0.002802	0.003896	0.007065	0.007494	0.007549	0.002901	0.036259	0.026963	0.028762	0.039985	Buteo_buteo	1
702	2	5.7058	895	99.4444	14.3272	3.23045	4.11916	55.8022	0.00515	0.002565	0.002839	0.011447	0.003927	0.004166	0.004197	0.001613	0.029387	0.014633	0.016197	0.065312	Accipiter_cooperii,Accipiter_striatus	1
703	1	18.5942	895	99.4444	8.48415	3.45234	3.94793	14.6792	0.003375	0.00255	0.002772	0.003826	0.012798	0.013575	0.013676	0.005256	0.062757	0.047419	0.051537	0.071133	Accipiter_striatus	1
704	1	18.5942	894	99.3333	9.4903	3.32659	3.94793	21.6359	0.00377	0.002614	0.002769	0.006437	0.012798	0.013575	0.013676	0.005256	0.070105	0.048602	0.051482	0.119697	Accipiter_cooperii	1
705	1	87.8	894	99.3333	9.16341	3.63437	3.99956	22.9545	0.003446	0.002572	0.002806	0.003888	0.060432	0.064099	0.064577	0.024819	0.30253	0.225827	0.246397	0.341373	Myiopsitta_monachus	1
706	40	52.7	900	100	66.6656	6.46635	31.8717	144.721	0.026614	0.004142	0.020544	0.026526	0.036273	0.038474	0.038761	0.014897	1.40254	0.218261	1.08268	1.3979	Amadina_erythrocephala,Amadina_fasciata,Cactospiza_pallida,Camarhynchus_parvulus,Camarhynchus_psittacula,Carduelis_chloris,Carduelis_flammea,Carduelis_sinica,Carduelis_spinus,Carpodacus_erythrinus,Certhidea_olivacea,Eophona_migratoria,Erythrura_gouldiae,Erythrura_trichroa,Estrilda_troglodytes,Geospiza_fortis,Geospiza_fuliginosa,Geospiza_magnirostris,Geospiza_scandens,Hypargos_niveoguttatus,Lagono…	1
707	22	1e-05	894	99.3333	9.6677	3.75394	4.04721	29.3123	0.003802	0.002542	0.002822	0.006293	0	0	0	0	0	0	0	0	Cactospiza_pallida,Camarhynchus_parvulus,Camarhynchus_psittacula,Carduelis_chloris,Carduelis_flammea,Carduelis_sinica,Carduelis_spinus,Carpodacus_erythrinus,Certhidea_olivacea,Eophona_migratoria,Geospiza_fortis,Geospiza_fuliginosa,Geospiza_magnirostris,Geospiza_scandens,Mycerobas_affinis,Padda_oryzivora,Platyspiza_crassirostris,Pyrrhula_pyrrhula,Rhodospiza_obsoleta,Serinus_leucopygius,Serinus_moz…	1
708	1	35.1	895	99.4444	8.15764	3.39436	3.97387	14.2025	0.003155	0.002628	0.0028	0.002647	0.024159	0.025625	0.025816	0.009922	0.110746	0.092242	0.098264	0.092925	Padda_oryzivora	1
709	21	10.3	894	99.3333	8.68323	3.42822	3.97978	17.4005	0.003367	0.002563	0.0028	0.00433	0.007089	0.00752	0.007576	0.002912	0.034684	0.026399	0.028839	0.044602	Cactospiza_pallida,Camarhynchus_parvulus,Camarhynchus_psittacula,Carduelis_chloris,Carduelis_flammea,Carduelis_sinica,Carduelis_spinus,Carpodacus_erythrinus,Certhidea_olivacea,Eophona_migratoria,Geospiza_fortis,Geospiza_fuliginosa,Geospiza_magnirostris,Geospiza_scandens,Mycerobas_affinis,Platyspiza_crassirostris,Pyrrhula_pyrrhula,Rhodospiza_obsoleta,Serinus_leucopygius,Serinus_mozambicus,Serinus_…	1
710	12	8.3	894	99.3333	8.55895	3.41678	4.00878	14.7446	0.0034	0.002585	0.002806	0.004163	0.005713	0.006059	0.006105	0.002346	0.028222	0.021459	0.023293	0.034554	Carduelis_chloris,Carduelis_flammea,Carduelis_sinica,Carduelis_spinus,Carpodacus_erythrinus,Eophona_migratoria,Mycerobas_affinis,Pyrrhula_pyrrhula,Rhodospiza_obsoleta,Serinus_leucopygius,Serinus_mozambicus,Serinus_sulphuratus	1
711	11	0.2	894	99.3333	11.1291	3.29394	4.03874	45.3226	0.003918	0.002591	0.002807	0.007069	0.000138	0.000146	0.000147	5.7e-05	0.000784	0.000518	0.000561	0.001414	Carduelis_chloris,Carduelis_flammea,Carduelis_sinica,Carduelis_spinus,Carpodacus_erythrinus,Eophona_migratoria,Mycerobas_affinis,Pyrrhula_pyrrhula,Serinus_leucopygius,Serinus_mozambicus,Serinus_sulphuratus	1
712	2	2.88492	894	99.3333	11.4678	3.74335	4.13586	37.7374	0.004582	0.002579	0.002838	0.008931	0.001986	0.002106	0.002122	0.000815	0.013219	0.007441	0.008187	0.025764	Eophona_migratoria,Mycerobas_affinis	1
713	1	13.4151	895	99.4444	12.9277	3.85378	4.03874	91.6752	0.003683	0.002587	0.002812	0.005701	0.009234	0.009794	0.009867	0.003792	0.049408	0.034704	0.037721	0.076482	Eophona_migratoria	1
714	1	13.4151	894	99.3333	9.79522	3.38057	3.98695	31.8094	0.0035	0.002595	0.002791	0.00418	0.009234	0.009794	0.009867	0.003792	0.046957	0.034809	0.037441	0.056074	Mycerobas_affinis	1
715	9	1.10464	895	99.4444	9.71068	3.14892	4.02575	28.2036	0.003637	0.002579	0.002822	0.004549	0.00076	0.000806	0.000812	0.000312	0.004018	0.002849	0.003117	0.005025	Carduelis_chloris,Carduelis_flammea,Carduelis_sinica,Carduelis_spinus,Carpodacus_erythrinus,Pyrrhula_pyrrhula,Serinus_leucopygius,Serinus_mozambicus,Serinus_sulphuratus	1
716	8	0.31247	894	99.3333	8.73041	3.37839	4.05842	15.1531	0.003565	0.002561	0.002824	0.005318	0.000215	0.000228	0.00023	8.8e-05	0.001114	0.0008	0.000883	0.001662	Carduelis_chloris,Carduelis_flammea,Carduelis_sinica,Carduelis_spinus,Carpodacus_erythrinus,Serinus_leucopygius,Serinus_mozambicus,Serinus_sulphuratus	1
717	7	5.73696	894	99.3333	8.36108	3.40168	4.0061	14.2487	0.003317	0.002632	0.002801	0.003994	0.003949	0.004188	0.00422	0.001622	0.019028	0.015101	0.016068	0.022912	Carduelis_chloris,Carduelis_flammea,Carduelis_sinica,Carduelis_spinus,Serinus_leucopygius,Serinus_mozambicus,Serinus_sulphuratus	1
718	5	0.38594	894	99.3333	9.32475	3.37952	4.0499	18.7394	0.003716	0.002644	0.002828	0.006215	0.000266	0.000282	0.000284	0.000109	0.001434	0.001021	0.001092	0.002399	Carduelis_flammea,Carduelis_spinus,Serinus_leucopygius,Serinus_mozambicus,Serinus_sulphuratus	1
719	4	1e-05	894	99.3333	14.1488	3.30477	4.14868	71.7601	0.005001	0.00279	0.002862	0.018202	0	0	0	0	0	0	0	0	Carduelis_flammea,Serinus_leucopygius,Serinus_mozambicus,Serinus_sulphuratus	1
720	1	8.76	894	99.3333	9.17196	3.47027	4.1029	20.4175	0.003559	0.002633	0.002839	0.004408	0.006029	0.006395	0.006443	0.002476	0.031176	0.023061	0.024868	0.038613	Carduelis_flammea	1
721	3	0.11	894	99.3333	12.9751	3.15891	4.38635	46.2116	0.005212	0.002527	0.002963	0.010299	7.6e-05	8e-05	8.1e-05	3.1e-05	0.000573	0.000278	0.000326	0.001133	Serinus_leucopygius,Serinus_mozambicus,Serinus_sulphuratus	1
722	2	0.460655	895	99.4444	14.7554	3.63197	4.51198	38.3996	0.005752	0.002596	0.00304	0.011003	0.000317	0.000336	0.000339	0.00013	0.00265	0.001196	0.0014	0.005069	Serinus_mozambicus,Serinus_sulphuratus	1
723	1	8.18934	895	99.4444	13.8905	3.72337	4.39498	37.6455	0.005192	0.002612	0.002992	0.009975	0.005637	0.005979	0.006023	0.002315	0.042522	0.021393	0.0245	0.081687	Serinus_mozambicus	1
724	1	8.18934	897	99.6667	18.7925	3.78019	4.79499	50.4846	0.006956	0.002789	0.003241	0.012204	0.005637	0.005979	0.006023	0.002315	0.056965	0.022838	0.02654	0.099941	Serinus_sulphuratus	1
725	1	8.65	894	99.3333	11.9954	2.8946	4.27907	56.682	0.004345	0.002626	0.002925	0.007187	0.005954	0.006315	0.006362	0.002445	0.037585	0.022719	0.025299	0.062171	Serinus_leucopygius	1
726	1	8.76	896	99.5556	9.23102	3.52486	4.04822	20.9615	0.003511	0.002602	0.002809	0.005226	0.006029	0.006395	0.006443	0.002476	0.030752	0.022796	0.024607	0.045782	Carduelis_spinus	1
727	2	6.56234	895	99.4444	9.18064	3.3299	4.04721	18.1058	0.003722	0.00254	0.002812	0.006629	0.004517	0.004791	0.004827	0.001855	0.024426	0.016668	0.018452	0.0435	Carduelis_chloris,Carduelis_sinica	1
728	1	2.5836	895	99.4444	9.41029	3.6475	4.02954	26.1368	0.003412	0.002564	0.002818	0.003775	0.001778	0.001886	0.0019	0.00073	0.008816	0.006625	0.007281	0.009752	Carduelis_sinica	1
729	1	2.5836	895	99.4444	10.347	3.49491	4.05345	30.9892	0.00396	0.002597	0.002828	0.006579	0.001778	0.001886	0.0019	0.00073	0.010232	0.006709	0.007307	0.016997	Carduelis_chloris	1
730	1	14.8829	894	99.3333	8.13578	3.44946	3.97904	14.8799	0.003085	0.00259	0.002796	0.002126	0.010244	0.010865	0.010946	0.004207	0.045921	0.038546	0.041615	0.031644	Carpodacus_erythrinus	1
731	1	15.1954	894	99.3333	8.97455	3.46305	3.96175	28.4361	0.003166	0.002608	0.0028	0.002579	0.010459	0.011093	0.011176	0.004295	0.048113	0.039629	0.04254	0.039183	Pyrrhula_pyrrhula	1
732	1	16.5	894	99.3333	9.68422	3.24937	4.0061	48.5098	0.003286	0.002631	0.002807	0.003887	0.011357	0.012046	0.012136	0.004664	0.054214	0.043408	0.046322	0.064142	Rhodospiza_obsoleta	1
733	9	2.8	900	100	126.818	45.271	56.0514	301.888	0.047732	0.036711	0.040689	0.069905	0.001927	0.002044	0.002059	0.000791	0.133648	0.102792	0.113928	0.195734	Cactospiza_pallida,Camarhynchus_parvulus,Camarhynchus_psittacula,Certhidea_olivacea,Geospiza_fortis,Geospiza_fuliginosa,Geospiza_magnirostris,Geospiza_scandens,Platyspiza_crassirostris	1
734	2	20.536	900	100	176.467	53.0288	63.5427	555.94	0.065324	0.042632	0.044786	0.104318	0.014135	0.014992	0.015104	0.005805	1.3415	0.875489	0.919721	2.14228	Cactospiza_pallida,Platyspiza_crassirostris	1
735	1	1.464	900	100	308.736	58.8133	80.7063	1002.1	0.10622	0.041484	0.052349	0.165331	0.001008	0.001069	0.001077	0.000414	0.155506	0.060733	0.076639	0.242045	Cactospiza_pallida	1
736	1	1.464	900	100	256.995	59.0472	72.4795	868.582	0.093258	0.042087	0.049166	0.146942	0.001008	0.001069	0.001077	0.000414	0.13653	0.061615	0.071979	0.215123	Platyspiza_crassirostris	1
737	7	13.5089	900	100	128.902	45.4004	58.7795	235.289	0.051661	0.033387	0.041447	0.07233	0.009298	0.009862	0.009936	0.003819	0.697889	0.451016	0.55991	0.977102	Camarhynchus_parvulus,Camarhynchus_psittacula,Certhidea_olivacea,Geospiza_fortis,Geospiza_fuliginosa,Geospiza_magnirostris,Geospiza_scandens	1
738	3	6.31493	900	100	133.535	45.2753	58.6223	241.33	0.051282	0.032715	0.042434	0.054425	0.004347	0.00461	0.004645	0.001785	0.323843	0.206591	0.267971	0.34369	Camarhynchus_parvulus,Camarhynchus_psittacula,Certhidea_olivacea	1
739	2	1.8452	900	100	161.776	45.2824	59.8344	345.061	0.063997	0.032593	0.042871	0.107699	0.00127	0.001347	0.001357	0.000522	0.118088	0.060141	0.079106	0.198725	Camarhynchus_parvulus,Camarhynchus_psittacula	1
740	1	0.330947	900	100	162.395	46.8351	62.6575	328.689	0.064953	0.033157	0.04457	0.097165	0.000228	0.000242	0.000243	9.4e-05	0.021496	0.010973	0.01475	0.032156	Camarhynchus_psittacula	1
741	1	0.330947	900	100	172.051	49.6038	59.8615	502.532	0.063549	0.032233	0.043041	0.12465	0.000228	0.000242	0.000243	9.4e-05	0.021031	0.010667	0.014244	0.041252	Camarhynchus_parvulus	1
742	1	2.17615	900	100	159.13	47.9054	60.0769	399.964	0.060898	0.033078	0.043227	0.106232	0.001498	0.001589	0.001601	0.000615	0.132523	0.071983	0.094069	0.231176	Certhidea_olivacea	1
743	4	1e-05	900	100	200.422	51.1078	63.3809	588.986	0.076809	0.032061	0.04457	0.134644	0	0	0	0	1e-06	0	0	1e-06	Geospiza_fortis,Geospiza_fuliginosa,Geospiza_magnirostris,Geospiza_scandens	1
744	1	8.49107	900	100	179.675	41.0201	62.7554	525.003	0.071406	0.032267	0.04402	0.130713	0.005844	0.006199	0.006245	0.0024	0.606313	0.273978	0.373777	1.1099	Geospiza_fortis	1
745	3	7.95842	900	100	337.53	47.018	78.1101	1072.39	0.132593	0.041488	0.05038	0.296226	0.005478	0.00581	0.005853	0.00225	1.05523	0.330175	0.400942	2.35749	Geospiza_fuliginosa,Geospiza_magnirostris,Geospiza_scandens	1
746	2	0.188379	900	100	898.338	80.5669	281.458	2481.06	0.415216	0.051696	0.117895	1.33888	0.00013	0.000138	0.000139	5.3e-05	0.078218	0.009739	0.022209	0.252217	Geospiza_magnirostris,Geospiza_scandens	1
747	1	0.344278	900	100	796.171	77.8823	296.845	1913.77	0.31864	0.053044	0.131131	0.46758	0.000237	0.000251	0.000253	9.7e-05	0.109701	0.018262	0.045146	0.160977	Geospiza_scandens	1
748	1	0.344278	900	100	2104.48	617.819	882.344	4705.55	0.800092	0.454559	0.596815	0.887137	0.000237	0.000251	0.000253	9.7e-05	0.275454	0.156495	0.20547	0.305422	Geospiza_magnirostris	1
749	1	0.532657	900	100	402.036	65.6161	78.7896	1594.68	0.139338	0.037515	0.050408	0.293189	0.000367	0.000389	0.000392	0.000151	0.074219	0.019983	0.02685	0.156169	Geospiza_fuliginosa	1
750	18	20.9635	894	99.3333	8.21985	3.36211	3.92955	15.1735	0.00315	0.002565	0.002781	0.003624	0.014429	0.015304	0.015419	0.005926	0.066041	0.053764	0.058295	0.075977	Amadina_erythrocephala,Amadina_fasciata,Erythrura_gouldiae,Erythrura_trichroa,Estrilda_troglodytes,Hypargos_niveoguttatus,Lagonosticta_senegala,Lonchura_fringilloides,Lonchura_pallida,Lonchura_punctulata,Neochmia_modesta,Neochmia_ruficauda,Poephila_acuticauda,Poephila_cincta,Pytilia_hypogrammica,Taeniopygia_bichenovii,Taeniopygia_guttata,Uraeginthus_bengalus	1
751	9	1.95765	895	99.4444	8.56184	3.41479	3.97978	15.1312	0.003375	0.002605	0.002814	0.004651	0.001347	0.001429	0.00144	0.000553	0.006608	0.005099	0.00551	0.009104	Amadina_erythrocephala,Amadina_fasciata,Erythrura_gouldiae,Erythrura_trichroa,Estrilda_troglodytes,Hypargos_niveoguttatus,Lagonosticta_senegala,Pytilia_hypogrammica,Uraeginthus_bengalus	1
752	7	0.926697	894	99.3333	8.75345	3.39571	4.03435	15.0301	0.003545	0.002606	0.002833	0.004334	0.000638	0.000677	0.000682	0.000262	0.003285	0.002415	0.002625	0.004017	Amadina_erythrocephala,Amadina_fasciata,Estrilda_troglodytes,Hypargos_niveoguttatus,Lagonosticta_senegala,Pytilia_hypogrammica,Uraeginthus_bengalus	1
753	6	0.357197	895	99.4444	9.36502	3.55454	4.05345	18.8762	0.003821	0.002634	0.002833	0.006047	0.000246	0.000261	0.000263	0.000101	0.001365	0.000941	0.001012	0.00216	Amadina_erythrocephala,Amadina_fasciata,Hypargos_niveoguttatus,Lagonosticta_senegala,Pytilia_hypogrammica,Uraeginthus_bengalus	1
754	4	0.663287	895	99.4444	11.3229	3.16277	4.03474	64.6599	0.003789	0.002581	0.002828	0.006482	0.000457	0.000484	0.000488	0.000187	0.002513	0.001712	0.001876	0.004299	Hypargos_niveoguttatus,Lagonosticta_senegala,Pytilia_hypogrammica,Uraeginthus_bengalus	1
755	3	0.533333	895	99.4444	9.15382	3.52176	4.06754	17.6738	0.003807	0.002706	0.002845	0.006966	0.000367	0.000389	0.000392	0.000151	0.00203	0.001443	0.001517	0.003715	Hypargos_niveoguttatus,Lagonosticta_senegala,Pytilia_hypogrammica	1
756	2	0.066667	894	99.3333	10.6909	3.33399	4.05443	23.463	0.004291	0.002608	0.00285	0.007812	4.6e-05	4.9e-05	4.9e-05	1.9e-05	0.000286	0.000174	0.00019	0.000521	Lagonosticta_senegala,Pytilia_hypogrammica	1
757	1	9.63164	894	99.3333	8.73381	3.35749	3.97387	20.3404	0.003267	0.002678	0.002803	0.004623	0.006629	0.007032	0.007084	0.002723	0.031465	0.02579	0.026993	0.044527	Lagonosticta_senegala	1
758	1	9.63164	894	99.3333	8.37182	3.43066	3.96579	16.3626	0.003209	0.002645	0.002796	0.004633	0.006629	0.007032	0.007084	0.002723	0.030903	0.025477	0.026926	0.044626	Pytilia_hypogrammica	1
759	1	9.69831	894	99.3333	8.34483	3.45625	3.9952	15.7421	0.003188	0.002669	0.002812	0.002844	0.006675	0.00708	0.007133	0.002741	0.030914	0.025889	0.02727	0.027585	Hypargos_niveoguttatus	1
760	1	10.2316	895	99.4444	9.78089	3.49827	4.0499	19.9052	0.003883	0.002646	0.002843	0.00595	0.007042	0.00747	0.007525	0.002892	0.039725	0.027077	0.029084	0.060875	Uraeginthus_bengalus	1
761	2	8.946	895	99.4444	9.69694	3.54763	4.08813	21.2461	0.003751	0.00262	0.002852	0.004726	0.006158	0.006531	0.00658	0.002529	0.03356	0.023441	0.025511	0.042275	Amadina_erythrocephala,Amadina_fasciata	1
762	1	1.94893	899	99.8889	13.2585	3.52336	4.37066	29.845	0.005076	0.002678	0.003021	0.007797	0.001341	0.001423	0.001433	0.000551	0.009892	0.005219	0.005888	0.015196	Amadina_erythrocephala	1
763	1	1.94893	896	99.5556	13.9083	3.29984	4.28278	41.9571	0.005229	0.002646	0.002957	0.009088	0.001341	0.001423	0.001433	0.000551	0.010191	0.005157	0.005762	0.017711	Amadina_fasciata	1
764	1	11.2521	894	99.3333	9.06005	3.66102	3.95016	30.4362	0.003114	0.00263	0.002801	0.002599	0.007745	0.008215	0.008276	0.003181	0.035036	0.029596	0.031517	0.029246	Estrilda_troglodytes	1
765	2	3.92545	894	99.3333	11.3001	3.05939	4.1029	34.4386	0.004271	0.002618	0.002863	0.008656	0.002702	0.002866	0.002887	0.00111	0.016766	0.010277	0.01124	0.03398	Erythrura_gouldiae,Erythrura_trichroa	1
766	1	8.25337	894	99.3333	8.32753	3.43181	4.01752	13.9855	0.003275	0.002619	0.002818	0.002924	0.005681	0.006025	0.00607	0.002333	0.027031	0.021614	0.02326	0.024135	Erythrura_gouldiae	1
767	1	8.25337	895	99.4444	10.7627	3.99203	4.13677	44.2574	0.003849	0.002619	0.002859	0.005141	0.005681	0.006025	0.00607	0.002333	0.031765	0.021612	0.023595	0.04243	Erythrura_trichroa	1
768	9	2.54928	894	99.3333	8.42291	3.42982	4.00953	14.3473	0.003407	0.002586	0.002804	0.004836	0.001755	0.001861	0.001875	0.000721	0.008685	0.006592	0.007149	0.012329	Lonchura_fringilloides,Lonchura_pallida,Lonchura_punctulata,Neochmia_modesta,Neochmia_ruficauda,Poephila_acuticauda,Poephila_cincta,Taeniopygia_bichenovii,Taeniopygia_guttata	1
769	7	1e-05	895	99.4444	10.113	3.20104	4.18786	21.936	0.004284	0.002697	0.002864	0.008919	0	0	0	0	0	0	0	0	Lonchura_fringilloides,Lonchura_pallida,Lonchura_punctulata,Poephila_acuticauda,Poephila_cincta,Taeniopygia_bichenovii,Taeniopygia_guttata	1
770	3	1.31094	895	99.4444	10.817	3.26856	4.18786	26.7502	0.004298	0.00264	0.00288	0.007281	0.000902	0.000957	0.000964	0.000371	0.005635	0.003461	0.003776	0.009544	Lonchura_fringilloides,Lonchura_pallida,Lonchura_punctulata	1
771	1	10.2762	895	99.4444	10.6764	3.48011	4.11916	45.4695	0.003579	0.002619	0.002848	0.004333	0.007073	0.007502	0.007558	0.002905	0.036776	0.026909	0.029263	0.044527	Lonchura_fringilloides	1
772	2	5.38834	896	99.5556	10.9977	3.30114	4.21618	37.3117	0.003911	0.002633	0.002887	0.005168	0.003709	0.003934	0.003963	0.001523	0.021072	0.014188	0.015555	0.027849	Lonchura_pallida,Lonchura_punctulata	1
773	1	4.88791	896	99.5556	10.8413	3.59232	4.20158	32.3836	0.003964	0.002647	0.002906	0.005091	0.003364	0.003568	0.003595	0.001382	0.019376	0.012938	0.014205	0.024886	Lonchura_punctulata	1
774	1	4.88791	897	99.6667	12.3188	3.19748	4.20158	45.939	0.004233	0.0026	0.002917	0.007013	0.003364	0.003568	0.003595	0.001382	0.020688	0.01271	0.014257	0.034279	Lonchura_pallida	1
775	4	3.36012	895	99.4444	12.9946	3.63796	4.53824	29.7837	0.005311	0.002727	0.003079	0.008953	0.002313	0.002453	0.002471	0.00095	0.017847	0.009162	0.010345	0.030082	Poephila_acuticauda,Poephila_cincta,Taeniopygia_bichenovii,Taeniopygia_guttata	1
776	2	5.84916	896	99.5556	25.0139	3.92874	5.26038	79.9096	0.009191	0.002957	0.003415	0.022662	0.004026	0.00427	0.004302	0.001653	0.05376	0.017296	0.019973	0.132553	Poephila_acuticauda,Poephila_cincta	1
777	1	2.37791	896	99.5556	33.6768	3.75665	5.59393	127.003	0.011597	0.003551	0.003544	0.040123	0.001637	0.001736	0.001749	0.000672	0.027576	0.008445	0.008426	0.095409	Poephila_cincta	1
778	1	2.37791	900	100	52.092	6.90869	18.0926	136.892	0.019775	0.003756	0.009731	0.028231	0.001637	0.001736	0.001749	0.000672	0.047023	0.008931	0.02314	0.067131	Poephila_acuticauda	1
779	2	1e-05	896	99.5556	17.7348	4.15714	4.54559	63.7684	0.007042	0.002684	0.003109	0.020028	0	0	0	0	0	0	0	0	Taeniopygia_bichenovii,Taeniopygia_guttata	1
780	1	8.22707	896	99.5556	13.1613	3.80981	4.49564	47.0001	0.005099	0.002664	0.003043	0.009355	0.005663	0.006006	0.006051	0.002326	0.041948	0.021918	0.025033	0.076961	Taeniopygia_bichenovii	1
781	1	8.22707	896	99.5556	14.2268	3.46929	4.52246	51.3436	0.005723	0.002803	0.003051	0.015317	0.005663	0.006006	0.006051	0.002326	0.047086	0.023061	0.025104	0.126011	Taeniopygia_guttata	1
782	2	3.36012	894	99.3333	9.1722	3.41373	4.00878	19.624	0.003482	0.002596	0.002808	0.003796	0.002313	0.002453	0.002471	0.00095	0.011701	0.008724	0.009437	0.012754	Neochmia_modesta,Neochmia_ruficauda	1
783	1	8.22707	894	99.3333	9.3365	3.35622	3.96986	28.6487	0.003277	0.002574	0.0028	0.002964	0.005663	0.006006	0.006051	0.002326	0.026957	0.021176	0.023035	0.024381	Neochmia_ruficauda	1
784	1	8.22707	894	99.3333	8.52695	3.30195	4.00878	14.7237	0.00344	0.002642	0.002801	0.005469	0.005663	0.006006	0.006051	0.002326	0.028303	0.021736	0.023042	0.044997	Neochmia_modesta	1
785	3	44.0633	894	99.3333	11.5819	3.25754	4.17385	26.1298	0.004762	0.002623	0.002907	0.00813	0.030329	0.032169	0.032409	0.012455	0.209832	0.115594	0.128098	0.358216	Dromaius_novaehollandiae,Rhea_americana,Struthio_camelus	1
786	2	1e-05	895	99.4444	12.6754	3.48517	4.14435	44.7965	0.005164	0.002607	0.002872	0.016319	0	0	0	0	0	0	0	0	Dromaius_novaehollandiae,Struthio_camelus	1
787	1	73.4	894	99.3333	9.26343	3.35597	4.07726	17.8856	0.003603	0.002629	0.002843	0.004068	0.050521	0.053586	0.053986	0.020748	0.264444	0.192955	0.208642	0.29862	Struthio_camelus	1
788	1	73.4	894	99.3333	14.243	4.29932	4.14088	93.1429	0.006281	0.002053	0.002875	0.06474	0.050521	0.053586	0.053986	0.020748	0.460999	0.15068	0.211034	4.75192	Dromaius_novaehollandiae	1
789	1	73.4	894	99.3333	8.75867	3.32287	4.02954	16.329	0.003305	0.002593	0.002814	0.002698	0.050521	0.053586	0.053986	0.020748	0.242602	0.190319	0.206574	0.198032	Rhea_americana	1
790	1	9.2	509	56.5556	16.2076	1.6019	3.451	54.5896	0.005583	0.001089	0.001248	0.009835	0.006332	0.006716	0.006767	0.002601	0.051363	0.010018	0.01148	0.090479	Euparkeria_capensis	0
791	15	49.5438	270	30	3.42001	1.06392	1	10.0563	0.001266	0.000754	0.000834	0.001817	0.034101	0.03617	0.036439	0.014005	0.062701	0.037341	0.041301	0.09	Apalone_ferox,Batagur_borneoensis,Chelus_fimbriata,Chelydra_serpentina,Dogania_subplana,Macrochelys_temminckii,Mauremys_reevesii,Pelodiscus_sinensis,Pelomedusa_subrufa,Platysternon_megacephalum,Staurotypus_triporcatus,Sternotherus_odoratus,Terrapene_carolina,Testudo_horsfieldii,Trachemys_scripta	0
792	13	31.1927	277	30.7778	3.73837	1.11048	1	14.7937	0.001311	0.000745	0.000836	0.003615	0.02147	0.022772	0.022942	0.008817	0.040899	0.023225	0.026062	0.112771	Apalone_ferox,Batagur_borneoensis,Chelydra_serpentina,Dogania_subplana,Macrochelys_temminckii,Mauremys_reevesii,Pelodiscus_sinensis,Platysternon_megacephalum,Staurotypus_triporcatus,Sternotherus_odoratus,Terrapene_carolina,Testudo_horsfieldii,Trachemys_scripta	0
793	10	77.5551	287	31.8889	3.63436	1.12527	1	13.6138	0.001204	0.00075	0.000842	0.001866	0.053381	0.056619	0.057042	0.021923	0.093398	0.058149	0.065313	0.14475	Batagur_borneoensis,Chelydra_serpentina,Macrochelys_temminckii,Mauremys_reevesii,Platysternon_megacephalum,Staurotypus_triporcatus,Sternotherus_odoratus,Terrapene_carolina,Testudo_horsfieldii,Trachemys_scripta	0
794	2	40.1	298	33.1111	3.1617	1.03173	1	6.07883	0.001226	0.000749	0.000842	0.001817	0.027601	0.029275	0.029494	0.011335	0.04915	0.030027	0.03377	0.072863	Staurotypus_triporcatus,Sternotherus_odoratus	0
795	1	54.2	322	35.7778	3.56426	1.08693	1	8.21219	0.001357	0.000775	0.000861	0.001913	0.037306	0.039569	0.039864	0.015321	0.073524	0.042031	0.046666	0.103696	Staurotypus_triporcatus	0
796	1	54.2	311	34.5556	3.2988	1.01582	1	6.14114	0.001404	0.000759	0.00085	0.003823	0.037306	0.039569	0.039864	0.015321	0.076085	0.041127	0.04607	0.207191	Sternotherus_odoratus	0
797	8	2.90014	325	36.1111	3.92441	1.11781	1	13.5167	0.001364	0.000768	0.000872	0.001846	0.001996	0.002117	0.002133	0.00082	0.003956	0.002228	0.002529	0.005353	Batagur_borneoensis,Chelydra_serpentina,Macrochelys_temminckii,Mauremys_reevesii,Platysternon_megacephalum,Terrapene_carolina,Testudo_horsfieldii,Trachemys_scripta	0
798	6	18.2999	336	37.3333	4.31939	1.07597	1	11.9742	0.001559	0.000777	0.000883	0.003803	0.012596	0.01336	0.01346	0.005173	0.028522	0.014228	0.016159	0.069602	Batagur_borneoensis,Mauremys_reevesii,Platysternon_megacephalum,Terrapene_carolina,Testudo_horsfieldii,Trachemys_scripta	0
799	1	73.1	335	37.2222	4.50261	1.09365	1	13.9224	0.001561	0.000777	0.000885	0.003971	0.050314	0.053367	0.053765	0.020663	0.114142	0.056806	0.064693	0.290307	Platysternon_megacephalum	0
800	5	1e-05	357	39.6667	4.98472	0.985415	1	23.0523	0.001593	0.000798	0.00089	0.003668	0	0	0	0	0	0	0	0	Batagur_borneoensis,Mauremys_reevesii,Terrapene_carolina,Testudo_horsfieldii,Trachemys_scripta	0
801	3	4.4	379	42.1111	4.87153	0.919125	1	15.7883	0.001744	0.000837	0.000913	0.004406	0.003029	0.003212	0.003236	0.001244	0.007672	0.003683	0.004015	0.019387	Batagur_borneoensis,Mauremys_reevesii,Testudo_horsfieldii	0
802	1	68.7	375	41.6667	4.24114	1.06336	1	11.1649	0.001548	0.000781	0.000907	0.002809	0.047286	0.050155	0.050529	0.01942	0.106361	0.053665	0.062345	0.192966	Testudo_horsfieldii	0
803	2	21	378	42	4.6249	1.18829	1	17.3592	0.001553	0.000787	0.000907	0.002361	0.014454	0.015331	0.015445	0.005936	0.032609	0.016524	0.019047	0.049583	Batagur_borneoensis,Mauremys_reevesii	0
804	1	47.7	376	41.7778	4.51595	0.822983	1	17.4097	0.001449	0.000782	0.000904	0.00197	0.032832	0.034824	0.035083	0.013483	0.069132	0.037279	0.043097	0.09396	Mauremys_reevesii	0
805	1	47.7	382	42.4444	5.5235	1.11778	1	21.5046	0.001766	0.000801	0.000914	0.003286	0.032832	0.034824	0.035083	0.013483	0.084231	0.038223	0.043622	0.156737	Batagur_borneoensis	0
806	2	30.4567	365	40.5556	4.16728	1.04245	1	12.0613	0.001398	0.000791	0.000904	0.001749	0.020963	0.022235	0.022401	0.008609	0.042571	0.024081	0.027518	0.053271	Terrapene_carolina,Trachemys_scripta	0
807	1	42.6433	357	39.6667	3.71694	1.06953	1	8.51581	0.001329	0.000782	0.00089	0.001799	0.029351	0.031132	0.031364	0.012054	0.056685	0.033345	0.037953	0.076701	Terrapene_carolina	0
808	1	42.6433	364	40.4444	3.60456	1.05657	1	7.6575	0.001348	0.000772	0.000894	0.001689	0.029351	0.031132	0.031364	0.012054	0.057487	0.0329	0.038123	0.07201	Trachemys_scripta	0
809	2	49.3565	367	40.7778	5.11245	0.970139	1	26.7958	0.001588	0.000766	0.000904	0.004676	0.033972	0.036033	0.036302	0.013952	0.078372	0.037829	0.044618	0.230769	Chelydra_serpentina,Macrochelys_temminckii	0
810	1	42.0433	365	40.5556	4.39465	1.14439	1	15.0405	0.001529	0.000754	0.000899	0.002896	0.028938	0.030694	0.030923	0.011884	0.064279	0.031695	0.037796	0.12174	Chelydra_serpentina	0
811	1	42.0433	400	44.4444	6.32269	1.08861	1	20.7696	0.002144	0.000824	0.000937	0.003471	0.028938	0.030694	0.030923	0.011884	0.09014	0.034653	0.039395	0.145936	Macrochelys_temminckii	0
812	3	94.1551	289	32.1111	3.12643	0.993132	1	6.04993	0.001166	0.000749	0.000832	0.001577	0.064807	0.068738	0.069251	0.026615	0.109775	0.070569	0.078384	0.148495	Apalone_ferox,Dogania_subplana,Pelodiscus_sinensis	0
813	1	77.7	285	31.6667	3.22408	1.09617	1	9.07997	0.001132	0.000761	0.000832	0.001366	0.053481	0.056725	0.057148	0.021964	0.087952	0.059092	0.064646	0.106109	Dogania_subplana	0
814	2	20.92	310	34.4444	4.34569	1.32552	1	24.1227	0.001423	0.000755	0.000843	0.002736	0.014399	0.015273	0.015387	0.005914	0.029769	0.015785	0.017628	0.057237	Apalone_ferox,Pelodiscus_sinensis	0
815	1	56.78	306	34	3.12199	0.97871	1	5.6735	0.0012	0.000758	0.000836	0.00163	0.039081	0.041452	0.041762	0.01605	0.068137	0.043054	0.04744	0.092558	Apalone_ferox	0
816	1	56.78	298	33.1111	3.21381	1.00452	1	8.95016	0.001103	0.000752	0.000832	0.000997	0.039081	0.041452	0.041762	0.01605	0.062628	0.04268	0.047241	0.056628	Pelodiscus_sinensis	0
817	2	77.1683	397	44.1111	5.74784	1.0918	1	12.8308	0.002483	0.000785	0.000925	0.004779	0.053115	0.056337	0.056757	0.021813	0.191631	0.06061	0.071419	0.368767	Chelus_fimbriata,Pelomedusa_subrufa	0
818	1	125.88	316	35.1111	3.95204	1.06235	1	8.68251	0.001555	0.000736	0.00087	0.002822	0.086642	0.091899	0.092584	0.035583	0.195748	0.092589	0.109515	0.355279	Chelus_fimbriata	0
819	1	125.88	303	33.6667	3.5824	0.979412	1	7.15193	0.001445	0.000759	0.000856	0.002547	0.086642	0.091899	0.092584	0.035583	0.181876	0.095587	0.107753	0.320674	Pelomedusa_subrufa	0
820	24	26.2463	144	16	2.89071	1.1371	1	19.5648	0.001054	0.000749	0.000767	0.002635	0.018065	0.019161	0.019304	0.007419	0.02766	0.019656	0.020131	0.06917	Anolis_chloris,Anolis_cristatellus,Anolis_distichus,Anolis_equestris,Anolis_garmani,Anolis_gundlachi,Anolis_limifrons,Anolis_oxylophus,Anolis_pulchellus,Anolis_sheplani,Anolis_valencienni,Corucia_zebrata,Dactyloa_frenata,Gallotia_galloti,Laudakia_stellio,Norops_auratus,Norops_humilis,Saara_hardwickii,Sphenodon_punctatus,Tiliqua_scincoides,Tupinambis_merianae,Uromastyx_acanthinura,Xenosaurus_grand…	0
821	23	63.6605	162	18	2.00384	0.992999	1	3.12909	0.000835	0.000723	0.000764	0.000657	0.043817	0.046476	0.046822	0.017995	0.053185	0.046043	0.048639	0.041843	Anolis_chloris,Anolis_cristatellus,Anolis_distichus,Anolis_equestris,Anolis_garmani,Anolis_gundlachi,Anolis_limifrons,Anolis_oxylophus,Anolis_pulchellus,Anolis_sheplani,Anolis_valencienni,Corucia_zebrata,Dactyloa_frenata,Gallotia_galloti,Laudakia_stellio,Norops_auratus,Norops_humilis,Saara_hardwickii,Tiliqua_scincoides,Tupinambis_merianae,Uromastyx_acanthinura,Xenosaurus_grandis,Xenosaurus_platyc…	0
822	21	5.87881	179	19.8889	2.55145	0.993655	1	7.71947	0.001046	0.000728	0.000767	0.002056	0.004046	0.004292	0.004324	0.001662	0.006147	0.00428	0.004509	0.012085	Anolis_chloris,Anolis_cristatellus,Anolis_distichus,Anolis_equestris,Anolis_garmani,Anolis_gundlachi,Anolis_limifrons,Anolis_oxylophus,Anolis_pulchellus,Anolis_sheplani,Anolis_valencienni,Dactyloa_frenata,Gallotia_galloti,Laudakia_stellio,Norops_auratus,Norops_humilis,Saara_hardwickii,Tupinambis_merianae,Uromastyx_acanthinura,Xenosaurus_grandis,Xenosaurus_platyceps	0
823	2	27.2699	212	23.5556	3.06681	1.04011	1	9.76754	0.001304	0.000747	0.000778	0.003138	0.01877	0.019908	0.020057	0.007708	0.035547	0.020374	0.021216	0.085575	Gallotia_galloti,Tupinambis_merianae	0
824	1	154.721	220	24.4444	3.31489	1.18983	1	12.4284	0.001304	0.000752	0.000783	0.002827	0.106494	0.112955	0.113797	0.043735	0.201693	0.11636	0.121224	0.437351	Gallotia_galloti	0
825	1	154.721	188	20.8889	2.25111	1.05204	1	4.50312	0.000921	0.000723	0.000767	0.0011	0.106494	0.112955	0.113797	0.043735	0.142479	0.111887	0.118748	0.170248	Tupinambis_merianae	0
826	19	13.0955	180	20	2.21777	1.05075	1	4.55199	0.000889	0.00071	0.000762	0.001012	0.009014	0.00956	0.009632	0.003702	0.011643	0.009294	0.009985	0.013255	Anolis_chloris,Anolis_cristatellus,Anolis_distichus,Anolis_equestris,Anolis_garmani,Anolis_gundlachi,Anolis_limifrons,Anolis_oxylophus,Anolis_pulchellus,Anolis_sheplani,Anolis_valencienni,Dactyloa_frenata,Laudakia_stellio,Norops_auratus,Norops_humilis,Saara_hardwickii,Uromastyx_acanthinura,Xenosaurus_grandis,Xenosaurus_platyceps	0
827	17	6.35345	190	21.1111	2.46357	1.00974	1	8.82612	0.000924	0.000722	0.000757	0.001487	0.004373	0.004638	0.004673	0.001796	0.005868	0.004589	0.00481	0.009449	Anolis_chloris,Anolis_cristatellus,Anolis_distichus,Anolis_equestris,Anolis_garmani,Anolis_gundlachi,Anolis_limifrons,Anolis_oxylophus,Anolis_pulchellus,Anolis_sheplani,Anolis_valencienni,Dactyloa_frenata,Laudakia_stellio,Norops_auratus,Norops_humilis,Saara_hardwickii,Uromastyx_acanthinura	0
828	3	70.4401	212	23.5556	2.2101	1.00902	1	4.21532	0.000912	0.000713	0.000752	0.001422	0.048484	0.051425	0.051809	0.019911	0.064267	0.050204	0.052971	0.100175	Laudakia_stellio,Saara_hardwickii,Uromastyx_acanthinura	0
829	2	53.502	214	23.7778	2.33882	1.08538	1	7.21065	0.00085	0.000717	0.00075	0.00083	0.036825	0.039059	0.039351	0.015124	0.045453	0.038366	0.040126	0.044421	Saara_hardwickii,Uromastyx_acanthinura	0
830	1	38.6	204	22.6667	2.07174	0.964586	1	3.65186	0.000823	0.000721	0.000749	0.00065	0.026568	0.02818	0.02839	0.010911	0.031759	0.027843	0.028916	0.025079	Saara_hardwickii	0
831	1	38.6	215	23.8889	1.9953	0.98314	1	3.15759	0.00082	0.000719	0.000751	0.000656	0.026568	0.02818	0.02839	0.010911	0.031638	0.027766	0.028969	0.025303	Uromastyx_acanthinura	0
832	1	92.102	208	23.1111	2.19842	1.01056	1	4.35199	0.000883	0.000723	0.000752	0.001173	0.063393	0.067239	0.067741	0.026035	0.081352	0.06662	0.069307	0.108004	Laudakia_stellio	0
833	14	114.699	197	21.8889	2.31707	1.06975	1	7.36823	0.00085	0.000717	0.000751	0.000974	0.078947	0.083736	0.084361	0.032422	0.097519	0.082222	0.086196	0.111742	Anolis_chloris,Anolis_cristatellus,Anolis_distichus,Anolis_equestris,Anolis_garmani,Anolis_gundlachi,Anolis_limifrons,Anolis_oxylophus,Anolis_pulchellus,Anolis_sheplani,Anolis_valencienni,Dactyloa_frenata,Norops_auratus,Norops_humilis	0
834	12	1e-05	219	24.3333	2.54487	1.07839	1	6.2212	0.001093	0.000709	0.000757	0.001999	0	0	0	0	0	0	0	0	Anolis_chloris,Anolis_cristatellus,Anolis_distichus,Anolis_equestris,Anolis_garmani,Anolis_gundlachi,Anolis_limifrons,Anolis_oxylophus,Anolis_pulchellus,Anolis_sheplani,Anolis_valencienni,Dactyloa_frenata	0
835	11	1e-05	227	25.2222	2.20532	0.972702	1	3.92859	0.000958	0.000728	0.000752	0.001628	0	0	0	0	0	0	0	0	Anolis_chloris,Anolis_cristatellus,Anolis_distichus,Anolis_equestris,Anolis_garmani,Anolis_gundlachi,Anolis_limifrons,Anolis_oxylophus,Anolis_pulchellus,Anolis_sheplani,Anolis_valencienni	0
836	1	47.843	228	25.3333	2.75469	1.06815	1	6.32255	0.001038	0.000721	0.000767	0.001428	0.03293	0.034928	0.035189	0.013524	0.049659	0.034488	0.036696	0.068304	Anolis_chloris	0
837	10	8.13139	223	24.7778	2.27323	1.0557	1	6.75686	0.000883	0.000731	0.000749	0.001292	0.005597	0.005936	0.005981	0.002299	0.007177	0.005947	0.00609	0.010503	Anolis_cristatellus,Anolis_distichus,Anolis_equestris,Anolis_garmani,Anolis_gundlachi,Anolis_limifrons,Anolis_oxylophus,Anolis_pulchellus,Anolis_sheplani,Anolis_valencienni	0
838	9	5.28952	272	30.2222	2.45396	1.035	1	6.07502	0.00103	0.000717	0.000749	0.001775	0.003641	0.003862	0.00389	0.001495	0.00545	0.00379	0.003962	0.009387	Anolis_cristatellus,Anolis_distichus,Anolis_garmani,Anolis_gundlachi,Anolis_limifrons,Anolis_oxylophus,Anolis_pulchellus,Anolis_sheplani,Anolis_valencienni	0
839	8	1.36158	278	30.8889	2.73109	1.16028	1	12.4967	0.000929	0.000708	0.000737	0.001445	0.000937	0.000994	0.001001	0.000385	0.001266	0.000964	0.001004	0.001968	Anolis_cristatellus,Anolis_distichus,Anolis_garmani,Anolis_gundlachi,Anolis_limifrons,Anolis_oxylophus,Anolis_pulchellus,Anolis_valencienni	0
840	4	6.85667	279	31	2.20838	1.01754	1	7.59291	0.000827	0.000723	0.000727	0.001055	0.004719	0.005006	0.005043	0.001938	0.005669	0.00496	0.004985	0.007234	Anolis_cristatellus,Anolis_distichus,Anolis_gundlachi,Anolis_pulchellus	0
841	3	7.38169	300	33.3333	1.87952	0.96297	1	2.98968	0.000773	0.00072	0.000727	0.000594	0.005081	0.005389	0.005429	0.002087	0.00571	0.005317	0.005366	0.004383	Anolis_cristatellus,Anolis_gundlachi,Anolis_pulchellus	0
842	2	2.48659	316	35.1111	2.92948	0.987141	1	18.8965	0.000933	0.000729	0.000727	0.001499	0.001712	0.001815	0.001829	0.000703	0.002319	0.001813	0.001808	0.003728	Anolis_gundlachi,Anolis_pulchellus	0
843	1	16.3356	303	33.6667	2.03069	0.947235	1	4.00859	0.000833	0.000722	0.000727	0.000942	0.011244	0.011926	0.012015	0.004618	0.013606	0.011799	0.011872	0.015389	Anolis_gundlachi	0
844	1	16.3356	309	34.3333	2.47335	1.24427	1	16.1862	0.000829	0.00072	0.000727	0.001082	0.011244	0.011926	0.012015	0.004618	0.013536	0.011757	0.011879	0.017682	Anolis_pulchellus	0
845	1	18.8222	295	32.7778	1.9284	0.943803	1	3.64396	0.000782	0.000717	0.000726	0.000763	0.012955	0.013741	0.013844	0.005321	0.014715	0.013504	0.013665	0.014352	Anolis_cristatellus	0
846	1	26.2039	273	30.3333	2.24605	1.05003	1	7.54916	0.000836	0.000702	0.000728	0.001429	0.018036	0.01913	0.019273	0.007407	0.021912	0.018404	0.019068	0.037433	Anolis_distichus	0
847	4	7.67877	279	31	2.01243	0.979009	1	3.76695	0.000811	0.000719	0.000729	0.00095	0.005285	0.005606	0.005648	0.002171	0.00623	0.005521	0.005599	0.007299	Anolis_garmani,Anolis_limifrons,Anolis_oxylophus,Anolis_valencienni	0
848	2	15.4745	290	32.2222	1.94102	0.954968	1	3.27256	0.000794	0.000728	0.00073	0.000812	0.010651	0.011297	0.011382	0.004374	0.012291	0.011261	0.011295	0.012567	Anolis_limifrons,Anolis_oxylophus	0
849	1	9.90726	288	32	2.0755	0.978461	1	4.22779	0.000845	0.000721	0.000729	0.001069	0.006819	0.007233	0.007287	0.002801	0.008375	0.007145	0.007224	0.01059	Anolis_limifrons	0
850	1	9.90726	286	31.7778	1.96951	0.938113	1	3.46788	0.000847	0.000733	0.000728	0.001543	0.006819	0.007233	0.007287	0.002801	0.008396	0.00726	0.007212	0.015291	Anolis_oxylophus	0
851	2	4.37597	285	31.6667	2.36733	1.08163	1	13.4236	0.000847	0.000724	0.00073	0.001155	0.003012	0.003195	0.003219	0.001237	0.003707	0.003168	0.003193	0.005055	Anolis_garmani,Anolis_valencienni	0
852	1	21.0058	280	31.1111	1.93388	0.964639	1	3.28763	0.000807	0.00071	0.000728	0.00102	0.014458	0.015335	0.01545	0.005938	0.016956	0.014906	0.015282	0.02143	Anolis_garmani	0
853	1	21.0058	280	31.1111	2.00437	0.949405	1	3.94504	0.000801	0.000711	0.000729	0.001006	0.014458	0.015335	0.01545	0.005938	0.016829	0.014935	0.015313	0.021141	Anolis_valencienni	0
854	1	34.4221	248	27.5556	1.95373	0.985624	1	3.06721	0.000819	0.000723	0.000738	0.000762	0.023693	0.02513	0.025317	0.00973	0.028202	0.024893	0.025404	0.026217	Anolis_sheplani	0
855	1	39.7116	250	27.7778	2.51342	0.974159	1	5.57687	0.001028	0.000725	0.000766	0.001386	0.027333	0.028992	0.029208	0.011225	0.040824	0.028803	0.030425	0.055043	Anolis_equestris	0
856	1	47.843	205	22.7778	1.97291	1.00061	1	3.09042	0.000825	0.000717	0.000749	0.000825	0.03293	0.034928	0.035189	0.013524	0.039456	0.034327	0.03584	0.039454	Dactyloa_frenata	0
857	2	22.4613	215	23.8889	2.42117	1.06684	1	7.44775	0.000979	0.000716	0.000752	0.001868	0.01546	0.016398	0.01652	0.006349	0.021997	0.016085	0.016891	0.041953	Norops_auratus,Norops_humilis	0
858	1	25.3818	208	23.1111	2.17278	0.992247	1	4.03457	0.000906	0.000715	0.000755	0.001529	0.01747	0.01853	0.018668	0.007175	0.022997	0.018152	0.019171	0.038815	Norops_humilis	0
859	1	25.3818	204	22.6667	2.36965	1.16029	1	8.24865	0.000893	0.00074	0.000757	0.001372	0.01747	0.01853	0.018668	0.007175	0.022664	0.01879	0.019214	0.034832	Norops_auratus	0
860	2	151.459	195	21.6667	2.18471	1.0163	1	3.74316	0.000897	0.000718	0.000766	0.000883	0.104249	0.110573	0.111398	0.042813	0.135838	0.108711	0.116017	0.133735	Xenosaurus_grandis,Xenosaurus_platyceps	0
861	1	17.4368	226	25.1111	3.04505	1.17472	1	10.171	0.001222	0.000724	0.00078	0.002326	0.012002	0.01273	0.012825	0.004929	0.021314	0.012617	0.013592	0.040566	Xenosaurus_platyceps	0
862	1	17.4368	236	26.2222	3.01296	1.06114	1	7.61047	0.001238	0.000733	0.000783	0.002075	0.012002	0.01273	0.012825	0.004929	0.021586	0.012782	0.013662	0.036188	Xenosaurus_grandis	0
863	2	156.189	178	19.7778	2.62649	1.07385	1	9.33349	0.00098	0.000719	0.000767	0.001356	0.107505	0.114026	0.114877	0.04415	0.153081	0.112248	0.119797	0.2118	Corucia_zebrata,Tiliqua_scincoides	0
864	1	31.6805	184	20.4444	2.40557	1.04583	1	4.83129	0.001027	0.000735	0.000769	0.00177	0.021806	0.023128	0.023301	0.008955	0.032534	0.023281	0.024362	0.05607	Tiliqua_scincoides	0
865	1	31.6805	177	19.6667	2.53921	1.06905	1	10.4834	0.000923	0.000719	0.000767	0.001116	0.021806	0.023128	0.023301	0.008955	0.029253	0.022775	0.024315	0.035347	Corucia_zebrata	0
866	1	251.53	134	14.8889	2.03652	0.973593	1	4.66378	0.000827	0.000716	0.00076	0.000988	0.173127	0.18363	0.185001	0.071101	0.208025	0.180006	0.191289	0.248533	Sphenodon_punctatus	0
																						185

## Sheet: rep2
Node ID	No Taxa	Original BL	No different from original	Pct time scaled	Mean Scalar	Mode Scalar	Median Scalar	SD Scalar	Mean SigV	Mode SigV	Median SigV	SD SigV	Mean DeltaB	Mode DeltaB	Median DeltaB	SD DeltaB	Mean DeltaV	Mode DeltaV	Median DeltaV	SD DeltaV	Taxa List	PPS
0	434	0	0	0	0	0	0	0	0	0	0	0	0	0	0	0	0	0	0	0	Accipiter_cooperii,Accipiter_striatus,Acinonyx_jubatus,Ailuropoda_melanoleuca,Ailurus_fulgens,Alligator_mississippiensis,Alligator_sinensis,Allosaurus_fragilis,Alouatta_guariba,Amadina_erythrocephala,Amadina_fasciata,Anolis_chloris,Anolis_cristatellus,Anolis_distichus,Anolis_equestris,Anolis_garmani,Anolis_gundlachi,Anolis_limifrons,Anolis_oxylophus,Anolis_pulchellus,Anolis_sheplani,Anolis_valenc…	0
1	295	156.858	96	10.6667	1.13491	1.00804	1	1.38908	0.000679	0.000742	0.00068	0.000875	0.098423	0.116014	0.109173	0.049422	0.106562	0.116414	0.106664	0.137249	Acinonyx_jubatus,Ailuropoda_melanoleuca,Ailurus_fulgens,Alouatta_guariba,Aonyx_capensis,Aonyx_cinerea,Aotus_trivirgatus,Arctictis_binturong,Arctogalidia_trivirgata,Artibeus_jamaicensis,Artibeus_lituratus,Ateles_geoffroyi,Atelocynus_microtis,Australopithecus_afarensis,Australopithecus_africanus,Australopithecus_anamensis,Avahi_laniger,Bassaricyon_alleni,Bassaricyon_gabbii,Bassariscus_astutus,Bassa…	0
2	286	66.2136	146	16.2222	1.36993	0.971404	1	2.28339	0.000748	0.000751	0.000705	0.000986	0.041546	0.048972	0.046085	0.020862	0.049557	0.049704	0.046681	0.065269	Acinonyx_jubatus,Ailuropoda_melanoleuca,Ailurus_fulgens,Alouatta_guariba,Aonyx_capensis,Aonyx_cinerea,Aotus_trivirgatus,Arctictis_binturong,Arctogalidia_trivirgata,Artibeus_jamaicensis,Artibeus_lituratus,Ateles_geoffroyi,Atelocynus_microtis,Australopithecus_afarensis,Australopithecus_africanus,Australopithecus_anamensis,Avahi_laniger,Bassaricyon_alleni,Bassaricyon_gabbii,Bassariscus_astutus,Bassa…	0
3	231	15.5761	351	39	3.47084	1.00243	1	6.22918	0.001153	0.000746	0.000875	0.001796	0.009773	0.01152	0.010841	0.004908	0.017953	0.011615	0.013637	0.027981	Acinonyx_jubatus,Ailuropoda_melanoleuca,Ailurus_fulgens,Aonyx_capensis,Aonyx_cinerea,Arctictis_binturong,Arctogalidia_trivirgata,Artibeus_jamaicensis,Artibeus_lituratus,Atelocynus_microtis,Bassaricyon_alleni,Bassaricyon_gabbii,Bassariscus_astutus,Bassariscus_sumichrasti,Bdeogale_crassicauda,Canis_adustus,Canis_aureus,Canis_latrans,Canis_lupus,Canis_mesomelas,Caracal_aurata,Caracal_caracal,Carolli…	0
4	165	3.4833	363	40.3333	4.45987	0.887322	1	18.6706	0.001174	0.000743	0.000878	0.001728	0.002186	0.002576	0.002424	0.001097	0.004088	0.002589	0.003058	0.006018	Acinonyx_jubatus,Ailuropoda_melanoleuca,Ailurus_fulgens,Aonyx_capensis,Aonyx_cinerea,Arctictis_binturong,Arctogalidia_trivirgata,Atelocynus_microtis,Bassaricyon_alleni,Bassaricyon_gabbii,Bassariscus_astutus,Bassariscus_sumichrasti,Bdeogale_crassicauda,Canis_adustus,Canis_aureus,Canis_latrans,Canis_lupus,Canis_mesomelas,Caracal_aurata,Caracal_caracal,Cerdocyon_thous,Chrysocyon_brachyurus,Civettict…	0
5	163	23.4323	373	41.4444	3.83811	0.920627	1	11.0527	0.001087	0.000746	0.000866	0.001355	0.014703	0.017331	0.016309	0.007383	0.025471	0.017469	0.020295	0.031739	Acinonyx_jubatus,Ailuropoda_melanoleuca,Ailurus_fulgens,Aonyx_capensis,Aonyx_cinerea,Arctictis_binturong,Arctogalidia_trivirgata,Atelocynus_microtis,Bassaricyon_alleni,Bassaricyon_gabbii,Bassariscus_astutus,Bassariscus_sumichrasti,Bdeogale_crassicauda,Canis_adustus,Canis_aureus,Canis_latrans,Canis_lupus,Canis_mesomelas,Caracal_aurata,Caracal_caracal,Cerdocyon_thous,Chrysocyon_brachyurus,Civettict…	0
6	79	9.20378	371	41.2222	3.67302	0.983727	1	8.17655	0.001126	0.000737	0.000863	0.001747	0.005775	0.006807	0.006406	0.0029	0.010367	0.006779	0.007943	0.016083	Ailuropoda_melanoleuca,Ailurus_fulgens,Aonyx_capensis,Aonyx_cinerea,Atelocynus_microtis,Bassaricyon_alleni,Bassaricyon_gabbii,Bassariscus_astutus,Bassariscus_sumichrasti,Canis_adustus,Canis_aureus,Canis_latrans,Canis_lupus,Canis_mesomelas,Cerdocyon_thous,Chrysocyon_brachyurus,Conepatus_semistriatus,Cuon_alpinus,Eira_barbara,Enhydra_lutris,Galictis_cuja,Gulo_gulo,Helarctos_malayanus,Hydrictis_macu…	0
7	25	33.1564	368	40.8889	3.39321	0.963504	1	7.90149	0.00097	0.000755	0.000861	0.000771	0.020804	0.024523	0.023077	0.010447	0.032159	0.025029	0.028548	0.025564	Atelocynus_microtis,Canis_adustus,Canis_aureus,Canis_latrans,Canis_lupus,Canis_mesomelas,Cerdocyon_thous,Chrysocyon_brachyurus,Cuon_alpinus,Lycalopex_culpaeus,Lycalopex_griseus,Lycalopex_gymnocercus,Lycalopex_vetulus,Lycaon_pictus,Nyctereutes_procyonoides,Otocyon_megalotis,Speothos_venaticus,Urocyon_cinereoargenteus,Vulpes_chama,Vulpes_ferrilata,Vulpes_lagopus,Vulpes_rueppellii,Vulpes_velox,Vulpe…	0
8	24	1e-05	390	43.3333	3.78024	0.997232	1	9.2529	0.001246	0.000757	0.00087	0.002478	0	0	0	0	0	0	0	0	Atelocynus_microtis,Canis_adustus,Canis_aureus,Canis_latrans,Canis_lupus,Canis_mesomelas,Cerdocyon_thous,Chrysocyon_brachyurus,Cuon_alpinus,Lycalopex_culpaeus,Lycalopex_griseus,Lycalopex_gymnocercus,Lycalopex_vetulus,Lycaon_pictus,Nyctereutes_procyonoides,Otocyon_megalotis,Speothos_venaticus,Vulpes_chama,Vulpes_ferrilata,Vulpes_lagopus,Vulpes_rueppellii,Vulpes_velox,Vulpes_vulpes,Vulpes_zerda	0
9	16	1e-05	399	44.3333	3.76854	0.996448	1	7.72147	0.0012	0.000741	0.000877	0.001984	0	0	0	0	0	0	0	0	Atelocynus_microtis,Canis_adustus,Canis_aureus,Canis_latrans,Canis_lupus,Canis_mesomelas,Cerdocyon_thous,Chrysocyon_brachyurus,Cuon_alpinus,Lycalopex_culpaeus,Lycalopex_griseus,Lycalopex_gymnocercus,Lycalopex_vetulus,Lycaon_pictus,Nyctereutes_procyonoides,Speothos_venaticus	0
10	1	12.6	380	42.2222	3.1531	1.02128	1	4.86594	0.000973	0.000749	0.000866	0.000719	0.007906	0.009319	0.00877	0.00397	0.012261	0.009436	0.010913	0.009062	Nyctereutes_procyonoides	0
11	15	4.32467	405	45	3.4131	1.03099	1	5.94945	0.001091	0.000756	0.000878	0.001171	0.002714	0.003199	0.00301	0.001363	0.004719	0.003269	0.003797	0.005066	Atelocynus_microtis,Canis_adustus,Canis_aureus,Canis_latrans,Canis_lupus,Canis_mesomelas,Cerdocyon_thous,Chrysocyon_brachyurus,Cuon_alpinus,Lycalopex_culpaeus,Lycalopex_griseus,Lycalopex_gymnocercus,Lycalopex_vetulus,Lycaon_pictus,Speothos_venaticus	0
12	4	1.48415	429	47.6667	4.03815	0.994351	1	9.42956	0.00134	0.000766	0.000883	0.002903	0.000931	0.001098	0.001033	0.000468	0.001989	0.001137	0.001311	0.004309	Chrysocyon_brachyurus,Cuon_alpinus,Lycaon_pictus,Speothos_venaticus	0
13	2	0.707206	422	46.8889	3.93619	0.9272	1	12.4012	0.001191	0.000752	0.00087	0.002249	0.000444	0.000523	0.000492	0.000223	0.000842	0.000532	0.000616	0.001591	Chrysocyon_brachyurus,Cuon_alpinus	0
14	1	6.08397	410	45.5556	3.28062	1.03662	1	6.32348	0.001035	0.000756	0.000865	0.001646	0.003817	0.0045	0.004234	0.001917	0.006294	0.0046	0.005263	0.010015	Chrysocyon_brachyurus	0
15	1	6.08397	414	46	3.20328	1.05494	1	5.16619	0.00104	0.00075	0.000868	0.001344	0.003817	0.0045	0.004234	0.001917	0.006325	0.004562	0.005281	0.008177	Cuon_alpinus	0
16	2	1.33221	428	47.5556	4.50262	1.07316	1	13.6697	0.001299	0.000742	0.000889	0.002015	0.000836	0.000985	0.000927	0.00042	0.00173	0.000989	0.001185	0.002684	Lycaon_pictus,Speothos_venaticus	0
17	1	5.45897	410	45.5556	3.54186	1.02391	1	7.32646	0.001083	0.000747	0.000877	0.001373	0.003425	0.004038	0.003799	0.00172	0.005913	0.00408	0.004788	0.007496	Lycaon_pictus	0
18	1	5.45897	407	45.2222	3.2765	0.983176	1	5.52407	0.001087	0.000733	0.000875	0.002347	0.003425	0.004038	0.003799	0.00172	0.005934	0.004002	0.004779	0.012811	Speothos_venaticus	0
19	11	1.89435	421	46.7778	4.98618	1.31434	1	37.7039	0.001246	0.000732	0.000891	0.002432	0.001189	0.001401	0.001318	0.000597	0.002361	0.001387	0.001688	0.004607	Atelocynus_microtis,Canis_adustus,Canis_aureus,Canis_latrans,Canis_lupus,Canis_mesomelas,Cerdocyon_thous,Lycalopex_culpaeus,Lycalopex_griseus,Lycalopex_gymnocercus,Lycalopex_vetulus	0
20	6	2.07878	418	46.4444	3.86652	1.07299	1	10.5177	0.001172	0.000742	0.000898	0.00174	0.001304	0.001537	0.001447	0.000655	0.002437	0.001542	0.001866	0.003616	Atelocynus_microtis,Cerdocyon_thous,Lycalopex_culpaeus,Lycalopex_griseus,Lycalopex_gymnocercus,Lycalopex_vetulus	0
21	5	0.264882	431	47.8889	4.11745	0.992629	1	9.86923	0.001265	0.000774	0.000914	0.002293	0.000166	0.000196	0.000184	8.3e-05	0.000335	0.000205	0.000242	0.000607	Cerdocyon_thous,Lycalopex_culpaeus,Lycalopex_griseus,Lycalopex_gymnocercus,Lycalopex_vetulus	0
22	4	1.228	447	49.6667	4.19891	1.02461	1	10.6474	0.001288	0.00076	0.000929	0.00201	0.000771	0.000908	0.000855	0.000387	0.001582	0.000933	0.001141	0.002468	Lycalopex_culpaeus,Lycalopex_griseus,Lycalopex_gymnocercus,Lycalopex_vetulus	0
23	1	2.80932	437	48.5556	4.32159	0.9648	1	10.98	0.001243	0.000773	0.000926	0.001576	0.001763	0.002078	0.001955	0.000885	0.003493	0.002172	0.002601	0.004429	Lycalopex_vetulus	0
24	3	1.21914	476	52.8889	5.38961	1.16205	1.05803	19.6122	0.00192	0.000746	0.000956	0.010829	0.000765	0.000902	0.000849	0.000384	0.002341	0.00091	0.001165	0.013202	Lycalopex_culpaeus,Lycalopex_griseus,Lycalopex_gymnocercus	0
25	2	0.162036	488	54.2222	7.03684	1.34932	1.28412	31.3276	0.001936	0.000775	0.000982	0.004693	0.000102	0.00012	0.000113	5.1e-05	0.000314	0.000126	0.000159	0.00076	Lycalopex_culpaeus,Lycalopex_gymnocercus	0
26	1	1.42815	498	55.3333	6.35975	0.97342	1.40066	19.2787	0.001925	0.000795	0.00099	0.003865	0.000896	0.001056	0.000994	0.00045	0.002748	0.001136	0.001414	0.00552	Lycalopex_culpaeus	0
27	1	1.42815	476	52.8889	4.49986	1.06592	1.11001	9.13897	0.001539	0.000758	0.000957	0.003091	0.000896	0.001056	0.000994	0.00045	0.002197	0.001082	0.001367	0.004414	Lycalopex_gymnocercus	0
28	1	1.59018	500	55.5556	5.55605	1.13366	1.44771	12.5133	0.001996	0.000787	0.000992	0.004077	0.000998	0.001176	0.001107	0.000501	0.003174	0.001252	0.001578	0.006483	Lycalopex_griseus	0
29	1	4.03732	428	47.5556	3.64643	1.03853	1	6.50429	0.001181	0.00075	0.000912	0.001946	0.002533	0.002986	0.00281	0.001272	0.004768	0.003027	0.00368	0.007858	Cerdocyon_thous	0
30	1	4.3022	425	47.2222	4.05419	1.03777	1	13.4891	0.00117	0.000767	0.000899	0.001914	0.002699	0.003182	0.002994	0.001356	0.005034	0.003299	0.003868	0.008236	Atelocynus_microtis	0
31	5	1.2237	458	50.8889	4.55499	0.970131	1	10.8442	0.001461	0.000772	0.000936	0.002627	0.000768	0.000905	0.000852	0.000386	0.001787	0.000945	0.001146	0.003215	Canis_adustus,Canis_aureus,Canis_latrans,Canis_lupus,Canis_mesomelas	0
32	2	1.92801	466	51.7778	6.61586	1.1439	1.01257	31.895	0.001552	0.000764	0.000947	0.002517	0.00121	0.001426	0.001342	0.000607	0.002992	0.001473	0.001825	0.004852	Canis_adustus,Canis_mesomelas	0
33	1	3.22927	450	50	4.85377	0.896472	1	22.6045	0.001301	0.00077	0.00093	0.001812	0.002026	0.002388	0.002248	0.001017	0.0042	0.002488	0.003002	0.005851	Canis_adustus	0
34	1	3.22927	459	51	5.48881	1.20812	1	23.5463	0.001488	0.000753	0.000941	0.002403	0.002026	0.002388	0.002248	0.001017	0.004806	0.002431	0.003038	0.007759	Canis_mesomelas	0
35	3	1.85728	500	55.5556	6.14429	1.00048	1.38637	20.6992	0.00184	0.000802	0.000984	0.002919	0.001165	0.001374	0.001293	0.000585	0.003418	0.00149	0.001827	0.005421	Canis_aureus,Canis_latrans,Canis_lupus	0
36	1	3.3	694	77.1111	13.5605	1.88467	5.89066	32.5412	0.004862	0.001137	0.001705	0.006042	0.002071	0.002441	0.002297	0.00104	0.016044	0.003752	0.005625	0.019939	Canis_lupus	0
37	2	1.0768	513	57	6.20637	1.04245	1.49617	17.3388	0.00196	0.000807	0.000994	0.003024	0.000676	0.000796	0.000749	0.000339	0.002111	0.000869	0.00107	0.003256	Canis_aureus,Canis_latrans	0
38	1	2.2232	500	55.5556	5.36814	1.14084	1.3197	13.6511	0.001706	0.000766	0.000981	0.002592	0.001395	0.001644	0.001547	0.0007	0.003793	0.001702	0.002181	0.005763	Canis_latrans	0
39	1	2.2232	510	56.6667	5.37571	1.16373	1.39278	12.3205	0.001727	0.000791	0.000983	0.002332	0.001395	0.001644	0.001547	0.0007	0.003839	0.001758	0.002186	0.005185	Canis_aureus	0
40	8	1.5	390	43.3333	3.42072	1.05053	1	5.73759	0.001109	0.000755	0.00087	0.001534	0.000941	0.001109	0.001044	0.000473	0.001663	0.001133	0.001305	0.002301	Otocyon_megalotis,Vulpes_chama,Vulpes_ferrilata,Vulpes_lagopus,Vulpes_rueppellii,Vulpes_velox,Vulpes_vulpes,Vulpes_zerda	0
41	1	11.1	401	44.5556	4.1608	0.955709	1	12.7024	0.001187	0.000768	0.000889	0.001686	0.006965	0.00821	0.007726	0.003497	0.013177	0.008522	0.009865	0.018711	Otocyon_megalotis	0
42	7	1e-05	397	44.1111	4.22431	1.05667	1	11.1915	0.00132	0.000746	0.00087	0.002689	0	0	0	0	0	0	0	0	Vulpes_chama,Vulpes_ferrilata,Vulpes_lagopus,Vulpes_rueppellii,Vulpes_velox,Vulpes_vulpes,Vulpes_zerda	0
43	1	11.1	397	44.1111	3.9124	1.08942	1	12.1208	0.001079	0.000766	0.000868	0.001529	0.006965	0.00821	0.007726	0.003497	0.011982	0.008505	0.009635	0.016974	Vulpes_ferrilata	0
44	6	4.2827	391	43.4444	3.17394	1.02045	1	4.774	0.000994	0.00076	0.000862	0.001074	0.002687	0.003168	0.002981	0.001349	0.004256	0.003255	0.003692	0.004599	Vulpes_chama,Vulpes_lagopus,Vulpes_rueppellii,Vulpes_velox,Vulpes_vulpes,Vulpes_zerda	0
45	5	1.47933	407	45.2222	4.07638	0.918614	1	14.4696	0.001147	0.000771	0.00087	0.001901	0.000928	0.001094	0.00103	0.000466	0.001696	0.00114	0.001287	0.002812	Vulpes_lagopus,Vulpes_rueppellii,Vulpes_velox,Vulpes_vulpes,Vulpes_zerda	0
46	4	0.733307	422	46.8889	3.83499	1.00795	1	9.02197	0.001231	0.000736	0.000877	0.002385	0.00046	0.000542	0.00051	0.000231	0.000903	0.00054	0.000643	0.001749	Vulpes_lagopus,Vulpes_rueppellii,Vulpes_velox,Vulpes_vulpes	0
47	2	2.79817	427	47.4444	3.76338	1.08218	1	8.56095	0.001165	0.000741	0.000875	0.001488	0.001756	0.00207	0.001948	0.000882	0.003261	0.002074	0.00245	0.004164	Vulpes_rueppellii,Vulpes_vulpes	0
48	1	1.8065	444	49.3333	4.60881	0.927166	1	19.3928	0.001323	0.000752	0.000889	0.001939	0.001134	0.001336	0.001257	0.000569	0.002391	0.001358	0.001605	0.003504	Vulpes_vulpes	0
49	1	1.8065	452	50.2222	4.19685	0.962355	1	10.805	0.00131	0.000758	0.000897	0.001749	0.001134	0.001336	0.001257	0.000569	0.002366	0.001369	0.001621	0.003159	Vulpes_rueppellii	0
50	2	2.35467	420	46.6667	3.53502	1.0268	1	5.6874	0.00116	0.000752	0.000868	0.00158	0.001477	0.001742	0.001639	0.000742	0.002733	0.001771	0.002044	0.003719	Vulpes_lagopus,Vulpes_velox	0
51	1	2.25	416	46.2222	3.63064	0.954512	1	9.14654	0.001146	0.000758	0.000865	0.002076	0.001412	0.001664	0.001566	0.000709	0.002579	0.001705	0.001947	0.004671	Vulpes_lagopus	0
52	1	2.25	418	46.4444	3.86201	1.08342	1	8.71969	0.001165	0.00075	0.000868	0.001867	0.001412	0.001664	0.001566	0.000709	0.002621	0.001687	0.001953	0.004201	Vulpes_velox	0
53	1	5.33798	402	44.6667	3.37006	1.03509	1	6.0985	0.001075	0.000751	0.000863	0.001874	0.003349	0.003948	0.003715	0.001682	0.005737	0.004009	0.004607	0.010002	Vulpes_zerda	0
54	1	6.8173	391	43.4444	3.27632	1.05697	1	5.64819	0.001013	0.000753	0.000863	0.000963	0.004278	0.005042	0.004745	0.002148	0.006907	0.005132	0.005883	0.006567	Vulpes_chama	0
55	1	12.6	370	41.1111	3.38387	0.978327	1	6.02569	0.001029	0.000761	0.000865	0.001192	0.007906	0.009319	0.00877	0.00397	0.012961	0.009584	0.010899	0.015024	Urocyon_cinereoargenteus	0
56	54	5.46868	375	41.6667	3.47739	0.965075	1	6.76506	0.001093	0.000765	0.000869	0.001826	0.003431	0.004045	0.003806	0.001723	0.00598	0.004183	0.00475	0.009985	Ailuropoda_melanoleuca,Ailurus_fulgens,Aonyx_capensis,Aonyx_cinerea,Bassaricyon_alleni,Bassaricyon_gabbii,Bassariscus_astutus,Bassariscus_sumichrasti,Conepatus_semistriatus,Eira_barbara,Enhydra_lutris,Galictis_cuja,Gulo_gulo,Helarctos_malayanus,Hydrictis_maculicollis,Ictonyx_libyca,Ictonyx_striatus,Lontra_canadensis,Lontra_felina,Lontra_longicaudis,Lutra_lutra,Lutra_sumatrana,Lutrogale_perspicill…	0
57	46	5.35148	381	42.3333	3.71876	0.873976	1	13.7044	0.001055	0.000765	0.000865	0.001659	0.003358	0.003958	0.003725	0.001686	0.005647	0.004092	0.00463	0.00888	Ailurus_fulgens,Aonyx_capensis,Aonyx_cinerea,Bassaricyon_alleni,Bassaricyon_gabbii,Bassariscus_astutus,Bassariscus_sumichrasti,Conepatus_semistriatus,Eira_barbara,Enhydra_lutris,Galictis_cuja,Gulo_gulo,Hydrictis_maculicollis,Ictonyx_libyca,Ictonyx_striatus,Lontra_canadensis,Lontra_felina,Lontra_longicaudis,Lutra_lutra,Lutra_sumatrana,Lutrogale_perspicillata,Martes_americana,Martes_flavigula,Marte…	0
58	42	0.871556	393	43.6667	3.9091	1.13077	1	12.9668	0.001112	0.000761	0.000863	0.001528	0.000547	0.000645	0.000607	0.000275	0.000969	0.000663	0.000752	0.001332	Ailurus_fulgens,Aonyx_capensis,Aonyx_cinerea,Bassaricyon_alleni,Bassaricyon_gabbii,Bassariscus_astutus,Bassariscus_sumichrasti,Eira_barbara,Enhydra_lutris,Galictis_cuja,Gulo_gulo,Hydrictis_maculicollis,Ictonyx_libyca,Ictonyx_striatus,Lontra_canadensis,Lontra_felina,Lontra_longicaudis,Lutra_lutra,Lutra_sumatrana,Lutrogale_perspicillata,Martes_americana,Martes_flavigula,Martes_foina,Martes_martes,M…	0
59	41	4.6932	393	43.6667	3.64114	1.11939	1	11.3166	0.001133	0.00077	0.000859	0.002131	0.002945	0.003471	0.003266	0.001479	0.005315	0.003615	0.004031	0.010001	Aonyx_capensis,Aonyx_cinerea,Bassaricyon_alleni,Bassaricyon_gabbii,Bassariscus_astutus,Bassariscus_sumichrasti,Eira_barbara,Enhydra_lutris,Galictis_cuja,Gulo_gulo,Hydrictis_maculicollis,Ictonyx_libyca,Ictonyx_striatus,Lontra_canadensis,Lontra_felina,Lontra_longicaudis,Lutra_lutra,Lutra_sumatrana,Lutrogale_perspicillata,Martes_americana,Martes_flavigula,Martes_foina,Martes_martes,Martes_pennanti,M…	0
60	9	6.6645	395	43.8889	3.73365	0.9897	1	10.2281	0.001078	0.000767	0.000857	0.00145	0.004182	0.004929	0.004638	0.0021	0.007184	0.005114	0.005715	0.009664	Bassaricyon_alleni,Bassaricyon_gabbii,Bassariscus_astutus,Bassariscus_sumichrasti,Nasua_nasua,Nasuella_olivacea,Potos_flavus,Procyon_cancrivorus,Procyon_lotor	0
61	1	22.707	388	43.1111	3.38286	1.02539	1	9.85051	0.000967	0.000763	0.000855	0.000861	0.014248	0.016794	0.015804	0.007154	0.021952	0.017318	0.01941	0.01956	Potos_flavus	0
62	8	3.16073	402	44.6667	3.70409	1.11098	1	11.3885	0.001055	0.00076	0.000864	0.001352	0.001983	0.002338	0.0022	0.000996	0.003335	0.002403	0.002731	0.004272	Bassaricyon_alleni,Bassaricyon_gabbii,Bassariscus_astutus,Bassariscus_sumichrasti,Nasua_nasua,Nasuella_olivacea,Procyon_cancrivorus,Procyon_lotor	0
63	4	4.65376	409	45.4444	3.43703	1.02068	1	6.15409	0.001082	0.000757	0.000865	0.001263	0.00292	0.003442	0.003239	0.001466	0.005037	0.003524	0.004026	0.005879	Bassariscus_astutus,Bassariscus_sumichrasti,Procyon_cancrivorus,Procyon_lotor	0
64	2	11.4869	422	46.8889	3.67069	1.03639	1	6.87793	0.001169	0.000753	0.000887	0.001395	0.007208	0.008496	0.007995	0.003619	0.013426	0.008654	0.010189	0.016028	Procyon_cancrivorus,Procyon_lotor	0
65	1	3.40564	437	48.5556	4.34015	1.17094	1	14.8622	0.00132	0.000765	0.000895	0.00193	0.002137	0.002519	0.00237	0.001073	0.004497	0.002606	0.003048	0.006572	Procyon_cancrivorus	0
66	1	3.40564	446	49.5556	4.27153	1.00598	1	9.57528	0.001419	0.000774	0.000907	0.002394	0.002137	0.002519	0.00237	0.001073	0.004833	0.002638	0.00309	0.008152	Procyon_lotor	0
67	2	7.5927	421	46.7778	3.83909	0.978618	1	9.2871	0.001129	0.000751	0.000869	0.001436	0.004764	0.005616	0.005285	0.002392	0.008574	0.005699	0.006599	0.010901	Bassariscus_astutus,Bassariscus_sumichrasti	0
68	1	7.29982	423	47	4.05932	1.05674	1	12.1923	0.001213	0.00076	0.000876	0.001909	0.00458	0.005399	0.005081	0.0023	0.008856	0.005546	0.006395	0.013934	Bassariscus_sumichrasti	0
69	1	7.29982	425	47.2222	3.57554	1.00357	1	7.09208	0.001181	0.000763	0.000871	0.001868	0.00458	0.005399	0.005081	0.0023	0.008624	0.005573	0.006362	0.013637	Bassariscus_astutus	0
70	4	4.64628	421	46.7778	3.57182	1.0997	1	8.23667	0.001123	0.000788	0.000873	0.001663	0.002915	0.003436	0.003234	0.001464	0.005218	0.00366	0.004056	0.007727	Bassaricyon_alleni,Bassaricyon_gabbii,Nasua_nasua,Nasuella_olivacea	0
71	2	5.7	437	48.5556	3.84624	1.10092	1	8.89264	0.001276	0.000777	0.000889	0.002201	0.003577	0.004216	0.003967	0.001796	0.007275	0.004429	0.005068	0.012546	Nasua_nasua,Nasuella_olivacea	0
72	1	9.2	429	47.6667	3.61937	1.07813	1	7.98308	0.001211	0.000781	0.000878	0.002755	0.005773	0.006804	0.006403	0.002899	0.011141	0.007184	0.008075	0.025347	Nasua_nasua	0
73	1	9.2	432	48	4.06223	1.09926	1	8.98459	0.001413	0.000801	0.000889	0.003747	0.005773	0.006804	0.006403	0.002899	0.012996	0.00737	0.00818	0.034471	Nasuella_olivacea	0
74	2	6.35743	446	49.5556	4.04951	1.04994	1	9.34297	0.001327	0.000798	0.000894	0.002416	0.003989	0.004702	0.004425	0.002003	0.008439	0.005073	0.005684	0.015359	Bassaricyon_alleni,Bassaricyon_gabbii	0
75	1	8.54257	437	48.5556	3.75269	0.962027	1	7.77543	0.001256	0.000794	0.000889	0.002082	0.00536	0.006318	0.005946	0.002692	0.01073	0.006784	0.007594	0.017782	Bassaricyon_gabbii	0
76	1	8.54257	429	47.6667	3.42119	1.04624	1	7.14341	0.001096	0.000785	0.000877	0.001463	0.00536	0.006318	0.005946	0.002692	0.009363	0.006709	0.007494	0.012499	Bassaricyon_alleni	0
77	32	6.97152	391	43.4444	3.53413	1.09285	1	9.76159	0.001044	0.000755	0.000857	0.001371	0.004374	0.005156	0.004852	0.002197	0.007281	0.005262	0.005973	0.009559	Aonyx_capensis,Aonyx_cinerea,Eira_barbara,Enhydra_lutris,Galictis_cuja,Gulo_gulo,Hydrictis_maculicollis,Ictonyx_libyca,Ictonyx_striatus,Lontra_canadensis,Lontra_felina,Lontra_longicaudis,Lutra_lutra,Lutra_sumatrana,Lutrogale_perspicillata,Martes_americana,Martes_flavigula,Martes_foina,Martes_martes,Martes_pennanti,Meles_meles,Mellivora_capensis,Mustela_africana,Mustela_altaica,Mustela_erminea,Mus…	0
78	31	1e-05	400	44.4444	5.1006	1.15877	1	34.3914	0.001194	0.000774	0.000857	0.002393	0	0	0	0	0	0	0	0	Aonyx_capensis,Aonyx_cinerea,Eira_barbara,Enhydra_lutris,Galictis_cuja,Gulo_gulo,Hydrictis_maculicollis,Ictonyx_libyca,Ictonyx_striatus,Lontra_canadensis,Lontra_felina,Lontra_longicaudis,Lutra_lutra,Lutra_sumatrana,Lutrogale_perspicillata,Martes_americana,Martes_flavigula,Martes_foina,Martes_martes,Martes_pennanti,Meles_meles,Mellivora_capensis,Mustela_africana,Mustela_altaica,Mustela_erminea,Mus…	0
79	30	2	402	44.6667	3.47952	1.04156	1	7.44703	0.001038	0.000756	0.000852	0.001062	0.001255	0.001479	0.001392	0.00063	0.002076	0.001512	0.001703	0.002124	Aonyx_capensis,Aonyx_cinerea,Eira_barbara,Enhydra_lutris,Galictis_cuja,Gulo_gulo,Hydrictis_maculicollis,Ictonyx_libyca,Ictonyx_striatus,Lontra_canadensis,Lontra_felina,Lontra_longicaudis,Lutra_lutra,Lutra_sumatrana,Lutrogale_perspicillata,Martes_americana,Martes_flavigula,Martes_foina,Martes_martes,Martes_pennanti,Meles_meles,Mustela_africana,Mustela_altaica,Mustela_erminea,Mustela_frenata,Mustel…	0
80	29	1e-05	407	45.2222	3.43293	1.06704	1	6.26119	0.001198	0.000756	0.000855	0.002295	0	0	0	0	0	0	0	0	Aonyx_capensis,Aonyx_cinerea,Eira_barbara,Enhydra_lutris,Galictis_cuja,Gulo_gulo,Hydrictis_maculicollis,Ictonyx_libyca,Ictonyx_striatus,Lontra_canadensis,Lontra_felina,Lontra_longicaudis,Lutra_lutra,Lutra_sumatrana,Lutrogale_perspicillata,Martes_americana,Martes_flavigula,Martes_foina,Martes_martes,Martes_pennanti,Mustela_africana,Mustela_altaica,Mustela_erminea,Mustela_frenata,Mustela_lutreola,M…	0
81	7	9.63525	403	44.7778	3.02271	1.00465	1	4.54868	0.000977	0.000754	0.000846	0.000991	0.006046	0.007126	0.006706	0.003036	0.009412	0.00727	0.008151	0.00955	Eira_barbara,Gulo_gulo,Martes_americana,Martes_flavigula,Martes_foina,Martes_martes,Martes_pennanti	0
82	1	10.7648	402	44.6667	3.07118	1.01252	1	4.727	0.000968	0.000746	0.000846	0.00079	0.006754	0.007962	0.007492	0.003392	0.010423	0.008033	0.009107	0.008507	Eira_barbara	0
83	6	0.38495	423	47	4.10208	0.940137	1	18.5249	0.001176	0.000749	0.000855	0.001797	0.000242	0.000285	0.000268	0.000121	0.000453	0.000288	0.000329	0.000692	Gulo_gulo,Martes_americana,Martes_flavigula,Martes_foina,Martes_martes,Martes_pennanti	0
84	5	1.5398	408	45.3333	4.56473	0.446824	1	43.0519	0.001098	0.000741	0.00084	0.002182	0.000966	0.001139	0.001072	0.000485	0.001691	0.001141	0.001294	0.00336	Martes_americana,Martes_flavigula,Martes_foina,Martes_martes,Martes_pennanti	0
85	4	1e-05	422	46.8889	4.08626	0.933481	1	10.8554	0.001258	0.000756	0.000855	0.002194	0	0	0	0	0	0	0	0	Martes_americana,Martes_flavigula,Martes_foina,Martes_martes	0
86	1	8.84	409	45.4444	2.99967	1.02847	1	4.56518	0.000955	0.000749	0.000839	0.000935	0.005547	0.006538	0.006153	0.002785	0.008446	0.006622	0.00742	0.008269	Martes_flavigula	0
87	3	4.68591	424	47.1111	3.95974	1.15277	1	18.3043	0.001117	0.000765	0.000846	0.001996	0.00294	0.003466	0.003261	0.001476	0.005236	0.003584	0.003964	0.009353	Martes_americana,Martes_foina,Martes_martes	0
88	2	0.422679	435	48.3333	3.73059	0.989851	1	7.41102	0.001291	0.000772	0.000858	0.002165	0.000265	0.000313	0.000294	0.000133	0.000546	0.000327	0.000363	0.000915	Martes_americana,Martes_martes	0
89	1	3.73141	427	47.4444	3.30999	0.981892	1	5.76016	0.001076	0.000767	0.000848	0.001619	0.002341	0.00276	0.002597	0.001176	0.004015	0.002864	0.003164	0.006043	Martes_americana	0
90	1	3.73141	428	47.5556	3.89024	0.948657	1	11.2644	0.001167	0.000741	0.000853	0.002255	0.002341	0.00276	0.002597	0.001176	0.004354	0.002767	0.003183	0.008416	Martes_martes	0
91	1	4.15409	426	47.3333	4.24069	0.969309	1	22.3582	0.00112	0.000755	0.000853	0.001499	0.002607	0.003072	0.002891	0.001309	0.004651	0.003135	0.003543	0.006228	Martes_foina	0
92	1	8.84	411	45.6667	3.02766	0.987669	1	5.12452	0.000946	0.000746	0.000843	0.000723	0.005547	0.006538	0.006153	0.002785	0.008358	0.00659	0.007452	0.006395	Martes_pennanti	0
93	1	10.3798	401	44.5556	2.93487	1.02722	1	4.62473	0.000895	0.000754	0.00084	0.000361	0.006513	0.007677	0.007224	0.00327	0.009285	0.007831	0.008721	0.00375	Gulo_gulo	0
94	22	1e-05	415	46.1111	3.93793	1.05979	1	13.0036	0.001197	0.000762	0.000855	0.001913	0	0	0	0	0	0	0	0	Aonyx_capensis,Aonyx_cinerea,Enhydra_lutris,Galictis_cuja,Hydrictis_maculicollis,Ictonyx_libyca,Ictonyx_striatus,Lontra_canadensis,Lontra_felina,Lontra_longicaudis,Lutra_lutra,Lutra_sumatrana,Lutrogale_perspicillata,Mustela_africana,Mustela_altaica,Mustela_erminea,Mustela_frenata,Mustela_lutreola,Mustela_nivalis,Mustela_putorius,Neovison_vison,Pteronura_brasiliensis	0
95	14	6.4	408	45.3333	3.63732	0.985489	1	13.1312	0.001013	0.000765	0.000849	0.00121	0.004016	0.004733	0.004454	0.002016	0.006484	0.004896	0.005437	0.007747	Aonyx_capensis,Aonyx_cinerea,Enhydra_lutris,Galictis_cuja,Hydrictis_maculicollis,Ictonyx_libyca,Ictonyx_striatus,Lontra_canadensis,Lontra_felina,Lontra_longicaudis,Lutra_lutra,Lutra_sumatrana,Lutrogale_perspicillata,Pteronura_brasiliensis	0
96	11	4.4647	407	45.2222	3.28519	0.981366	1	6.03189	0.001042	0.000764	0.000849	0.001782	0.002801	0.003302	0.003107	0.001407	0.004654	0.003411	0.003789	0.007954	Aonyx_capensis,Aonyx_cinerea,Enhydra_lutris,Hydrictis_maculicollis,Lontra_canadensis,Lontra_felina,Lontra_longicaudis,Lutra_lutra,Lutra_sumatrana,Lutrogale_perspicillata,Pteronura_brasiliensis	0
97	1	9.5353	406	45.1111	3.03306	1.00854	1	4.54277	0.000978	0.000759	0.000849	0.001116	0.005983	0.007052	0.006637	0.003004	0.009323	0.007242	0.0081	0.010646	Pteronura_brasiliensis	0
98	10	1.0653	420	46.6667	3.96757	1.14396	1	16.0812	0.001139	0.000759	0.000855	0.001742	0.000668	0.000788	0.000741	0.000336	0.001213	0.000809	0.000911	0.001856	Aonyx_capensis,Aonyx_cinerea,Enhydra_lutris,Hydrictis_maculicollis,Lontra_canadensis,Lontra_felina,Lontra_longicaudis,Lutra_lutra,Lutra_sumatrana,Lutrogale_perspicillata	0
99	7	1e-05	433	48.1111	4.14983	0.991574	1	14.3452	0.001256	0.000767	0.000858	0.002732	0	0	0	0	0	0	0	0	Aonyx_capensis,Aonyx_cinerea,Enhydra_lutris,Hydrictis_maculicollis,Lutra_lutra,Lutra_sumatrana,Lutrogale_perspicillata	0
100	6	3.03449	425	47.2222	3.49021	0.91796	1	11.5753	0.000988	0.00075	0.000855	0.000948	0.001904	0.002244	0.002112	0.000956	0.002997	0.002277	0.002594	0.002876	Aonyx_capensis,Aonyx_cinerea,Hydrictis_maculicollis,Lutra_lutra,Lutra_sumatrana,Lutrogale_perspicillata	0
101	5	0.037812	446	49.5556	3.9747	1.02997	1	12.2004	0.001204	0.000765	0.000863	0.001957	2.4e-05	2.8e-05	2.6e-05	1.2e-05	4.6e-05	2.9e-05	3.3e-05	7.4e-05	Aonyx_capensis,Aonyx_cinerea,Lutra_lutra,Lutra_sumatrana,Lutrogale_perspicillata	0
102	3	1.18724	450	50	3.84977	1.13308	1	10.901	0.001152	0.000736	0.000869	0.001706	0.000745	0.000878	0.000826	0.000374	0.001368	0.000874	0.001031	0.002025	Aonyx_capensis,Aonyx_cinerea,Lutrogale_perspicillata	0
103	2	0.877613	447	49.6667	3.47033	1.04118	1	6.78189	0.001079	0.000746	0.000865	0.001171	0.000551	0.000649	0.000611	0.000277	0.000947	0.000654	0.000759	0.001028	Aonyx_capensis,Aonyx_cinerea	0
104	1	3.33284	445	49.4444	3.52147	0.983495	1	7.30993	0.001095	0.000759	0.000862	0.001471	0.002091	0.002465	0.00232	0.00105	0.00365	0.002529	0.002873	0.004902	Aonyx_cinerea	0
105	1	3.33284	448	49.7778	3.98101	0.95814	1	21.5728	0.001081	0.000738	0.000863	0.001721	0.002091	0.002465	0.00232	0.00105	0.003603	0.002461	0.002876	0.005735	Aonyx_capensis	0
106	1	4.21045	450	50	3.70806	1.0049	1	7.84851	0.001145	0.000748	0.00087	0.001443	0.002642	0.003114	0.00293	0.001327	0.004823	0.003151	0.003663	0.006076	Lutrogale_perspicillata	0
107	2	2.26554	447	49.6667	3.51533	0.98467	1	6.64058	0.00113	0.000736	0.000861	0.001646	0.001422	0.001676	0.001577	0.000714	0.002559	0.001667	0.001951	0.003729	Lutra_lutra,Lutra_sumatrana	0
108	1	3.13216	436	48.4444	3.31542	1.05032	1	6.18283	0.00102	0.000747	0.000859	0.000921	0.001965	0.002317	0.00218	0.000987	0.003194	0.002338	0.002691	0.002884	Lutra_sumatrana	0
109	1	3.13216	440	48.8889	3.51563	1.01222	1	7.52221	0.001057	0.000748	0.000858	0.001347	0.001965	0.002317	0.00218	0.000987	0.003311	0.002344	0.002687	0.00422	Lutra_lutra	0
110	1	5.43551	427	47.4444	3.17858	1.01888	1	5.45531	0.000981	0.000749	0.000853	0.000765	0.003411	0.00402	0.003783	0.001713	0.005334	0.004071	0.004639	0.004157	Hydrictis_maculicollis	0
111	1	8.47	449	49.8889	4.00807	1.0436	1	7.61233	0.001396	0.000763	0.000875	0.002396	0.005315	0.006264	0.005895	0.002669	0.011825	0.006462	0.007415	0.020291	Enhydra_lutris	0
112	3	3.76853	421	46.7778	3.44994	1.0153	1	8.14654	0.001065	0.000761	0.000853	0.001571	0.002365	0.002787	0.002623	0.001187	0.004014	0.002868	0.003215	0.005921	Lontra_canadensis,Lontra_felina,Lontra_longicaudis	0
113	1	4.70147	419	46.5556	3.86921	0.927019	1	13.0885	0.001237	0.000796	0.000848	0.00533	0.00295	0.003477	0.003272	0.001481	0.005818	0.003744	0.003987	0.025057	Lontra_canadensis	0
114	2	2.33605	439	48.7778	3.92335	0.943442	1	13.4219	0.001168	0.000762	0.000862	0.00203	0.001466	0.001728	0.001626	0.000736	0.002728	0.001779	0.002014	0.004743	Lontra_felina,Lontra_longicaudis	0
115	1	2.36542	436	48.4444	3.24699	1.03543	1	5.02269	0.001066	0.000758	0.000863	0.001137	0.001484	0.001749	0.001646	0.000745	0.002521	0.001793	0.002041	0.002689	Lontra_felina	0
116	1	2.36542	438	48.6667	4.04984	1.06468	1	11.8283	0.001257	0.000717	0.000863	0.003269	0.001484	0.001749	0.001646	0.000745	0.002974	0.001696	0.002041	0.007731	Lontra_longicaudis	0
117	3	1e-05	435	48.3333	4.53822	0.944786	1	12.2983	0.001388	0.000771	0.00087	0.002465	0	0	0	0	0	0	0	0	Galictis_cuja,Ictonyx_libyca,Ictonyx_striatus	0
118	1	14	421	46.7778	3.66424	0.978973	1	8.97116	0.001088	0.000764	0.000863	0.001198	0.008784	0.010355	0.009744	0.004411	0.015232	0.010691	0.012082	0.016773	Galictis_cuja	0
119	2	7.30687	451	50.1111	4.91029	1.01212	1	22.3164	0.001486	0.000807	0.000888	0.003657	0.004585	0.005404	0.005086	0.002302	0.010859	0.005894	0.006488	0.026724	Ictonyx_libyca,Ictonyx_striatus	0
120	1	6.69313	466	51.7778	4.91757	1.14974	1	13.8635	0.001681	0.000757	0.0009	0.003892	0.0042	0.00495	0.004658	0.002109	0.01125	0.00507	0.006021	0.026047	Ictonyx_libyca	0
121	1	6.69313	455	50.5556	4.21959	1.10222	1	10.2774	0.001435	0.000798	0.000887	0.003709	0.0042	0.00495	0.004658	0.002109	0.009607	0.005341	0.005937	0.024822	Ictonyx_striatus	0
122	8	12.085	410	45.5556	3.50209	1.04982	1	9.02952	0.001011	0.000776	0.000854	0.001223	0.007583	0.008938	0.008411	0.003808	0.012223	0.009381	0.010324	0.014774	Mustela_africana,Mustela_altaica,Mustela_erminea,Mustela_frenata,Mustela_lutreola,Mustela_nivalis,Mustela_putorius,Neovison_vison	0
123	3	1.82762	466	51.7778	5.99743	1.21709	1	22.0218	0.001787	0.000784	0.0009	0.003206	0.001147	0.001352	0.001272	0.000576	0.003267	0.001433	0.001644	0.005859	Mustela_africana,Mustela_frenata,Neovison_vison	0
124	2	0.920686	455	50.5556	5.07487	1.05575	1	17.048	0.0015	0.000758	0.000891	0.002951	0.000578	0.000681	0.000641	0.00029	0.001381	0.000698	0.00082	0.002717	Mustela_africana,Mustela_frenata	0
125	1	5.56667	446	49.5556	4.35297	0.868208	1	14.7408	0.001318	0.00077	0.000875	0.002634	0.003493	0.004117	0.003874	0.001754	0.007339	0.004284	0.004874	0.014663	Mustela_africana	0
126	1	5.56667	439	48.7778	4.12053	0.950685	1	14.7742	0.001159	0.000761	0.000873	0.001348	0.003493	0.004117	0.003874	0.001754	0.006451	0.004236	0.00486	0.007507	Mustela_frenata	0
127	1	6.48735	428	47.5556	3.89795	0.868029	1	16.5733	0.0011	0.000743	0.000862	0.001972	0.004071	0.004798	0.004515	0.002044	0.007137	0.004821	0.005593	0.012794	Neovison_vison	0
128	5	2.69878	473	52.5556	5.88295	1.09682	1	16.0886	0.00182	0.000775	0.000915	0.003547	0.001693	0.001996	0.001878	0.00085	0.004911	0.002092	0.002469	0.009573	Mustela_altaica,Mustela_erminea,Mustela_lutreola,Mustela_nivalis,Mustela_putorius	0
129	4	0.644139	452	50.2222	4.22906	0.991716	1	10.197	0.001309	0.000766	0.000889	0.002072	0.000404	0.000476	0.000448	0.000203	0.000843	0.000493	0.000573	0.001335	Mustela_altaica,Mustela_lutreola,Mustela_nivalis,Mustela_putorius	0
130	2	0.8132	467	51.8889	4.795	0.883093	1	18.1415	0.001513	0.000794	0.000907	0.002831	0.00051	0.000601	0.000566	0.000256	0.00123	0.000646	0.000738	0.002302	Mustela_altaica,Mustela_nivalis	0
131	1	4.15886	448	49.7778	3.62102	1.02394	1	6.45387	0.001148	0.00077	0.000889	0.00114	0.00261	0.003076	0.002895	0.00131	0.004773	0.003203	0.003697	0.004741	Mustela_nivalis	0
132	1	4.15886	459	51	4.44727	0.911044	1	12.2637	0.001324	0.000793	0.000899	0.001927	0.00261	0.003076	0.002895	0.00131	0.005508	0.003298	0.003737	0.008016	Mustela_altaica	0
133	2	3.11206	461	51.2222	4.37902	1.09093	1	14.5628	0.001385	0.000834	0.000899	0.005129	0.001953	0.002302	0.002166	0.000981	0.004309	0.002596	0.002796	0.015962	Mustela_lutreola,Mustela_putorius	0
134	1	1.86	471	52.3333	4.22207	0.989945	1	10.7914	0.001307	0.000773	0.000909	0.001806	0.001167	0.001376	0.001295	0.000586	0.002432	0.001438	0.001691	0.003359	Mustela_putorius	0
135	1	1.86	471	52.3333	4.51739	1.07393	1	9.61126	0.001509	0.000757	0.000913	0.002546	0.001167	0.001376	0.001295	0.000586	0.002807	0.001408	0.001698	0.004736	Mustela_lutreola	0
136	1	5.6162	424	47.1111	4.34809	1.0675	1	17.3409	0.001187	0.000758	0.000872	0.002422	0.003524	0.004154	0.003909	0.00177	0.006667	0.004256	0.004897	0.0136	Mustela_erminea	0
137	1	20.4	397	44.1111	3.15055	1.02217	1	5.3469	0.000974	0.000746	0.000849	0.000976	0.0128	0.015088	0.014198	0.006427	0.019868	0.015221	0.017313	0.019912	Meles_meles	0
138	1	22.4	386	42.8889	3.00515	1.03171	1	4.51432	0.000927	0.000763	0.000847	0.000631	0.014055	0.016567	0.01559	0.007058	0.020771	0.017094	0.018973	0.014131	Mellivora_capensis	0
139	1	22.4	388	43.1111	3.35872	0.991061	1	6.89762	0.001036	0.000744	0.000854	0.001628	0.014055	0.016567	0.01559	0.007058	0.023205	0.01667	0.01913	0.036468	Taxidea_taxus	0
140	1	34.0647	374	41.5556	3.85123	1.12841	1	12.1522	0.001028	0.000772	0.000861	0.00139	0.021374	0.025195	0.023709	0.010733	0.03503	0.026298	0.02932	0.047348	Ailurus_fulgens	0
141	4	15.4853	421	46.7778	4.47636	1.05682	1	13.2899	0.001324	0.000765	0.000897	0.001913	0.009716	0.011453	0.010778	0.004879	0.020501	0.011842	0.013885	0.029619	Conepatus_semistriatus,Mephitis_macroura,Mephitis_mephitis,Mydaus_javanensis	0
142	1	19.451	420	46.6667	4.32932	1.08563	1	11.9642	0.001364	0.00077	0.000898	0.002216	0.012205	0.014386	0.013538	0.006128	0.026538	0.014987	0.017464	0.043102	Mydaus_javanensis	0
143	3	8.08906	424	47.1111	4.5279	1.41825	1	27.8805	0.001195	0.000759	0.000889	0.001711	0.005076	0.005983	0.00563	0.002549	0.009665	0.006137	0.007191	0.013844	Conepatus_semistriatus,Mephitis_macroura,Mephitis_mephitis	0
144	2	8.19024	449	49.8889	4.54651	0.978684	1	11.8686	0.001491	0.000782	0.000911	0.002662	0.005139	0.006058	0.0057	0.002581	0.012214	0.006408	0.007462	0.021799	Mephitis_macroura,Mephitis_mephitis	0
145	1	3.17171	452	50.2222	5.66984	0.963692	1	16.8052	0.001738	0.000792	0.000932	0.003296	0.00199	0.002346	0.002208	0.000999	0.005512	0.002511	0.002958	0.010455	Mephitis_mephitis	0
146	1	3.17171	438	48.6667	4.31522	1.03236	1	13.4605	0.001336	0.000774	0.0009	0.00221	0.00199	0.002346	0.002208	0.000999	0.004237	0.002454	0.002855	0.00701	Mephitis_macroura	0
147	1	11.3619	425	47.2222	3.62816	1.0287	1	6.06607	0.001182	0.00075	0.000894	0.001279	0.007129	0.008403	0.007908	0.00358	0.01343	0.008524	0.010158	0.014537	Conepatus_semistriatus	0
148	8	15.819	414	46	4.69936	1.20477	1	28.7799	0.001277	0.00077	0.000896	0.003365	0.009926	0.0117	0.01101	0.004984	0.020197	0.01218	0.014166	0.053229	Ailuropoda_melanoleuca,Helarctos_malayanus,Melursus_ursinus,Tremarctos_ornatus,Ursus_americanus,Ursus_arctos,Ursus_maritimus,Ursus_thibetanus	0
149	1	24.4687	423	47	4.44219	1.03348	1	16.8884	0.001312	0.000775	0.000904	0.002175	0.015353	0.018097	0.01703	0.007709	0.032094	0.018954	0.02212	0.053231	Ailuropoda_melanoleuca	0
150	7	8.9522	498	55.3333	5.61765	1.19242	1.48906	17.4552	0.001744	0.000819	0.000995	0.003373	0.005617	0.006621	0.006231	0.002821	0.01561	0.007335	0.008907	0.030191	Helarctos_malayanus,Melursus_ursinus,Tremarctos_ornatus,Ursus_americanus,Ursus_arctos,Ursus_maritimus,Ursus_thibetanus	0
151	6	8.79506	568	63.1111	6.10494	1.15448	2.54043	13.7368	0.001968	0.000918	0.00112	0.002489	0.005519	0.006505	0.006121	0.002771	0.017309	0.008074	0.009853	0.021891	Helarctos_malayanus,Melursus_ursinus,Ursus_americanus,Ursus_arctos,Ursus_maritimus,Ursus_thibetanus	0
152	5	0.476805	643	71.4444	11.2211	2.01338	3.44938	60.8552	0.003144	0.000969	0.001314	0.006544	0.000299	0.000353	0.000332	0.00015	0.001499	0.000462	0.000627	0.00312	Helarctos_malayanus,Ursus_americanus,Ursus_arctos,Ursus_maritimus,Ursus_thibetanus	0
153	3	0.095484	670	74.4444	10.6983	1.83252	3.81565	36.2703	0.003598	0.001099	0.001448	0.007337	6e-05	7.1e-05	6.6e-05	3e-05	0.000344	0.000105	0.000138	0.000701	Helarctos_malayanus,Ursus_americanus,Ursus_thibetanus	0
154	2	0.903146	685	76.1111	9.06134	1.6998	3.83537	19.3968	0.00327	0.001025	0.001507	0.005162	0.000567	0.000668	0.000629	0.000285	0.002953	0.000926	0.001361	0.004662	Ursus_americanus,Ursus_thibetanus	0
155	1	5.24604	681	75.6667	8.89633	1.55	3.83341	19.6623	0.003094	0.001046	0.001448	0.004384	0.003292	0.00388	0.003651	0.001653	0.016229	0.00549	0.007599	0.022997	Ursus_thibetanus	0
156	1	5.24604	681	75.6667	9.83767	1.65688	3.83341	29.6719	0.003229	0.001062	0.001495	0.005118	0.003292	0.00388	0.003651	0.001653	0.016938	0.005571	0.007845	0.026851	Ursus_americanus	0
157	1	6.14919	729	81	14.3974	2.50286	4.74936	68.1729	0.004741	0.001317	0.00239	0.018856	0.003858	0.004548	0.00428	0.001937	0.029155	0.008099	0.014699	0.115951	Helarctos_malayanus	0
158	2	5.07618	640	71.1111	8.11962	1.4248	3.32995	20.4594	0.002645	0.001022	0.001279	0.004013	0.003185	0.003754	0.003533	0.001599	0.013425	0.00519	0.006494	0.020373	Ursus_arctos,Ursus_maritimus	0
159	1	1.16849	663	73.6667	8.91948	1.29023	3.58634	23.5495	0.003081	0.001088	0.001347	0.007024	0.000733	0.000864	0.000813	0.000368	0.003601	0.001272	0.001574	0.008207	Ursus_arctos	0
160	1	1.16849	658	73.1111	8.44667	1.48883	3.61721	17.8382	0.002902	0.00103	0.001349	0.00395	0.000733	0.000864	0.000813	0.000368	0.003391	0.001204	0.001576	0.004616	Ursus_maritimus	0
161	1	6.72148	623	69.2222	9.23095	1.52793	3.49226	24.0701	0.003054	0.000986	0.001278	0.00466	0.004217	0.004971	0.004678	0.002118	0.02053	0.006628	0.008591	0.031321	Melursus_ursinus	0
162	1	15.5165	487	54.1111	5.15123	1.15138	1.38167	13.0937	0.00174	0.000786	0.000987	0.004677	0.009736	0.011476	0.0108	0.004889	0.026992	0.012188	0.015315	0.072566	Tremarctos_ornatus	0
163	84	8.04343	375	41.6667	3.73168	0.966853	1	9.7408	0.0011	0.000752	0.000864	0.001632	0.005047	0.005949	0.005598	0.002534	0.008845	0.006051	0.00695	0.013127	Acinonyx_jubatus,Arctictis_binturong,Arctogalidia_trivirgata,Bdeogale_crassicauda,Caracal_aurata,Caracal_caracal,Civettictis_civetta,Crocuta_crocuta,Crossarchus_platycephalus,Cryptoprocta_ferox,Cynictis_penicillata,Cynogale_bennettii,Dinofelis_cristata,Eupleres_goudotii,FAM_62192,Felis_catus,Felis_chaus,Felis_margarita,Felis_nigripes,Felis_silvestris,Fossa_fossana,Galerella_pulverulenta,Galidia_e…	0
164	1	46.9168	366	40.6667	3.141	1.01484	1	4.94836	0.00097	0.000748	0.000861	0.001068	0.029438	0.0347	0.032654	0.014782	0.045521	0.035071	0.040395	0.050124	Nandinia_binotata	0
165	83	6.21678	383	42.5556	3.78274	1.00865	1	7.75732	0.001148	0.000744	0.000868	0.001684	0.003901	0.004598	0.004327	0.001959	0.00714	0.004623	0.005397	0.010471	Acinonyx_jubatus,Arctictis_binturong,Arctogalidia_trivirgata,Bdeogale_crassicauda,Caracal_aurata,Caracal_caracal,Civettictis_civetta,Crocuta_crocuta,Crossarchus_platycephalus,Cryptoprocta_ferox,Cynictis_penicillata,Cynogale_bennettii,Dinofelis_cristata,Eupleres_goudotii,FAM_62192,Felis_catus,Felis_chaus,Felis_margarita,Felis_nigripes,Felis_silvestris,Fossa_fossana,Galerella_pulverulenta,Galidia_e…	0
166	34	1e-05	395	43.8889	3.52512	0.964968	1	6.40559	0.00117	0.000731	0.000865	0.00201	0	0	0	0	0	0	0	0	Arctictis_binturong,Arctogalidia_trivirgata,Bdeogale_crassicauda,Civettictis_civetta,Crocuta_crocuta,Crossarchus_platycephalus,Cryptoprocta_ferox,Cynictis_penicillata,Cynogale_bennettii,Eupleres_goudotii,Fossa_fossana,Galerella_pulverulenta,Galidia_elegans,Genetta_genetta,Genetta_tigrina,Herpestes_auropunctatus,Herpestes_edwardsii,Herpestes_fuscus,Herpestes_ichneumon,Hyaena_hyaena,Ichneumia_albic…	0
167	20	7.79351	390	43.3333	3.47061	1.01702	1	7.1178	0.001058	0.000738	0.000861	0.001211	0.00489	0.005764	0.005424	0.002456	0.008249	0.005754	0.00671	0.00944	Bdeogale_crassicauda,Crocuta_crocuta,Crossarchus_platycephalus,Cryptoprocta_ferox,Cynictis_penicillata,Eupleres_goudotii,Fossa_fossana,Galerella_pulverulenta,Galidia_elegans,Herpestes_auropunctatus,Herpestes_edwardsii,Herpestes_fuscus,Herpestes_ichneumon,Hyaena_hyaena,Ichneumia_albicauda,Mungos_mungo,Parahyaena_brunnea,Proteles_cristatus,Rhynchogale_melleri,Salanoia_concolor	0
168	16	6.26137	405	45	3.45567	1.03047	1	5.26522	0.00119	0.00074	0.000868	0.001684	0.003929	0.004631	0.004358	0.001973	0.00745	0.004633	0.005435	0.010545	Bdeogale_crassicauda,Crossarchus_platycephalus,Cryptoprocta_ferox,Cynictis_penicillata,Eupleres_goudotii,Fossa_fossana,Galerella_pulverulenta,Galidia_elegans,Herpestes_auropunctatus,Herpestes_edwardsii,Herpestes_fuscus,Herpestes_ichneumon,Ichneumia_albicauda,Mungos_mungo,Rhynchogale_melleri,Salanoia_concolor	0
169	11	6.81178	397	44.1111	3.37748	1.01431	1	5.94391	0.001054	0.000735	0.000863	0.001344	0.004274	0.005038	0.004741	0.002146	0.007183	0.005007	0.005879	0.009158	Bdeogale_crassicauda,Crossarchus_platycephalus,Cynictis_penicillata,Galerella_pulverulenta,Herpestes_auropunctatus,Herpestes_edwardsii,Herpestes_fuscus,Herpestes_ichneumon,Ichneumia_albicauda,Mungos_mungo,Rhynchogale_melleri	0
170	10	3.61639	397	44.1111	3.36857	0.898752	1	9.62771	0.000999	0.000747	0.000857	0.001245	0.002269	0.002675	0.002517	0.001139	0.003612	0.002703	0.003097	0.004503	Bdeogale_crassicauda,Crossarchus_platycephalus,Cynictis_penicillata,Herpestes_auropunctatus,Herpestes_edwardsii,Herpestes_fuscus,Herpestes_ichneumon,Ichneumia_albicauda,Mungos_mungo,Rhynchogale_melleri	0
171	2	3.45194	423	47	3.95146	1.08208	1	8.80586	0.001226	0.000758	0.000875	0.002035	0.002166	0.002553	0.002403	0.001088	0.004234	0.002617	0.003022	0.007024	Crossarchus_platycephalus,Mungos_mungo	0
172	1	12.765	424	47.1111	4.0482	0.972417	1	9.99625	0.001189	0.000757	0.000876	0.001486	0.00801	0.009441	0.008884	0.004022	0.015182	0.009668	0.011182	0.018964	Mungos_mungo	0
173	1	12.765	418	46.4444	3.95891	1.04681	1	10.5299	0.001198	0.000741	0.000865	0.002308	0.00801	0.009441	0.008884	0.004022	0.01529	0.009457	0.011042	0.029467	Crossarchus_platycephalus	0
174	8	0.816945	420	46.6667	3.45091	1.00051	1	6.17464	0.001146	0.000752	0.000862	0.001733	0.000513	0.000604	0.000569	0.000257	0.000936	0.000615	0.000704	0.001416	Bdeogale_crassicauda,Cynictis_penicillata,Herpestes_auropunctatus,Herpestes_edwardsii,Herpestes_fuscus,Herpestes_ichneumon,Ichneumia_albicauda,Rhynchogale_melleri	0
175	6	1e-05	422	46.8889	3.60771	0.995956	1	7.9186	0.001096	0.000764	0.000864	0.001935	0	0	0	0	0	0	0	0	Bdeogale_crassicauda,Cynictis_penicillata,Herpestes_auropunctatus,Herpestes_edwardsii,Herpestes_fuscus,Herpestes_ichneumon	0
176	2	2.1	435	48.3333	3.43022	1.02365	1	6.10339	0.001109	0.000756	0.000866	0.001284	0.001318	0.001553	0.001462	0.000662	0.002328	0.001587	0.001819	0.002695	Bdeogale_crassicauda,Cynictis_penicillata	0
177	1	13.3	435	48.3333	3.26494	0.998502	1	5.22202	0.001048	0.000747	0.000865	0.001232	0.008345	0.009837	0.009257	0.00419	0.013933	0.009929	0.011505	0.016388	Cynictis_penicillata	0
178	1	13.3	426	47.3333	3.05041	1.01942	1	4.56149	0.00096	0.000752	0.000861	0.000704	0.008345	0.009837	0.009257	0.00419	0.012768	0.010001	0.011451	0.009361	Bdeogale_crassicauda	0
179	4	1e-05	438	48.6667	4.19895	0.966548	1	13.4349	0.001309	0.000735	0.000867	0.002588	0	0	0	0	0	0	0	0	Herpestes_auropunctatus,Herpestes_edwardsii,Herpestes_fuscus,Herpestes_ichneumon	0
180	1	15.4	437	48.5556	3.40421	1.04092	1	5.40759	0.001138	0.000742	0.00087	0.001603	0.009663	0.01139	0.010718	0.004852	0.017531	0.011425	0.013406	0.02468	Herpestes_ichneumon	0
181	3	6.65333	434	48.2222	3.43117	1.01538	1	8.14351	0.001032	0.000743	0.000863	0.001084	0.004175	0.004921	0.004631	0.002096	0.006869	0.004941	0.005742	0.007209	Herpestes_auropunctatus,Herpestes_edwardsii,Herpestes_fuscus	0
182	2	4.34667	445	49.4444	3.70256	0.978053	1	8.52699	0.001169	0.000744	0.000867	0.001837	0.002727	0.003215	0.003025	0.00137	0.00508	0.003235	0.003771	0.007985	Herpestes_auropunctatus,Herpestes_edwardsii	0
183	1	4.4	441	49	3.49563	0.962243	1	8.15213	0.001086	0.000738	0.000861	0.001318	0.002761	0.003254	0.003062	0.001386	0.004781	0.003247	0.003788	0.005798	Herpestes_auropunctatus	0
184	1	4.4	446	49.5556	3.70694	1.02989	1	9.5164	0.001149	0.00074	0.000865	0.001706	0.002761	0.003254	0.003062	0.001386	0.005056	0.003255	0.003806	0.007508	Herpestes_edwardsii	0
185	1	8.74667	432	48	3.55373	0.986708	1	8.89809	0.001072	0.000743	0.000858	0.001323	0.005488	0.006469	0.006088	0.002756	0.009377	0.006495	0.007508	0.011576	Herpestes_fuscus	0
186	2	2.0125	429	47.6667	3.85287	1.13295	1	11.6659	0.001225	0.000759	0.000862	0.002243	0.001263	0.001488	0.001401	0.000634	0.002464	0.001527	0.001735	0.004514	Ichneumia_albicauda,Rhynchogale_melleri	0
187	1	13.3875	420	46.6667	3.58202	1.11108	1	12.2873	0.000992	0.000733	0.000852	0.000973	0.0084	0.009902	0.009318	0.004218	0.013275	0.009814	0.011402	0.01302	Ichneumia_albicauda	0
188	1	13.3875	421	46.7778	3.50621	1.02499	1	10.7816	0.00101	0.000745	0.000851	0.001087	0.0084	0.009902	0.009318	0.004218	0.013523	0.009969	0.011392	0.014549	Rhynchogale_melleri	0
189	1	19.8333	393	43.6667	3.39193	1.02651	1	9.87004	0.001044	0.000767	0.000863	0.00195	0.012445	0.014669	0.013804	0.006249	0.020701	0.015217	0.017116	0.038682	Galerella_pulverulenta	0
190	5	3.04512	414	46	4.15526	0.951141	1	11.6705	0.001266	0.000776	0.000877	0.002737	0.001911	0.002252	0.002119	0.000959	0.003856	0.002362	0.002669	0.008335	Cryptoprocta_ferox,Eupleres_goudotii,Fossa_fossana,Galidia_elegans,Salanoia_concolor	0
191	3	1e-05	438	48.6667	4.58817	1.01755	1	13.067	0.001458	0.000786	0.000879	0.003355	0	0	0	0	0	0	0	0	Cryptoprocta_ferox,Galidia_elegans,Salanoia_concolor	0
192	1	23.6	428	47.5556	3.66401	0.998836	1	8.6954	0.00111	0.000747	0.000867	0.001419	0.014808	0.017455	0.016426	0.007436	0.026199	0.017635	0.020473	0.033486	Cryptoprocta_ferox	0
193	2	11.1233	437	48.5556	4.11314	1.10811	1	11.9712	0.001225	0.000767	0.000869	0.002004	0.006979	0.008227	0.007742	0.003505	0.013629	0.008531	0.009662	0.022291	Galidia_elegans,Salanoia_concolor	0
194	1	12.4767	438	48.6667	4.19731	0.944239	1	12.2349	0.001194	0.000765	0.00087	0.001628	0.007829	0.009228	0.008684	0.003931	0.014898	0.009539	0.010861	0.020312	Galidia_elegans	0
195	1	12.4767	437	48.5556	4.97873	1.01259	1	27.3785	0.001312	0.000737	0.00087	0.00253	0.007829	0.009228	0.008684	0.003931	0.016367	0.009192	0.010861	0.031569	Salanoia_concolor	0
196	2	13.55	532	59.1111	7.2323	1.26267	1.77308	16.5656	0.002416	0.000842	0.001032	0.00349	0.008502	0.010022	0.009431	0.004269	0.032733	0.01141	0.01398	0.047286	Eupleres_goudotii,Fossa_fossana	0
197	1	10.05	560	62.2222	8.80303	1.17359	2.50799	25.3015	0.002927	0.000898	0.001087	0.004782	0.006306	0.007433	0.006995	0.003166	0.029417	0.009021	0.010927	0.048061	Fossa_fossana	0
198	1	10.05	737	81.8889	19.8117	2.0866	8.34425	47.5968	0.006544	0.001346	0.004332	0.007183	0.006306	0.007433	0.006995	0.003166	0.065771	0.013524	0.043534	0.072187	Eupleres_goudotii	0
199	4	23.9765	452	50.2222	5.37433	0.999449	1	12.477	0.001747	0.000761	0.000914	0.002853	0.015044	0.017733	0.016688	0.007554	0.041886	0.018237	0.021926	0.068398	Crocuta_crocuta,Hyaena_hyaena,Parahyaena_brunnea,Proteles_cristatus	0
200	3	1e-05	476	52.8889	7.73841	1.03317	1	40.4536	0.002252	0.000727	0.000931	0.004535	0	0	0	0	0	0	0	0	Crocuta_crocuta,Hyaena_hyaena,Parahyaena_brunnea	0
201	1	8.93	467	51.8889	6.4596	1.36693	1	38.8697	0.001791	0.000744	0.000914	0.003188	0.005603	0.006605	0.006215	0.002814	0.01599	0.006648	0.008166	0.028468	Crocuta_crocuta	0
202	2	2.5875	465	51.6667	8.36991	1.22502	1	48.5716	0.002024	0.000763	0.000923	0.00417	0.001624	0.001914	0.001801	0.000815	0.005237	0.001973	0.002389	0.010789	Hyaena_hyaena,Parahyaena_brunnea	0
203	1	6.3425	467	51.8889	7.7185	1.42624	1	47.2013	0.001888	0.000724	0.000916	0.004018	0.00398	0.004691	0.004414	0.001998	0.011975	0.00459	0.005811	0.025486	Hyaena_hyaena	0
204	1	6.3425	463	51.4444	7.52283	1.29299	1	42.8829	0.001853	0.000743	0.000918	0.003464	0.00398	0.004691	0.004414	0.001998	0.011753	0.004712	0.00582	0.021972	Parahyaena_brunnea	0
205	1	8.93	879	97.6667	36.3856	11.2005	16.2821	62.2226	0.011803	0.007912	0.009942	0.008788	0.005603	0.006605	0.006215	0.002814	0.105402	0.070654	0.088784	0.078474	Proteles_cristatus	1
206	14	0.701622	391	43.4444	4.00319	1.11293	1	12.8533	0.001146	0.000744	0.000862	0.001933	0.00044	0.000519	0.000488	0.000221	0.000804	0.000522	0.000605	0.001357	Arctictis_binturong,Arctogalidia_trivirgata,Civettictis_civetta,Cynogale_bennettii,Genetta_genetta,Genetta_tigrina,Macrogalidia_musschenbroekii,Paguma_larvata,Paradoxurus_hermaphroditus,Prionodon_linsang,Viverra_megaspila,Viverra_tangalunga,Viverra_zibetha,Viverricula_indica	0
207	1	39.9984	381	42.3333	3.18668	1.01985	1	5.69619	0.000977	0.000737	0.000852	0.001039	0.025097	0.029583	0.027839	0.012602	0.039087	0.029476	0.034065	0.041568	Prionodon_linsang	0
208	13	13.1541	387	43	3.44871	0.99589	1	8.43415	0.000975	0.000759	0.000857	0.000879	0.008254	0.009729	0.009155	0.004144	0.01282	0.009983	0.01128	0.011557	Arctictis_binturong,Arctogalidia_trivirgata,Civettictis_civetta,Cynogale_bennettii,Genetta_genetta,Genetta_tigrina,Macrogalidia_musschenbroekii,Paguma_larvata,Paradoxurus_hermaphroditus,Viverra_megaspila,Viverra_tangalunga,Viverra_zibetha,Viverricula_indica	0
209	6	3.93679	405	45	3.62778	1.10523	1	9.91825	0.001129	0.000763	0.000863	0.002093	0.00247	0.002912	0.00274	0.00124	0.004445	0.003004	0.003397	0.008239	Arctictis_binturong,Arctogalidia_trivirgata,Cynogale_bennettii,Macrogalidia_musschenbroekii,Paguma_larvata,Paradoxurus_hermaphroditus	0
210	1	22.9075	396	44	3.32925	1.09129	1	10.3275	0.000978	0.000731	0.000859	0.00133	0.014374	0.016943	0.015944	0.007217	0.022392	0.016739	0.019675	0.030477	Cynogale_bennettii	0
211	5	3.04083	417	46.3333	3.54459	1.03189	1	5.79873	0.001157	0.000745	0.000868	0.001485	0.001908	0.002249	0.002116	0.000958	0.003517	0.002266	0.002639	0.004515	Arctictis_binturong,Arctogalidia_trivirgata,Macrogalidia_musschenbroekii,Paguma_larvata,Paradoxurus_hermaphroditus	0
212	1	19.8667	407	45.2222	3.26495	0.982002	1	5.39851	0.001009	0.000742	0.000865	0.000995	0.012466	0.014694	0.013827	0.006259	0.020052	0.014745	0.017185	0.019766	Arctogalidia_trivirgata	0
213	4	6.23333	425	47.2222	3.74246	0.958173	1	9.07721	0.001163	0.000737	0.00087	0.001741	0.003911	0.00461	0.004338	0.001964	0.007251	0.004592	0.005426	0.010854	Arctictis_binturong,Macrogalidia_musschenbroekii,Paguma_larvata,Paradoxurus_hermaphroditus	0
214	3	3.14083	443	49.2222	4.28547	1.09575	1	12.1022	0.001241	0.000741	0.000893	0.001931	0.001971	0.002323	0.002186	0.00099	0.003899	0.002328	0.002804	0.006066	Macrogalidia_musschenbroekii,Paguma_larvata,Paradoxurus_hermaphroditus	0
215	2	1.6925	467	51.8889	4.4965	1.0734	1	10.3052	0.001541	0.000805	0.000932	0.004378	0.001062	0.001252	0.001178	0.000533	0.002608	0.001363	0.001577	0.007409	Macrogalidia_musschenbroekii,Paradoxurus_hermaphroditus	0
216	1	8.8	501	55.6667	5.63011	1.01042	1.30074	14.8234	0.001838	0.000771	0.000982	0.003003	0.005522	0.006509	0.006125	0.002773	0.016178	0.006787	0.008637	0.026428	Paradoxurus_hermaphroditus	0
217	1	8.8	483	53.6667	5.53145	1.08158	1.053	13.3239	0.001872	0.000772	0.000956	0.004469	0.005522	0.006509	0.006125	0.002773	0.016472	0.006795	0.008413	0.039328	Macrogalidia_musschenbroekii	0
218	1	10.4925	435	48.3333	3.52135	0.991866	1	7.04866	0.001104	0.000752	0.000882	0.001432	0.006584	0.00776	0.007303	0.003306	0.011582	0.007894	0.009249	0.015028	Paguma_larvata	0
219	1	13.6333	413	45.8889	3.8923	0.917446	1	14.5749	0.001165	0.000728	0.000865	0.003348	0.008554	0.010083	0.009489	0.004295	0.015877	0.009922	0.011795	0.045639	Arctictis_binturong	0
220	7	2.93629	411	45.6667	3.42722	1.05229	1	5.9286	0.001135	0.000749	0.000863	0.001825	0.001842	0.002172	0.002044	0.000925	0.003332	0.002199	0.002534	0.005358	Civettictis_civetta,Genetta_genetta,Genetta_tigrina,Viverra_megaspila,Viverra_tangalunga,Viverra_zibetha,Viverricula_indica	0
221	2	17.908	416	46.2222	3.84687	0.978065	1	9.32096	0.001181	0.000754	0.000868	0.002208	0.011237	0.013245	0.012464	0.005642	0.021152	0.013498	0.015544	0.039546	Genetta_genetta,Genetta_tigrina	0
222	1	6	430	47.7778	4.12885	1.01323	1	9.66724	0.001223	0.000745	0.000879	0.001694	0.003765	0.004438	0.004176	0.00189	0.007336	0.004469	0.005274	0.010167	Genetta_tigrina	0
223	1	6	442	49.1111	4.53572	1.05406	1	14.0656	0.001303	0.000766	0.000898	0.001812	0.003765	0.004438	0.004176	0.00189	0.007821	0.004594	0.005388	0.010873	Genetta_genetta	0
224	5	9.418	418	46.4444	3.38907	0.997997	1	6.35257	0.001086	0.00074	0.000859	0.001592	0.005909	0.006966	0.006555	0.002967	0.010227	0.006974	0.008089	0.014991	Civettictis_civetta,Viverra_megaspila,Viverra_tangalunga,Viverra_zibetha,Viverricula_indica	0
225	4	2.13667	431	47.8889	3.59739	0.951202	1	8.11349	0.001113	0.000745	0.000857	0.001418	0.001341	0.00158	0.001487	0.000673	0.002379	0.001591	0.00183	0.00303	Civettictis_civetta,Viverra_megaspila,Viverra_tangalunga,Viverra_zibetha	0
226	3	7.48667	440	48.8889	3.13413	0.976608	1	5.05018	0.000972	0.000734	0.000844	0.000902	0.004698	0.005537	0.005211	0.002359	0.007275	0.005498	0.006319	0.006756	Viverra_megaspila,Viverra_tangalunga,Viverra_zibetha	0
227	1	4.86667	436	48.4444	3.4328	1.01754	1	7.91155	0.001039	0.000748	0.000844	0.001524	0.003054	0.003599	0.003387	0.001533	0.005055	0.003641	0.00411	0.007414	Viverra_tangalunga	0
228	2	0.98	461	51.2222	3.57564	0.98994	1	6.10872	0.00123	0.000754	0.000859	0.002303	0.000615	0.000725	0.000682	0.000309	0.001206	0.000739	0.000842	0.002257	Viverra_megaspila,Viverra_zibetha	0
229	1	3.88667	442	49.1111	3.19031	1.0044	1	4.92638	0.001041	0.000753	0.000849	0.001168	0.002439	0.002875	0.002705	0.001225	0.004046	0.002925	0.0033	0.004539	Viverra_zibetha	0
230	1	3.88667	442	49.1111	3.2052	0.97704	1	5.37545	0.001002	0.000754	0.000847	0.001089	0.002439	0.002875	0.002705	0.001225	0.003894	0.00293	0.003294	0.004232	Viverra_megaspila	0
231	1	12.3533	425	47.2222	3.26451	0.972418	1	6.04517	0.001055	0.000766	0.000849	0.001769	0.007751	0.009137	0.008598	0.003892	0.013036	0.009466	0.010494	0.021854	Civettictis_civetta	0
232	1	14.49	416	46.2222	3.14251	1.0043	1	4.95087	0.000973	0.000743	0.000852	0.000795	0.009092	0.010717	0.010085	0.004565	0.014095	0.010773	0.012341	0.011521	Viverricula_indica	0
233	49	7.7	447	49.6667	3.80023	1.0473	1	8.37438	0.001178	0.000759	0.000943	0.001242	0.004831	0.005695	0.005359	0.002426	0.009072	0.005844	0.007259	0.009561	Acinonyx_jubatus,Caracal_aurata,Caracal_caracal,Dinofelis_cristata,FAM_62192,Felis_catus,Felis_chaus,Felis_margarita,Felis_nigripes,Felis_silvestris,Homotherium_crusafonti,Homotherium_nestianus,Hyperailurictis_validus,Leopardus_colocolo,Leopardus_geoffroyi,Leopardus_guigna,Leopardus_pardalis,Leopardus_tigrinus,Leopardus_wiedii,Leptailurus_serval,Lynx_canadensis,Lynx_lynx,Lynx_pardinus,Lynx_rufus,…	0
234	1	11.6	450	50	3.71316	1.04411	1	6.29398	0.001181	0.000771	0.000941	0.001372	0.007279	0.008579	0.008074	0.003655	0.013703	0.008942	0.010913	0.015917	Proailurus_lemanensis	0
235	48	8	532	59.1111	4.24948	1.08911	1.74306	7.66069	0.001348	0.000842	0.001059	0.001304	0.00502	0.005917	0.005568	0.002521	0.010783	0.006732	0.00847	0.010432	Acinonyx_jubatus,Caracal_aurata,Caracal_caracal,Dinofelis_cristata,FAM_62192,Felis_catus,Felis_chaus,Felis_margarita,Felis_nigripes,Felis_silvestris,Homotherium_crusafonti,Homotherium_nestianus,Hyperailurictis_validus,Leopardus_colocolo,Leopardus_geoffroyi,Leopardus_guigna,Leopardus_pardalis,Leopardus_tigrinus,Leopardus_wiedii,Leptailurus_serval,Lynx_canadensis,Lynx_lynx,Lynx_pardinus,Lynx_rufus,…	0
236	1	8	536	59.5556	5.53481	0.960309	1.7516	19.6519	0.001692	0.000907	0.001059	0.004238	0.00502	0.005917	0.005568	0.002521	0.013534	0.007258	0.00847	0.033906	Hyperailurictis_validus	0
237	47	10	674	74.8889	6.17819	1.5274	2.56861	23.2003	0.00193	0.001021	0.001361	0.003666	0.006275	0.007396	0.00696	0.003151	0.019303	0.010212	0.013608	0.036663	Acinonyx_jubatus,Caracal_aurata,Caracal_caracal,Dinofelis_cristata,FAM_62192,Felis_catus,Felis_chaus,Felis_margarita,Felis_nigripes,Felis_silvestris,Homotherium_crusafonti,Homotherium_nestianus,Leopardus_colocolo,Leopardus_geoffroyi,Leopardus_guigna,Leopardus_pardalis,Leopardus_tigrinus,Leopardus_wiedii,Leptailurus_serval,Lynx_canadensis,Lynx_lynx,Lynx_pardinus,Lynx_rufus,Megantereon_falconeri,Me…	0
238	7	2	786	87.3333	21.0599	2.24773	3.75263	53.9627	0.006249	0.001589	0.001987	0.009725	0.001255	0.001479	0.001392	0.00063	0.012497	0.003179	0.003974	0.019449	Dinofelis_cristata,Homotherium_crusafonti,Homotherium_nestianus,Megantereon_falconeri,Metailurus_parvulus,Smilodon_fatalis,Xenosmilus_hodsonae	0
239	1	5.984	707	78.5556	6.61444	1.62501	2.71885	18.5889	0.002211	0.001081	0.001511	0.003367	0.003755	0.004426	0.004165	0.001885	0.013233	0.006466	0.009042	0.020146	Metailurus_parvulus	0
240	6	1.917	701	77.8889	6.66232	1.30079	2.67034	30.9612	0.002042	0.001045	0.001461	0.005286	0.001203	0.001418	0.001334	0.000604	0.003915	0.002003	0.002801	0.010133	Dinofelis_cristata,Homotherium_crusafonti,Homotherium_nestianus,Megantereon_falconeri,Smilodon_fatalis,Xenosmilus_hodsonae	0
241	1	7.538	699	77.6667	5.20255	1.44426	2.63729	9.41591	0.001749	0.001064	0.001429	0.00149	0.00473	0.005575	0.005246	0.002375	0.013183	0.008023	0.010775	0.011235	Dinofelis_cristata	0
242	5	1.917	703	78.1111	6.60761	1.48089	2.67224	19.0225	0.002007	0.001029	0.001503	0.002985	0.001203	0.001418	0.001334	0.000604	0.003847	0.001973	0.002881	0.005722	Homotherium_crusafonti,Homotherium_nestianus,Megantereon_falconeri,Smilodon_fatalis,Xenosmilus_hodsonae	0
243	2	1.917	708	78.6667	5.6966	1.51394	2.65818	11.3138	0.001904	0.001048	0.001464	0.002523	0.001203	0.001418	0.001334	0.000604	0.003649	0.002008	0.002807	0.004836	Megantereon_falconeri,Smilodon_fatalis	0
244	1	6.343	711	79	5.6977	1.51545	2.69522	11.632	0.001885	0.001064	0.001487	0.0021	0.00398	0.004691	0.004415	0.001998	0.011956	0.006749	0.009433	0.013319	Smilodon_fatalis	0
245	1	3.683	708	78.6667	6.36405	1.59551	2.69522	16.0208	0.002069	0.001055	0.001498	0.002989	0.002311	0.002724	0.002563	0.00116	0.007619	0.003885	0.005517	0.011007	Megantereon_falconeri	0
246	3	3.978	715	79.4444	6.19891	1.77963	2.70958	15.2173	0.002001	0.001065	0.001523	0.002738	0.002496	0.002942	0.002769	0.001253	0.007959	0.004237	0.00606	0.010893	Homotherium_crusafonti,Homotherium_nestianus,Xenosmilus_hodsonae	0
247	1	2.294	709	78.7778	5.59214	1.57732	2.67394	11.1379	0.001875	0.00105	0.00149	0.002289	0.001439	0.001697	0.001597	0.000723	0.004301	0.002409	0.003417	0.00525	Homotherium_nestianus	0
248	2	0.144	725	80.5556	7.26353	1.85913	2.77392	18.5424	0.002344	0.001056	0.001573	0.003588	9e-05	0.000107	0.0001	4.5e-05	0.000338	0.000152	0.000227	0.000517	Homotherium_crusafonti,Xenosmilus_hodsonae	0
249	1	3.994	720	80	7.03366	1.87692	2.78683	15.7247	0.002495	0.001048	0.001583	0.004261	0.002506	0.002954	0.00278	0.001258	0.009966	0.004188	0.006321	0.01702	Xenosmilus_hodsonae	0
250	1	1.694	719	79.8889	6.80935	1.92476	2.73512	16.7925	0.002216	0.001067	0.001536	0.003248	0.001063	0.001253	0.001179	0.000534	0.003754	0.001808	0.002602	0.005502	Homotherium_crusafonti	0
251	40	2.74	723	80.3333	9.47976	1.92068	2.77979	27.8954	0.002934	0.001061	0.001608	0.005543	0.001719	0.002027	0.001907	0.000863	0.008038	0.002906	0.004407	0.015187	Acinonyx_jubatus,Caracal_aurata,Caracal_caracal,FAM_62192,Felis_catus,Felis_chaus,Felis_margarita,Felis_nigripes,Felis_silvestris,Leopardus_colocolo,Leopardus_geoffroyi,Leopardus_guigna,Leopardus_pardalis,Leopardus_tigrinus,Leopardus_wiedii,Leptailurus_serval,Lynx_canadensis,Lynx_lynx,Lynx_pardinus,Lynx_rufus,Miracinonyx_studeri,Neofelis_nebulosa,Otocolobus_manul,Panthera_atrox,Panthera_augusta,P…	0
252	1	6.31	699	77.6667	5.28697	1.20049	2.61214	13.7927	0.001604	0.001066	0.001448	0.000973	0.003959	0.004667	0.004392	0.001988	0.01012	0.006725	0.009136	0.006141	FAM_62192	0
253	39	0.74	736	81.7778	6.56392	2.52634	2.73234	17.0959	0.002118	0.001085	0.001596	0.003622	0.000464	0.000547	0.000515	0.000233	0.001568	0.000803	0.001181	0.00268	Acinonyx_jubatus,Caracal_aurata,Caracal_caracal,Felis_catus,Felis_chaus,Felis_margarita,Felis_nigripes,Felis_silvestris,Leopardus_colocolo,Leopardus_geoffroyi,Leopardus_guigna,Leopardus_pardalis,Leopardus_tigrinus,Leopardus_wiedii,Leptailurus_serval,Lynx_canadensis,Lynx_lynx,Lynx_pardinus,Lynx_rufus,Miracinonyx_studeri,Neofelis_nebulosa,Otocolobus_manul,Panthera_atrox,Panthera_augusta,Panthera_le…	0
254	9	0.74	783	87	9.85796	2.64902	3.22278	31.3334	0.003348	0.001867	0.001847	0.006246	0.000464	0.000547	0.000515	0.000233	0.002478	0.001381	0.001367	0.004622	Neofelis_nebulosa,Panthera_atrox,Panthera_augusta,Panthera_leo,Panthera_onca,Panthera_pardus,Panthera_spelaea,Panthera_tigris,Panthera_uncia	0
255	1	10.78	771	85.6667	6.49166	2.4949	2.93795	13.4698	0.002179	0.00113	0.001725	0.002591	0.006764	0.007973	0.007503	0.003396	0.023487	0.012184	0.018596	0.02793	Neofelis_nebulosa	0
256	8	1.2075	819	91	9.20984	2.55363	3.50274	19.9157	0.00318	0.001884	0.00197	0.005249	0.000758	0.000893	0.00084	0.00038	0.00384	0.002274	0.002379	0.006339	Panthera_atrox,Panthera_augusta,Panthera_leo,Panthera_onca,Panthera_pardus,Panthera_spelaea,Panthera_tigris,Panthera_uncia	0
257	2	1.2075	834	92.6667	12.8137	2.12425	3.71973	56.8257	0.004174	0.001798	0.002047	0.009628	0.000758	0.000893	0.00084	0.00038	0.00504	0.002171	0.002472	0.011626	Panthera_tigris,Panthera_uncia	0
258	1	8.365	839	93.2222	13.5816	2.05923	3.90283	57.5084	0.004207	0.001732	0.002079	0.009917	0.005249	0.006187	0.005822	0.002636	0.035191	0.014489	0.01739	0.082953	Panthera_tigris	0
259	1	8.365	829	92.1111	11.3035	3.0792	3.58328	56.6279	0.003369	0.001784	0.001998	0.007699	0.005249	0.006187	0.005822	0.002636	0.028184	0.014925	0.01671	0.064398	Panthera_uncia	0
260	6	1.99083	834	92.6667	11.673	2.80731	3.64608	61.9699	0.003427	0.001834	0.002047	0.006592	0.001249	0.001472	0.001386	0.000627	0.006824	0.003651	0.004075	0.013123	Panthera_atrox,Panthera_augusta,Panthera_leo,Panthera_onca,Panthera_pardus,Panthera_spelaea	0
261	2	4.48767	859	95.4444	17.099	3.34142	5.17608	41.4283	0.005797	0.001849	0.002563	0.01425	0.002816	0.003319	0.003123	0.001414	0.026014	0.008299	0.011502	0.063949	Panthera_augusta,Panthera_onca	1
262	1	2.039	859	95.4444	16.2378	3.00869	5.08812	34.0877	0.005675	0.001811	0.002509	0.009932	0.001279	0.001508	0.001419	0.000642	0.011571	0.003692	0.005116	0.020252	Panthera_augusta	1
263	1	3.094	894	99.3333	32.3509	5.30312	10.219	78.4915	0.010138	0.00259	0.005373	0.014255	0.001941	0.002288	0.002153	0.000975	0.031368	0.008013	0.016625	0.044105	Panthera_onca	1
264	4	1.99083	839	93.2222	10.2942	2.60598	3.68501	22.7954	0.003493	0.001816	0.002054	0.00552	0.001249	0.001472	0.001386	0.000627	0.006954	0.003615	0.00409	0.010989	Panthera_atrox,Panthera_leo,Panthera_pardus,Panthera_spelaea	0
265	1	5.59083	838	93.1111	9.35727	2.625	3.60748	19.8036	0.003021	0.001826	0.002041	0.003501	0.003508	0.004135	0.003891	0.001762	0.01689	0.010207	0.011409	0.019576	Panthera_pardus	0
266	3	2.32817	843	93.6667	14.2341	3.71759	4.03997	70.1381	0.004165	0.001802	0.002126	0.008422	0.001461	0.001722	0.00162	0.000734	0.009698	0.004195	0.00495	0.019607	Panthera_atrox,Panthera_leo,Panthera_spelaea	0
267	1	3.26267	841	93.4444	9.99028	2.68623	3.67598	21.7161	0.003142	0.001783	0.002052	0.00325	0.002047	0.002413	0.002271	0.001028	0.010252	0.005818	0.006694	0.010604	Panthera_leo	0
268	2	0.337333	843	93.6667	13.4814	2.38771	3.85125	40.741	0.003946	0.001773	0.002093	0.00605	0.000212	0.000249	0.000235	0.000106	0.001331	0.000598	0.000706	0.002041	Panthera_atrox,Panthera_spelaea	0
269	1	1.62533	843	93.6667	10.5472	2.77208	3.69812	23.1304	0.003468	0.001798	0.00207	0.004935	0.00102	0.001202	0.001131	0.000512	0.005636	0.002922	0.003365	0.008021	Panthera_spelaea	0
270	1	1.62933	850	94.4444	13.3739	2.57156	3.79482	52.3892	0.004299	0.001841	0.002093	0.014157	0.001022	0.001205	0.001134	0.000513	0.007004	0.003	0.003411	0.023066	Panthera_atrox	0
271	30	1.415	740	82.2222	6.42782	2.21361	2.72598	25.6266	0.001992	0.0011	0.001603	0.003952	0.000888	0.001047	0.000985	0.000446	0.002818	0.001557	0.002269	0.005591	Acinonyx_jubatus,Caracal_aurata,Caracal_caracal,Felis_catus,Felis_chaus,Felis_margarita,Felis_nigripes,Felis_silvestris,Leopardus_colocolo,Leopardus_geoffroyi,Leopardus_guigna,Leopardus_pardalis,Leopardus_tigrinus,Leopardus_wiedii,Leptailurus_serval,Lynx_canadensis,Lynx_lynx,Lynx_pardinus,Lynx_rufus,Miracinonyx_studeri,Otocolobus_manul,Pardofelis_badia,Pardofelis_marmorata,Pardofelis_temminckii,P…	0
272	3	0.675	744	82.6667	7.39543	2.49058	2.75653	23.3543	0.002436	0.001061	0.001633	0.008925	0.000424	0.000499	0.00047	0.000213	0.001645	0.000716	0.001103	0.006024	Pardofelis_badia,Pardofelis_marmorata,Pardofelis_temminckii	0
273	1	9.43	739	82.1111	5.77776	2.52818	2.69995	13.5684	0.001787	0.001119	0.001597	0.001443	0.005917	0.006975	0.006563	0.002971	0.016849	0.010548	0.015059	0.013607	Pardofelis_marmorata	0
274	2	4.7125	745	82.7778	6.24517	2.29227	2.73413	15.0388	0.001986	0.001123	0.001633	0.002249	0.002957	0.003485	0.00328	0.001485	0.009361	0.005294	0.007698	0.0106	Pardofelis_badia,Pardofelis_temminckii	0
275	1	4.7175	743	82.5556	6.31157	2.34276	2.69995	15.0074	0.001906	0.001106	0.001633	0.001913	0.00296	0.003489	0.003283	0.001486	0.008992	0.005218	0.007706	0.009022	Pardofelis_temminckii	0
276	1	4.7175	742	82.4444	6.48065	2.33739	2.71421	19.3738	0.001929	0.001122	0.001617	0.002331	0.00296	0.003489	0.003283	0.001486	0.0091	0.005292	0.007627	0.010998	Pardofelis_badia	0
277	27	1.135	749	83.2222	6.15418	2.40903	2.7367	18.0151	0.001943	0.001125	0.001633	0.002395	0.000712	0.000839	0.00079	0.000358	0.002205	0.001277	0.001854	0.002718	Acinonyx_jubatus,Caracal_aurata,Caracal_caracal,Felis_catus,Felis_chaus,Felis_margarita,Felis_nigripes,Felis_silvestris,Leopardus_colocolo,Leopardus_geoffroyi,Leopardus_guigna,Leopardus_pardalis,Leopardus_tigrinus,Leopardus_wiedii,Leptailurus_serval,Lynx_canadensis,Lynx_lynx,Lynx_pardinus,Lynx_rufus,Miracinonyx_studeri,Otocolobus_manul,Prionailurus_bengalensis,Prionailurus_planiceps,Prionailurus_…	0
278	3	0.46	750	83.3333	7.39723	2.42125	2.76959	33.6033	0.002163	0.001157	0.001659	0.005338	0.000289	0.00034	0.00032	0.000145	0.000995	0.000532	0.000763	0.002455	Caracal_aurata,Caracal_caracal,Leptailurus_serval	0
279	1	8.51	753	83.6667	5.69919	2.48965	2.73713	11.8428	0.001838	0.001155	0.001636	0.002009	0.00534	0.006294	0.005923	0.002681	0.01564	0.009829	0.013923	0.017094	Leptailurus_serval	0
280	2	2.355	753	83.6667	6.60832	2.65069	2.76065	19.2764	0.002121	0.001129	0.001645	0.004127	0.001478	0.001742	0.001639	0.000742	0.004995	0.002659	0.003873	0.009719	Caracal_aurata,Caracal_caracal	0
281	1	6.155	749	83.2222	5.99559	2.54598	2.71421	15.2182	0.001901	0.001085	0.001625	0.003043	0.003862	0.004552	0.004284	0.001939	0.011698	0.00668	0.010004	0.018727	Caracal_aurata	0
282	1	6.155	755	83.8889	6.17471	2.61058	2.76545	15.2118	0.001922	0.001136	0.001657	0.002106	0.003862	0.004552	0.004284	0.001939	0.011828	0.006991	0.010196	0.012963	Caracal_caracal	0
283	24	0.69	770	85.5556	5.9676	2.50341	2.79748	12.3316	0.002035	0.001139	0.001682	0.002658	0.000433	0.00051	0.00048	0.000217	0.001404	0.000786	0.001161	0.001834	Acinonyx_jubatus,Felis_catus,Felis_chaus,Felis_margarita,Felis_nigripes,Felis_silvestris,Leopardus_colocolo,Leopardus_geoffroyi,Leopardus_guigna,Leopardus_pardalis,Leopardus_tigrinus,Leopardus_wiedii,Lynx_canadensis,Lynx_lynx,Lynx_pardinus,Lynx_rufus,Miracinonyx_studeri,Otocolobus_manul,Prionailurus_bengalensis,Prionailurus_planiceps,Prionailurus_rubiginosus,Prionailurus_viverrinus,Puma_concolor,…	0
284	6	0.23	783	87	7.08866	2.55058	2.83494	15.7864	0.002264	0.001187	0.00173	0.003249	0.000144	0.00017	0.00016	7.2e-05	0.000521	0.000273	0.000398	0.000747	Leopardus_colocolo,Leopardus_geoffroyi,Leopardus_guigna,Leopardus_pardalis,Leopardus_tigrinus,Leopardus_wiedii	0
285	2	3.962	785	87.2222	7.11224	2.61087	2.84194	21.2083	0.002098	0.001201	0.001733	0.002158	0.002486	0.00293	0.002758	0.001248	0.008312	0.004757	0.006866	0.00855	Leopardus_pardalis,Leopardus_wiedii	0
286	1	4.088	800	88.8889	9.15958	2.24964	3.04262	29.402	0.002872	0.001865	0.001845	0.004203	0.002565	0.003024	0.002845	0.001288	0.011739	0.007625	0.007543	0.017183	Leopardus_pardalis	0
287	1	4.088	791	87.8889	7.78711	2.61197	2.93608	21.6049	0.002691	0.001218	0.001764	0.006052	0.002565	0.003024	0.002845	0.001288	0.011002	0.004977	0.007212	0.024741	Leopardus_wiedii	0
288	4	2.25833	791	87.8889	7.31234	2.61696	2.85339	19.5699	0.0023	0.001217	0.001741	0.003249	0.001417	0.00167	0.001572	0.000712	0.005194	0.002748	0.003932	0.007338	Leopardus_colocolo,Leopardus_geoffroyi,Leopardus_guigna,Leopardus_tigrinus	0
289	1	5.79167	793	88.1111	6.84534	2.43178	2.87181	12.7442	0.002291	0.001828	0.001775	0.003936	0.003634	0.004284	0.004031	0.001825	0.01327	0.010584	0.010279	0.022794	Leopardus_colocolo	0
290	3	4.94	802	89.1111	8.04089	2.42605	2.94826	19.1242	0.002492	0.001849	0.001814	0.003291	0.0031	0.003654	0.003438	0.001556	0.012312	0.009136	0.008961	0.016256	Leopardus_geoffroyi,Leopardus_guigna,Leopardus_tigrinus	0
291	1	0.851667	819	91	13.3837	2.48738	3.3618	39.2023	0.003903	0.001849	0.001948	0.006345	0.000534	0.00063	0.000593	0.000268	0.003324	0.001575	0.001659	0.005404	Leopardus_tigrinus	0
292	2	0.423333	813	90.3333	13.9723	2.35196	3.30498	48.9425	0.003995	0.001802	0.001926	0.007985	0.000266	0.000313	0.000295	0.000133	0.001691	0.000763	0.000815	0.00338	Leopardus_geoffroyi,Leopardus_guigna	0
293	1	0.428333	804	89.3333	9.58512	2.6889	3.01539	30.1978	0.002823	0.001819	0.001845	0.004246	0.000269	0.000317	0.000298	0.000135	0.001209	0.000779	0.00079	0.001819	Leopardus_geoffroyi	0
294	1	0.428333	812	90.2222	10.2976	2.26239	3.14301	27.1645	0.003078	0.001849	0.001885	0.005005	0.000269	0.000317	0.000298	0.000135	0.001319	0.000792	0.000807	0.002144	Leopardus_guigna	0
295	18	0.68	774	86	6.64385	2.37571	2.78744	13.6971	0.002235	0.001182	0.001692	0.003428	0.000427	0.000503	0.000473	0.000214	0.00152	0.000804	0.001151	0.002331	Acinonyx_jubatus,Felis_catus,Felis_chaus,Felis_margarita,Felis_nigripes,Felis_silvestris,Lynx_canadensis,Lynx_lynx,Lynx_pardinus,Lynx_rufus,Miracinonyx_studeri,Otocolobus_manul,Prionailurus_bengalensis,Prionailurus_planiceps,Prionailurus_rubiginosus,Prionailurus_viverrinus,Puma_concolor,Puma_yagouaroundi	0
296	4	0.45	770	85.5556	6.17895	2.52521	2.77823	18.0135	0.001974	0.001152	0.001679	0.002342	0.000282	0.000333	0.000313	0.000142	0.000888	0.000518	0.000755	0.001054	Lynx_canadensis,Lynx_lynx,Lynx_pardinus,Lynx_rufus	0
297	1	7.15	768	85.3333	6.20997	2.45554	2.73713	18.0369	0.001912	0.001132	0.001667	0.00229	0.004486	0.005288	0.004976	0.002253	0.013672	0.008097	0.011919	0.016372	Lynx_rufus	0
298	3	1.31667	779	86.5556	6.5538	2.31508	2.79748	14.9305	0.00225	0.001183	0.001692	0.00367	0.000826	0.000974	0.000916	0.000415	0.002962	0.001558	0.002228	0.004832	Lynx_canadensis,Lynx_lynx,Lynx_pardinus	0
299	1	5.83333	777	86.3333	5.90594	2.44121	2.78327	10.8475	0.002018	0.001169	0.00169	0.002214	0.00366	0.004314	0.00406	0.001838	0.011772	0.006822	0.009859	0.012914	Lynx_canadensis	0
300	2	1.31667	778	86.4444	6.62772	2.75077	2.79292	24.4349	0.002125	0.001152	0.001682	0.002773	0.000826	0.000974	0.000916	0.000415	0.002798	0.001516	0.002215	0.003652	Lynx_lynx,Lynx_pardinus	0
301	1	4.51667	774	86	7.15277	2.38736	2.78327	26.8233	0.00225	0.001198	0.001687	0.004168	0.002834	0.003341	0.003144	0.001423	0.010162	0.005412	0.007619	0.018824	Lynx_pardinus	0
302	1	4.51667	776	86.2222	6.02144	2.38237	2.79625	11.1117	0.002063	0.001171	0.001688	0.002485	0.002834	0.003341	0.003144	0.001423	0.009316	0.00529	0.007624	0.011224	Lynx_lynx	0
303	14	0.675	776	86.2222	7.28667	2.51265	2.77823	22.382	0.002333	0.001196	0.001679	0.004588	0.000424	0.000499	0.00047	0.000213	0.001575	0.000807	0.001133	0.003097	Acinonyx_jubatus,Felis_catus,Felis_chaus,Felis_margarita,Felis_nigripes,Felis_silvestris,Miracinonyx_studeri,Otocolobus_manul,Prionailurus_bengalensis,Prionailurus_planiceps,Prionailurus_rubiginosus,Prionailurus_viverrinus,Puma_concolor,Puma_yagouaroundi	0
304	4	0.225	781	86.7778	8.07828	2.50717	2.85093	28.221	0.002631	0.001185	0.001716	0.005376	0.000141	0.000166	0.000157	7.1e-05	0.000592	0.000267	0.000386	0.00121	Acinonyx_jubatus,Miracinonyx_studeri,Puma_concolor,Puma_yagouaroundi	0
305	1	6.7	777	86.3333	6.11762	2.43501	2.78156	18.1403	0.001973	0.001176	0.00168	0.002274	0.004204	0.004955	0.004663	0.002111	0.013216	0.00788	0.011258	0.015237	Acinonyx_jubatus	0
306	3	0.6	780	86.6667	6.16097	2.39509	2.81431	12.0851	0.002083	0.001167	0.0017	0.002764	0.000376	0.000444	0.000418	0.000189	0.00125	0.0007	0.00102	0.001658	Miracinonyx_studeri,Puma_concolor,Puma_yagouaroundi	0
307	1	6.1	790	87.7778	6.35321	2.43221	2.84767	11.4627	0.002252	0.001213	0.001721	0.003468	0.003828	0.004512	0.004246	0.001922	0.013735	0.007397	0.010498	0.021155	Puma_yagouaroundi	0
308	2	0.6	786	87.3333	7.438	2.31748	2.83828	27.7967	0.002386	0.001151	0.001705	0.004658	0.000376	0.000444	0.000418	0.000189	0.001432	0.00069	0.001023	0.002795	Miracinonyx_studeri,Puma_concolor	0
309	1	3.044	783	87	6.27335	2.29358	2.80271	17.708	0.002064	0.001192	0.001688	0.003228	0.00191	0.002251	0.002119	0.000959	0.006284	0.003627	0.00514	0.009826	Miracinonyx_studeri	0
310	1	5.5	784	87.1111	5.77225	2.48176	2.80688	9.91474	0.001988	0.001158	0.001696	0.002205	0.003451	0.004068	0.003828	0.001733	0.010935	0.006368	0.00933	0.012125	Puma_concolor	0
311	10	0.485	773	85.8889	6.20798	2.56593	2.77541	20.2545	0.002011	0.001161	0.001672	0.003095	0.000304	0.000359	0.000338	0.000153	0.000975	0.000563	0.000811	0.001501	Felis_catus,Felis_chaus,Felis_margarita,Felis_nigripes,Felis_silvestris,Otocolobus_manul,Prionailurus_bengalensis,Prionailurus_planiceps,Prionailurus_rubiginosus,Prionailurus_viverrinus	0
312	5	0.26	774	86	6.42805	2.26711	2.7367	17.367	0.002151	0.001173	0.001667	0.003966	0.000163	0.000192	0.000181	8.2e-05	0.000559	0.000305	0.000433	0.001031	Felis_catus,Felis_chaus,Felis_margarita,Felis_nigripes,Felis_silvestris	0
313	1	6.18	775	86.1111	5.8928	2.40813	2.76287	11.7437	0.001951	0.001173	0.001671	0.002493	0.003878	0.004571	0.004301	0.001947	0.012057	0.007248	0.01033	0.015409	Felis_chaus	0
314	4	0.645	778	86.4444	6.00154	2.33215	2.77979	11.2516	0.002053	0.001125	0.001684	0.003183	0.000405	0.000477	0.000449	0.000203	0.001324	0.000726	0.001086	0.002053	Felis_catus,Felis_margarita,Felis_nigripes,Felis_silvestris	0
315	1	5.535	773	85.8889	5.43667	2.40339	2.7367	9.61579	0.001781	0.001163	0.00167	0.001096	0.003473	0.004094	0.003852	0.001744	0.009858	0.006436	0.009244	0.006067	Felis_nigripes	0
316	3	0.645	779	86.5556	6.38388	2.29661	2.81418	14.8055	0.002193	0.001191	0.001688	0.00369	0.000405	0.000477	0.000449	0.000203	0.001415	0.000768	0.001089	0.00238	Felis_catus,Felis_margarita,Felis_silvestris	0
317	1	4.89	788	87.5556	7.4017	2.44412	2.87496	16.2434	0.002509	0.001156	0.001732	0.003638	0.003068	0.003617	0.003403	0.001541	0.01227	0.005655	0.00847	0.017789	Felis_margarita	0
318	2	0.645	784	87.1111	7.16796	2.43488	2.87156	16.234	0.002482	0.00121	0.001722	0.004499	0.000405	0.000477	0.000449	0.000203	0.001601	0.00078	0.001111	0.002902	Felis_catus,Felis_silvestris	0
319	1	4.245	783	87	6.72831	2.45324	2.8128	14.2538	0.002211	0.001155	0.001709	0.003554	0.002664	0.00314	0.002955	0.001337	0.009386	0.004903	0.007255	0.015088	Felis_catus	0
320	1	4.245	782	86.8889	6.58023	2.42466	2.81431	19.6396	0.002164	0.001156	0.001695	0.003387	0.002664	0.00314	0.002955	0.001337	0.009184	0.004908	0.007195	0.014377	Felis_silvestris	0
321	5	0.26	775	86.1111	6.10768	2.32533	2.77392	12.1736	0.002149	0.001189	0.001668	0.003911	0.000163	0.000192	0.000181	8.2e-05	0.000559	0.000309	0.000434	0.001017	Otocolobus_manul,Prionailurus_bengalensis,Prionailurus_planiceps,Prionailurus_rubiginosus,Prionailurus_viverrinus	0
322	1	6.18	769	85.4444	5.41802	2.4797	2.7367	11.0303	0.001749	0.001141	0.001659	0.001433	0.003878	0.004571	0.004301	0.001947	0.010811	0.007053	0.010252	0.008855	Otocolobus_manul	0
323	4	0.898	775	86.1111	5.92222	2.33122	2.76545	12.7688	0.001925	0.001157	0.001672	0.001918	0.000563	0.000664	0.000625	0.000283	0.001729	0.001039	0.001502	0.001722	Prionailurus_bengalensis,Prionailurus_planiceps,Prionailurus_rubiginosus,Prionailurus_viverrinus	0
324	1	5.282	776	86.2222	5.73037	2.38678	2.76959	10.7728	0.001939	0.001134	0.001667	0.002482	0.003314	0.003907	0.003676	0.001664	0.010242	0.005989	0.008805	0.013108	Prionailurus_rubiginosus	0
325	3	0.898	777	86.3333	6.20901	2.50196	2.77392	13.3286	0.002174	0.001178	0.001668	0.004391	0.000563	0.000664	0.000625	0.000283	0.001952	0.001058	0.001498	0.003943	Prionailurus_bengalensis,Prionailurus_planiceps,Prionailurus_viverrinus	0
326	1	4.384	775	86.1111	5.85025	2.4558	2.7367	13.0987	0.0019	0.001141	0.001667	0.002145	0.002751	0.003242	0.003051	0.001381	0.008329	0.005	0.007307	0.009402	Prionailurus_planiceps	0
327	2	0.898	777	86.3333	6.04487	2.34493	2.77823	11.7536	0.002069	0.001171	0.001667	0.003084	0.000563	0.000664	0.000625	0.000283	0.001858	0.001052	0.001497	0.002769	Prionailurus_bengalensis,Prionailurus_viverrinus	0
328	1	3.486	777	86.3333	6.13515	2.34528	2.80756	13.545	0.002087	0.001176	0.001676	0.002912	0.002187	0.002578	0.002426	0.001098	0.007274	0.004099	0.005841	0.01015	Prionailurus_bengalensis	0
329	1	3.486	776	86.2222	6.0335	2.55635	2.7827	14.6068	0.002069	0.001145	0.001672	0.002917	0.002187	0.002578	0.002426	0.001098	0.007212	0.003991	0.00583	0.010169	Prionailurus_viverrinus	0
330	2	38.3684	551	61.2222	16.8638	0.575626	3.29908	105.132	0.004116	0.000972	0.001168	0.005646	0.024075	0.028378	0.026704	0.012089	0.157943	0.037303	0.044825	0.21661	Sus_scrofa,Tayassu_pecari	0
331	1	40.0242	569	63.2222	15.6759	1.45261	3.63059	43.5795	0.004474	0.000941	0.001208	0.006665	0.025114	0.029602	0.027857	0.01261	0.179054	0.037648	0.048356	0.266778	Tayassu_pecari	0
332	1	40.0242	870	96.6667	38.7221	12.2593	16.0787	74.8417	0.012321	0.008387	0.010082	0.011893	0.025114	0.029602	0.027857	0.01261	0.493152	0.335682	0.403533	0.475992	Sus_scrofa	1
333	66	19.2528	605	67.2222	15.3699	1.15036	2.8295	57.1243	0.004419	0.001015	0.001268	0.007625	0.01208	0.01424	0.0134	0.006066	0.085083	0.019538	0.024415	0.146804	Artibeus_jamaicensis,Artibeus_lituratus,Carollia_castanea,Carollia_perspicillata,Centurio_senex,Chiroderma_villosum,Cynopterus_brachyotis,Desmodus_rotundus,Eidolon_helvum,Emballonura_monticola,Eptesicus_furinalis,Erophylla_sezekorni,Glossophaga_soricina,Hipposideros_bicolor,Hipposideros_cervinus,Hipposideros_diadema,Hipposideros_galeritus,Hipposideros_larvatus,Hipposideros_lylei,Hipposideros_ridl…	0
334	19	4.08788	483	53.6667	4.07263	1.02737	1.38227	6.50929	0.00131	0.000818	0.001033	0.001909	0.002565	0.003023	0.002845	0.001288	0.005354	0.003345	0.004221	0.007804	Cynopterus_brachyotis,Eidolon_helvum,Hipposideros_bicolor,Hipposideros_cervinus,Hipposideros_diadema,Hipposideros_galeritus,Hipposideros_larvatus,Hipposideros_lylei,Hipposideros_ridleyi,Pteropus_poliocephalus,Pteropus_vampyrus,Rhinolophus_affinis,Rhinolophus_lepidus,Rhinolophus_luctus,Rhinolophus_robinsoni,Rhinolophus_sedulus,Rhinolophus_stheno,Rhinolophus_trifoliatus,Rousettus_aegyptiacus	0
335	14	16.8941	484	53.7778	4.31656	1.08265	1.34287	8.06628	0.001314	0.000799	0.001031	0.001839	0.0106	0.012495	0.011758	0.005323	0.022206	0.013504	0.017418	0.031072	Hipposideros_bicolor,Hipposideros_cervinus,Hipposideros_diadema,Hipposideros_galeritus,Hipposideros_larvatus,Hipposideros_lylei,Hipposideros_ridleyi,Rhinolophus_affinis,Rhinolophus_lepidus,Rhinolophus_luctus,Rhinolophus_robinsoni,Rhinolophus_sedulus,Rhinolophus_stheno,Rhinolophus_trifoliatus	0
336	7	11.341	488	54.2222	4.73658	0.822446	1.37019	21.6721	0.001252	0.000798	0.00103	0.001276	0.007116	0.008388	0.007893	0.003573	0.014202	0.009046	0.011678	0.014469	Rhinolophus_affinis,Rhinolophus_lepidus,Rhinolophus_luctus,Rhinolophus_robinsoni,Rhinolophus_sedulus,Rhinolophus_stheno,Rhinolophus_trifoliatus	0
337	6	1e-05	495	55	4.63596	1.09269	1.39227	10.2915	0.001511	0.000768	0.001031	0.003347	0	0	0	0	0	0	0	0	Rhinolophus_affinis,Rhinolophus_lepidus,Rhinolophus_robinsoni,Rhinolophus_sedulus,Rhinolophus_stheno,Rhinolophus_trifoliatus	0
338	5	4.62626	506	56.2222	4.36419	1.17351	1.44669	11.9443	0.0014	0.000788	0.001029	0.002443	0.002903	0.003422	0.00322	0.001458	0.006479	0.003644	0.004759	0.011302	Rhinolophus_affinis,Rhinolophus_lepidus,Rhinolophus_robinsoni,Rhinolophus_sedulus,Rhinolophus_stheno	0
339	3	4.06963	512	56.8889	4.6234	1.0511	1.47132	12.8173	0.00143	0.000788	0.001029	0.002322	0.002554	0.00301	0.002832	0.001282	0.005819	0.003207	0.004188	0.009452	Rhinolophus_lepidus,Rhinolophus_robinsoni,Rhinolophus_sedulus	0
340	2	3.60411	508	56.4444	4.91367	1.06282	1.4026	17.0568	0.001457	0.000798	0.001022	0.002413	0.002261	0.002666	0.002508	0.001136	0.005251	0.002877	0.003682	0.008698	Rhinolophus_robinsoni,Rhinolophus_sedulus	0
341	1	18	505	56.1111	4.03908	1.08782	1.38227	6.79118	0.001293	0.00081	0.001022	0.001515	0.011294	0.013313	0.012528	0.005671	0.023275	0.01458	0.018388	0.027271	Rhinolophus_robinsoni	0
342	1	18	514	57.1111	4.25757	1.07476	1.42671	7.9774	0.001399	0.00079	0.001026	0.002214	0.011294	0.013313	0.012528	0.005671	0.025183	0.014221	0.018473	0.039859	Rhinolophus_sedulus	0
343	1	21.6041	505	56.1111	4.20086	1.12113	1.35203	9.60803	0.00126	0.000792	0.001018	0.001304	0.013556	0.015979	0.015036	0.006807	0.027223	0.017101	0.021991	0.028171	Rhinolophus_lepidus	0
344	2	16.1237	503	55.8889	4.06701	1.0265	1.35203	6.90747	0.001279	0.000801	0.001023	0.00145	0.010117	0.011925	0.011222	0.00508	0.020621	0.01291	0.016495	0.023375	Rhinolophus_affinis,Rhinolophus_stheno	0
345	1	9.55	504	56	3.93052	1.0766	1.34287	6.00636	0.001302	0.00079	0.001022	0.00193	0.005992	0.007063	0.006647	0.003009	0.012439	0.007541	0.009756	0.018433	Rhinolophus_stheno	0
346	1	9.55	504	56	4.31788	1.11403	1.36384	10.6823	0.00127	0.000787	0.001026	0.001348	0.005992	0.007063	0.006647	0.003009	0.012131	0.007519	0.009801	0.012878	Rhinolophus_affinis	0
347	1	30.3	487	54.1111	3.80616	1.0632	1.30492	5.61907	0.001184	0.000804	0.001022	0.001008	0.019012	0.02241	0.021089	0.009547	0.035883	0.024372	0.030953	0.030544	Rhinolophus_trifoliatus	0
348	1	30.3	506	56.2222	5.13582	1.14413	1.60509	21.2746	0.001479	0.0008	0.001055	0.002052	0.019012	0.02241	0.021089	0.009547	0.044814	0.024248	0.031971	0.062162	Rhinolophus_luctus	0
349	7	9.441	488	54.2222	4.03126	1.02875	1.3197	6.12774	0.001261	0.000789	0.00103	0.001333	0.005924	0.006983	0.006571	0.002975	0.011902	0.007449	0.009721	0.012582	Hipposideros_bicolor,Hipposideros_cervinus,Hipposideros_diadema,Hipposideros_galeritus,Hipposideros_larvatus,Hipposideros_lylei,Hipposideros_ridleyi	0
350	3	0.2	524	58.2222	5.5325	1.08042	1.68541	17.4816	0.001681	0.000802	0.001072	0.004644	0.000125	0.000148	0.000139	6.3e-05	0.000336	0.00016	0.000214	0.000929	Hipposideros_cervinus,Hipposideros_galeritus,Hipposideros_ridleyi	0
351	2	1e-05	540	60	5.77669	1.26293	1.94633	13.0498	0.002027	0.000819	0.001102	0.003597	0	0	0	0	0	0	0	0	Hipposideros_cervinus,Hipposideros_galeritus	0
352	1	32	566	62.8889	6.95624	1.27679	2.17399	20.7333	0.002238	0.000883	0.00116	0.003638	0.020079	0.023667	0.022272	0.010082	0.071625	0.028258	0.037128	0.11642	Hipposideros_galeritus	0
353	1	32	528	58.6667	5.25694	1.07842	1.76661	13.4116	0.001712	0.000803	0.001079	0.002966	0.020079	0.023667	0.022272	0.010082	0.054769	0.025706	0.034516	0.094918	Hipposideros_cervinus	0
354	1	32	509	56.5556	4.27576	1.04905	1.53001	6.81998	0.001377	0.000808	0.001048	0.001725	0.020079	0.023667	0.022272	0.010082	0.04407	0.02586	0.033536	0.055205	Hipposideros_ridleyi	0
355	4	1e-05	503	55.8889	4.97267	0.937839	1.44827	12.7227	0.001523	0.000806	0.001032	0.002743	0	0	0	0	0	0	0	0	Hipposideros_bicolor,Hipposideros_diadema,Hipposideros_larvatus,Hipposideros_lylei	0
356	1	32.2	502	55.7778	4.05393	1.03841	1.41948	6.4659	0.001281	0.000789	0.001031	0.001446	0.020204	0.023815	0.022411	0.010145	0.041248	0.025399	0.033198	0.046571	Hipposideros_diadema	0
357	3	1e-05	510	56.6667	5.02806	1.02176	1.46045	15.013	0.001559	0.00081	0.001037	0.003841	0	0	0	0	0	0	0	0	Hipposideros_bicolor,Hipposideros_larvatus,Hipposideros_lylei	0
358	1	32.2	498	55.3333	4.01413	1.07191	1.30492	7.08858	0.001211	0.000788	0.001028	0.001034	0.020204	0.023815	0.022411	0.010145	0.039008	0.025358	0.033109	0.0333	Hipposideros_bicolor	0
359	2	10.15	514	57.1111	4.82474	1.13708	1.48053	12.6697	0.00142	0.000809	0.001048	0.001797	0.006369	0.007507	0.007064	0.003198	0.014414	0.008213	0.010634	0.018236	Hipposideros_larvatus,Hipposideros_lylei	0
360	1	22.05	506	56.2222	4.43255	1.16598	1.37019	12.6441	0.001292	0.000796	0.001025	0.001344	0.013836	0.016308	0.015347	0.006947	0.028492	0.017544	0.02259	0.029628	Hipposideros_larvatus	0
361	1	22.05	504	56	4.12241	1.08545	1.35522	6.73956	0.001346	0.000808	0.001028	0.001886	0.013836	0.016308	0.015347	0.006947	0.029674	0.017807	0.022678	0.041583	Hipposideros_lylei	0
362	5	33.0851	524	58.2222	5.95181	1.13708	1.75003	19.8355	0.001634	0.000857	0.001088	0.003002	0.02076	0.02447	0.023027	0.010424	0.054066	0.02834	0.035983	0.099326	Cynopterus_brachyotis,Eidolon_helvum,Pteropus_poliocephalus,Pteropus_vampyrus,Rousettus_aegyptiacus	0
363	1	25.45	525	58.3333	7.15179	0.692385	1.85376	40.9807	0.001727	0.000812	0.001103	0.002966	0.015969	0.018823	0.017713	0.008019	0.04394	0.020669	0.028062	0.075495	Cynopterus_brachyotis	0
364	4	1.05	665	73.8889	11.8108	1.65072	3.3724	37.2501	0.004268	0.001123	0.001454	0.011307	0.000659	0.000777	0.000731	0.000331	0.004481	0.001179	0.001527	0.011872	Eidolon_helvum,Pteropus_poliocephalus,Pteropus_vampyrus,Rousettus_aegyptiacus	0
365	2	12.3	716	79.5556	14.9559	2.04465	4.8863	43.2432	0.005255	0.001236	0.001846	0.010771	0.007718	0.009097	0.008561	0.003875	0.064633	0.015201	0.0227	0.132485	Pteropus_poliocephalus,Pteropus_vampyrus	0
366	1	12.1	672	74.6667	10.4187	1.9184	3.52847	30.15	0.003595	0.001105	0.001482	0.008002	0.007592	0.008949	0.008422	0.003812	0.043497	0.013373	0.017931	0.096822	Pteropus_vampyrus	0
367	1	12.1	670	74.4444	10.5717	1.8083	3.52847	30.1596	0.003686	0.001143	0.001485	0.008019	0.007592	0.008949	0.008422	0.003812	0.044595	0.013834	0.017969	0.097033	Pteropus_poliocephalus	0
368	2	8.86667	681	75.6667	12.2692	2.02554	3.57751	39.0138	0.003958	0.001153	0.001532	0.011396	0.005563	0.006558	0.006171	0.002794	0.035094	0.010221	0.013583	0.101043	Eidolon_helvum,Rousettus_aegyptiacus	0
369	1	15.5333	710	78.8889	13.9811	1.83227	4.31635	38.2325	0.004483	0.001244	0.001775	0.00739	0.009747	0.011489	0.010811	0.004894	0.069628	0.01933	0.027569	0.114788	Eidolon_helvum	0
370	1	15.5333	699	77.6667	12.5312	1.84787	4.04894	36.9189	0.004152	0.001263	0.001666	0.009353	0.009747	0.011489	0.010811	0.004894	0.064496	0.019613	0.025883	0.145286	Rousettus_aegyptiacus	0
371	47	7.29602	566	62.8889	4.78341	1.27188	2.11886	13.7831	0.001465	0.000886	0.001164	0.001667	0.004578	0.005396	0.005078	0.002299	0.010687	0.006466	0.00849	0.012161	Artibeus_jamaicensis,Artibeus_lituratus,Carollia_castanea,Carollia_perspicillata,Centurio_senex,Chiroderma_villosum,Desmodus_rotundus,Emballonura_monticola,Eptesicus_furinalis,Erophylla_sezekorni,Glossophaga_soricina,Kerivoula_intermedia,Kerivoula_papillosa,Kerivoula_pellucida,Lophostoma_brasiliense,Lophostoma_silvicolum,Micronycteris_brachyotis,Micronycteris_hirsuta,Micronycteris_microtis,Micron…	0
372	3	1.27166	570	63.3333	5.03045	1.11176	2.09181	11.3669	0.001553	0.000857	0.001166	0.002502	0.000798	0.000941	0.000885	0.000401	0.001975	0.001089	0.001483	0.003181	Emballonura_monticola,Nycteris_tragata,Taphozous_melanopogon	0
373	2	8.52956	577	64.1111	4.78678	1.1646	2.11886	9.17236	0.001545	0.000871	0.001163	0.001965	0.005352	0.006309	0.005937	0.002687	0.013175	0.007426	0.00992	0.016761	Emballonura_monticola,Taphozous_melanopogon	0
374	1	45.5257	571	63.4444	4.74879	1.12462	2.11218	12.5251	0.001416	0.000882	0.00116	0.001406	0.028566	0.033671	0.031686	0.014344	0.06448	0.040132	0.052821	0.06399	Taphozous_melanopogon	0
375	1	45.5257	574	63.7778	5.02305	1.08196	2.11512	11.6345	0.001477	0.000871	0.001163	0.001443	0.028566	0.033671	0.031686	0.014344	0.067257	0.039643	0.052948	0.065692	Emballonura_monticola	0
376	1	54.0553	567	63	4.74482	1.0822	2.09183	11.0863	0.001494	0.000865	0.001161	0.002463	0.033918	0.03998	0.037622	0.017031	0.080744	0.046757	0.062744	0.133142	Nycteris_tragata	0
377	44	2.67082	668	74.2222	6.03554	1.12928	2.49985	19.9741	0.001761	0.001078	0.001379	0.00213	0.001676	0.001975	0.001859	0.000841	0.004703	0.002879	0.003683	0.005689	Artibeus_jamaicensis,Artibeus_lituratus,Carollia_castanea,Carollia_perspicillata,Centurio_senex,Chiroderma_villosum,Desmodus_rotundus,Eptesicus_furinalis,Erophylla_sezekorni,Glossophaga_soricina,Kerivoula_intermedia,Kerivoula_papillosa,Kerivoula_pellucida,Lophostoma_brasiliense,Lophostoma_silvicolum,Micronycteris_brachyotis,Micronycteris_hirsuta,Micronycteris_microtis,Micronycteris_minuta,Mimon_c…	0
378	28	9.28974	687	76.3333	5.84722	1.48149	2.5298	16.1351	0.001853	0.001144	0.001413	0.003741	0.005829	0.006871	0.006466	0.002927	0.017213	0.010626	0.013127	0.034749	Artibeus_jamaicensis,Artibeus_lituratus,Carollia_castanea,Carollia_perspicillata,Centurio_senex,Chiroderma_villosum,Desmodus_rotundus,Erophylla_sezekorni,Glossophaga_soricina,Lophostoma_brasiliense,Lophostoma_silvicolum,Micronycteris_brachyotis,Micronycteris_hirsuta,Micronycteris_microtis,Micronycteris_minuta,Mimon_crenulatum,Monophyllus_redmani,Noctilio_albiventris,Noctilio_leporinus,Phyllostomu…	0
379	2	40.5988	689	76.5556	5.60796	1.61184	2.52557	22.6331	0.001649	0.001108	0.001411	0.00206	0.025474	0.030027	0.028257	0.012792	0.066963	0.044982	0.057285	0.083618	Noctilio_albiventris,Noctilio_leporinus	0
380	1	2.76755	686	76.2222	5.29994	1.21151	2.52774	12.1355	0.001732	0.001134	0.001411	0.00301	0.001737	0.002047	0.001926	0.000872	0.004795	0.003138	0.003905	0.008329	Noctilio_leporinus	0
381	1	2.76755	688	76.4444	5.17792	1.3599	2.52774	9.80951	0.001743	0.001099	0.001411	0.002464	0.001737	0.002047	0.001926	0.000872	0.004823	0.003041	0.003905	0.006819	Noctilio_albiventris	0
382	26	14.3664	716	79.5556	5.50803	1.31484	2.61505	11.6977	0.00177	0.001135	0.001518	0.002064	0.009014	0.010625	0.009999	0.004526	0.025434	0.016313	0.021807	0.029658	Artibeus_jamaicensis,Artibeus_lituratus,Carollia_castanea,Carollia_perspicillata,Centurio_senex,Chiroderma_villosum,Desmodus_rotundus,Erophylla_sezekorni,Glossophaga_soricina,Lophostoma_brasiliense,Lophostoma_silvicolum,Micronycteris_brachyotis,Micronycteris_hirsuta,Micronycteris_microtis,Micronycteris_minuta,Mimon_crenulatum,Monophyllus_redmani,Phyllostomus_discolor,Phyllostomus_elongatus,Phyllo…	0
383	25	1e-05	762	84.6667	7.11506	2.3702	2.91835	18.5078	0.002412	0.001214	0.001676	0.005215	0	0	0	0	0	0	0	0	Artibeus_jamaicensis,Artibeus_lituratus,Carollia_castanea,Carollia_perspicillata,Centurio_senex,Chiroderma_villosum,Erophylla_sezekorni,Glossophaga_soricina,Lophostoma_brasiliense,Lophostoma_silvicolum,Micronycteris_brachyotis,Micronycteris_hirsuta,Micronycteris_microtis,Micronycteris_minuta,Mimon_crenulatum,Monophyllus_redmani,Phyllostomus_discolor,Phyllostomus_elongatus,Phyllostomus_hastatus,Pl…	0
384	13	5.93766	783	87	6.67166	2.46858	2.97718	12.2489	0.002435	0.001274	0.001714	0.00462	0.003726	0.004392	0.004133	0.001871	0.01446	0.007563	0.010175	0.027432	Artibeus_jamaicensis,Artibeus_lituratus,Carollia_castanea,Carollia_perspicillata,Centurio_senex,Chiroderma_villosum,Erophylla_sezekorni,Glossophaga_soricina,Monophyllus_redmani,Platyrrhinus_helleri,Platyrrhinus_lineatus,Sturnira_lilium,Uroderma_bilobatum	0
385	10	1.92977	786	87.3333	7.90074	2.3171	2.99743	24.4791	0.002479	0.00127	0.001737	0.003851	0.001211	0.001427	0.001343	0.000608	0.004783	0.00245	0.003352	0.007432	Artibeus_jamaicensis,Artibeus_lituratus,Carollia_castanea,Carollia_perspicillata,Centurio_senex,Chiroderma_villosum,Platyrrhinus_helleri,Platyrrhinus_lineatus,Sturnira_lilium,Uroderma_bilobatum	0
386	8	4.06923	793	88.1111	6.95175	2.5291	3.00815	13.5961	0.002472	0.001291	0.001767	0.004571	0.002553	0.00301	0.002832	0.001282	0.010058	0.005253	0.007189	0.018599	Artibeus_jamaicensis,Artibeus_lituratus,Centurio_senex,Chiroderma_villosum,Platyrrhinus_helleri,Platyrrhinus_lineatus,Sturnira_lilium,Uroderma_bilobatum	0
387	1	17.0633	791	87.8889	5.91032	2.53944	2.98733	9.75453	0.001996	0.001286	0.001726	0.001824	0.010707	0.01262	0.011876	0.005376	0.034064	0.02194	0.029443	0.031124	Sturnira_lilium	0
388	7	3.43793	813	90.3333	7.47372	2.49973	3.17208	17.6075	0.00265	0.001725	0.001846	0.006609	0.002157	0.002543	0.002393	0.001083	0.009109	0.005929	0.006348	0.022721	Artibeus_jamaicensis,Artibeus_lituratus,Centurio_senex,Chiroderma_villosum,Platyrrhinus_helleri,Platyrrhinus_lineatus,Uroderma_bilobatum	0
389	3	1.78161	820	91.1111	9.17965	2.61799	3.29922	23.3295	0.002863	0.001727	0.001897	0.004361	0.001118	0.001318	0.00124	0.000561	0.005101	0.003077	0.00338	0.00777	Artibeus_jamaicensis,Artibeus_lituratus,Centurio_senex	0
390	1	11.8438	853	94.7778	14.1554	2.72141	3.94159	36.4771	0.004682	0.001786	0.00223	0.006565	0.007432	0.00876	0.008243	0.003732	0.055454	0.021151	0.026407	0.077752	Centurio_senex	0
391	2	9.08713	821	91.2222	8.60732	2.69402	3.32863	20.0902	0.002945	0.001476	0.001898	0.005557	0.005702	0.006721	0.006325	0.002863	0.026759	0.013415	0.017251	0.050495	Artibeus_jamaicensis,Artibeus_lituratus	0
392	1	2.75667	823	91.4444	7.60805	2.68574	3.29676	15.7068	0.002685	0.001662	0.001891	0.00538	0.00173	0.002039	0.001919	0.000869	0.007402	0.004582	0.005212	0.01483	Artibeus_lituratus	0
393	1	2.75667	821	91.2222	9.49353	3.02593	3.32627	54.518	0.002815	0.001445	0.001898	0.00467	0.00173	0.002039	0.001919	0.000869	0.007761	0.003984	0.005232	0.012875	Artibeus_jamaicensis	0
394	4	2.1254	826	91.7778	15.3486	3.02506	3.42724	106.028	0.00401	0.001492	0.001935	0.008029	0.001334	0.001572	0.001479	0.00067	0.008522	0.003171	0.004112	0.017065	Chiroderma_villosum,Platyrrhinus_helleri,Platyrrhinus_lineatus,Uroderma_bilobatum	0
395	3	1.59226	827	91.8889	12.5311	2.94822	3.43771	51.925	0.00382	0.001672	0.001976	0.011834	0.000999	0.001178	0.001108	0.000502	0.006083	0.002663	0.003146	0.018842	Platyrrhinus_helleri,Platyrrhinus_lineatus,Uroderma_bilobatum	0
396	2	1.75774	844	93.7778	18.1569	3.29557	3.71072	121.457	0.004854	0.001707	0.002101	0.011091	0.001103	0.0013	0.001223	0.000554	0.008533	0.003	0.003693	0.019495	Platyrrhinus_helleri,Platyrrhinus_lineatus	0
397	1	8.15	833	92.5556	10.3517	2.52978	3.50392	25.7836	0.003311	0.001721	0.00198	0.004698	0.005114	0.006028	0.005672	0.002568	0.026984	0.014023	0.01614	0.038289	Platyrrhinus_lineatus	0
398	1	8.15	826	91.7778	9.61544	2.72133	3.39513	24.6932	0.002977	0.001708	0.001951	0.003795	0.005114	0.006028	0.005672	0.002568	0.024266	0.013921	0.015898	0.03093	Platyrrhinus_helleri	0
399	1	9.90774	820	91.1111	8.35037	2.51816	3.32189	22.5186	0.002716	0.001404	0.001896	0.004632	0.006217	0.007328	0.006896	0.003122	0.026908	0.013906	0.01879	0.045888	Uroderma_bilobatum	0
400	1	11.5	818	90.8889	7.48117	2.4444	3.19623	20.8481	0.002334	0.001359	0.001844	0.002493	0.007216	0.008505	0.008004	0.003623	0.026838	0.015623	0.021205	0.028673	Chiroderma_villosum	0
401	2	16.0326	784	87.1111	5.84168	2.50153	2.92772	9.30036	0.00195	0.001252	0.001714	0.001521	0.01006	0.011858	0.011159	0.005051	0.03127	0.02008	0.027473	0.02439	Carollia_castanea,Carollia_perspicillata	0
402	1	5.1	788	87.5556	6.13118	2.40192	2.96124	11.7809	0.002014	0.001248	0.001717	0.001972	0.0032	0.003772	0.00355	0.001607	0.010272	0.006365	0.008757	0.010057	Carollia_perspicillata	0
403	1	5.1	786	87.3333	6.27377	2.43679	2.95594	11.6765	0.002052	0.001275	0.001717	0.002016	0.0032	0.003772	0.00355	0.001607	0.010464	0.0065	0.008757	0.01028	Carollia_castanea	0
404	3	3.79086	842	93.5556	19.929	2.56674	3.88066	56.9785	0.006473	0.001712	0.002175	0.016442	0.002379	0.002804	0.002638	0.001194	0.024539	0.006489	0.008244	0.062327	Erophylla_sezekorni,Glossophaga_soricina,Monophyllus_redmani	0
405	2	4.25077	821	91.2222	11.1693	2.57993	3.46474	33.9497	0.00355	0.001716	0.001951	0.005443	0.002667	0.003144	0.002959	0.001339	0.01509	0.007296	0.008295	0.023138	Glossophaga_soricina,Monophyllus_redmani	0
406	1	15.0207	817	90.7778	9.65132	2.49531	3.35375	24.5605	0.003204	0.001692	0.001912	0.005037	0.009425	0.011109	0.010454	0.004733	0.048122	0.025416	0.028717	0.075664	Glossophaga_soricina	0
407	1	15.0207	824	91.5556	16.0342	3.25588	3.59747	85.7963	0.00428	0.001751	0.002007	0.007691	0.009425	0.011109	0.010454	0.004733	0.064286	0.0263	0.030146	0.11552	Monophyllus_redmani	0
408	1	19.2715	810	90	8.74619	2.48434	3.29676	22.8152	0.002907	0.001394	0.001884	0.004573	0.012092	0.014253	0.013413	0.006072	0.056026	0.026873	0.03631	0.08812	Erophylla_sezekorni	0
409	12	1e-05	774	86	6.95862	2.24181	2.9245	16.7986	0.002397	0.001274	0.001674	0.00506	0	0	0	0	0	0	0	0	Lophostoma_brasiliense,Lophostoma_silvicolum,Micronycteris_brachyotis,Micronycteris_hirsuta,Micronycteris_microtis,Micronycteris_minuta,Mimon_crenulatum,Phyllostomus_discolor,Phyllostomus_elongatus,Phyllostomus_hastatus,Tonatia_saurophila,Trachops_cirrhosus	0
410	8	7.6385	783	87	6.93025	2.20706	2.95594	18.2743	0.002296	0.001257	0.001701	0.00335	0.004793	0.005649	0.005316	0.002407	0.017541	0.009602	0.012995	0.025586	Lophostoma_brasiliense,Lophostoma_silvicolum,Mimon_crenulatum,Phyllostomus_discolor,Phyllostomus_elongatus,Phyllostomus_hastatus,Tonatia_saurophila,Trachops_cirrhosus	0
411	7	3.45225	781	86.7778	7.50371	2.38058	2.96966	15.2674	0.002694	0.001237	0.001712	0.005301	0.002166	0.002553	0.002403	0.001088	0.009299	0.004269	0.005909	0.018299	Lophostoma_brasiliense,Lophostoma_silvicolum,Mimon_crenulatum,Phyllostomus_discolor,Phyllostomus_elongatus,Phyllostomus_hastatus,Tonatia_saurophila	0
412	6	0.675253	783	87	7.15706	2.17569	2.91101	27.5451	0.0022	0.001264	0.00169	0.00406	0.000424	0.000499	0.00047	0.000213	0.001485	0.000854	0.001141	0.002741	Lophostoma_brasiliense,Lophostoma_silvicolum,Mimon_crenulatum,Phyllostomus_discolor,Phyllostomus_elongatus,Phyllostomus_hastatus	0
413	2	8.384	783	87	7.32028	2.21957	2.9245	18.122	0.002279	0.001249	0.001713	0.003003	0.005261	0.006201	0.005835	0.002642	0.019109	0.010469	0.014358	0.025177	Lophostoma_brasiliense,Lophostoma_silvicolum	0
414	1	8.85	785	87.2222	7.22237	2.33813	2.91835	21.4224	0.0022	0.001284	0.001696	0.003429	0.005553	0.006546	0.00616	0.002788	0.019471	0.011367	0.015012	0.030349	Lophostoma_silvicolum	0
415	1	8.85	784	87.1111	6.46985	2.34852	2.90961	13.979	0.002201	0.001266	0.001696	0.003971	0.005553	0.006546	0.00616	0.002788	0.019481	0.0112	0.01501	0.035139	Lophostoma_brasiliense	0
416	4	2.634	784	87.1111	6.15733	2.30146	2.90546	10.1938	0.002129	0.001203	0.001691	0.002685	0.001653	0.001948	0.001833	0.00083	0.005607	0.003168	0.004454	0.007073	Mimon_crenulatum,Phyllostomus_discolor,Phyllostomus_elongatus,Phyllostomus_hastatus	0
417	3	1e-05	795	88.3333	8.26449	2.15206	2.99454	28.4571	0.002496	0.001284	0.001717	0.003735	0	0	0	0	0	0	0	0	Phyllostomus_discolor,Phyllostomus_elongatus,Phyllostomus_hastatus	0
418	2	8.9	796	88.4444	7.14199	2.33023	2.98445	15.7228	0.002375	0.001261	0.001727	0.003311	0.005584	0.006583	0.006194	0.002804	0.021133	0.011224	0.015367	0.029471	Phyllostomus_elongatus,Phyllostomus_hastatus	0
419	1	5.7	802	89.1111	8.21881	2.38818	3.11304	16.8397	0.002854	0.001262	0.001798	0.004422	0.003577	0.004216	0.003967	0.001796	0.01627	0.007192	0.010247	0.025207	Phyllostomus_hastatus	0
420	1	5.7	798	88.6667	8.92999	2.1786	3.04622	29.9524	0.002632	0.001265	0.001771	0.003711	0.003577	0.004216	0.003967	0.001796	0.015002	0.007213	0.010093	0.021155	Phyllostomus_elongatus	0
421	1	14.6	785	87.2222	6.36627	2.30567	2.91835	11.7526	0.002122	0.001214	0.001698	0.002594	0.009161	0.010798	0.010162	0.0046	0.030985	0.017726	0.024798	0.037875	Phyllostomus_discolor	0
422	1	14.6	781	86.7778	6.02329	2.30987	2.84635	11.4227	0.001923	0.001214	0.001668	0.00203	0.009161	0.010798	0.010162	0.0046	0.02807	0.017727	0.024358	0.029644	Mimon_crenulatum	0
423	1	17.9093	777	86.3333	5.7791	2.26391	2.8479	11.013	0.001847	0.001228	0.001666	0.001335	0.011237	0.013246	0.012465	0.005643	0.03307	0.021986	0.029835	0.023914	Tonatia_saurophila	0
424	1	21.3615	771	85.6667	6.31976	2.15896	2.85849	21.7087	0.001859	0.001233	0.001672	0.001248	0.013404	0.015799	0.014868	0.00673	0.039702	0.026332	0.03572	0.026659	Trachops_cirrhosus	0
425	4	5.92585	788	87.5556	6.33741	2.46378	3.02287	10.2653	0.002276	0.001257	0.001729	0.003025	0.003718	0.004383	0.004124	0.001867	0.013486	0.007452	0.010244	0.017927	Micronycteris_brachyotis,Micronycteris_hirsuta,Micronycteris_microtis,Micronycteris_minuta	0
426	3	10.6756	802	89.1111	7.59884	2.44672	3.14775	20.3527	0.002834	0.001345	0.001785	0.012475	0.006699	0.007896	0.00743	0.003364	0.030259	0.014359	0.01906	0.133174	Micronycteris_hirsuta,Micronycteris_microtis,Micronycteris_minuta	0
427	2	2.89039	822	91.3333	14.483	2.24207	3.51911	51.7967	0.004592	0.001572	0.001946	0.013345	0.001814	0.002138	0.002012	0.000911	0.013272	0.004544	0.005625	0.038573	Micronycteris_hirsuta,Micronycteris_microtis	0
428	1	9.50813	810	90	8.69263	2.50689	3.25468	25.6603	0.002848	0.001655	0.001841	0.004599	0.005966	0.007032	0.006618	0.002996	0.027075	0.01574	0.017508	0.043725	Micronycteris_microtis	0
429	1	9.50813	811	90.1111	9.86772	2.28265	3.25076	37.0344	0.003041	0.001701	0.001843	0.005185	0.005966	0.007032	0.006618	0.002996	0.028913	0.016171	0.017527	0.049301	Micronycteris_hirsuta	0
430	1	12.3985	818	90.8889	10.2399	2.35966	3.32988	30.7533	0.003244	0.001584	0.001886	0.005742	0.00778	0.00917	0.008629	0.003906	0.040225	0.019644	0.023385	0.071196	Micronycteris_minuta	0
431	1	23.0741	787	87.4444	6.92636	2.62297	2.99284	23.0756	0.002156	0.001255	0.001729	0.002326	0.014478	0.017066	0.01606	0.00727	0.04975	0.028958	0.039889	0.053664	Micronycteris_brachyotis	0
432	1	29	711	79	5.53787	1.40115	2.61646	9.16766	0.00186	0.001136	0.001514	0.002273	0.018196	0.021449	0.020184	0.009137	0.053932	0.032933	0.043897	0.065917	Desmodus_rotundus	0
433	16	7.15612	695	77.2222	5.48587	1.31952	2.6048	9.13457	0.001836	0.001117	0.001462	0.002172	0.00449	0.005293	0.004981	0.002255	0.013139	0.007994	0.010462	0.015543	Eptesicus_furinalis,Kerivoula_intermedia,Kerivoula_papillosa,Kerivoula_pellucida,Molossus_sinaloae,Mops_mops,Murina_aenea,Murina_cyclotis,Murina_suilla,Myotis_albescens,Myotis_ater,Myotis_nigricans,Myotis_ridleyi,Myotis_simus,Phoniscus_jagorii,Scotophilus_kuhlii	0
[truncated: 434 more rows]

## Sheet: rep3
Node ID	No Taxa	Original BL	No different from original	Pct time scaled	Mean Scalar	Mode Scalar	Median Scalar	SD Scalar	Mean SigV	Mode SigV	Median SigV	SD SigV	Mean DeltaB	Mode DeltaB	Median DeltaB	SD DeltaB	Mean DeltaV	Mode DeltaV	Median DeltaV	SD DeltaV	Taxa List	PPS
[truncated: 868 more rows]
